# Supplementary material
Source: PubMed Central journal article supplement (PMC7480002)

**Supplemental Figure S5.** Identification of genes

implicated in more than 1,000 records classified as human rare diseases using the Enrichr bioinformatics platform

(see Methods for details).

# Rare Diseases GeneRIF Gene Lists: 8,405 genes

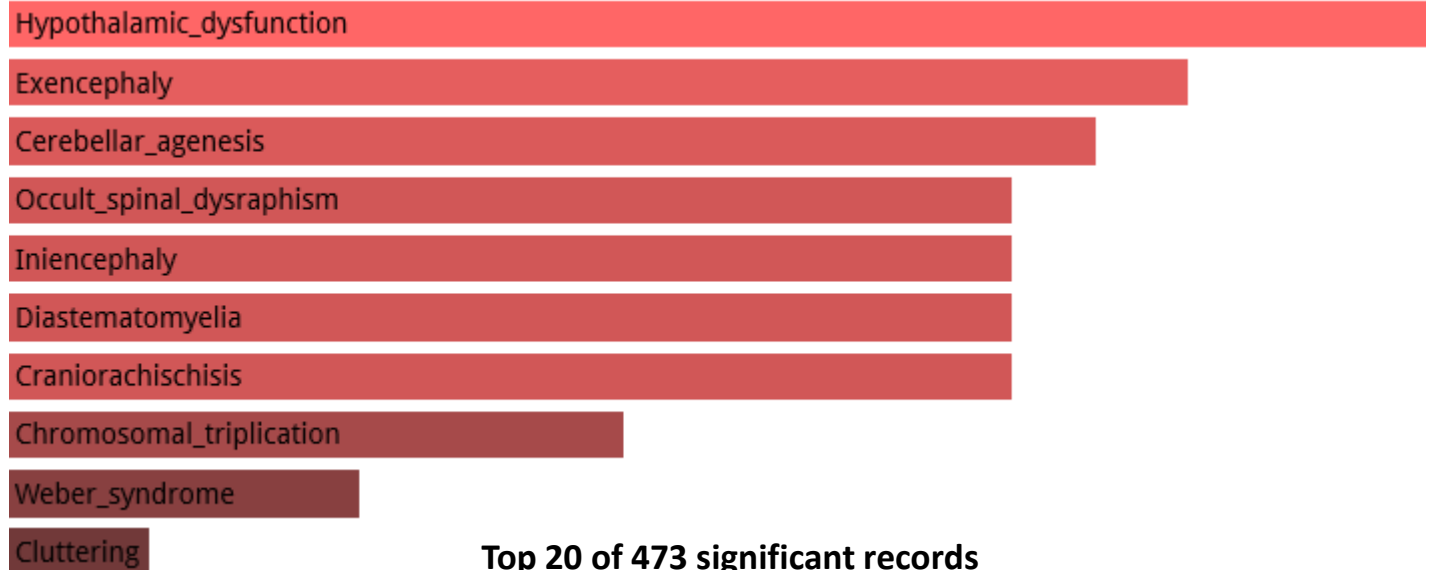

Top 20 of 473 significant records

| Term                            | Overlap | P-value  | Adjusted P-value |
|---------------------------------|---------|----------|------------------|
| Hypothalamic_dysfunction        | 90/128  | 8.12E-11 | 6.55E-08         |
| Exencephaly                     | 158/256 | 1.38E-10 | 6.55E-08         |
| Cerebellar_agenesis             | 198/335 | 1.7E-10  | 6.55E-08         |
| Occult_spinal_dysraphism        | 157/255 | 2.05E-10 | 6.55E-08         |
| Diastematomyelia                | 157/255 | 2.05E-10 | 6.55E-08         |
| Craniorachischisis              | 157/255 | 2.05E-10 | 6.55E-08         |
| Iniencephaly                    | 157/255 | 2.05E-10 | 6.55E-08         |
| Chromosomal_triplication        | 201/344 | 4.9E-10  | 1.37E-07         |
| Weber_syndrome                  | 94/139  | 8.85E-10 | 2.2E-07          |
| Cluttering                      | 106/162 | 1.41E-09 | 3.16E-07         |
| Mental_retardation_epilepsy     | 190/326 | 1.92E-09 | 3.9E-07          |
| Single_ventricular_heart        | 73/104  | 5.49E-09 | 1.02E-06         |
| Sydenham's_chorea               | 209/369 | 8.42E-09 | 1.34E-06         |
| Chorea_minor                    | 209/369 | 8.42E-09 | 1.34E-06         |
| Antisocial_personality_disorder | 46/59   | 1.93E-08 | 2.87E-06         |
| Sudden_infant_death_syndrome    | 103/162 | 2.37E-08 | 3.31E-06         |
| Stress_cardiomyopathy           | 110/176 | 3.16E-08 | 4.16E-06         |
| N_syndrome                      | 222/401 | 3.89E-08 | 4.83E-06         |
| Basilar_migraine                | 127/210 | 4.85E-08 | 5.7E-06          |
| Corpus_callosum_agenesis        | 89/138  | 7.92E-08 | 8.85E-06         |

# Rare Diseases GeneRIF Gene Lists: 8,405 genes

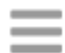

## Enriched Terms

Input Genes

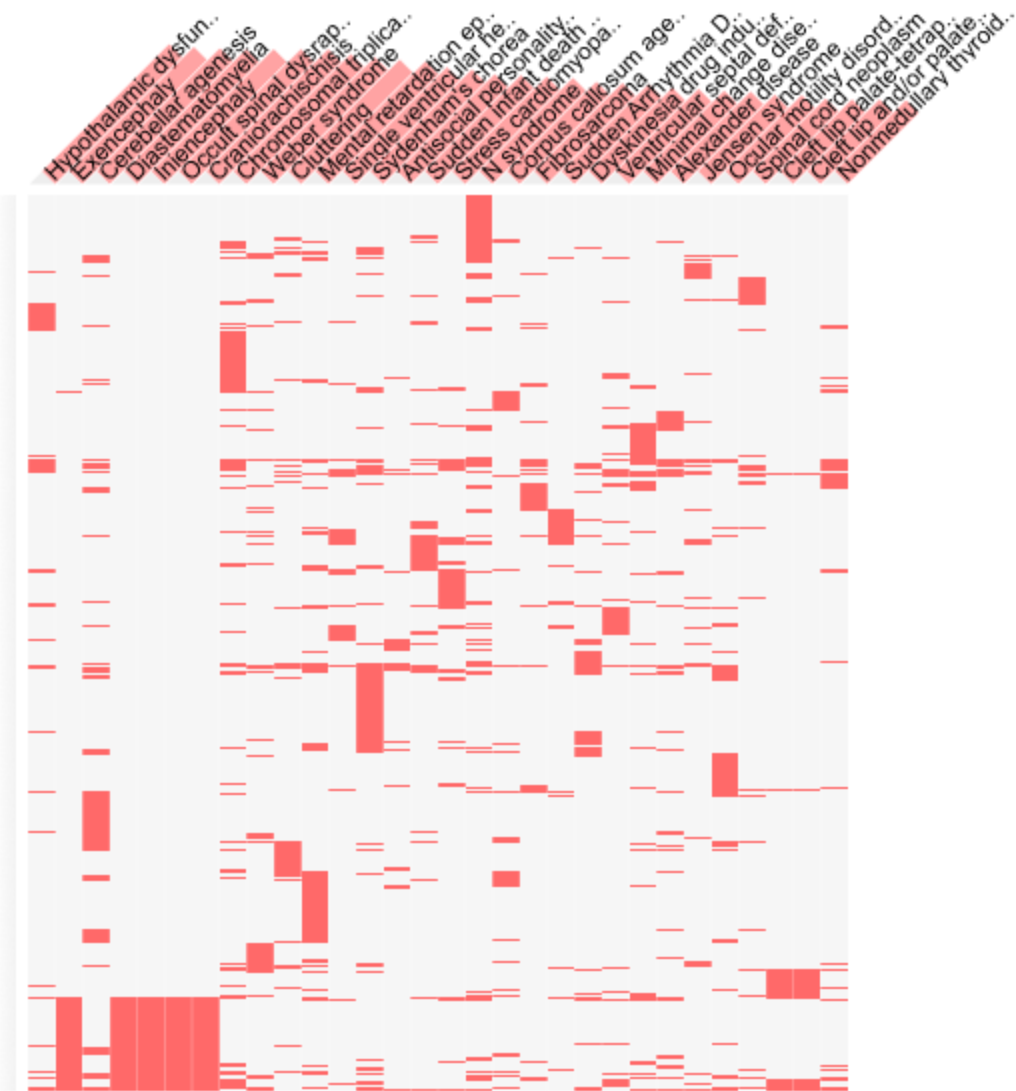

# Rare Diseases GeneRIF ARCHS4 Predictions: 8,405 genes

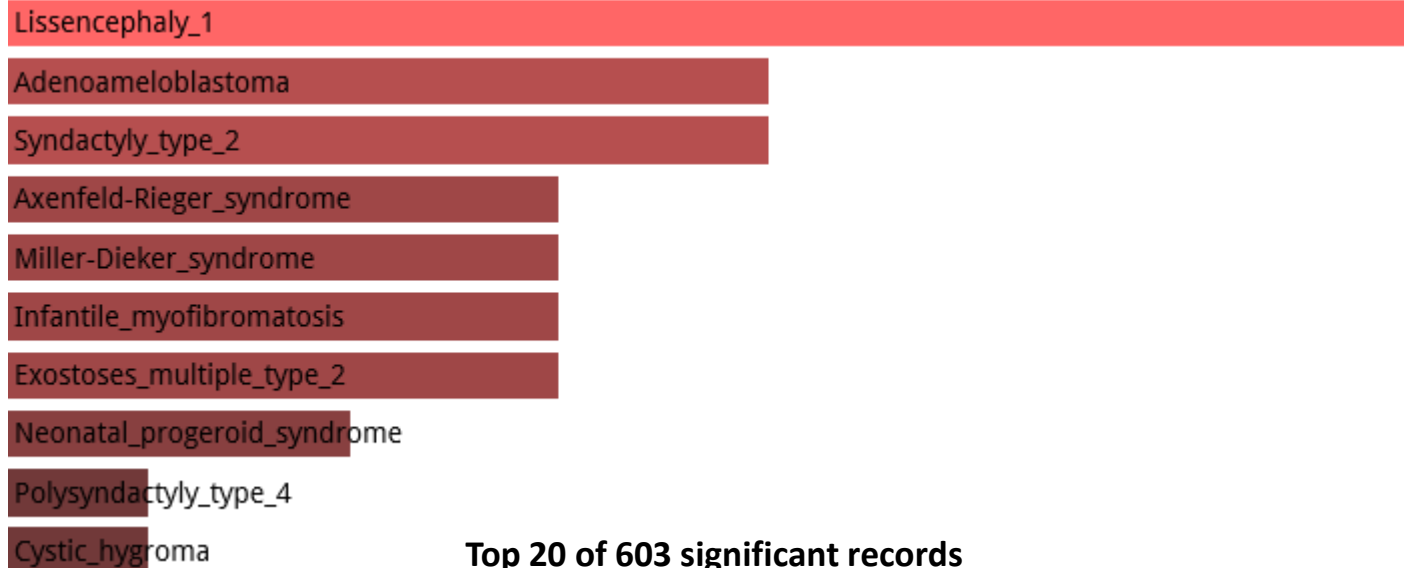

Top 20 of 603 significant records

| Term                                         | Overlap | P-value  | Adjusted P-value |
|----------------------------------------------|---------|----------|------------------|
| Lissencephaly_1                              | 154/200 | 4.79E-24 | 1.08E-20         |
| Adenoameloblastoma                           | 151/200 | 4.35E-22 | 3.26E-19         |
| Syndactyly_type_2                            | 151/200 | 4.35E-22 | 3.26E-19         |
| Axenfeld-Rieger_syndrome                     | 150/200 | 1.85E-21 | 5.94E-19         |
| Miller-Dieker_syndrome                       | 150/200 | 1.85E-21 | 5.94E-19         |
| Exostoses_multiple_type_2                    | 150/200 | 1.85E-21 | 5.94E-19         |
| Infantile_myofibromatosis                    | 150/200 | 1.85E-21 | 5.94E-19         |
| Neonatal_progeroid_syndrome                  | 149/200 | 7.69E-21 | 2.16E-18         |
| Polysyndactyly_type_4                        | 148/200 | 3.11E-20 | 6.97E-18         |
| Cystic_hygrroma                              | 148/200 | 3.11E-20 | 6.97E-18         |
| Acromesomelic_dysplasia_Hunter_Thompson_type | 147/200 | 1.22E-19 | 2.11E-17         |
| Acromesomelic_dysplasia                      | 147/200 | 1.22E-19 | 2.11E-17         |
| Exostoses_multiple_type_1                    | 147/200 | 1.22E-19 | 2.11E-17         |
| Scholte_syndrome                             | 146/200 | 4.69E-19 | 6.58E-17         |
| Congenital_diaphragmatic_hernia              | 146/200 | 4.69E-19 | 6.58E-17         |
| Hereditary_multiple_osteochondromas          | 146/200 | 4.69E-19 | 6.58E-17         |
| Aortopulmonary_window                        | 145/200 | 1.76E-18 | 1.88E-16         |
| Corpus_callosum_agenesis                     | 145/200 | 1.76E-18 | 1.88E-16         |
| Apert_syndrome                               | 145/200 | 1.76E-18 | 1.88E-16         |
| Subependymoma                                | 145/200 | 1.76E-18 | 1.88E-16         |

# Rare Diseases GeneRIF ARCHS4 Predictions: 8,405 genes

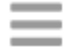

## Enriched Terms

Input Genes

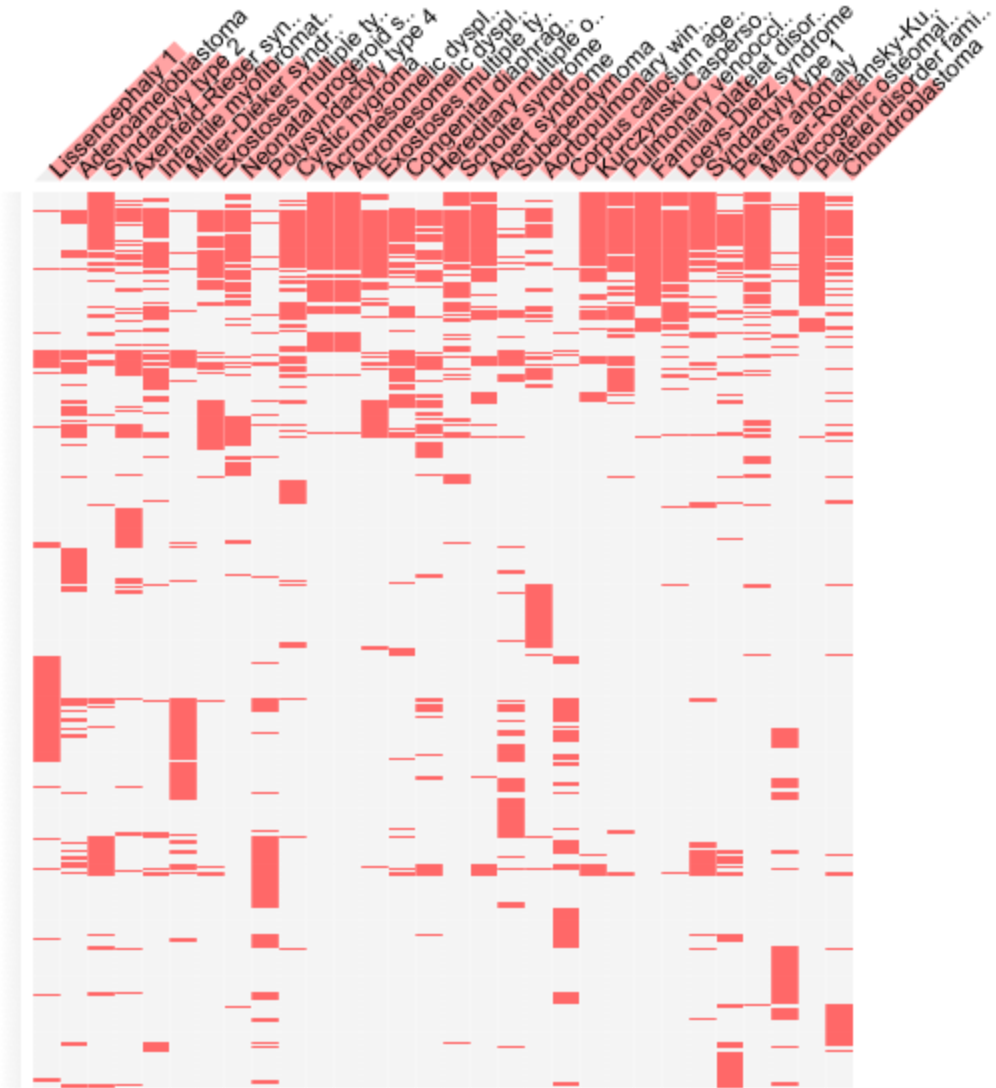

# Rare Diseases AutoRIF ARCHS4 Predictions: 8,405 genes

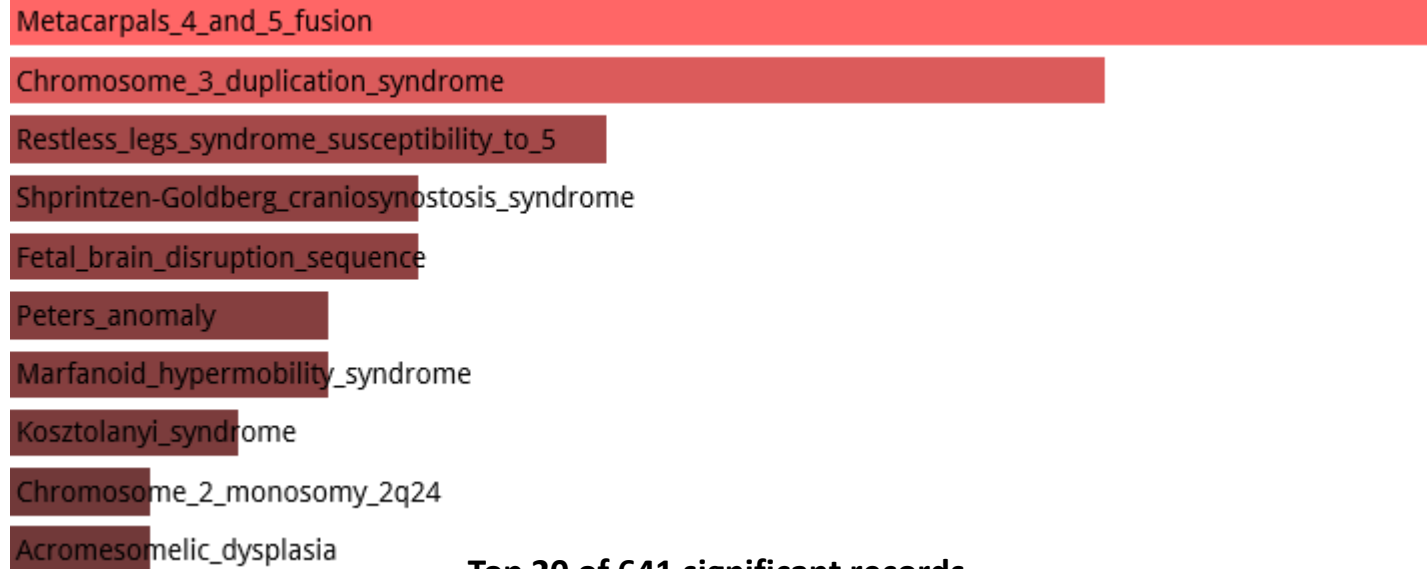

## Top 20 of 641 significant records

| Term                                          | Overlap | P-value  | Adjusted P-value |
|-----------------------------------------------|---------|----------|------------------|
| Metacarpals_4_and_5_fusion                    | 163/200 | 1.33E-30 | 4.97E-27         |
| Chromosome_3_duplication_syndrome             | 160/200 | 2.69E-28 | 5.01E-25         |
| Restless_legs_syndrome_susceptibility_to_5    | 155/200 | 1.01E-24 | 1.25E-21         |
| Shprintzen-Goldberg_craniosynostosis_syndrome | 153/200 | 2.21E-23 | 1.65E-20         |
| Fetal_brain_disruption_sequence               | 153/200 | 2.21E-23 | 1.65E-20         |
| Peters_anomaly                                | 152/200 | 9.95E-23 | 5.3E-20          |
| Marfanoid_hypermobility_syndrome              | 152/200 | 9.95E-23 | 5.3E-20          |
| Kosztolanyi_syndrome                          | 151/200 | 4.35E-22 | 2.03E-19         |
| Chromosome_2_monosomy_2q24                    | 150/200 | 1.85E-21 | 6.28E-19         |
| Acromesomelic_dysplasia_Hunter_Thompson_type  | 150/200 | 1.85E-21 | 6.28E-19         |
| Acromesomelic_dysplasia                       | 150/200 | 1.85E-21 | 6.28E-19         |
| Chromosome_3_trisomy_3p                       | 149/200 | 7.69E-21 | 2.2E-18          |
| Buschke-Ollendorff_syndrome                   | 149/200 | 7.69E-21 | 2.2E-18          |
| Fraser_like_syndrome                          | 148/200 | 3.11E-20 | 6.81E-18         |
| Crandall_syndrome                             | 148/200 | 3.11E-20 | 6.81E-18         |
| Orofaciodigital_syndrome_11                   | 148/200 | 3.11E-20 | 6.81E-18         |
| Postaxial_polydactyly_mental_retardation      | 148/200 | 3.11E-20 | 6.81E-18         |
| Short_rib-polydactyly_syndrome_type_4         | 147/200 | 1.22E-19 | 2.28E-17         |
| Trichorhinophalangeal_syndrome_type_3         | 147/200 | 1.22E-19 | 2.28E-17         |
| Duane_syndrome                                | 147/200 | 1.22E-19 | 2.28E-17         |

# Rare Diseases AutoRIF ARCHS4 Predictions: 8,405 genes

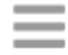

## Enriched Terms

Input Genes

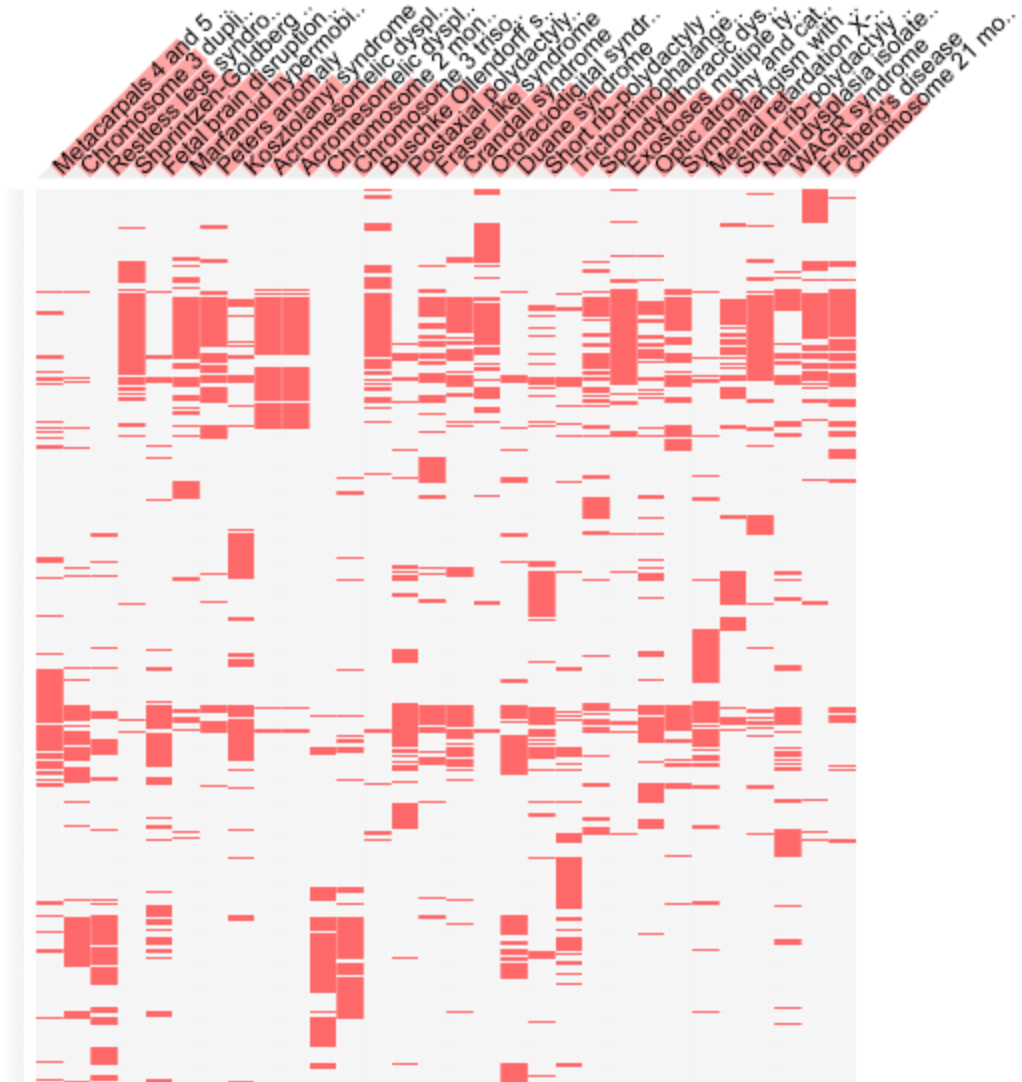

## Rare Diseases AutoRIF Gene Lists: 8,405 genes

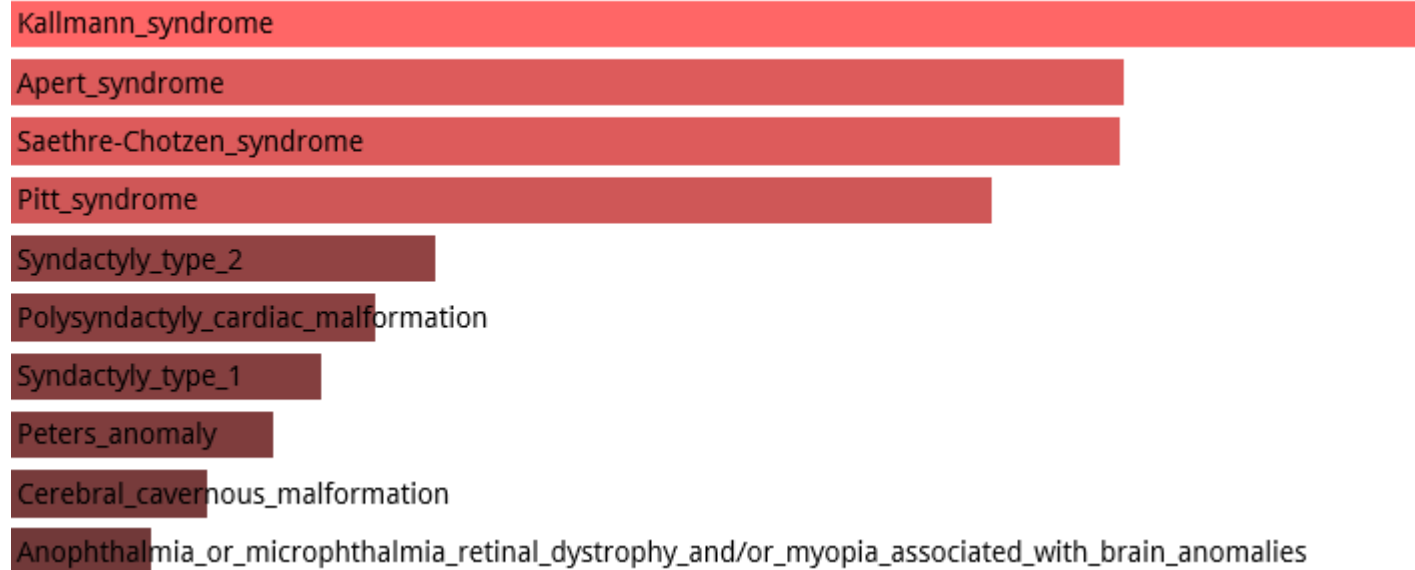

### Top 20 of 1,116 significant records

| Term                                                                                           | Overlap | P-value  | Adjusted P-value |
|------------------------------------------------------------------------------------------------|---------|----------|------------------|
| Kallmann_syndrome                                                                              | 159/247 | 9.25E-13 | 3.25E-09         |
| Apert_syndrome                                                                                 | 143/219 | 2.58E-12 | 3.25E-09         |
| Saethre-Chotzen_syndrome                                                                       | 136/206 | 2.62E-12 | 3.25E-09         |
| Pitt_syndrome                                                                                  | 241/410 | 4.01E-12 | 3.73E-09         |
| Syndactyly_type_2                                                                              | 124/188 | 2.62E-11 | 1.95E-08         |
| Polysyndactyly_cardiac_malformation                                                            | 77/104  | 3.2E-11  | 1.98E-08         |
| Syndactyly_type_1                                                                              | 122/185 | 3.85E-11 | 2.04E-08         |
| Peters_anomaly                                                                                 | 75/101  | 4.53E-11 | 2.1E-08          |
| Cerebral_cavernous_malformation                                                                | 157/252 | 5.65E-11 | 2.33E-08         |
| Anophthalmia_or_microphthalmia_retinal_dystrophy_and/or_myopia_associated_with_brain_anomalies | 182/301 | 6.82E-11 | 2.36E-08         |
| X-linked_periventricular_heterotopia                                                           | 89/126  | 6.98E-11 | 2.36E-08         |
| Aniridia                                                                                       | 171/282 | 1.85E-10 | 5.73E-08         |
| Dominant_cleft_palate                                                                          | 163/267 | 2.37E-10 | 6.76E-08         |
| Craniofacial_and_skeletal_defects                                                              | 94/137  | 2.64E-10 | 7.01E-08         |
| Anodontia                                                                                      | 140/223 | 2.84E-10 | 7.03E-08         |
| Glaucoma_congenital                                                                            | 202/345 | 3.48E-10 | 8.08E-08         |
| Childhood-Onset_Schizophrenia                                                                  | 168/278 | 3.87E-10 | 8.46E-08         |
| Hennekam_syndrome                                                                              | 139/223 | 6.68E-10 | 1.38E-07         |
| Kurczynski_Casperson_syndrome                                                                  | 114/176 | 8.57E-10 | 1.68E-07         |
| Osteochondroma                                                                                 | 177/299 | 1.31E-09 | 2.44E-07         |



# Rare Diseases AutoRIF Gene Lists: 8,405 genes



## Enriched Terms

Input Genes

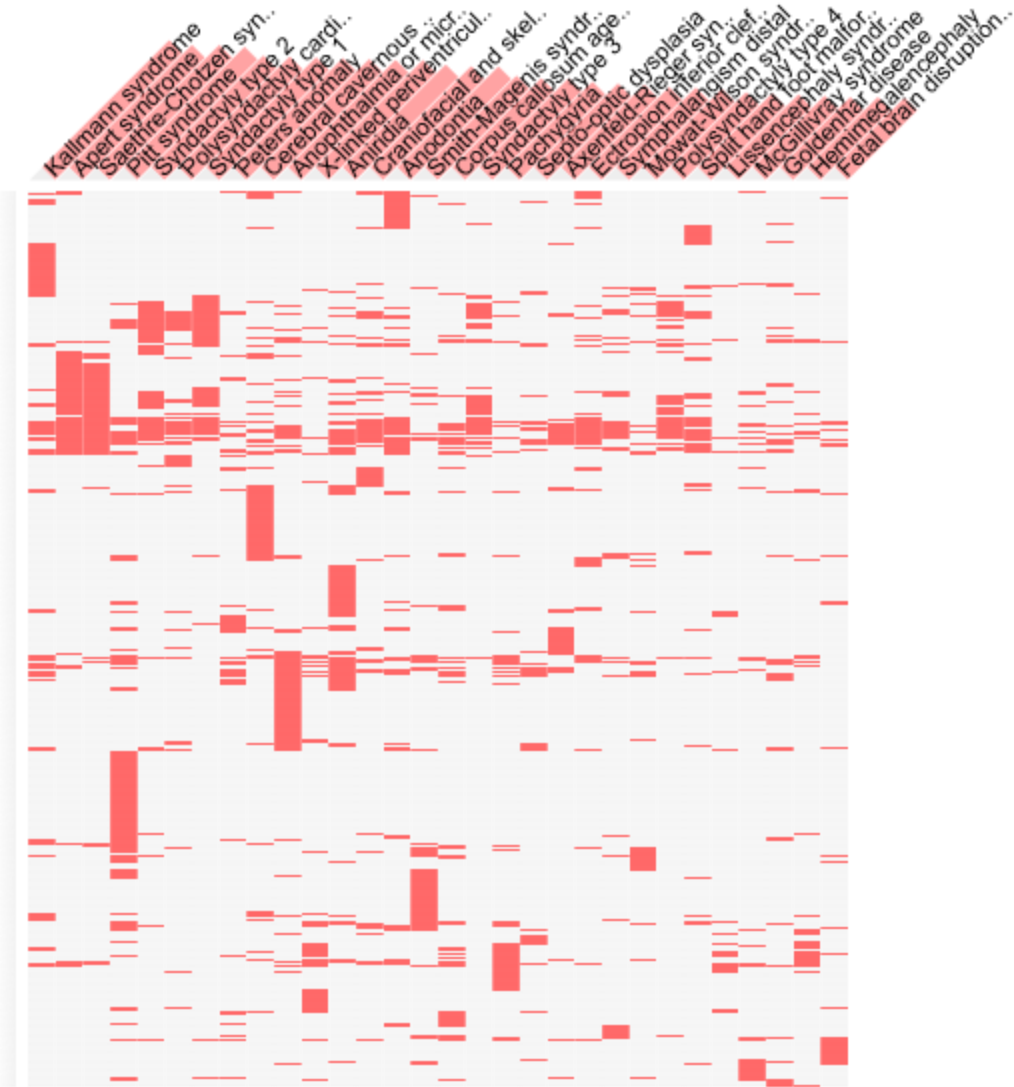

Supplement: 10577_2020_9639_MOESM5_ESM.pdf [file 10577_2020_9639_MOESM5_ESM.pdf]
