# Supplementary material
Source: PubMed Central journal article supplement (PMC7480002)

The principal element of our analytical approach is to define specific sets of genomic regulatory loci  
WITHOUT ANY PRIOR KNOWLEDGE  
of what genes (if any) they may (or may not) control.

This is in striking contrast with the approaches that being utilized in the prior art: to identify genes that are differentially regulated between different states and/or conditions, thus introducing the confounders and biases associated with the multiple hypothesis testing, overfitting, and random co-occurrence due to the very large excess of analyzed features (genes) over the relatively small numbers of samples (100K range or more of analyzed features versus just a few hundred analyzed samples at best). Attempts to address these issues using statistical approaches (corrections for multiple hypothesis testing) and experimental design improvements (multiple replications, validation in independent data sets and using independent analytical techniques) did not adequately resolve these problems.

Importantly, our analyses revealed that this approach identifies not only genes altered expression of which implicated in the broad spectrum of human physiological and pathological conditions. It also identifies genes defined by the independent studies as genetic loci comprising mutation signatures associated with development and progression of multiple common human disorders, including cancer, neurodevelopmental, neuropsychiatric, and neurodegenerative disorders, as well autoimmune and immuno-inflammatory diseases.

Supporting the concept that many major human disorders are driven by aberrant functions of primate-specific genomic regulatory networks with prominent unique-to-human (human-specific) components, this approach identifies genetic loci implicated in inter-individual genetic mosaicism (somatic mosaicism) of cells, tissues and organs in the human body.

# Analytical Pipelines

Define panels of genomic regulatory loci

Human-specific genomic regulatory sequences (HSGRS)

Human stem cell-associated retroviral sequences (SCARS)

Identify genes regulated by HSGRS

Identify genes regulated by SCARS

Heat-Map-Guided (HMG) visualization of gene and protein expression profiles  
*using databases of distinct types of human cells, tissues, anatomical sites, organs, physiological states, pathological conditions, as well as regulatory, chemical, and environmental perturbations*

Comparative gene set enrichment (CGSE) analyses of gene and protein expression profiles  
*using databases of distinct types of human cells, tissues, anatomical sites, organs, physiological states, pathological conditions, as well as regulatory, chemical, and environmental perturbations*

Asses the statistical significance of observations

Formulate the concepts regarding the potential roles and impacts of genomic regulatory networks governed by HSGRS and SCARS in human development, physiology, and pathology

# Analytical Pipelines

Define panels of genomic regulatory loci

Functional enhancers of naïve and primed hESC

Human stem cell-associated retroviral sequences (SCARS)

Identify genes regulated by HSGRS

Identify genes regulated by SCARS

Heat-Map-Guided (HMG) visualization of gene and protein expression profiles

*using databases of distinct types of human cells, tissues, anatomical sites, organs, physiological states, pathological conditions, as well as regulatory, chemical, and environmental perturbations*

Comparative gene set enrichment (CGSE) analyses of gene and protein expression profiles

*using databases of distinct types of human cells, tissues, anatomical sites, organs, physiological states, pathological conditions, as well as regulatory, chemical, and environmental perturbations*

Asses the statistical significance of observations

Formulate the concepts regarding the potential roles and impacts of genomic regulatory networks governed by HSGRS and SCARS in human development, physiology, and pathology

# Analytical Pipelines

Define panels of genomic regulatory loci

Functional enhancers of naïve and primed hESC

Human-specific genomic regulatory sequences (HSGRS)

Identify genes regulated by HSGRS

Identify genes regulated by SCARS

Heat-Map-Guided (HMG) visualization of gene and protein expression profiles

*using databases of distinct types of human cells, tissues, anatomical sites, organs, physiological states, pathological conditions, as well as regulatory, chemical, and environmental perturbations*

Comparative gene set enrichment (CGSE) analyses of gene and protein expression profiles

*using databases of distinct types of human cells, tissues, anatomical sites, organs, physiological states, pathological conditions, as well as regulatory, chemical, and environmental perturbations*

Asses the statistical significance of observations

Formulate the concepts regarding the potential roles and impacts of genomic regulatory networks governed by HSGRS and SCARS in human development, physiology, and pathology

- **MERGE THE RESULTS OF THE ANALYSES TO EXPLORE THE CONTRIBUTION OF SCARS TO FUNCTIONS OF HUMAN-SPECIFIC GENOMIC REGULATORY NETWORKS IN HUMAN DEVELOPMENT AS WELL AS HEALTH AND DISEASE STATES**
- **IDENTIFY THE HIGH-VALUE GENETIC TARGETS FOR MECHANISTIC AND FUNCTIONAL STUDIES IN THE EXPERIMENTAL MODELS OF HUMAN NEUROGENESIS AND CORTICOGENESIS**

# 59K human-specific regulatory sequences

Analysis of genes representing the putative regulatory targets of human-specific regulatory sequences

**Structurally, functionally, and evolutionary distinct families of human-specific regulatory sequences (HSRS) and associated putative regulatory target genes defined by the GREAT algorithm.**

| <b>Classification category/Reference database</b>                               | <b>Number of records (hg19)</b> | <b>Associated genes</b> |
|---------------------------------------------------------------------------------|---------------------------------|-------------------------|
| <b>Fixed human-specific insertions.</b>                                         | <b>11878</b>                    | <b>7979</b>             |
| <b>Human-specific TE loci expressed in human dorsolateral prefrontal cortex</b> | <b>4637</b>                     | <b>4051</b>             |
| <b>Set of duplicated regions in GRCh38 space</b>                                | <b>7599</b>                     | <b>6618</b>             |
| <b>Fixed human-specific deletions</b>                                           | <b>5883</b>                     | <b>5489</b>             |
| <b>Human-specific STR expansions</b>                                            | <b>4875</b>                     | <b>4844</b>             |
| <b>hsTFBS</b>                                                                   | <b>3803</b>                     | <b>1087</b>             |
| <b>ace-DHS</b>                                                                  | <b>3538</b>                     | <b>3445</b>             |
| <b>FHSRR</b>                                                                    | <b>4249</b>                     | <b>2810</b>             |
| <b>Human-specific STR contractions</b>                                          | <b>1279</b>                     | <b>973</b>              |
| <b>hESC_FHSRR_DHS</b>                                                           | <b>1932</b>                     | <b>1458</b>             |
| <b>DHS_FHSRR (non-hESC)</b>                                                     | <b>2118</b>                     | <b>552</b>              |
| <b>HARs</b>                                                                     | <b>2745</b>                     | <b>2281</b>             |
| <b>haDHS</b>                                                                    | <b>524</b>                      | <b>747</b>              |
| <b>Human-biased CNCC enhances</b>                                               | <b>1000</b>                     | <b>1439</b>             |
| <b>Chimp-biased CNCC enhances</b>                                               | <b>1000</b>                     | <b>1445</b>             |
| <b>H3K4me3 peaks with human-specific enrichment in prefrontal neurons</b>       | <b>410</b>                      | <b>578</b>              |
| <b>Human-specific hESC functional enhancers</b>                                 | <b>1619</b>                     | <b>1214</b>             |
| <b>All HSRS</b>                                                                 | <b>59089</b>                    | <b>13824</b>            |

Legend: Definitions of structurally, functionally, and evolutionary distinct families of human-specific regulatory sequences (HSRS) can be found in Glinsky (2020);

Figure 1. Heat-Map-Guided Visualization (HMGV) analysis of expression profiles of mRNAs encoded by 90 genes associated with human-specific genomic regulatory loci derived from transcriptionally active in human dorsolateral prefrontal cortex (DLPFC) transposable elements (A; B; E) and mRNAs encoded by 326 genes associated with human-specific genomic regulatory loci derived from fixed human-specific insertions (C; D; F). Results of the HMGV analysis employing the following databases are shown: HPA Human Tissues' Gene Expression Profiles (A; C); GTEx Human Tissues' Gene Expression Profiles (B; D); BioGPS Human Cell Type and Tissue Gene Expression Profiles (E; F). In (A; B; C; E; F), tissues (columns) are sorted by the rank order function from left to right; genes (rows) are sorted by the cluster order function from top to bottom. In (D), both columns and rows are sorted by the cluster order function.



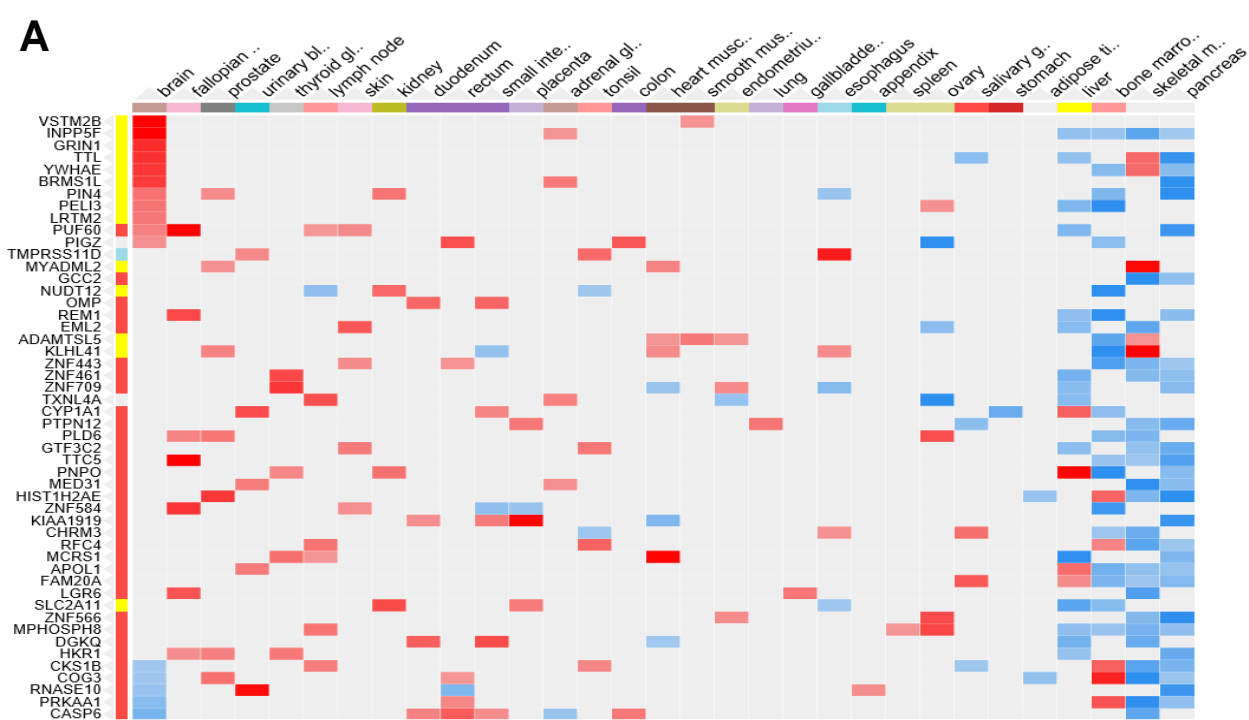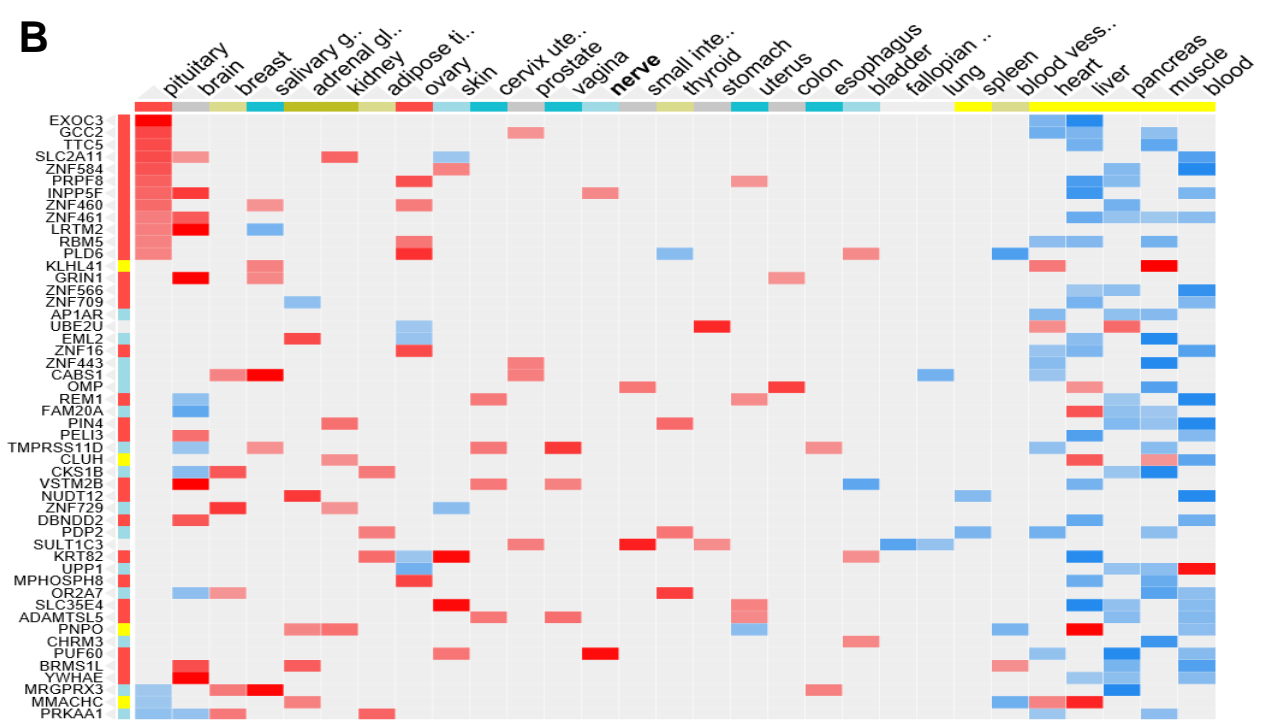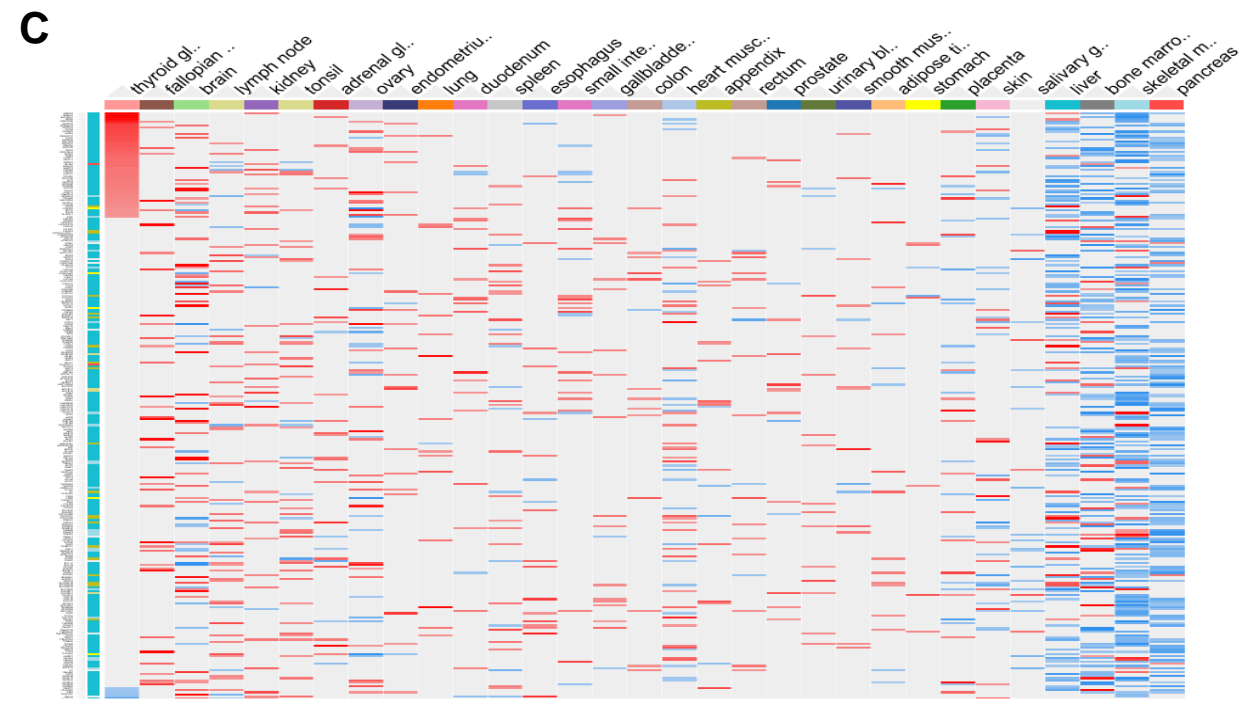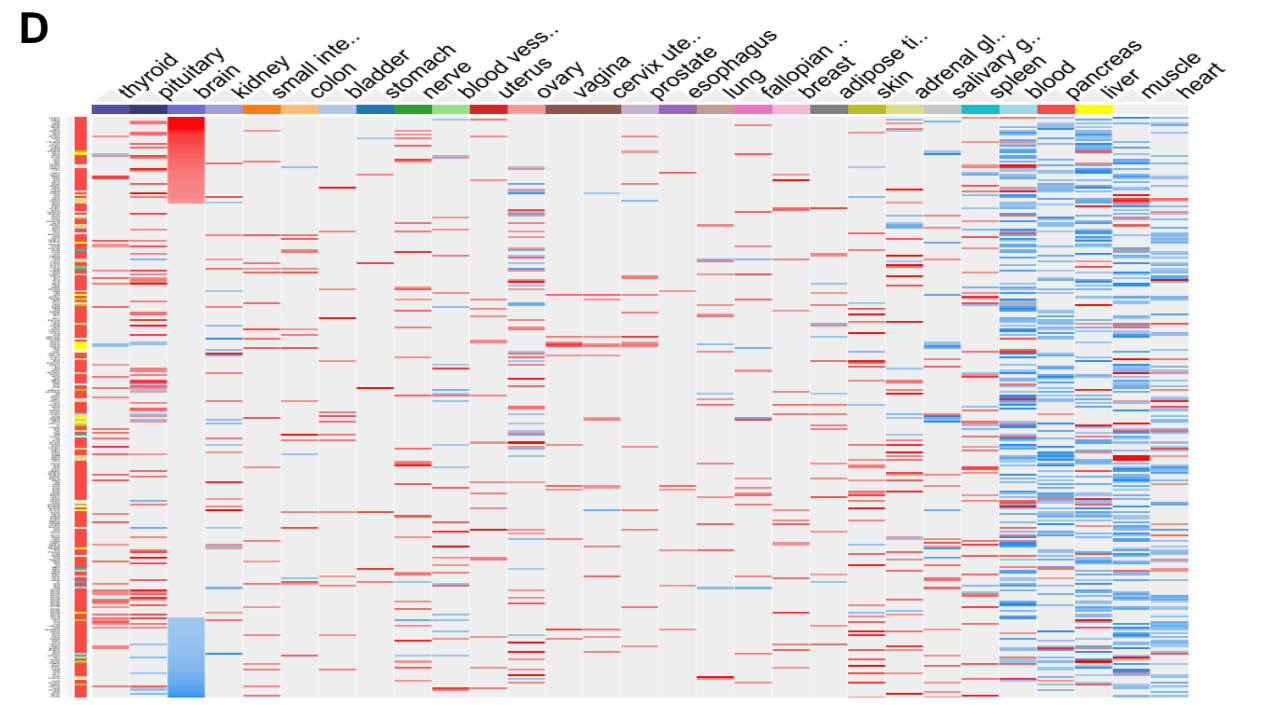



HeatMaps Visualization of expression profiles of mRNAs  
encoded by 90 genes associated with human-specific genomic  
regulatory loci derived from transcriptionally active in human  
DLPFC transposable elements

# HPA Human Tissues' Gene Expression Profiles

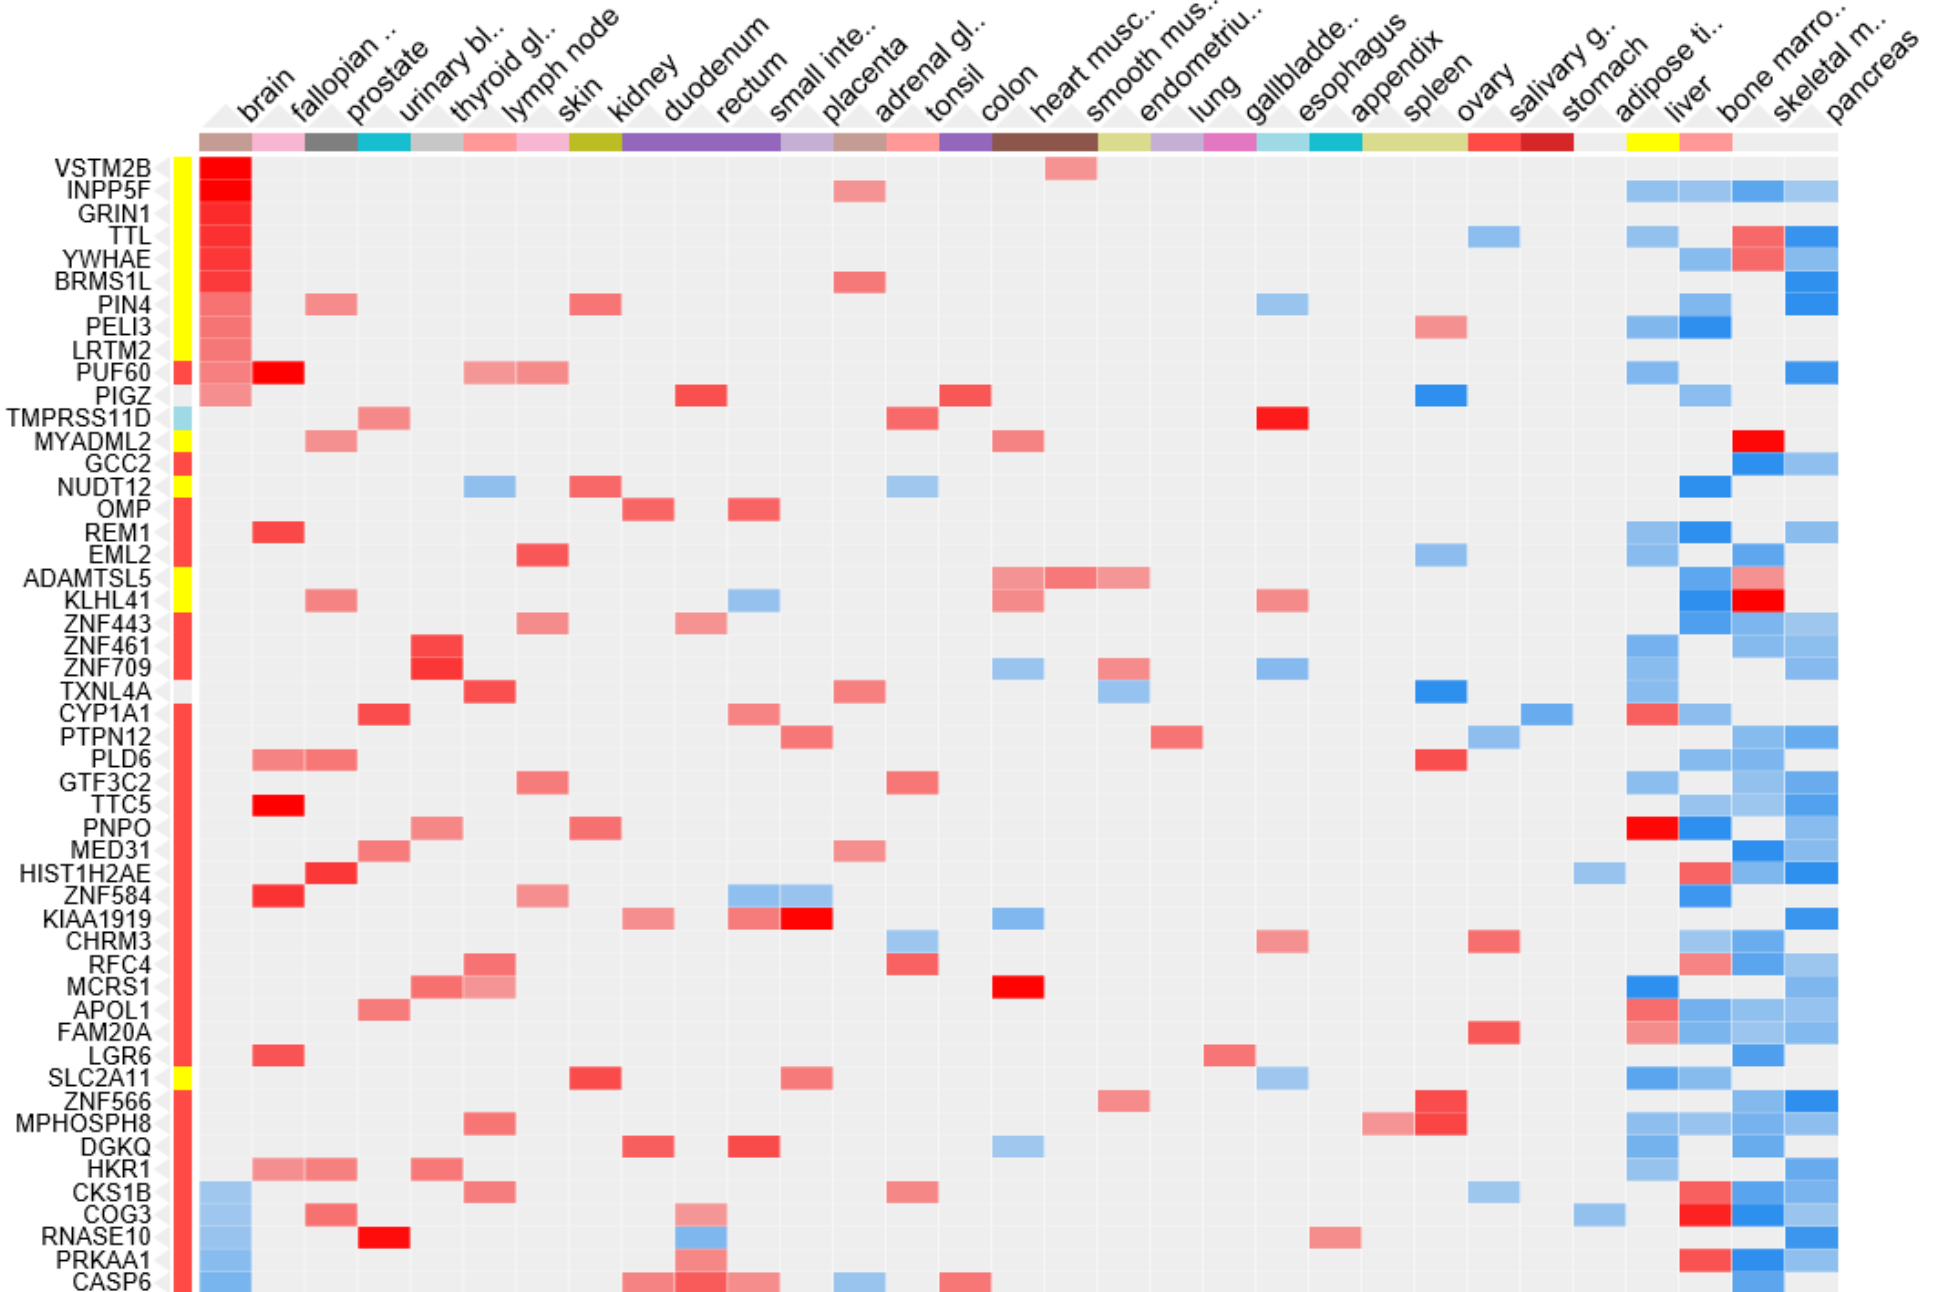

hsTE\_DLPFC\_1kb  
90 genes  
top 50 targets

# GTEx Human Tissues' Gene Expression Profiles

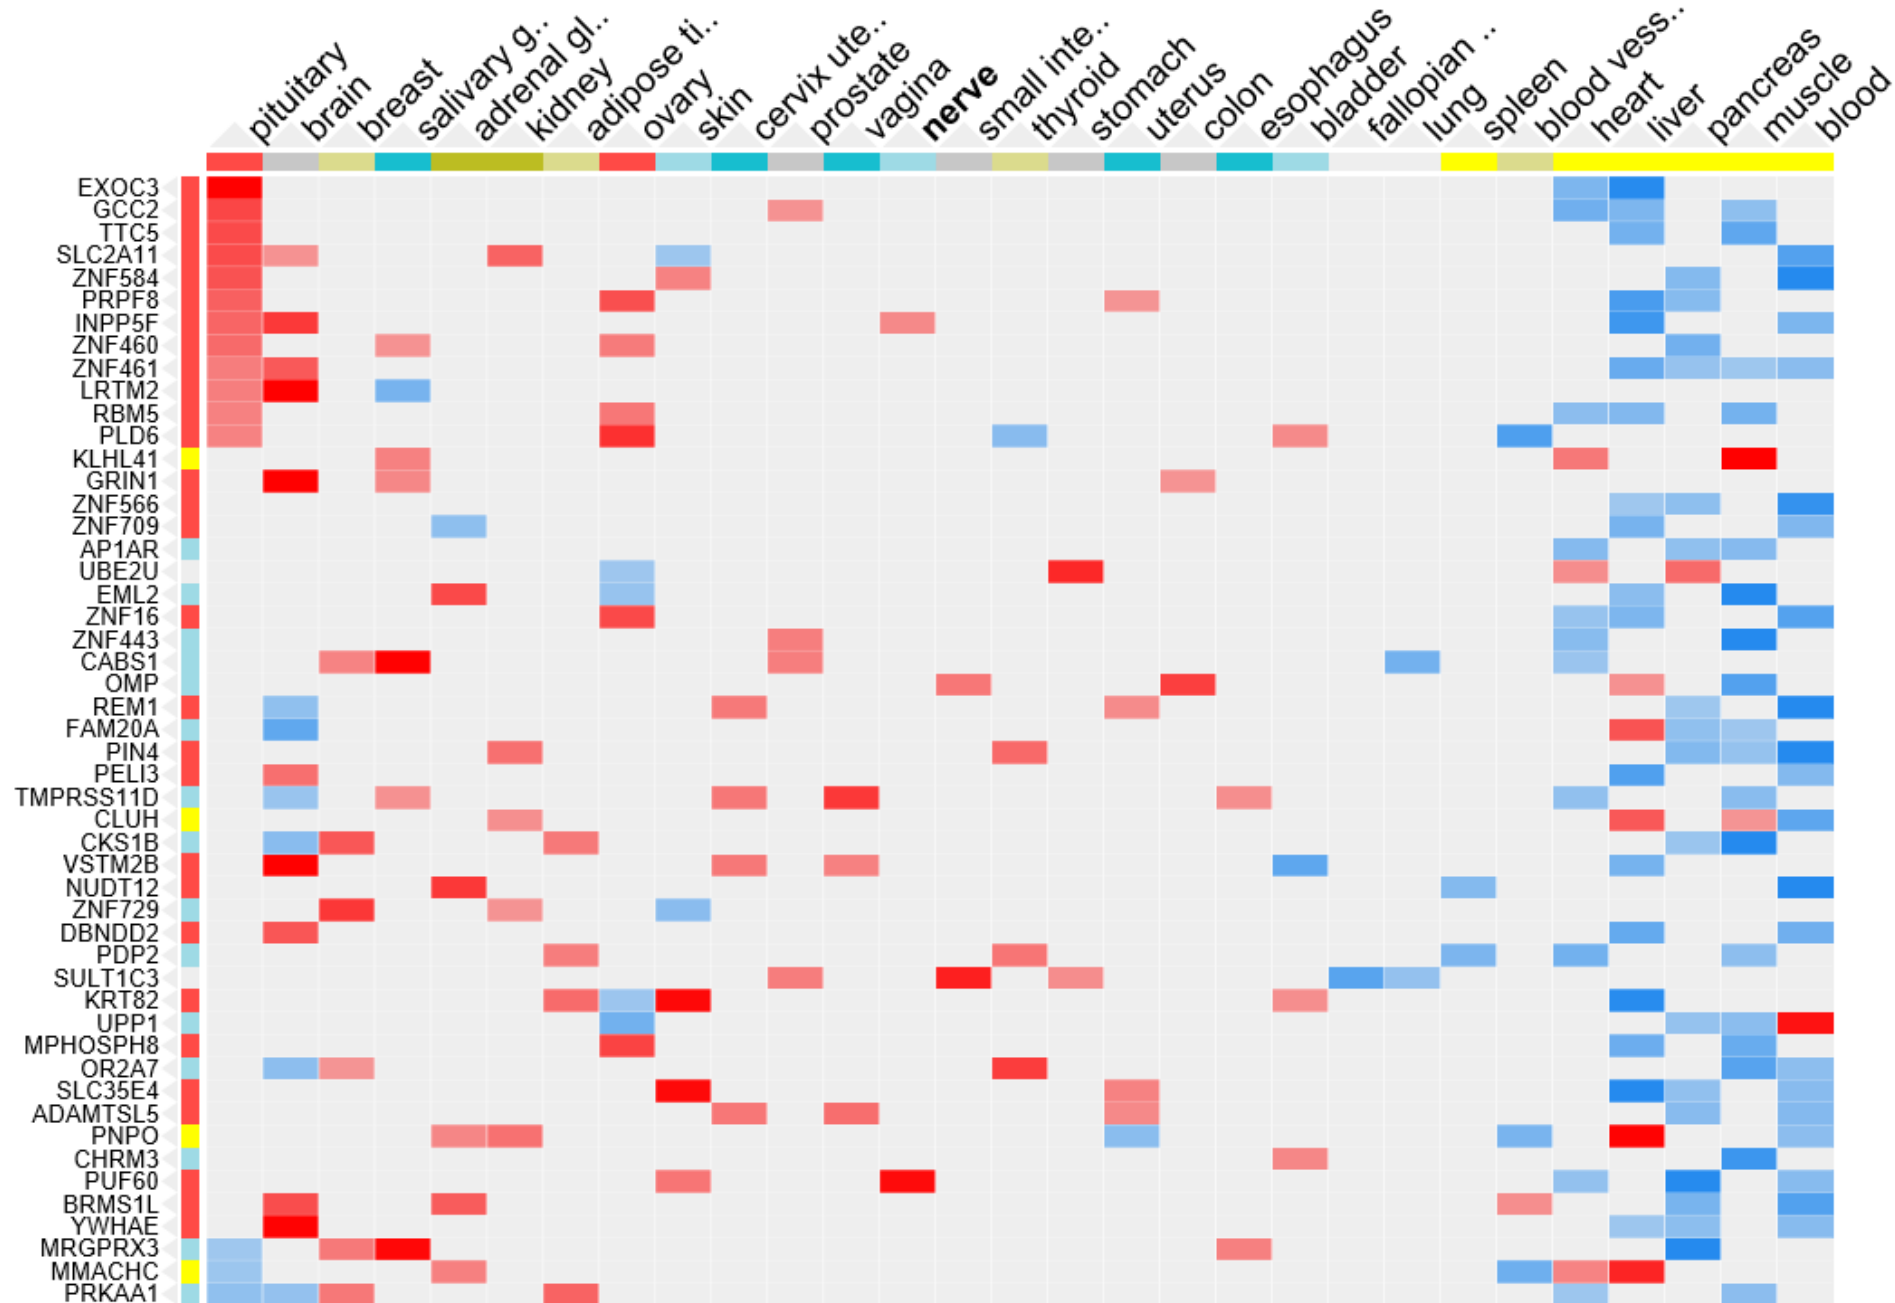

hsTE\_DLPFC\_1kb  
 90 genes  
 top 50 targets

HeatMaps Visualization of expression profiles of mRNAs encoded by 326 genes associated with human-specific genomic regulatory loci derived from fixed human-specific insertions

# HPA Human Tissues' Gene Expression Profiles

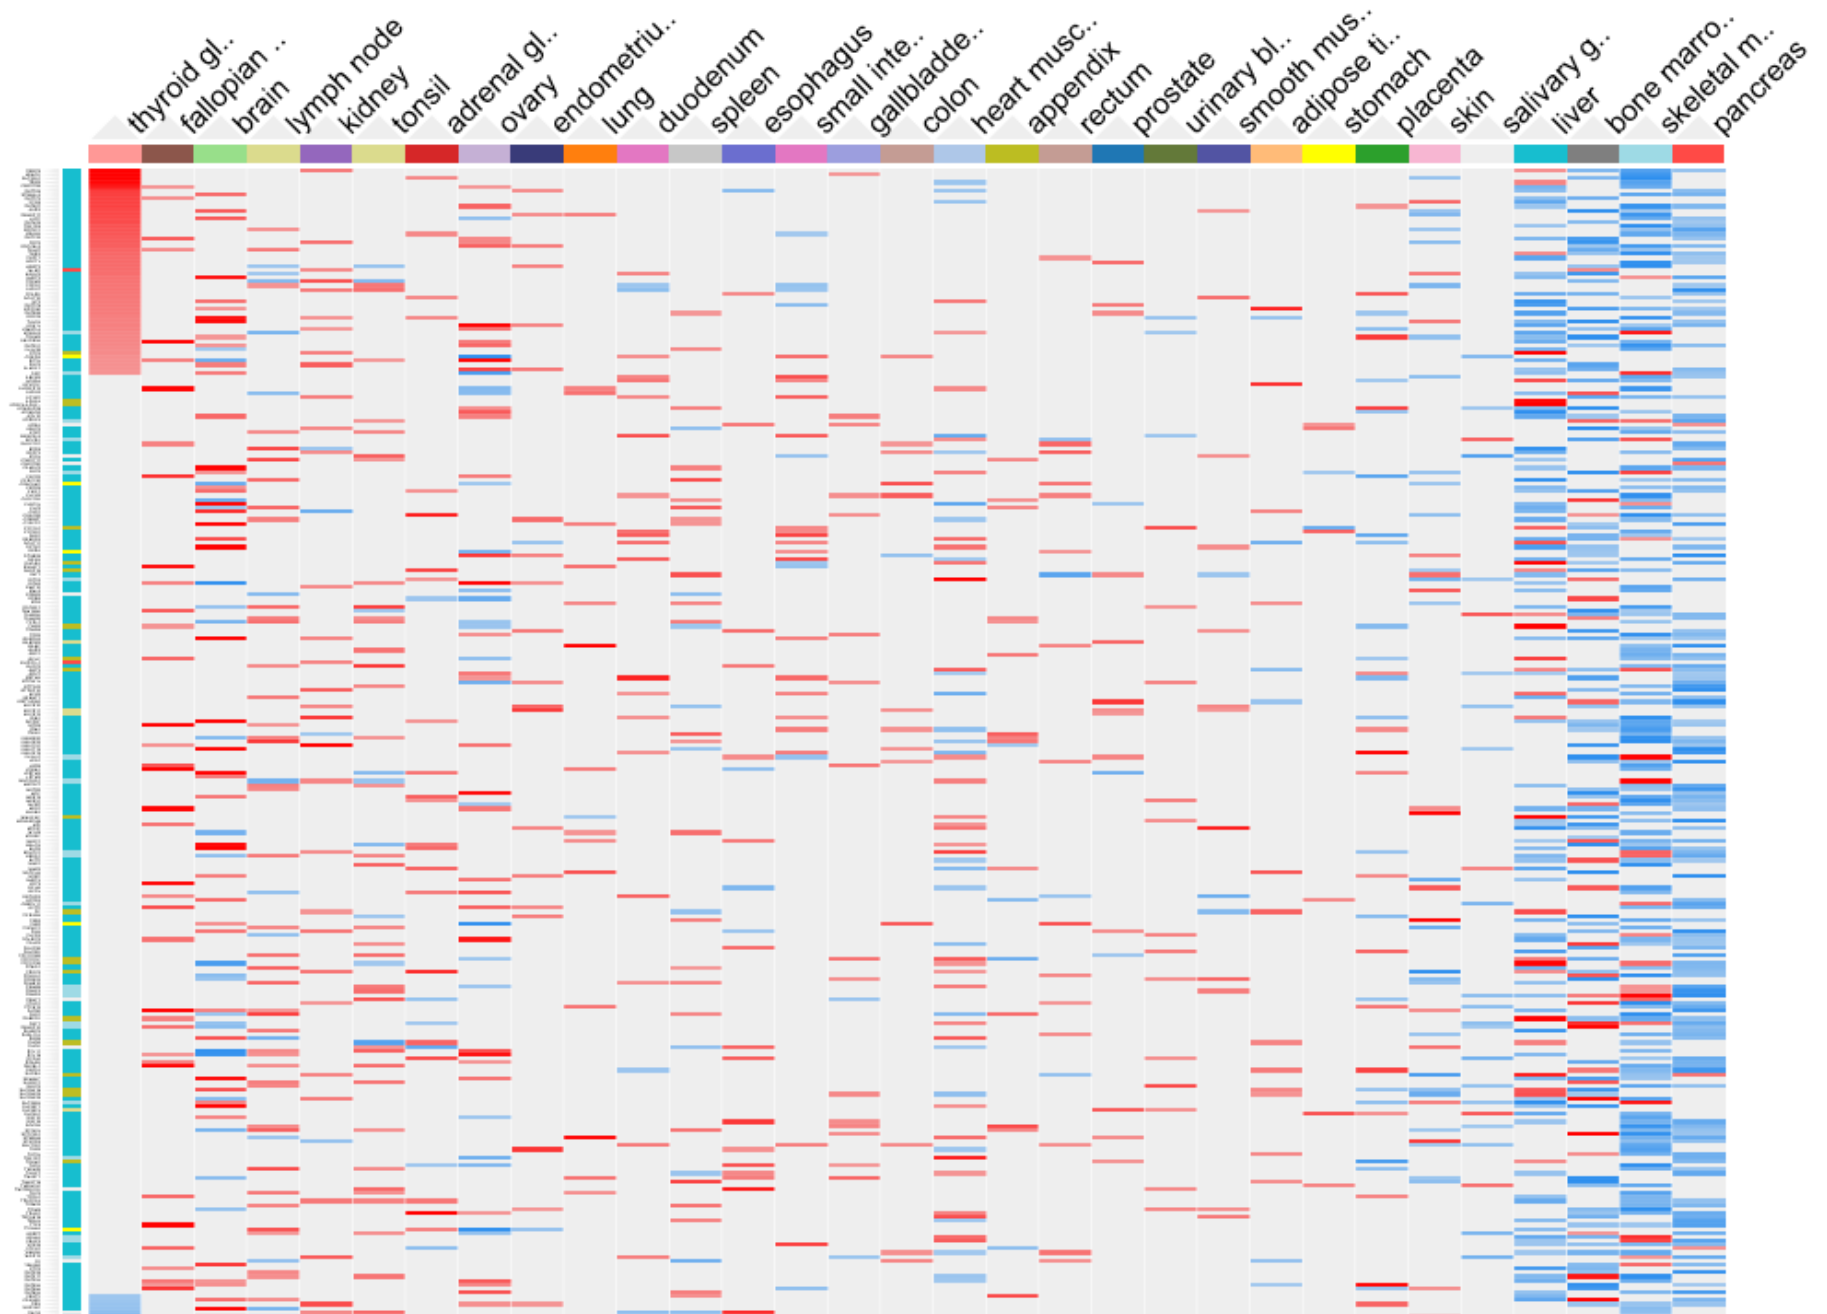

Fixed\_hs\_Insertions  
1kb\_326 genes  
All targets

# GTEx Human Tissues' Gene Expression Profiles

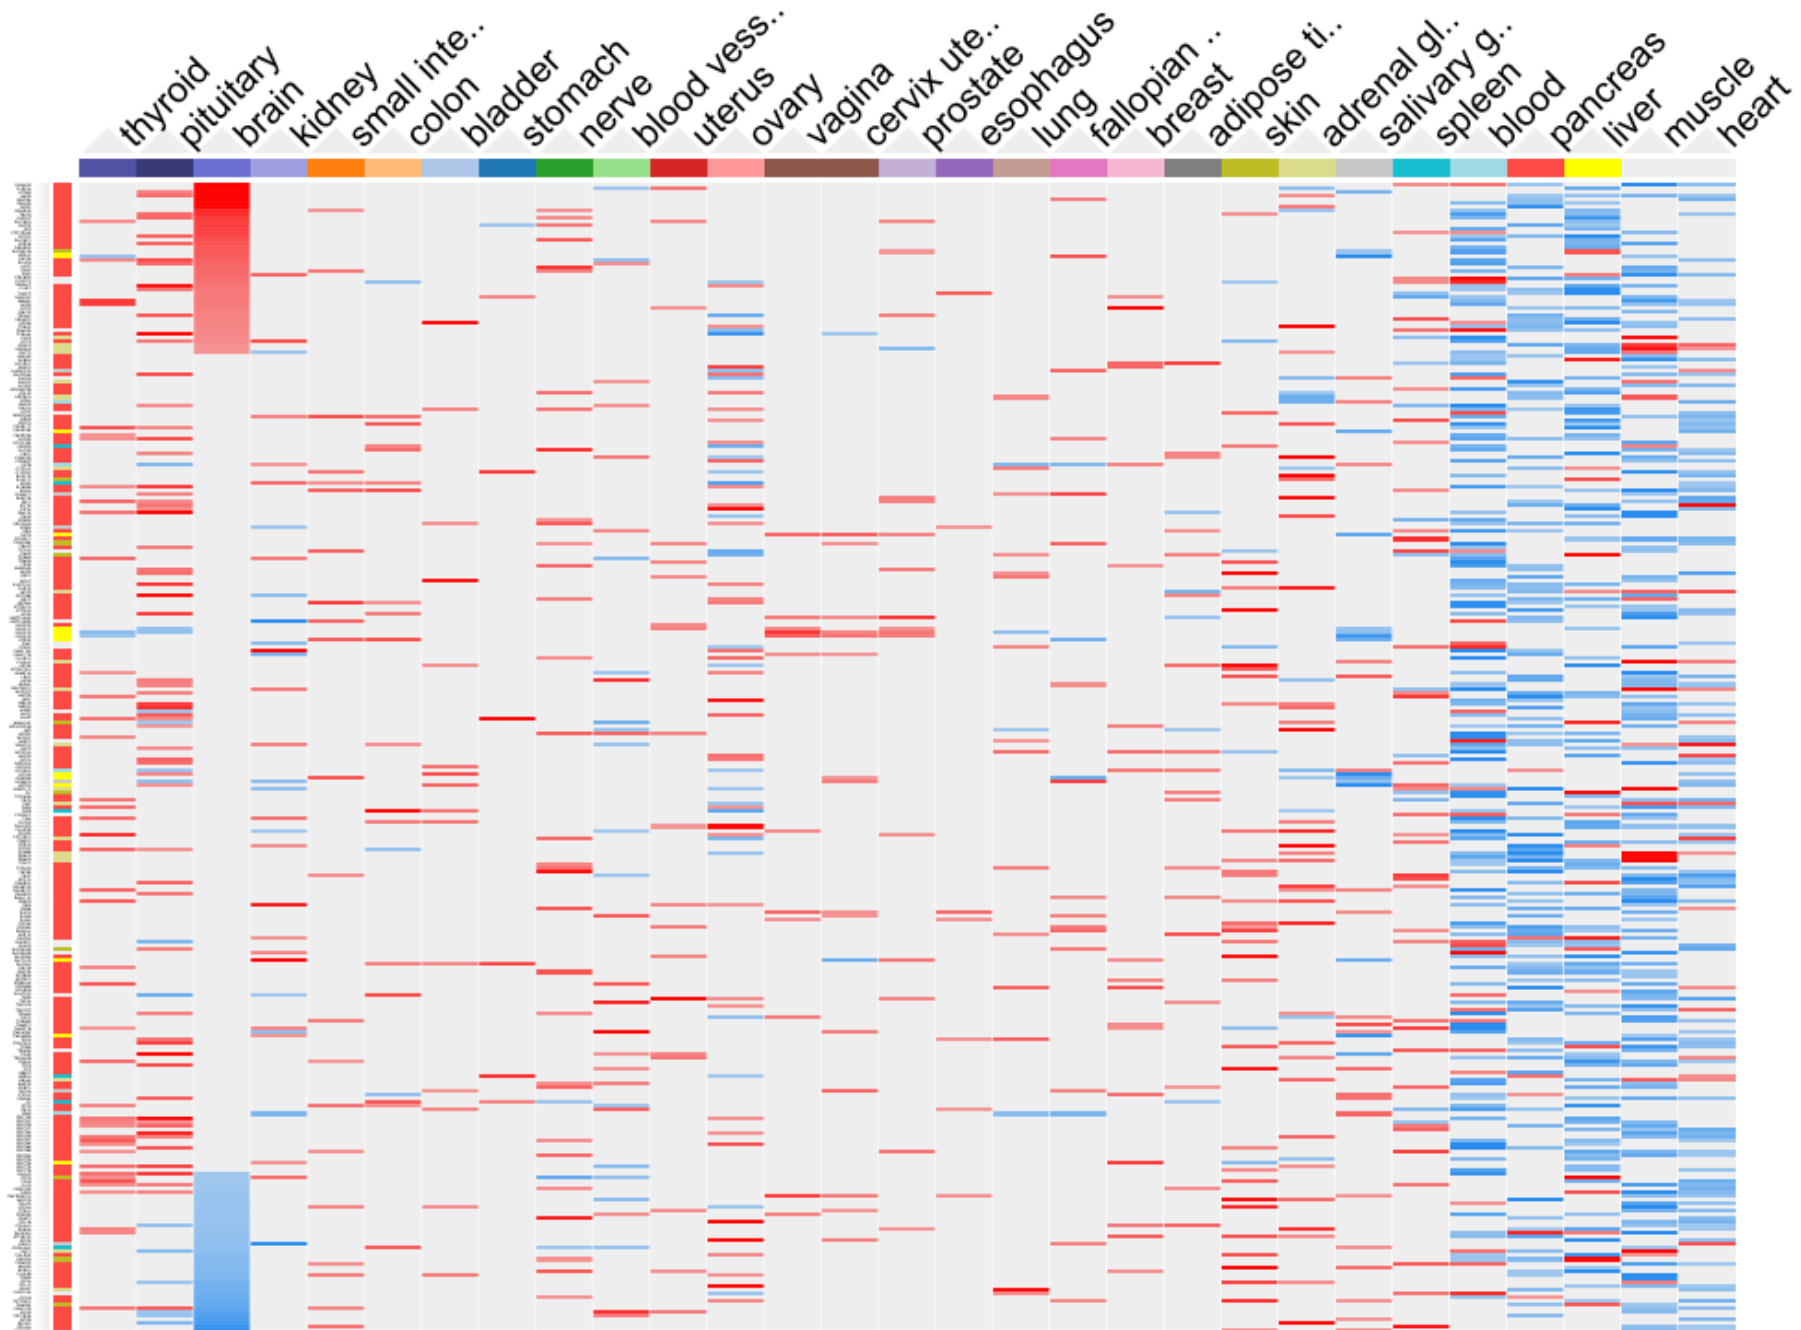



# GTEx Human Tissues' Gene Expression Profiles

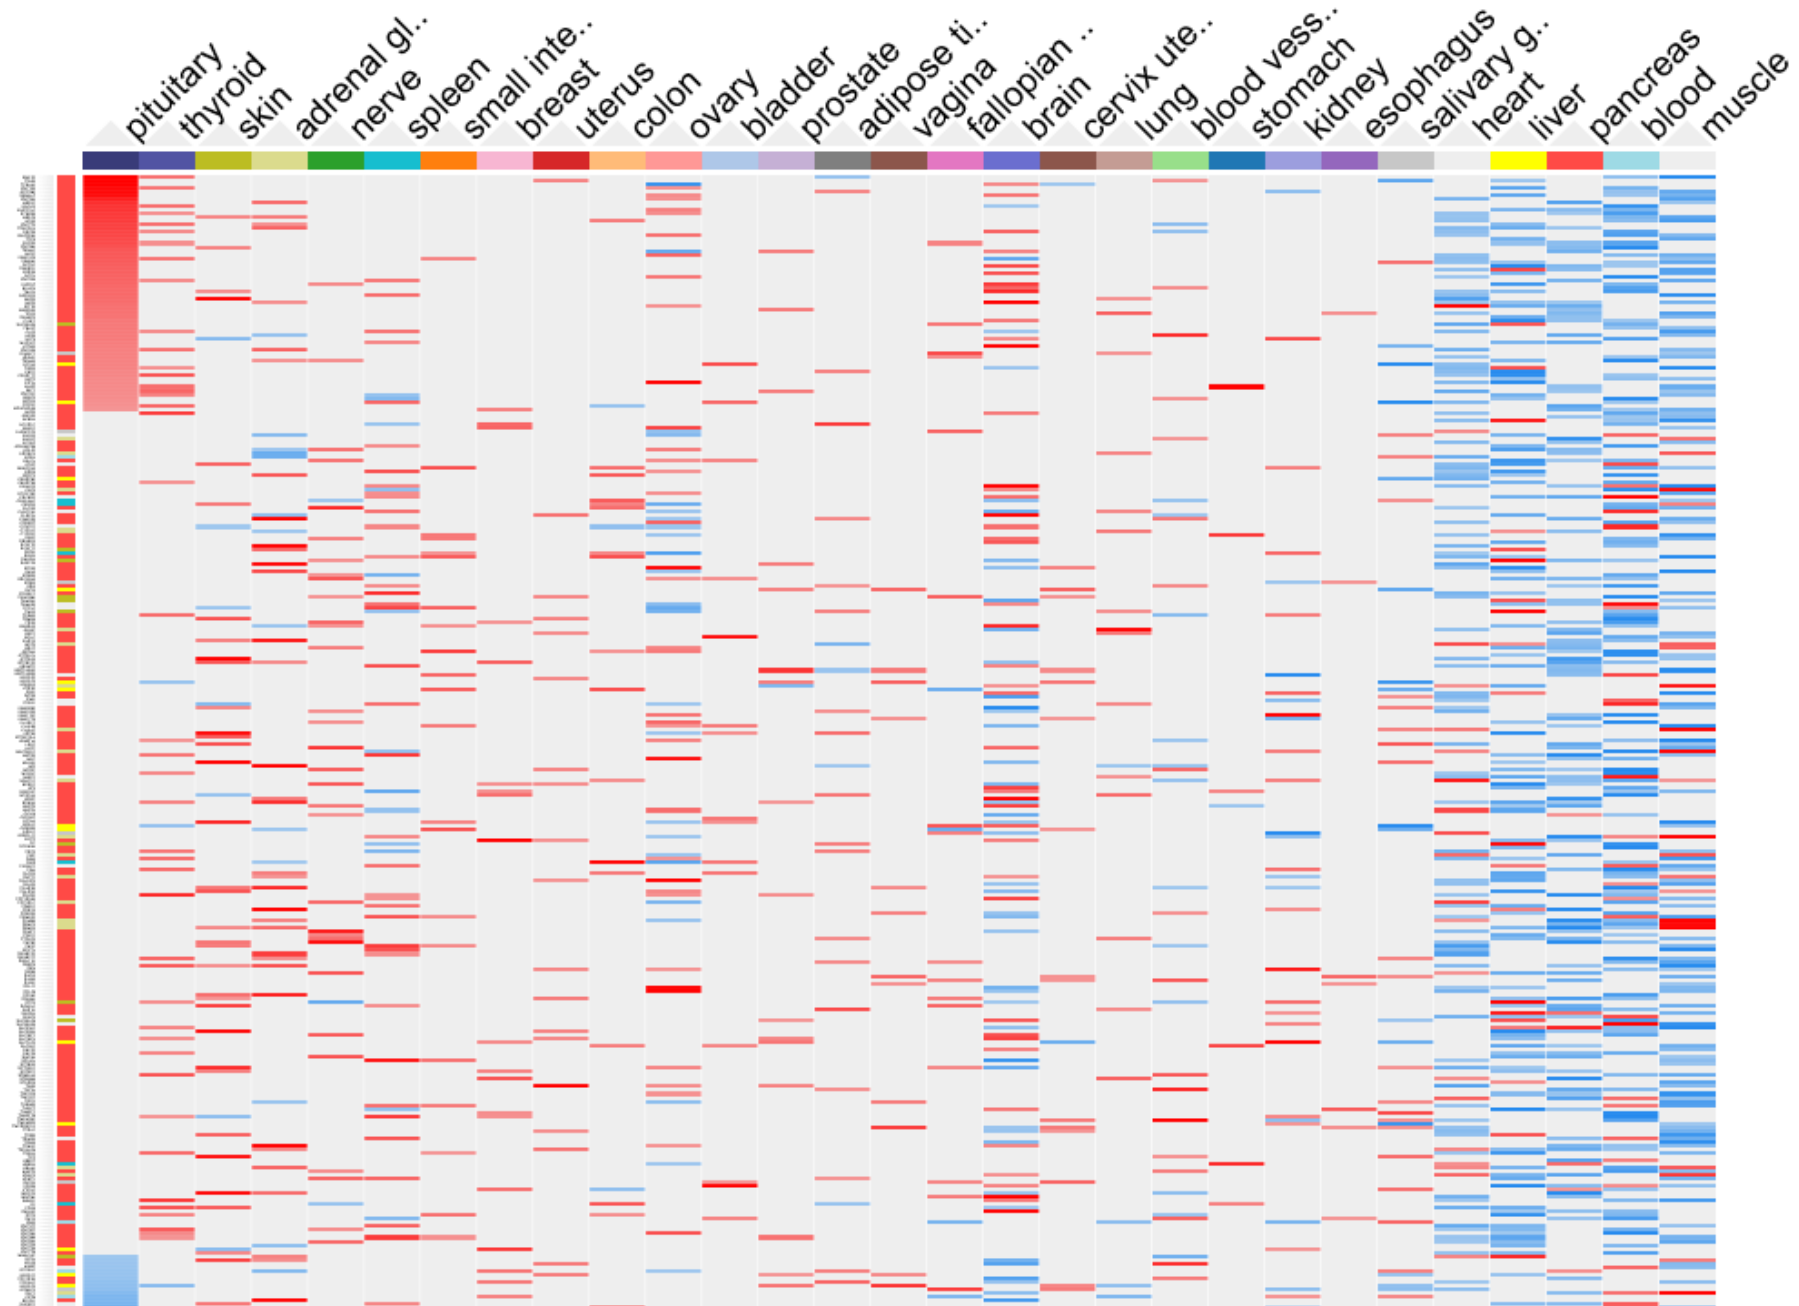



# BioGPS Human Cell Type and Tissue Gene Expression Profiles

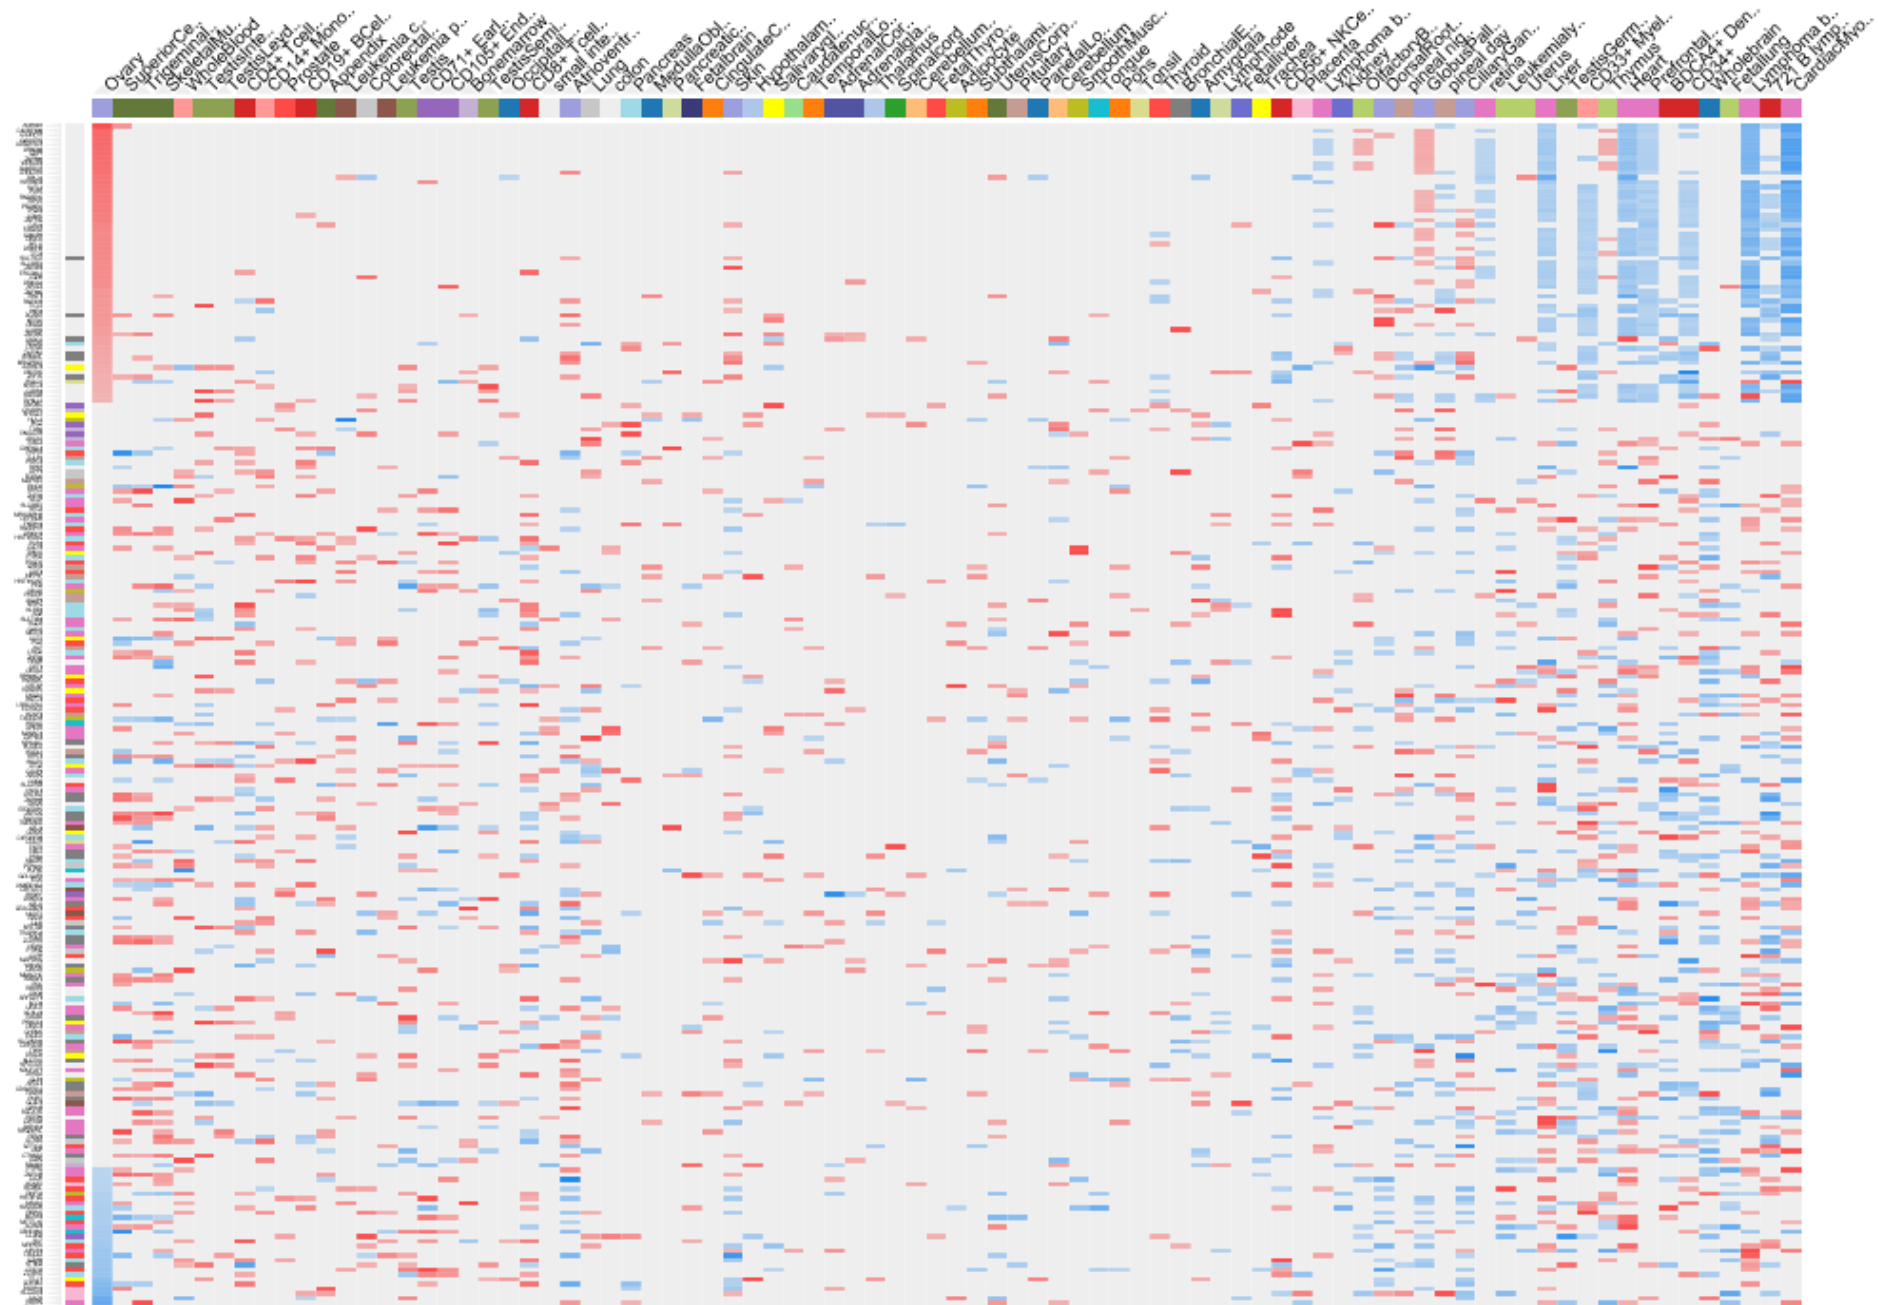

**11,878 fixed human-specific insertions**

# 11,878 fixed human-specific insertions

## ARCHS4 Tissues 5986 genes

|                     |                                               |
|---------------------|-----------------------------------------------|
| NEURONAL EPITHELIUM | p-value: 9.08E-13; Adjusted p-value: 4.9E-11  |
| PREFRONTAL CORTEX   | p-value: 9.08E-13; Adjusted p-value: 4.9E-11  |
| SPINAL CORD         | p-value: 9.78E-06; Adjusted p-value: 0.000264 |
| SPINAL CORD (BULK)  | p-value: 9.78E-06; Adjusted p-value: 0.000264 |
| CINGULATE GYRUS     | p-value: 4.1E-05; Adjusted p-value: 0.000886  |
| CEREBELLUM          | p-value: 0.000129; Adjusted p-value: 0.000129 |
| FETAL BRAIN CORTEX  | p-value: 0.00191; Adjusted p-value: 0.0294    |
| HUMAN EMBRYO        | p-value: 0.00257; Adjusted p-value: 0.0347    |
| MOTOR NEURON        | p-value: 0.006; Adjusted p-value: 0.0648      |
| CEREBRAL CORTEX     | p-value: 0.006; Adjusted p-value: 0.0648      |

## ARCHS4 Tissues 7979 genes

|                     |                                                 |
|---------------------|-------------------------------------------------|
| PREFRONTAL CORTEX   | p-value: 1.366E-47; Adjusted p-value: 1.475E-45 |
| NEURONAL EPITHELIUM | p-value: 2.549E-37; Adjusted p-value: 1.377E-35 |
| SPINAL CORD         | p-value: 7.582E-24; Adjusted p-value: 2.047E-22 |
| SPINAL CORD (BULK)  | p-value: 7.582E-24; Adjusted p-value: 2.047E-22 |
| CEREBELLUM          | p-value: 1.084E-22; Adjusted p-value: 2.34E-21  |
| CINGULATE GYRUS     | p-value: 2.711E-20; Adjusted p-value: 4.879E-19 |
| CEREBRAL CORTEX     | p-value: 1.517E-14; Adjusted p-value: 2.341E-13 |
| RENAL CORTEX        | p-value: 1.61E-13; Adjusted p-value: 2.173E-12  |
| MOTOR NEURON        | p-value: 1.363E-11; Adjusted p-value: 1.636E-10 |
| BRAIN (BULK)        | p-value: 1.041E-09; Adjusted p-value: 1.124E-08 |

## Jensen TISSUES 5986 genes

|                 |                                                  |
|-----------------|--------------------------------------------------|
| Hypothalamus    | p-value: 4.717e-72; Adjusted p-value: 8.250e-69  |
| Brain           | p-value: 5.633e-42; Adjusted p-value: 3.794e-39  |
| Adipose_tissue  | p-value: 6.507e-42; Adjusted p-value: 3.794e-39  |
| Heart           | p-value: 1.215e-37; Adjusted p-value: 5.312e-35  |
| Cerebral_cortex | p-value: 4.898e-37; Adjusted p-value: 1.713e-34  |
| Lung            | p-value: 2.896e-34; Adjusted p-value: 8.443e-32  |
| Retina          | p-value: 3.7298E-32; Adjusted p-value: 9.319E-30 |
| Adrenal_gland   | p-value: 1.047E-30; Adjusted p-value: 2.289E-28  |
| Uterus          | p-value: 1.304E-30; Adjusted p-value: 2.45E-28   |
| Colon           | p-value: 1.401E-30; Adjusted p-value: 2.45E-28   |

## Jensen TISSUES 7979 genes

|                 |                                                   |
|-----------------|---------------------------------------------------|
| Hypothalamus    | p-value: 4.198E-121; Adjusted p-value: 7.539E-118 |
| Brain           | p-value: 3.733E-74; Adjusted p-value: 3.352E-71   |
| Cerebral_cortex | p-value: 8.295E-66; Adjusted p-value: 4.966E-63   |
| Heart           | p-value: 5.120E-58; Adjusted p-value: 2.299E-55   |
| Lung            | p-value: 7.403E-52; Adjusted p-value: 2.659E-49   |
| Adipose_tissue  | p-value: 2.312E-51; Adjusted p-value: 6.922E-49   |
| Adrenal_gland   | p-value: 8.1997E-51; Adjusted p-value: 2.104E-48  |
| Gall_bladder    | p-value: 1.1196E-48; Adjusted p-value: 2.513E-46  |
| Colon           | p-value: 2.1855E-48; Adjusted p-value: 4.361E-46  |
| Kidney          | p-value: 9.6324E-48; Adjusted p-value: 1.73E-45   |

# 11,878 fixed human-specific insertions

## Jensen DISEASES 5986 genes

|                            |                                                 |
|----------------------------|-------------------------------------------------|
| Carcinoma                  | p-value: 4.013e-91; Adjusted p-value: 6.915e-88 |
| Kidney_cancer              | p-value: 1.840e-46; Adjusted p-value: 1.585e-43 |
| Skin_cancer                | p-value: 8.144e-18; Adjusted p-value: 4.677e-15 |
| Liver_cancer               | p-value: 4.892e-14; Adjusted p-value: 2.107e-11 |
| Acquired_metabolic_disease | p-value: 7.149e-14; Adjusted p-value: 2.464e-11 |
| Melanoma                   | p-value: 3.929e-13; Adjusted p-value: 1.128e-10 |
| Breast_cancer              | p-value: 3.039E-09; Adjusted p-value: 7.48E-07  |
| Pancreatic_cancer          | p-value: 9.105E-09; Adjusted p-value: 1.961E-06 |
| Type_2_diabetes_mellitus   | p-value: 1.379E-08; Adjusted p-value: 2.64E-06  |
| Lung_cancer                | p-value: 4.953E-08; Adjusted p-value: 8.534E-06 |

## Jensen DISEASES 7979 genes

|                            |                                                   |
|----------------------------|---------------------------------------------------|
| Carcinoma                  | p-value: 1.590e-165; Adjusted p-value: 2.826e-162 |
| Kidney_cancer              | p-value: 1.353e-119; Adjusted p-value: 1.202e-116 |
| Liver_cancer               | p-value: 2.316e-49; Adjusted p-value: 1.372e-46   |
| Skin_cancer                | p-value: 1.909e-39; Adjusted p-value: 8.480e-37   |
| Melanoma                   | p-value: 1.836e-35; Adjusted p-value: 6.527e-33   |
| Acquired_metabolic_disease | p-value: 1.749e-31; Adjusted p-value: 5.180e-29   |
| Breast_cancer              | p-value: 1.948E-28; Adjusted p-value: 4.944E-26   |
| Type_2_diabetes_mellitus   | p-value: 1.811E-21; Adjusted p-value: 4.023E-19   |
| Lung_cancer                | p-value: 2.755E-18; Adjusted p-value: 5.439E-16   |
| Pancreatic_cancer          | p-value: 1.847E-16; Adjusted p-value: 3.283E-14   |

## Disease Perturbations from GEO down 5986 genes

|                                                                       | P-value     | Adjusted p-value |
|-----------------------------------------------------------------------|-------------|------------------|
| Bipolar Disorder C0005586 human GSE5389 sample 302                    | 1.72813E-08 | 1.4499E-05       |
| adrenoleukodystrophy DOID-10588 human GSE34309 sample 864             | 3.85054E-08 | 1.6153E-05       |
| Primary open angle glaucoma C0339573 human GSE2705 sample 257         | 8.1833E-08  | 2.1431E-05       |
| ulcerative colitis DOID-8577 human GSE6731 sample 759                 | 1.02175E-07 | 2.1431E-05       |
| schizophrenia DOID-5419 human GSE25673 sample 892                     | 6.20235E-07 | 0.00010407       |
| Breast Cancer C0006142 human GSE1378 sample 52                        | 2.41773E-06 | 0.00032648       |
| Crohn's disease DOID-8778 human GSE6731 sample 757                    | 2.72388E-06 | 0.00032648       |
| esophagus squamous cell carcinoma DOID-3748 human GSE63941 sample 659 | 6.02921E-06 | 0.00056206       |
| idiopathic pulmonary fibrosis DOID-0050156 human GSE44723 sample 850  | 5.3956E-06  | 0.00056206       |
| cardiomyopathy DOID-0050700 human GSE9128 sample 781                  | 7.05452E-06 | 0.00059188       |

## Disease Perturbations from GEO down 7979 genes

|                                                                      | P-value     | Adjusted p-value |
|----------------------------------------------------------------------|-------------|------------------|
| schizophrenia DOID-5419 human GSE25673 sample 892                    | 2.88873E-25 | 2.42364E-22      |
| Crohn's disease DOID-8778 human GSE6731 sample 757                   | 1.49323E-17 | 6.2641E-15       |
| Bipolar Disorder C0005586 human GSE5389 sample 302                   | 2.47601E-17 | 6.92457E-15      |
| adrenoleukodystrophy DOID-10588 human GSE34309 sample 864            | 7.75341E-17 | 1.62628E-14      |
| ulcerative colitis DOID-8577 human GSE6731 sample 759                | 2.15119E-16 | 3.60969E-14      |
| Primary open angle glaucoma C0339573 human GSE2705 sample 257        | 1.43072E-14 | 1.66042E-12      |
| Ulcerative Colitis C0009324 human GSE6731 sample 249                 | 1.58324E-14 | 1.66042E-12      |
| Idiopathic pulmonary fibrosis DOID-0050156 human GSE44723 sample 850 | 1.56279E-14 | 1.66042E-12      |
| Breast Cancer C0006142 human GSE1378 sample 52                       | 7.77714E-13 | 7.25002E-11      |
| Crohn's disease DOID-8778 human GSE6731 sample 758                   | 1.8143E-12  | 1.5222E-10       |



## 11,878 fixed human-specific insertions

### Disease Perturbations from GEO up 5986 genes

|                                                                      | P-value            | Adjusted p-value   |
|----------------------------------------------------------------------|--------------------|--------------------|
| cardiomyopathy DOID-0050700 human GSE9128 sample 780                 | <b>1.87765E-06</b> | <b>0.001446337</b> |
| schizophrenia DOID-5419 human GSE25673 sample 891                    | <b>3.44776E-06</b> | <b>0.001446337</b> |
| Spinal Muscular Atrophy C0026847 mouse GSE10599 sample 235           | <b>8.69631E-06</b> | <b>0.001889865</b> |
| idiopathic pulmonary fibrosis DOID-0050156 human GSE44723 sample 851 | <b>9.01008E-06</b> | <b>0.001889865</b> |
| Primary open angle glaucoma C0339573 human GSE2705 sample 257        | <b>3.83914E-05</b> | <b>0.006442083</b> |
| idiopathic urticaria DOID-1555 human GSE57178 sample 815             | <b>7.75193E-05</b> | <b>0.009776282</b> |
| Diamond-Blackfan anaemia DOID-1339 human GSE14335 sample 472         | <b>8.15661E-05</b> | <b>0.009776282</b> |
| Neurofibromatosis DOID-8712 mouse GSE1482 sample 667                 | <b>0.000103508</b> | <b>0.010653102</b> |
| schizophrenia DOID-5419 human GSE25673 sample 892                    | <b>0.000132556</b> | <b>0.010653102</b> |
| hepatitis C DOID-1883 human GSE20948 sample 598                      | <b>0.000139671</b> | <b>0.010653102</b> |

### ENCODE and ChEA Consensus TFs from ChIP-X 5986 genes

|             | P-value            | Adjusted p-value   |
|-------------|--------------------|--------------------|
| AR_CHEA     | <b>3.841E-28</b>   | <b>3.9946E-26</b>  |
| SUZ12_CHEA  | <b>1.09013E-22</b> | <b>5.66869E-21</b> |
| SMAD4_CHEA  | <b>3.08881E-18</b> | <b>1.07079E-16</b> |
| REST_CHEA   | <b>1.13969E-16</b> | <b>2.9632E-15</b>  |
| NFE2L2_CHEA | <b>9.57565E-14</b> | <b>1.99174E-12</b> |
| TP63_CHEA   | <b>3.48038E-10</b> | <b>6.03266E-09</b> |
| STAT3_CHEA  | <b>2.40449E-08</b> | <b>3.57239E-07</b> |
| GATA1_CHEA  | <b>1.41526E-07</b> | <b>1.48683E-06</b> |
| GATA2_CHEA  | <b>8.89814E-08</b> | <b>1.15676E-06</b> |
| SALL4_CHEA  | <b>1.42965E-07</b> | <b>1.48683E-06</b> |

### Disease Perturbations from GEO up 7979 genes

|                                                                      | P-value            | Adjusted p-value   |
|----------------------------------------------------------------------|--------------------|--------------------|
| schizophrenia DOID-5419 human GSE25673 sample 891                    | <b>1.8927E-19</b>  | <b>1.58798E-16</b> |
| Spinal Muscular Atrophy C0026847 mouse GSE10599 sample 235           | <b>5.92303E-18</b> | <b>2.48471E-15</b> |
| schizophrenia DOID-5419 human GSE25673 sample 892                    | <b>1.75756E-14</b> | <b>4.9153E-12</b>  |
| idiopathic pulmonary fibrosis DOID-0050156 human GSE44723 sample 850 | <b>5.0913E-13</b>  | <b>1.0679E-10</b>  |
| morbid obesity DOID-11981 human GSE48964 sample 583                  | <b>3.15E-11</b>    | <b>5.28055E-09</b> |
| idiopathic pulmonary fibrosis DOID-0050156 human GSE44723 sample 851 | <b>6.54233E-11</b> | <b>9.14836E-09</b> |
| Primary open angle glaucoma C0339573 human GSE2705 sample 257        | <b>8.55002E-10</b> | <b>1.02478E-07</b> |
| cardiomyopathy DOID-0050700 human GSE9128 sample 780                 | <b>3.23739E-09</b> | <b>3.39521E-07</b> |
| adrenoleukodystrophy DOID-10588 human GSE34309 sample 864            | <b>4.13498E-09</b> | <b>3.85472E-07</b> |
| Cardiomyopathy, Dilated C0007193 human GSE3585 sample 198            | <b>6.70904E-09</b> | <b>5.62888E-07</b> |

### ENCODE and ChEA Consensus TFs from ChIP-X 7979 genes

|             | P-value           | Adjusted p-value  |
|-------------|-------------------|-------------------|
| AR_CHEA     | <b>4.679E-85</b>  | <b>4.866E-83</b>  |
| SUZ12_CHEA  | <b>1.084E-80</b>  | <b>5.635E-79</b>  |
| SMAD4_CHEA  | <b>2.824E-61</b>  | <b>9.789E-60</b>  |
| NFE2L2_CHEA | <b>1.509E-60</b>  | <b>3.923E-59</b>  |
| REST_CHEA   | <b>7.5683E-41</b> | <b>1.5742E-39</b> |
| SOX2_CHEA   | <b>8.5218E-26</b> | <b>1.4771E-24</b> |
| TRIM28_CHEA | <b>2.2682E-22</b> | <b>3.3699E-21</b> |
| SALL4_CHEA  | <b>1.8672E-19</b> | <b>2.4274E-18</b> |
| GATA1_CHEA  | <b>6.2282E-19</b> | <b>7.1970E-18</b> |
| TP63_CHEA   | <b>1.3467E-17</b> | <b>1.2732E-16</b> |

# 11,878 fixed human-specific insertions

## ESCAPE 5986 genes

P-value Adjusted p-value

|                        |                    |                    |
|------------------------|--------------------|--------------------|
| hESC_H3K27me3_20682450 | <b>5.89784E-14</b> | <b>1.79884E-11</b> |
| mESC_H3K27me3_17603471 | <b>1.78285E-13</b> | <b>2.71885E-11</b> |
| mESC_H3K9me3_19884255  | <b>1.91796E-09</b> | <b>1.94993E-07</b> |
| CHiP_SUZ12-18974828    | <b>3.79545E-08</b> | <b>2.89403E-06</b> |
| mMEF_K27me3_17603471   | <b>1.44703E-07</b> | <b>8.82688E-06</b> |
| CHiP_MTF2-20144788     | <b>8.63335E-07</b> | <b>4.38862E-05</b> |
| CHiP_SUZ12-18692474    | <b>1.42594E-06</b> | <b>6.21303E-05</b> |
| CHiP_EZH2-18974828     | <b>1.21833E-05</b> | <b>0.000464488</b> |
| mNPC_K27me3_17603471   | <b>5.49037E-05</b> | <b>0.001674563</b> |
| CHiP_SUZ12-18555785    | <b>5.27687E-05</b> | <b>0.001674563</b> |

## ESCAPE 7979 genes

P-value Adjusted p-value

|                        |                    |                    |
|------------------------|--------------------|--------------------|
| mESC_H3K27me3_17603471 | <b>4.44942E-51</b> | <b>1.37932E-48</b> |
| CHiP_SUZ12-18974828    | <b>2.39781E-38</b> | <b>3.71661E-36</b> |
| hESC_H3K27me3_20682450 | <b>2.69286E-37</b> | <b>2.78263E-35</b> |
| CHiP_SUZ12-18692474    | <b>3.02417E-32</b> | <b>2.34373E-30</b> |
| CHiP_MTF2-20144788     | <b>5.57499E-32</b> | <b>3.4565E-30</b>  |
| CHiP_EZH2-18974828     | <b>1.0298E-31</b>  | <b>5.32065E-30</b> |
| mESC_H3K9me3_19884255  | <b>4.45745E-27</b> | <b>1.97402E-25</b> |
| CHiP_JARID2-20064375   | <b>4.72639E-26</b> | <b>1.83148E-24</b> |
| CHiP_RNF2-22325148     | <b>4.92907E-25</b> | <b>1.69779E-23</b> |
| CHiP_RNF2-18974828     | <b>3.7711E-24</b>  | <b>1.16904E-22</b> |

## GTEx Tissue Sample Gene Expression Profiles up 5986 genes

P-value Adjusted p-value

|                                                         |                    |                    |
|---------------------------------------------------------|--------------------|--------------------|
| GTEx-T2IS-0011-R5A-SM-32QP4_brain_female_20-29_years    | <b>7.39447E-21</b> | <b>2.15771E-17</b> |
| GTEx-QDT8-0011-R10A-SM-32PKG_brain_female_30-39_years   | <b>5.34561E-20</b> | <b>7.79924E-17</b> |
| GTEx-OIZI-0008-SM-2XCFCF_skin_male_40-49_years          | <b>6.25612E-19</b> | <b>6.08512E-16</b> |
| GTEx-SNMC-1526-SM-2XCFCN_blood vessel_male_20-29_years  | <b>1.49898E-16</b> | <b>1.0935E-13</b>  |
| GTEx-QDT8-0011-R2A-SM-32PKQ_brain_female_30-39_years    | <b>6.57826E-16</b> | <b>3.83907E-13</b> |
| GTEx-OIZI-0526-SM-2XCEG_blood vessel_male_40-49_years   | <b>1.52296E-15</b> | <b>7.40664E-13</b> |
| GTEx-QMR6-0011-R8A-SM-32PKJ_brain_male_50-59_years      | <b>2.96092E-15</b> | <b>1.23428E-12</b> |
| GTEx-NPJ8-0011-R8a-SM-2HMLG_brain_male_40-49_years      | <b>4.29977E-15</b> | <b>1.56834E-12</b> |
| GTEx-SN8G-0526-SM-32PLE_blood vessel_female_50-59_years | <b>5.27021E-14</b> | <b>1.70872E-11</b> |
| GTEx-PVOW-0011-R5A-SM-32PL7_brain_male_40-49_years      | <b>7.63633E-14</b> | <b>2.22828E-11</b> |

## GTEx Tissue Sample Gene Expression Profiles up 7979 genes

P-value Adjusted p-value

|                                                         |                    |                    |
|---------------------------------------------------------|--------------------|--------------------|
| GTEx-SNMC-1526-SM-2XCFCN_blood vessel_male_20-29_years  | <b>1.00794E-41</b> | <b>2.94116E-38</b> |
| GTEx-T2IS-0011-R5A-SM-32QP4_brain_female_20-29_years    | <b>1.1941E-40</b>  | <b>1.74219E-37</b> |
| GTEx-QDT8-0011-R10A-SM-32PKG_brain_female_30-39_years   | <b>1.21874E-39</b> | <b>1.18543E-36</b> |
| GTEx-OIZI-0008-SM-2XCFCF_skin_male_40-49_years          | <b>3.80382E-34</b> | <b>2.77489E-31</b> |
| GTEx-PVOW-0011-R5A-SM-32PL7_brain_male_40-49_years      | <b>7.93741E-31</b> | <b>4.63227E-28</b> |
| GTEx-PVOW-0011-R3A-SM-32PKX_brain_male_40-49_years      | <b>6.28057E-30</b> | <b>3.05445E-27</b> |
| GTEx-OIZI-0526-SM-2XCEG_blood vessel_male_40-49_years   | <b>8.54238E-30</b> | <b>3.56095E-27</b> |
| GTEx-QDT8-0011-R2A-SM-32PKQ_brain_female_30-39_years    | <b>9.93569E-29</b> | <b>3.62404E-26</b> |
| GTEx-TMMY-0626-SM-33HBD_blood vessel_female_40-49_years | <b>1.71193E-28</b> | <b>5.55046E-26</b> |
| GTEx-NPJ8-0011-R8a-SM-2HMLG_brain_male_40-49_years      | <b>1.91286E-28</b> | <b>5.58173E-26</b> |



# 11,878 fixed human-specific insertions

## GTEX Tissue Sample Gene Expression Profiles down 7979 genes

|                                                  | P-value            | Adjusted p-value   |
|--------------------------------------------------|--------------------|--------------------|
| GTEX-X638-0005-SM-47JX6_blood_female_70-79_years | <b>1.04434E-63</b> | <b>3.04737E-60</b> |
| GTEX-XQ3S-0006-SM-4BOQ4_blood_male_20-29_years   | <b>3.90159E-53</b> | <b>5.69242E-50</b> |
| GTEX-XMK1-0005-SM-4B665_blood_male_40-49_years   | <b>1.28663E-47</b> | <b>1.25146E-44</b> |
| GTEX-XMD3-0006-SM-4AT5X_blood_female_50-59_years | <b>3.40004E-45</b> | <b>2.48033E-42</b> |
| GTEX-NPJ7-0006-SM-3GACR_blood_female_60-69_years | <b>3.02613E-42</b> | <b>1.76605E-39</b> |
| GTEX-XLM4-0005-SM-4AT4P_blood_male_60-69_years   | <b>1.75487E-38</b> | <b>8.53453E-36</b> |
| GTEX-WCDI-0005-SM-3NB2M_blood_male_50-59_years   | <b>7.88578E-38</b> | <b>3.28725E-35</b> |
| GTEX-XGQ4-0004-SM-4AT5S_blood_male_50-59_years   | <b>5.61964E-37</b> | <b>2.04977E-34</b> |
| GTEX-X15G-0005-SM-3NMDA_blood_female_50-59_years | <b>5.55996E-36</b> | <b>1.80266E-33</b> |
| GTEX-XUYS-0002-SM-47JXL_blood_male_50-59_years   | <b>9.02958E-35</b> | <b>2.3953E-32</b>  |

## GTEX Tissue Sample Gene Expression Profiles down 5986 genes

|                                                  | P-value            | Adjusted p-value   |
|--------------------------------------------------|--------------------|--------------------|
| GTEX-XQ3S-0006-SM-4BOQ4_blood_male_20-29_years   | <b>4.60421E-31</b> | <b>1.34351E-27</b> |
| GTEX-X638-0005-SM-47JX6_blood_female_70-79_years | <b>2.69265E-30</b> | <b>3.92858E-27</b> |
| GTEX-XMK1-0005-SM-4B665_blood_male_40-49_years   | <b>1.1337E-25</b>  | <b>1.10271E-22</b> |
| GTEX-XMD3-0006-SM-4AT5X_blood_female_50-59_years | <b>5.63683E-22</b> | <b>4.11207E-19</b> |
| GTEX-NPJ7-0006-SM-3GACR_blood_female_60-69_years | <b>7.72356E-21</b> | <b>4.50747E-18</b> |
| GTEX-VJYA-0005-SM-3P5ZD_blood_male_60-69_years   | <b>5.96893E-19</b> | <b>2.90289E-16</b> |
| GTEX-X4XX-0005-SM-3NMCS_blood_male_60-69_years   | <b>8.15686E-19</b> | <b>3.40024E-16</b> |
| GTEX-XOT4-0005-SM-4B64S_blood_female_60-69_years | <b>4.54574E-18</b> | <b>1.65806E-15</b> |
| GTEX-WCDI-0005-SM-3NB2M_blood_male_50-59_years   | <b>1.97267E-17</b> | <b>6.39584E-15</b> |
| GTEX-X88G-0006-SM-47JX5_blood_male_30-39_years   | <b>4.52769E-17</b> | <b>1.32118E-14</b> |

**4,637 human-specific TE-encoded loci  
expressed in human DLPFC**

# 4,637 human-specific TE-encoded loci expressed in human DLPFC

## ARCHS4 Tissues 2323 genes

|                      | P-value           | Adjusted p-value |
|----------------------|-------------------|------------------|
| PREFRONTAL CORTEX    | <b>9.8570E-06</b> | <b>0.00107</b>   |
| CINGULATE GYRUS      | <b>0.000652</b>   | <b>0.0295</b>    |
| NEURONAL EPITHELIUM  | <b>0.000820</b>   | <b>0.0295</b>    |
| FETAL BRAIN CORTEX   | <b>0.004439</b>   | <b>0.1199</b>    |
| CEREBELLUM           |                   |                  |
| BRAIN (BULK)         |                   |                  |
| PANCREATIC ISLET     |                   |                  |
| CEREBRAL CORTEX      |                   |                  |
| DENTATE GRANULE CELL |                   |                  |
| DORSAL STRIATUM      |                   |                  |

## ARCHS4 Tissues 4051 genes

|                     | P-value            | Adjusted p-value   |
|---------------------|--------------------|--------------------|
| PREFRONTAL CORTEX   | <b>7.00452E-50</b> | <b>7.56488E-48</b> |
| CINGULATE GYRUS     | <b>6.71991E-34</b> | <b>3.62875E-32</b> |
| NEURONAL EPITHELIUM | <b>8.68697E-32</b> | <b>3.12731E-30</b> |
| CEREBELLUM          | <b>9.55784E-29</b> | <b>2.58062E-27</b> |
| CEREBRAL CORTEX     | <b>3.61112E-21</b> | <b>7.80002E-20</b> |
| SPINAL CORD         | <b>2.49377E-20</b> | <b>3.84754E-19</b> |
| SPINAL CORD (BULK)  | <b>2.49377E-20</b> | <b>3.84754E-19</b> |
| DORSAL STRIATUM     | <b>1.66653E-18</b> | <b>2.24982E-17</b> |
| MOTOR NEURON        | <b>6.09151E-15</b> | <b>7.30981E-14</b> |
| FETAL BRAIN CORTEX  | <b>9.14708E-15</b> | <b>9.87885E-14</b> |

## Jensen TISSUES 2323 genes

|                 | P-value            | Adjusted p-value   |
|-----------------|--------------------|--------------------|
| Hypothalamus    | <b>6.32274E-21</b> | <b>8.46615E-18</b> |
| Occipital_lobe  | <b>4.24993E-14</b> | <b>2.84533E-11</b> |
| Brain           | <b>2.96068E-13</b> | <b>1.32145E-10</b> |
| Parietal_lobe   | <b>6.54347E-12</b> | <b>2.19043E-09</b> |
| Adipose_tissue  | <b>1.12994E-11</b> | <b>3.02598E-09</b> |
| Frontal_lobe    | <b>2.30117E-11</b> | <b>5.13545E-09</b> |
| Cerebral_cortex | <b>1.36673E-10</b> | <b>2.61436E-08</b> |
| Thyroid_gland   | <b>2.08353E-10</b> | <b>3.48731E-08</b> |
| Lymph_node      | <b>2.7611E-10</b>  | <b>4.1079E-08</b>  |
| Ovary           | <b>3.53351E-10</b> | <b>4.73136E-08</b> |

## Jensen TISSUES 4051 genes

|                 | P-value            | Adjusted p-value   |
|-----------------|--------------------|--------------------|
| Hypothalamus    | <b>1.42728E-50</b> | <b>2.3279E-47</b>  |
| Brain           | <b>1.03046E-34</b> | <b>8.40342E-32</b> |
| Cerebral_cortex | <b>2.82988E-25</b> | <b>1.53851E-22</b> |
| Frontal_lobe    | <b>6.36197E-23</b> | <b>2.59409E-20</b> |
| Occipital_lobe  | <b>1.39104E-20</b> | <b>4.53756E-18</b> |
| Heart           | <b>4.28896E-18</b> | <b>1.16588E-15</b> |
| Ovary           | <b>6.32042E-17</b> | <b>1.28858E-14</b> |
| Cerebellum      | <b>5.93135E-17</b> | <b>1.28858E-14</b> |
| Parietal_lobe   | <b>2.07605E-16</b> | <b>3.76226E-14</b> |
| Gall_bladder    | <b>1.09267E-15</b> | <b>1.78215E-13</b> |

## 4,637 human-specific TE-encoded loci expressed in human DLPFC

### Jensen DISEASES 2323 genes

### Jensen DISEASES 4051 genes

|                            | P-value           | Adjusted p-value |
|----------------------------|-------------------|------------------|
| Carcinoma                  | <b>1.7817E-14</b> | <b>2.295E-11</b> |
| Kidney_cancer              | <b>1.324E-05</b>  | <b>0.0085</b>    |
| Takayasu's_arteritis       | <b>0.00191</b>    | <b>0.615</b>     |
| Liver_cancer               | <b>0.00475</b>    | <b>0.615</b>     |
| Essential_hypertension     | <b>0.00481</b>    | <b>0.615</b>     |
| Major_depressive_disorder  | <b>0.00572</b>    | <b>0.615</b>     |
| Aicardi-Goutieres_syndrome | <b>0.00548</b>    | <b>0.615</b>     |
| Sclerocornea               | <b>0.00503</b>    | <b>0.615</b>     |
| Schizophrenia              | <b>0.00311</b>    | <b>0.615</b>     |
| Melanoma                   | <b>0.00360</b>    | <b>0.615</b>     |

|                                          | P-value            | Adjusted p-value   |
|------------------------------------------|--------------------|--------------------|
| Carcinoma                                | <b>1.28507E-65</b> | <b>2.0317E-62</b>  |
| Kidney_cancer                            | <b>9.99971E-54</b> | <b>7.90477E-51</b> |
| Liver_cancer                             | <b>7.45524E-35</b> | <b>3.92891E-32</b> |
| Melanoma                                 | <b>1.10876E-26</b> | <b>4.38237E-24</b> |
| Skin_cancer                              | <b>2.69121E-26</b> | <b>8.50962E-24</b> |
| Breast_cancer                            | <b>8.01818E-17</b> | <b>2.11279E-14</b> |
| Acquired_metabolic_disease               | <b>1.65991E-14</b> | <b>3.74902E-12</b> |
| Lung_cancer                              | <b>2.30061E-14</b> | <b>4.54659E-12</b> |
| Endometrial_cancer                       | <b>9.04405E-12</b> | <b>1.58874E-09</b> |
| Attention_deficit_hyperactivity_disorder | <b>4.39818E-11</b> | <b>6.95353E-09</b> |

### Disease Perturbations from GEO down 2323 genes

### Disease Perturbations from GEO down 4051 genes

|                                                                      | P-value        |
|----------------------------------------------------------------------|----------------|
| dilated cardiomyopathy DOID-12930 human GSE42955 sample 678          | <b>0.00151</b> |
| idiopathic pulmonary fibrosis DOID-0050156 human GSE24206 sample 869 | <b>0.00452</b> |
| Bipolar Disorder C0005586 human GSE5389 sample 302                   | <b>0.00559</b> |
| autism spectrum disorder DOID-0060041 human GSE62632 sample 1037     | <b>0.00941</b> |
| peripartum cardiomyopathy DOID-9997 human GSE42955 sample 817        | <b>0.01179</b> |
| Acne C0702166 human GSE10432 sample 297                              | <b>0.01285</b> |
| cardiomyopathy DOID-0050700 human GSE9128 sample 781                 | <b>0.01552</b> |
| idiopathic pulmonary fibrosis DOID-0050156 human GSE24206 sample 872 | <b>0.01657</b> |
| Down Syndrome C0013080 human GSE5390 sample 277                      | <b>0.01875</b> |
| Down syndrome DOID-14250 human GSE16677 sample 1064                  | <b>0.01994</b> |

|                                                                      | P-value            | Adjusted p-value   |
|----------------------------------------------------------------------|--------------------|--------------------|
| Bipolar Disorder C0005586 human GSE5389 sample 302                   | <b>2.14561E-10</b> | <b>1.80017E-07</b> |
| autism spectrum disorder DOID-0060041 human GSE62632 sample 1037     | <b>8.52294E-10</b> | <b>3.57537E-07</b> |
| schizophrenia DOID-5419 human GSE25673 sample 892                    | <b>3.04969E-09</b> | <b>8.52897E-07</b> |
| idiopathic pulmonary fibrosis DOID-0050156 human GSE44723 sample 850 | <b>3.50643E-08</b> | <b>6.19354E-06</b> |
| Crohn's disease DOID-8778 human GSE6731 sample 757                   | <b>3.69102E-08</b> | <b>6.19354E-06</b> |
| schizophrenia DOID-5419 human GSE25673 sample 891                    | <b>1.45048E-07</b> | <b>2.02826E-05</b> |
| ulcerative colitis DOID-8577 human GSE6731 sample 759                | <b>3.44284E-07</b> | <b>4.12649E-05</b> |
| Crohn's disease DOID-8778 human GSE6731 sample 758                   | <b>2.50335E-06</b> | <b>0.000262539</b> |
| Alzheimer's disease DOID-10652 human GSE36980 sample 520             | <b>7.29851E-06</b> | <b>0.000663404</b> |
| Nephroblastoma C0027708 human GSE2712 sample 418                     | <b>8.00156E-06</b> | <b>0.000663404</b> |

## 4,637 human-specific TE-encoded loci expressed in human DLPFC

### Disease Perturbations from GEO up 2323 genes

|                                                                       | P-value        |
|-----------------------------------------------------------------------|----------------|
| Spinal Muscular Atrophy C0026847 mouse GSE10599 sample 235            | <b>0.00102</b> |
| oligodendroglioma DOID-3181 human GSE15824 sample 858                 | <b>0.00129</b> |
| Hypoxia C0242184 human GSE4483 sample 440                             | <b>0.00265</b> |
| familial combined hyperlipidemia DOID-13809 human GSE11393 sample 773 | <b>0.00343</b> |
| Familial combined hyperlipidaemia C0020474 human GSE11393 sample 267  | <b>0.00477</b> |
| Acute Lung Injury C0242488 human GSE10474 sample 168                  | <b>0.00495</b> |
| astrocytoma DOID-3069 human GSE15824 sample 861                       | <b>0.00581</b> |
| oligodendroglioma DOID-3181 human GSE15824 sample 859                 | <b>0.00725</b> |
| fragile X syndrome DOID-14261 human GSE7329 sample 809                | <b>0.00738</b> |
| Huntington's disease DOID-12858 human GSE1751 sample 795              | <b>0.00813</b> |

### ENCODE and ChEA Consensus TFs from CHIP-X 2323 genes

|                | P-value            | Adjusted p-value |
|----------------|--------------------|------------------|
| AR_CHEA        | <b>2.35459E-06</b> | <b>0.000245</b>  |
| UBTF_ENCODE    | <b>8.26486E-05</b> | <b>0.004298</b>  |
| NFE2L2_CHEA    | <b>0.00051872</b>  | <b>0.017982</b>  |
| CREB1_CHEA     | <b>0.000838763</b> | <b>0.021808</b>  |
| SMAD4_CHEA     | <b>0.00141901</b>  | <b>0.029515</b>  |
| REST_CHEA      | <b>0.001930935</b> | <b>0.033470</b>  |
| PPARD_CHEA     | <b>0.005210793</b> | <b>0.077417</b>  |
| E2F1_CHEA      | <b>0.007865845</b> | <b>0.102256</b>  |
| TCF3_ENCODE    | <b>0.00921029</b>  | <b>0.106430</b>  |
| BHLHE40_ENCODE | <b>0.016264119</b> | <b>0.154696</b>  |

### Disease Perturbations from GEO up 4051 genes

|                                                                      | P-value            | Adjusted p-value   |
|----------------------------------------------------------------------|--------------------|--------------------|
| Spinal Muscular Atrophy C0026847 mouse GSE10599 sample 235           | <b>1.30588E-20</b> | <b>1.09564E-17</b> |
| adrenoleukodystrophy DOID-10588 human GSE34309 sample 864            | <b>1.45115E-11</b> | <b>6.08757E-09</b> |
| morbid obesity DOID-11981 human GSE48964 sample 583                  | <b>4.21321E-08</b> | <b>1.17829E-05</b> |
| schizophrenia DOID-5419 human GSE25673 sample 892                    | <b>7.40939E-08</b> | <b>1.55412E-05</b> |
| schizophrenia DOID-5419 human GSE25673 sample 891                    | <b>1.09191E-07</b> | <b>1.83222E-05</b> |
| idiopathic pulmonary fibrosis DOID-0050156 human GSE44723 sample 851 | <b>2.54256E-07</b> | <b>3.55534E-05</b> |
| idiopathic pulmonary fibrosis DOID-0050156 human GSE44723 sample 850 | <b>4.62071E-07</b> | <b>5.53825E-05</b> |
| adrenoleukodystrophy DOID-10588 human GSE34308 sample 709            | <b>7.11277E-07</b> | <b>7.45952E-05</b> |
| smoldering myeloma DOID-9551 human GSE47552 sample 562               | <b>8.43186E-06</b> | <b>0.000786037</b> |
| melanoma DOID-1909 human GSE6887 sample 948                          | <b>1.68944E-05</b> | <b>0.001417438</b> |

### ENCODE and ChEA Consensus TFs from CHIP-X 4051 genes

|             | P-value            | Adjusted p-value   |
|-------------|--------------------|--------------------|
| AR_CHEA     | <b>1.64997E-45</b> | <b>1.71596E-43</b> |
| SMAD4_CHEA  | <b>8.28178E-35</b> | <b>4.30653E-33</b> |
| NFE2L2_CHEA | <b>1.04996E-28</b> | <b>3.63986E-27</b> |
| SUZ12_CHEA  | <b>1.75619E-28</b> | <b>4.56609E-27</b> |
| REST_CHEA   | <b>7.0257E-19</b>  | <b>1.46134E-17</b> |
| TRIM28_CHEA | <b>1.70459E-09</b> | <b>2.95463E-08</b> |
| STAT3_CHEA  | <b>1.13034E-07</b> | <b>1.47386E-06</b> |
| GATA1_CHEA  | <b>1.13374E-07</b> | <b>1.47386E-06</b> |
| TCF3_CHEA   | <b>3.29897E-07</b> | <b>3.81215E-06</b> |
| UBTF_ENCODE | <b>8.55045E-07</b> | <b>8.89247E-06</b> |

## 4,637 human-specific TE-encoded loci expressed in human DLPFC

### GTEx Tissue Sample Gene Expression Profiles up 2323 genes

P-value Adjusted p-value

|                                                       |                    |                    |
|-------------------------------------------------------|--------------------|--------------------|
| GTEx-QDT8-0011-R10A-SM-32PKG_brain_female_30-39_years | <b>7.1111E-12</b>  | <b>2.07502E-08</b> |
| GTEx-PVOW-0011-R3A-SM-32PKX_brain_male_40-49_years    | <b>9.49921E-10</b> | <b>9.23956E-07</b> |
| GTEx-QVJO-0011-R10A-SM-2S1QJ_brain_female_60-69_years | <b>7.11092E-10</b> | <b>9.23956E-07</b> |
| GTEx-WVLH-0011-R10A-SM-3MJFM_brain_male_50-59_years   | <b>2.68224E-09</b> | <b>1.79484E-06</b> |
| GTEx-T2IS-0011-R5A-SM-32QP4_brain_female_20-29_years  | <b>3.69056E-09</b> | <b>1.79484E-06</b> |
| GTEx-QMR6-0011-R10A-SM-32PKO_brain_male_50-59_years   | <b>3.36753E-09</b> | <b>1.79484E-06</b> |
| GTEx-QMR6-0011-R8A-SM-32PKJ_brain_male_50-59_years    | <b>2.36488E-08</b> | <b>9.85818E-06</b> |
| GTEx-WL46-0011-R10A-SM-3MJFQ_brain_male_50-59_years   | <b>8.65217E-08</b> | <b>3.15588E-05</b> |
| GTEx-N7MS-0011-R3a-SM-33HC6_brain_male_60-69_years    | <b>1.69843E-07</b> | <b>5.50669E-05</b> |
| GTEx-NL3H-0011-R3a-SM-2I3GL_brain_male_60-69_years    | <b>2.34416E-07</b> | <b>6.84027E-05</b> |

### GTEx Tissue Sample Gene Expression Profiles up 4051 genes

P-value Adjusted p-value

|                                                       |                    |                    |
|-------------------------------------------------------|--------------------|--------------------|
| GTEx-QDT8-0011-R10A-SM-32PKG_brain_female_30-39_years | <b>4.63841E-42</b> | <b>1.35349E-38</b> |
| GTEx-PVOW-0011-R3A-SM-32PKX_brain_male_40-49_years    | <b>4.30355E-36</b> | <b>6.27888E-33</b> |
| GTEx-T2IS-0011-R5A-SM-32QP4_brain_female_20-29_years  | <b>4.51564E-33</b> | <b>4.39221E-30</b> |
| GTEx-PVOW-0011-R5A-SM-32PL7_brain_male_40-49_years    | <b>2.56809E-31</b> | <b>1.87342E-28</b> |
| GTEx-QMR6-0011-R10A-SM-32PKO_brain_male_50-59_years   | <b>1.2302E-30</b>  | <b>7.17944E-28</b> |
| GTEx-QMR6-0011-R8A-SM-32PKJ_brain_male_50-59_years    | <b>2.1578E-28</b>  | <b>1.04941E-25</b> |
| GTEx-N7MS-0011-R3a-SM-33HC6_brain_male_60-69_years    | <b>1.01871E-26</b> | <b>4.24658E-24</b> |
| GTEx-WVLH-0011-R10A-SM-3MJFM_brain_male_50-59_years   | <b>1.71691E-26</b> | <b>6.26244E-24</b> |
| GTEx-QVJO-0011-R10A-SM-2S1QJ_brain_female_60-69_years | <b>4.26311E-26</b> | <b>1.3822E-23</b>  |
| GTEx-PVOW-2526-SM-2XCF7_brain_male_40-49_years        | <b>5.24644E-26</b> | <b>1.53091E-23</b> |

### GTEx Tissue Sample Gene Expression Profiles down 2323 genes

P-value Adjusted p-value

|                                                  |                    |                    |
|--------------------------------------------------|--------------------|--------------------|
| GTEx-XQ3S-0006-SM-4BOQ4_blood_male_20-29_years   | <b>1.57265E-10</b> | <b>4.58427E-07</b> |
| GTEx-XOT4-0005-SM-4B64S_blood_female_60-69_years | <b>7.49373E-09</b> | <b>1.09221E-05</b> |
| GTEx-WHSE-0006-SM-3NMBW_blood_male_20-29_years   | <b>1.18638E-08</b> | <b>1.15277E-05</b> |
| GTEx-WZTO-0006-SM-3NM9T_blood_male_40-49_years   | <b>2.0799E-07</b>  | <b>0.000152</b>    |
| GTEx-U3ZG-0326-SM-47JXN_muscle_male_50-59_years  | <b>5.52956E-07</b> | <b>0.000288</b>    |
| GTEx-SJXC-0005-SM-2XCE7_blood_male_60-69_years   | <b>5.91986E-07</b> | <b>0.000288</b>    |
| GTEx-X638-0005-SM-47JX6_blood_female_70-79_years | <b>1.2182E-06</b>  | <b>0.000503</b>    |
| GTEx-PVOW-0006-SM-3NMB8_blood_male_40-49_years   | <b>1.37946E-06</b> | <b>0.000503</b>    |
| GTEx-NPJ7-0006-SM-3GACR_blood_female_60-69_years | <b>1.6573E-06</b>  | <b>0.000537</b>    |
| GTEx-T6MN-0005-SM-32PLJ_blood_male_50-59_years   | <b>2.45953E-06</b> | <b>0.000717</b>    |

### GTEx Tissue Sample Gene Expression Profiles down 4051 genes

P-value Adjusted p-value

|                                                  |                    |                    |
|--------------------------------------------------|--------------------|--------------------|
| GTEx-X638-0005-SM-47JX6_blood_female_70-79_years | <b>4.65379E-32</b> | <b>1.35798E-28</b> |
| GTEx-XQ3S-0006-SM-4BOQ4_blood_male_20-29_years   | <b>8.89061E-30</b> | <b>1.29714E-26</b> |
| GTEx-XMK1-0005-SM-4B665_blood_male_40-49_years   | <b>9.61904E-26</b> | <b>9.35612E-23</b> |
| GTEx-NPJ7-0006-SM-3GACR_blood_female_60-69_years | <b>4.2827E-24</b>  | <b>3.12423E-21</b> |
| GTEx-X88G-0006-SM-47JX5_blood_male_30-39_years   | <b>1.85727E-22</b> | <b>1.0839E-19</b>  |
| GTEx-UJHI-0006-SM-3DB8H_blood_female_50-59_years | <b>1.04583E-21</b> | <b>5.08622E-19</b> |
| GTEx-XLM4-0005-SM-4AT4P_blood_male_60-69_years   | <b>1.99878E-21</b> | <b>8.33207E-19</b> |
| GTEx-XMD3-0006-SM-4AT5X_blood_female_50-59_years | <b>1.7854E-20</b>  | <b>6.51223E-18</b> |
| GTEx-WCDI-0005-SM-3NB2M_blood_male_50-59_years   | <b>3.80474E-20</b> | <b>1.23358E-17</b> |
| GTEx-OIZF-0006-SM-2I5GQ_blood_male_60-69_years   | <b>4.35816E-20</b> | <b>1.27171E-17</b> |



# 4,637 human-specific TE-encoded loci expressed in human DLPFC

Tissue Protein Expression from Human Proteome Map 4051 genes

adult frontal cortex

p-value: 0.00006954

Adjusted p-value: 0.002086

fetal brain

p-value: 0.001310;

Adjusted p-value: 0.01966

adult retina

b cells

adult pancreas

placenta

adult kidney

adult esophagus

adult gallbladder

adult ovary

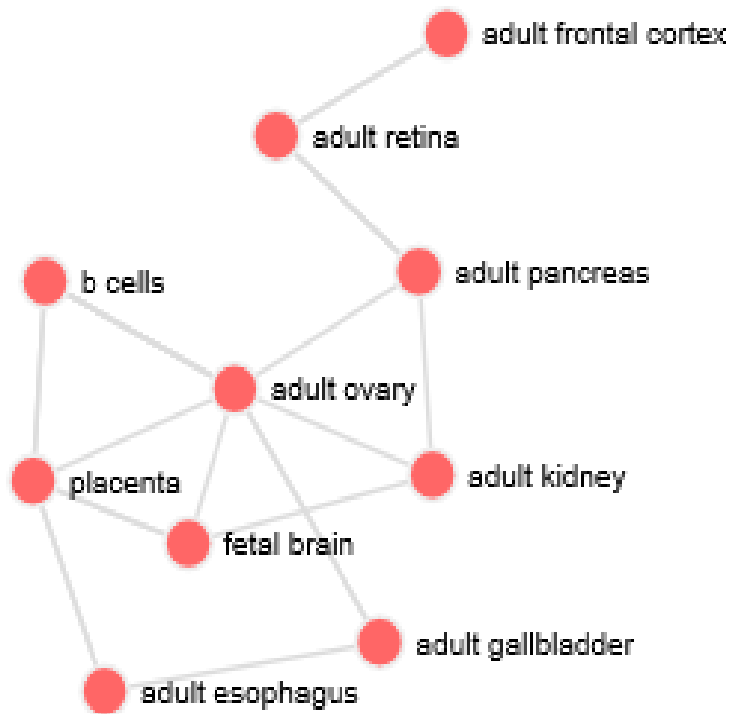

# 4,637 human-specific TE-encoded loci expressed in human DLPFC

Allen Brain Atlas up 4051 genes

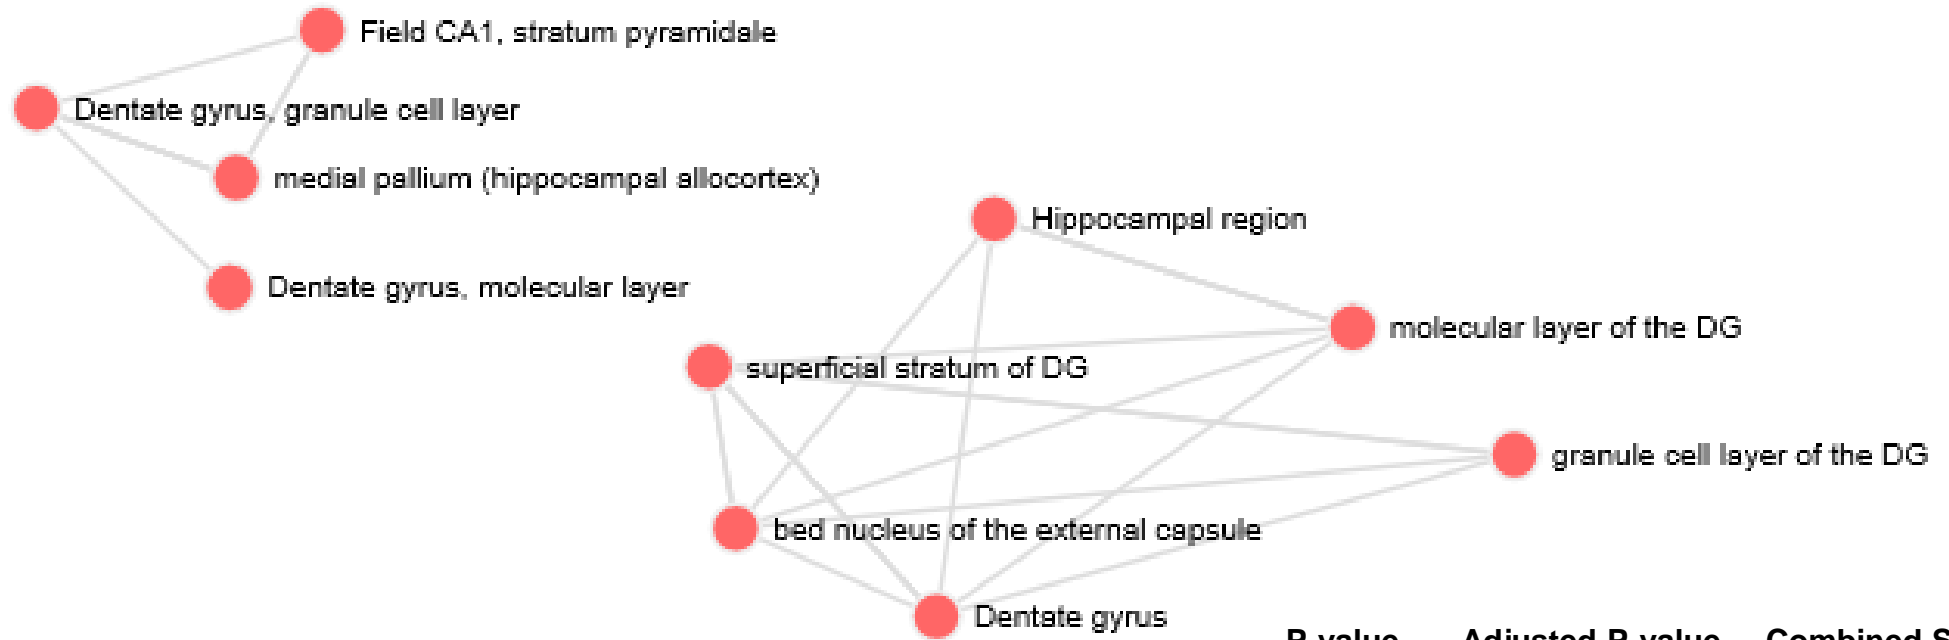

|                                         | P-value     | Adjusted P-value | Combined Score |
|-----------------------------------------|-------------|------------------|----------------|
| Dentate gyrus                           | 2.06994E-09 | 1.5124E-06       | 36.78          |
| Dentate gyrus, molecular layer          | 1.91586E-09 | 1.5124E-06       | 35.25          |
| granule cell layer of the DG            | 1.83231E-08 | 8.0328E-06       | 33.31          |
| molecular layer of the DG               | 1.91586E-09 | 1.5124E-06       | 32.40          |
| Hippocampal region                      | 3.77717E-08 | 1.1828E-05       | 31.40          |
| Dentate gyrus, granule cell layer       | 3.77717E-08 | 1.1828E-05       | 31.15          |
| bed nucleus of the external capsule     | 7.67266E-08 | 1.6818E-05       | 31.02          |
| Field CA1, stratum pyramidale           | 7.67266E-08 | 1.6818E-05       | 30.60          |
| medial pallium (hippocampal allocortex) | 7.67266E-08 | 1.6818E-05       | 29.96          |
| superficial stratum of DG               | 1.13777E-08 | 6.235E-06        | 29.70          |

sorted by combined score ranking



# 4,637 human-specific TE-encoded loci expressed in human DLPFC

Allen Brain Atlas up 4051 genes

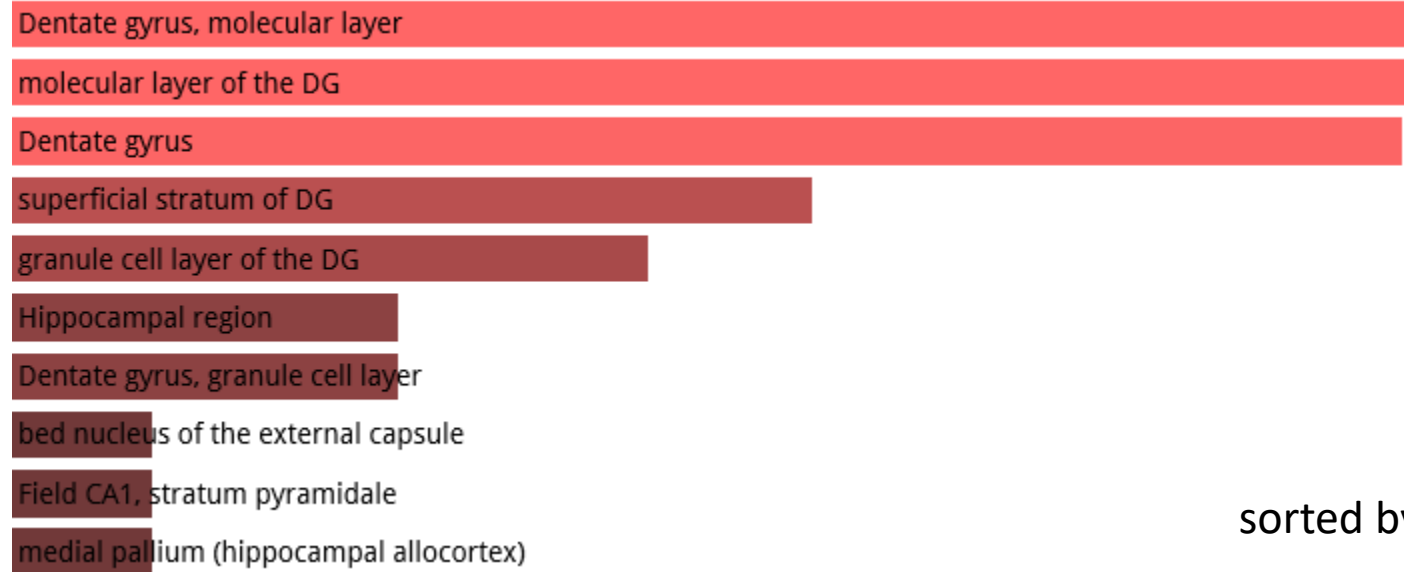

sorted by p-value ranking

## TOP 15 CATEGORIES

| Term                                    | Overlap | P-value  | Adjusted P-value |
|-----------------------------------------|---------|----------|------------------|
| Dentate gyrus                           | 110/320 | 2.07E-09 | 1.51E-06         |
| Dentate gyrus, molecular layer          | 105/301 | 1.92E-09 | 1.51E-06         |
| molecular layer of the DG               | 105/301 | 1.92E-09 | 1.51E-06         |
| superficial stratum of DG               | 179/601 | 1.14E-08 | 6.24E-06         |
| granule cell layer of the DG            | 102/301 | 1.83E-08 | 8.03E-06         |
| Hippocampal region                      | 101/301 | 3.78E-08 | 1.18E-05         |
| Dentate gyrus, granule cell layer       | 101/301 | 3.78E-08 | 1.18E-05         |
| bed nucleus of the external capsule     | 100/301 | 7.67E-08 | 1.68E-05         |
| Field CA1, stratum pyramidale           | 100/301 | 7.67E-08 | 1.68E-05         |
| medial pallium (hippocampal allocortex) | 100/301 | 7.67E-08 | 1.68E-05         |
| mantle zone of DG                       | 174/599 | 1.22E-07 | 2.4E-05          |
| Subiculum, dorsal part, molecular layer | 99/301  | 1.54E-07 | 2.4E-05          |
| hilus of the DG                         | 99/301  | 1.54E-07 | 2.4E-05          |
| Dentate gyrus, polymorph layer          | 99/301  | 1.54E-07 | 2.4E-05          |
| hippocampus (cortex Ammonis)            | 98/301  | 3.03E-07 | 2.88E-05         |

# 4,637 human-specific TE-encoded loci expressed in human DLPFC

## Allen Brain Atlas up 4051 genes

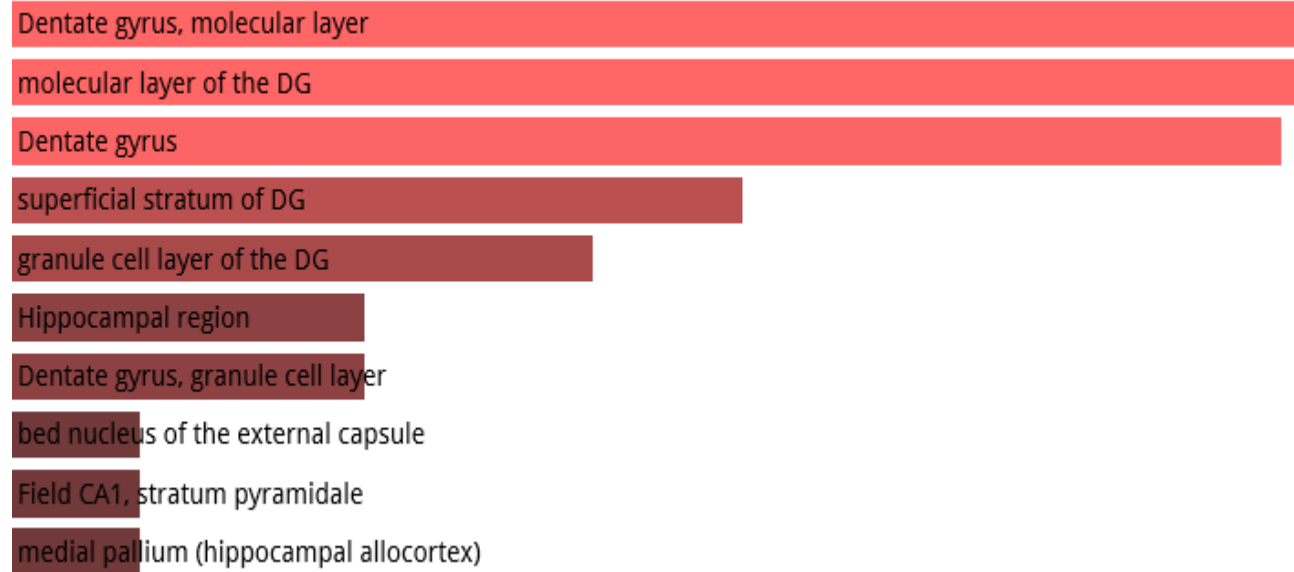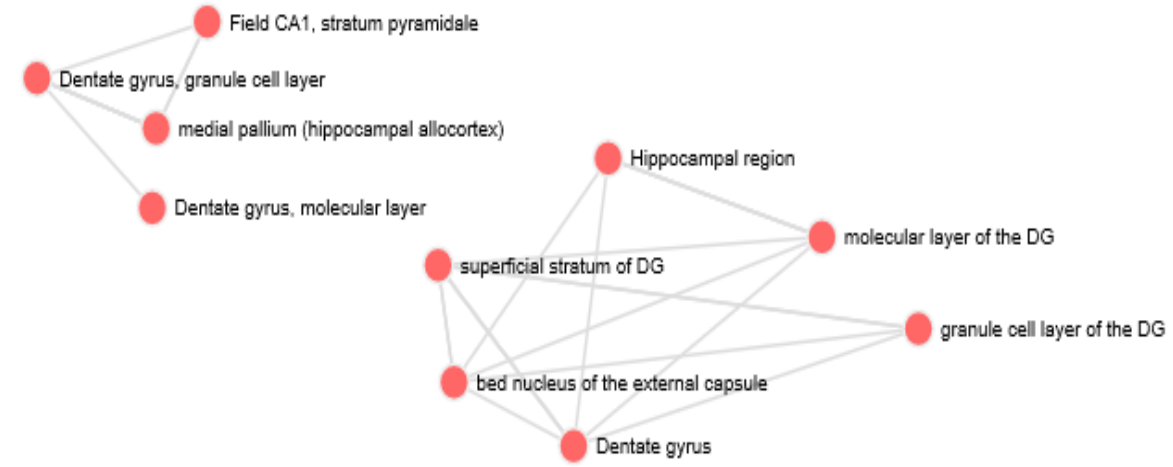

## Allen Brain Atlas up 2323 genes

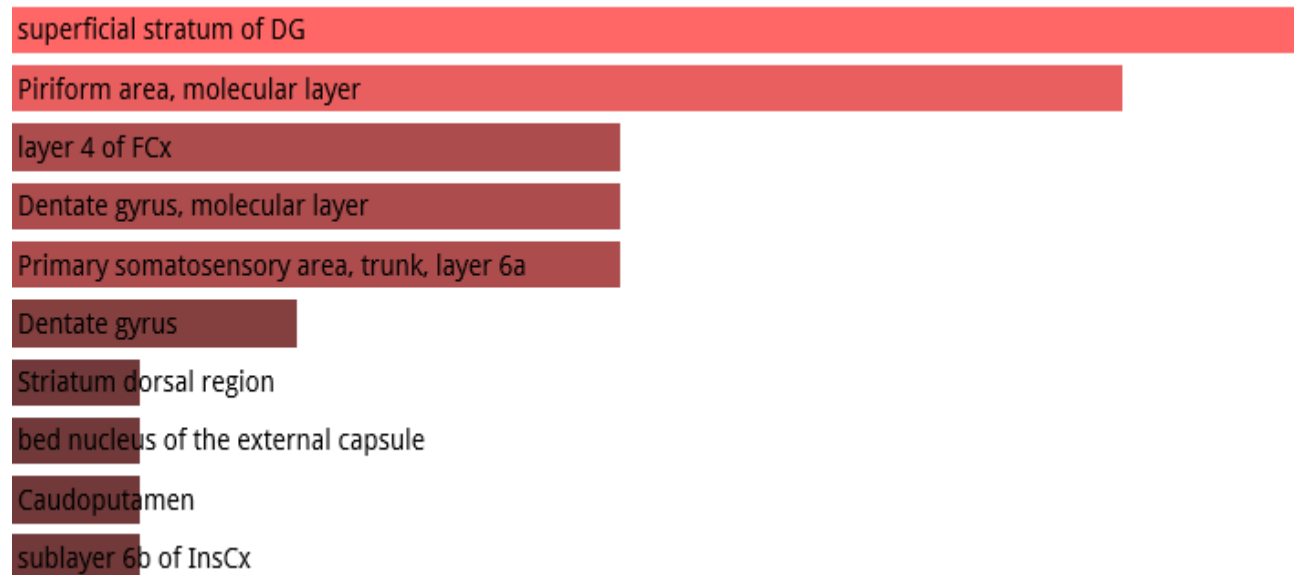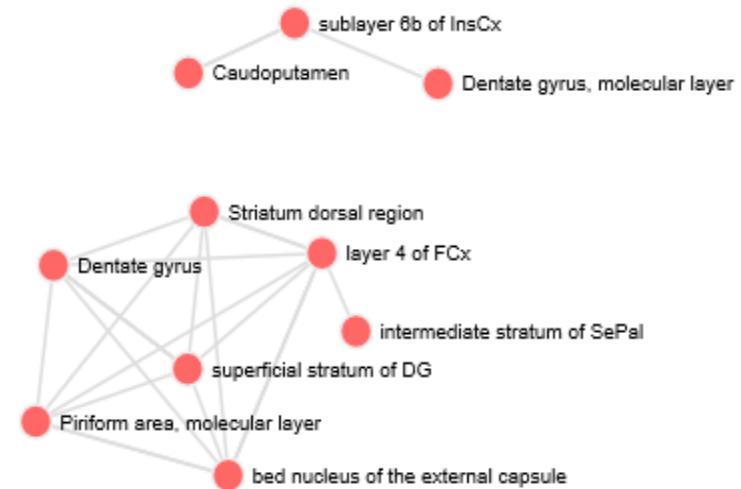

**Comparisons of putative regulatory target genes  
associated with**

**11,878 fixed human-specific insertions**

**and**

**4,637 human-specific TE - encoded loci expressed in  
human dorsolateral prefrontal cortex (DLPFC)**

**4,637 human-specific TE-encoded loci expressed in human DLPFC**  
ENCODE and ChEA Consensus TFs from ChIP-X 4051 genes

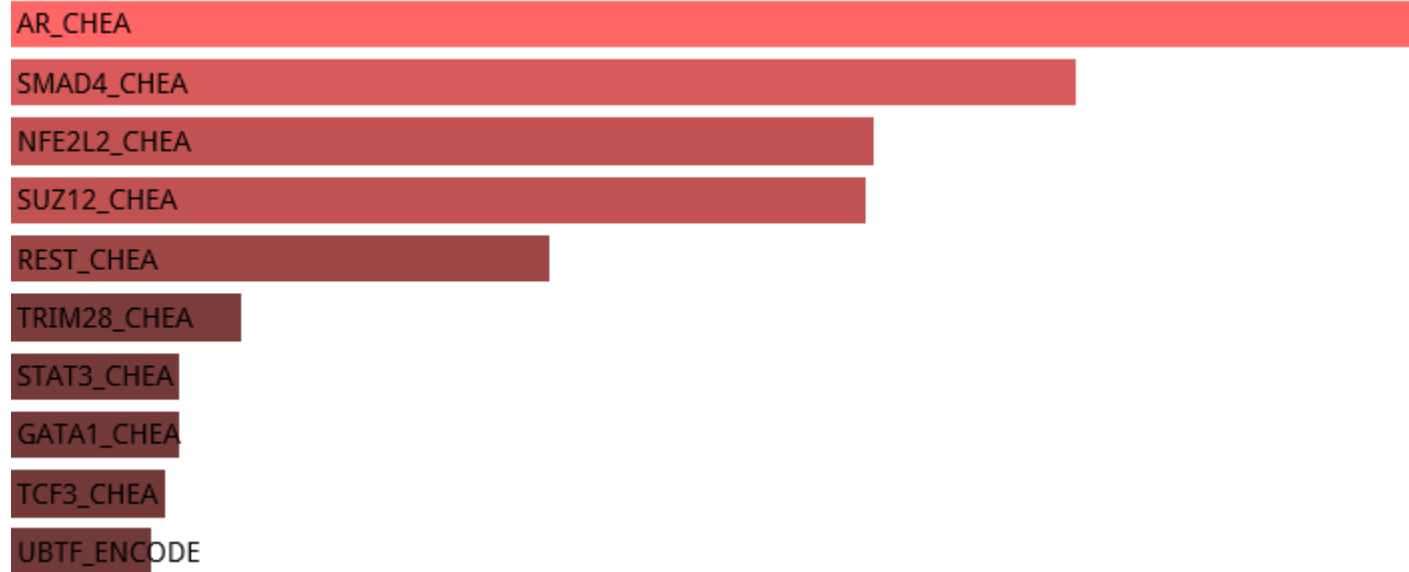

**11,878 fixed human-specific insertions**  
ENCODE and ChEA Consensus TFs from ChIP-X 7979 genes

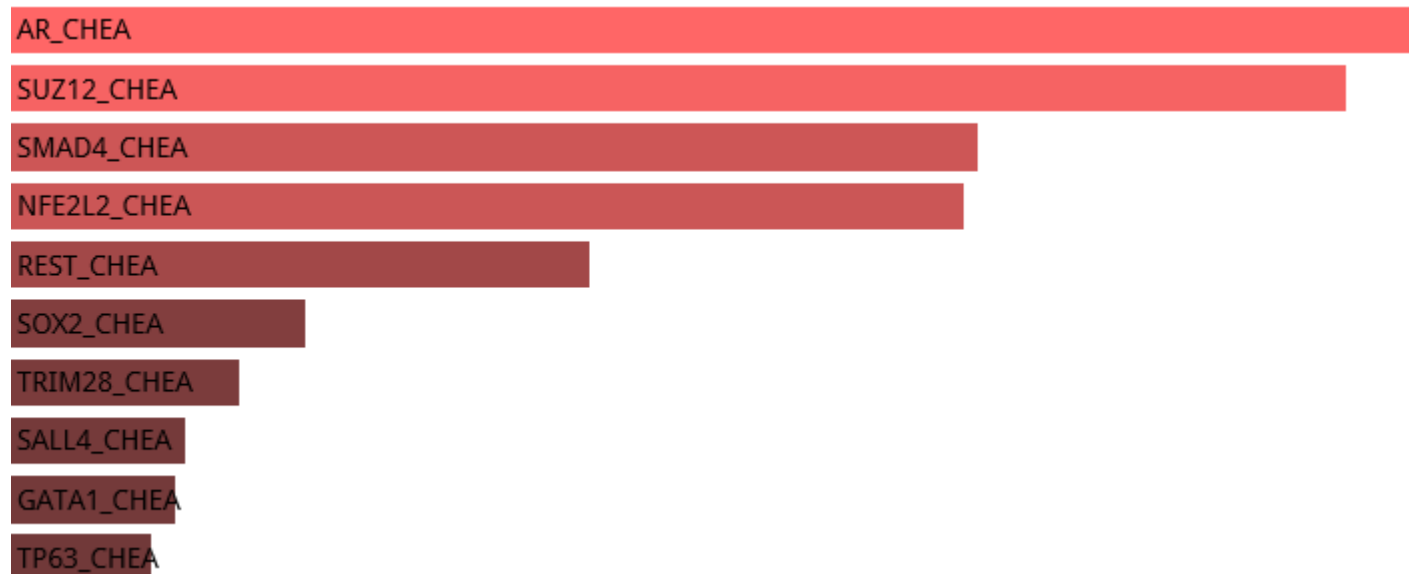

**4,637 human-specific TE-encoded loci expressed in human DLPFC**  
ChEA 2016 4051 genes

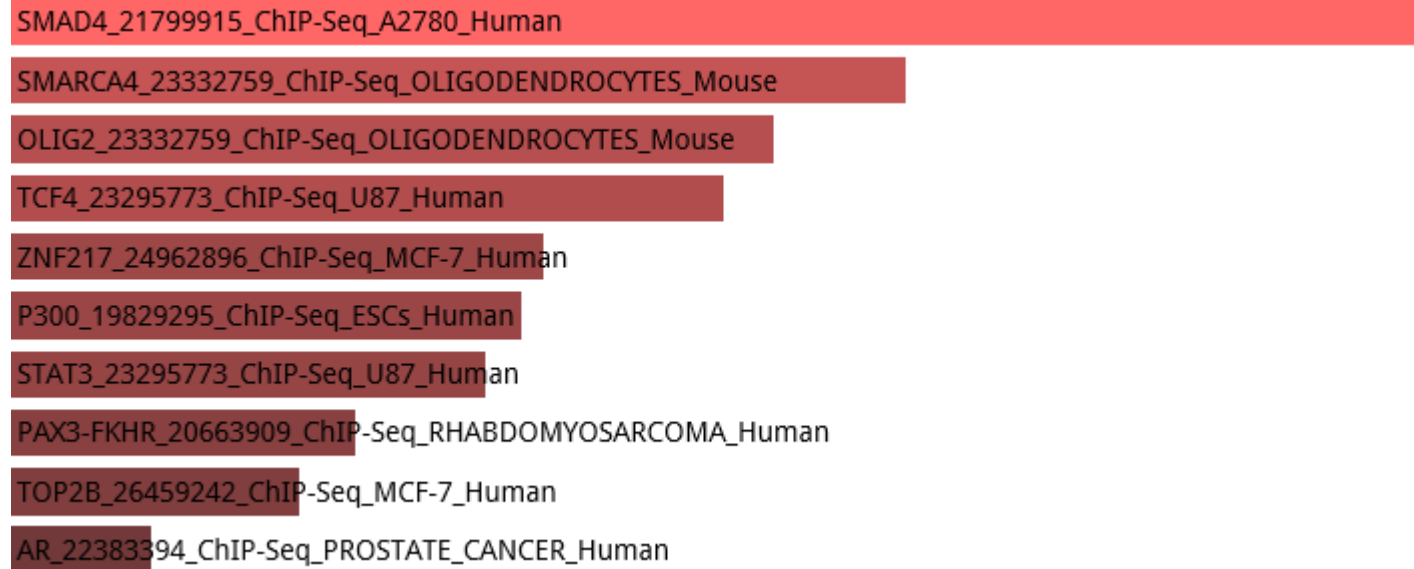

**11,878 fixed human-specific insertions**  
ChEA 2016 7979 genes

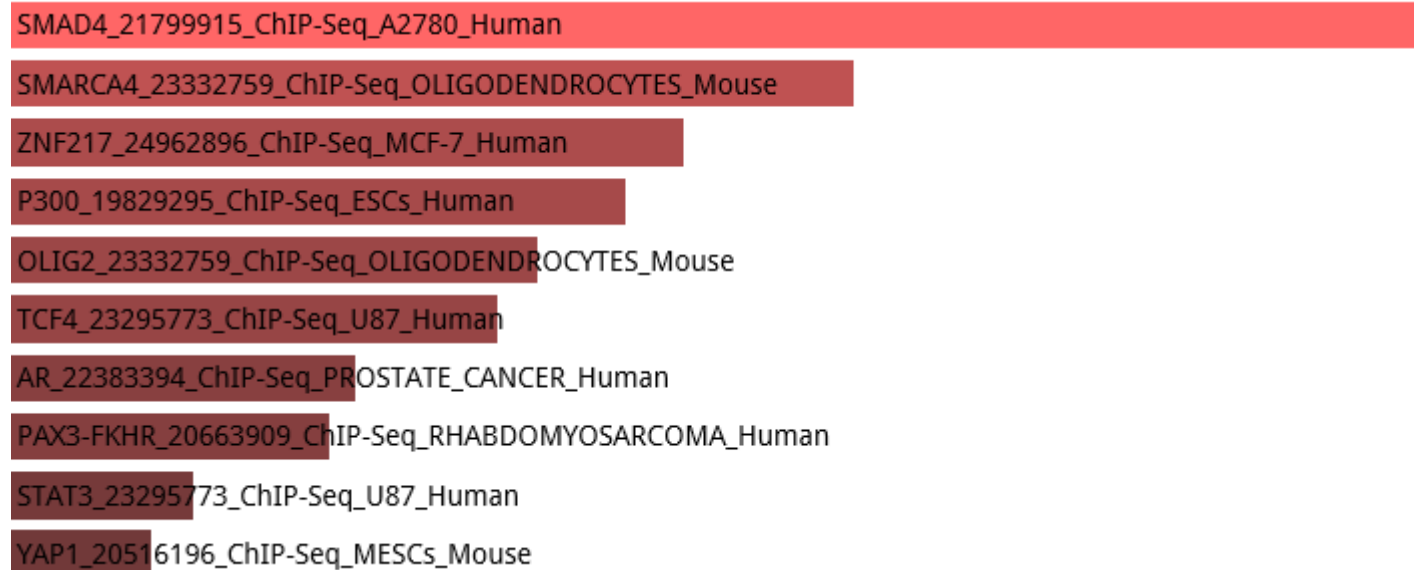

## 4,637 human-specific TE-encoded loci expressed in human DLPFC

### TF Perturbations Followed by Expression 4051 genes

BCL11B\_KO\_MOUSE\_GSE9330\_CREEDSID\_GENE\_28\_UP  
SOX5\_OE\_FETALCORTEX\_HUMAN\_GSE89057\_RNASEQ\_UP  
DMRTA2\_OE\_MOUSE\_GSE25179\_CREEDSID\_GENE\_2204\_DOWN  
REST\_INHIBITION\_HUMAN\_GSE40695\_CREEDSID\_GENE\_1710\_UP  
EOMES\_KO\_MOUSE\_GSE43387\_CREEDSID\_GENE\_2147\_DOWN  
ZEB2\_SHRNA\_H1\_HUMAN\_GSE69618\_DAY6\_RNASEQ\_DOWN  
NRL\_DEFICIENCY\_MOUSE\_GSE4051\_CREEDSID\_GENE\_263\_DOWN  
NFKB1\_ACTIVATION\_HUMAN\_GSE20736\_CREEDSID\_GENE\_2522\_DOWN  
MECP2\_KO\_MOUSE\_GSE8720\_CREEDSID\_GENE\_2418\_UP  
MYC\_KD\_HUMAN\_GSE54872\_CREEDSID\_GENE\_1307\_UP

## 11,878 fixed human-specific insertions

### TF Perturbations Followed by Expression 7979 genes

BCL11B\_KO\_MOUSE\_GSE9330\_CREEDSID\_GENE\_28\_UP  
SOX5\_OE\_FETALCORTEX\_HUMAN\_GSE89057\_RNASEQ\_UP  
POU5F1\_KD\_HUMAN\_GSE21135\_CREEDSID\_GENE\_1329\_UP  
POU4F1\_KO\_MOUSE\_GSE19997\_CREEDSID\_GENE\_2947\_UP  
GATA6\_OE\_HESC\_HUMAN\_GSE69322\_KSRMEDIA\_RNASEQ\_DOWN  
DMRTA2\_OE\_MOUSE\_GSE25179\_CREEDSID\_GENE\_2204\_DOWN  
ZEB2\_SHRNA\_H1\_HUMAN\_GSE69618\_DAY6\_RNASEQ\_DOWN  
PITX2\_KO\_786O\_HUMAN\_GSE67844\_RNASEQ\_UP  
NFKB1\_ACTIVATION\_HUMAN\_GSE20736\_CREEDSID\_GENE\_2522\_DOWN  
REST\_INHIBITION\_HUMAN\_GSE40695\_CREEDSID\_GENE\_1710\_UP

## 4,637 human-specific TE-encoded loci expressed in human DLPFC

### TRANSFAC and JASPAR PWMs 4051 genes

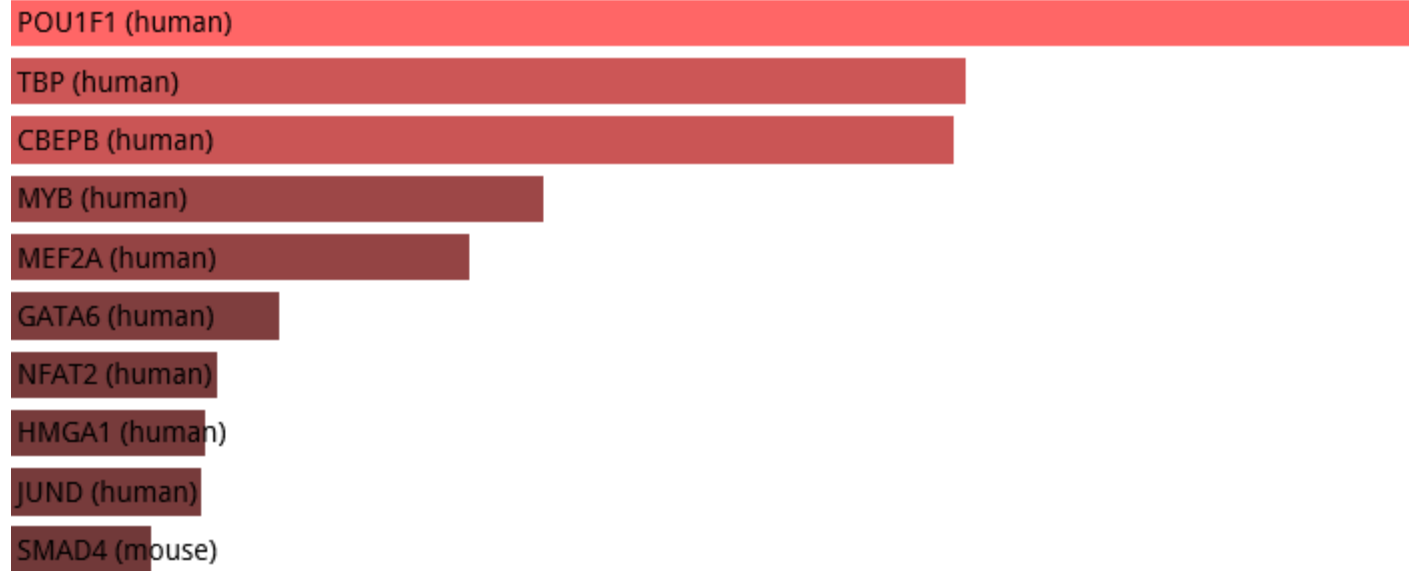

## 11,878 fixed human-specific insertions

### TRANSFAC and JASPAR PWMs 7979 genes

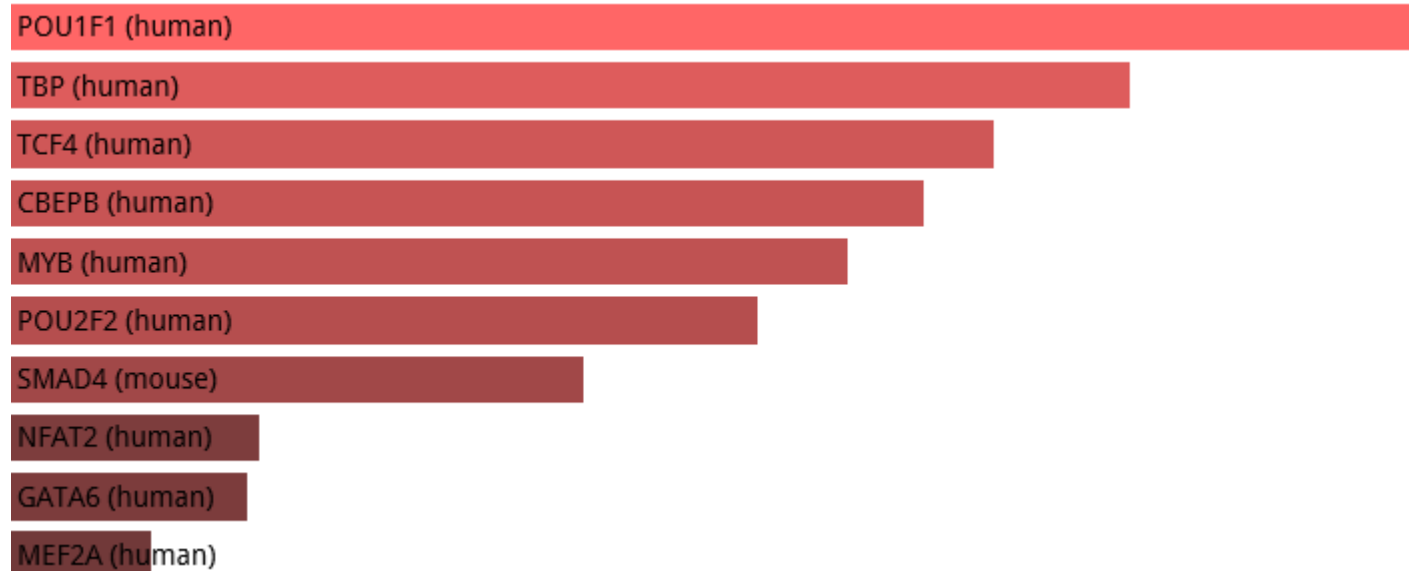

# RNA-Seq Expression Data from GTEx (53 Tissues, 570 Donors)

Gene expression for POU1F1 (ENSG00000064835.6)

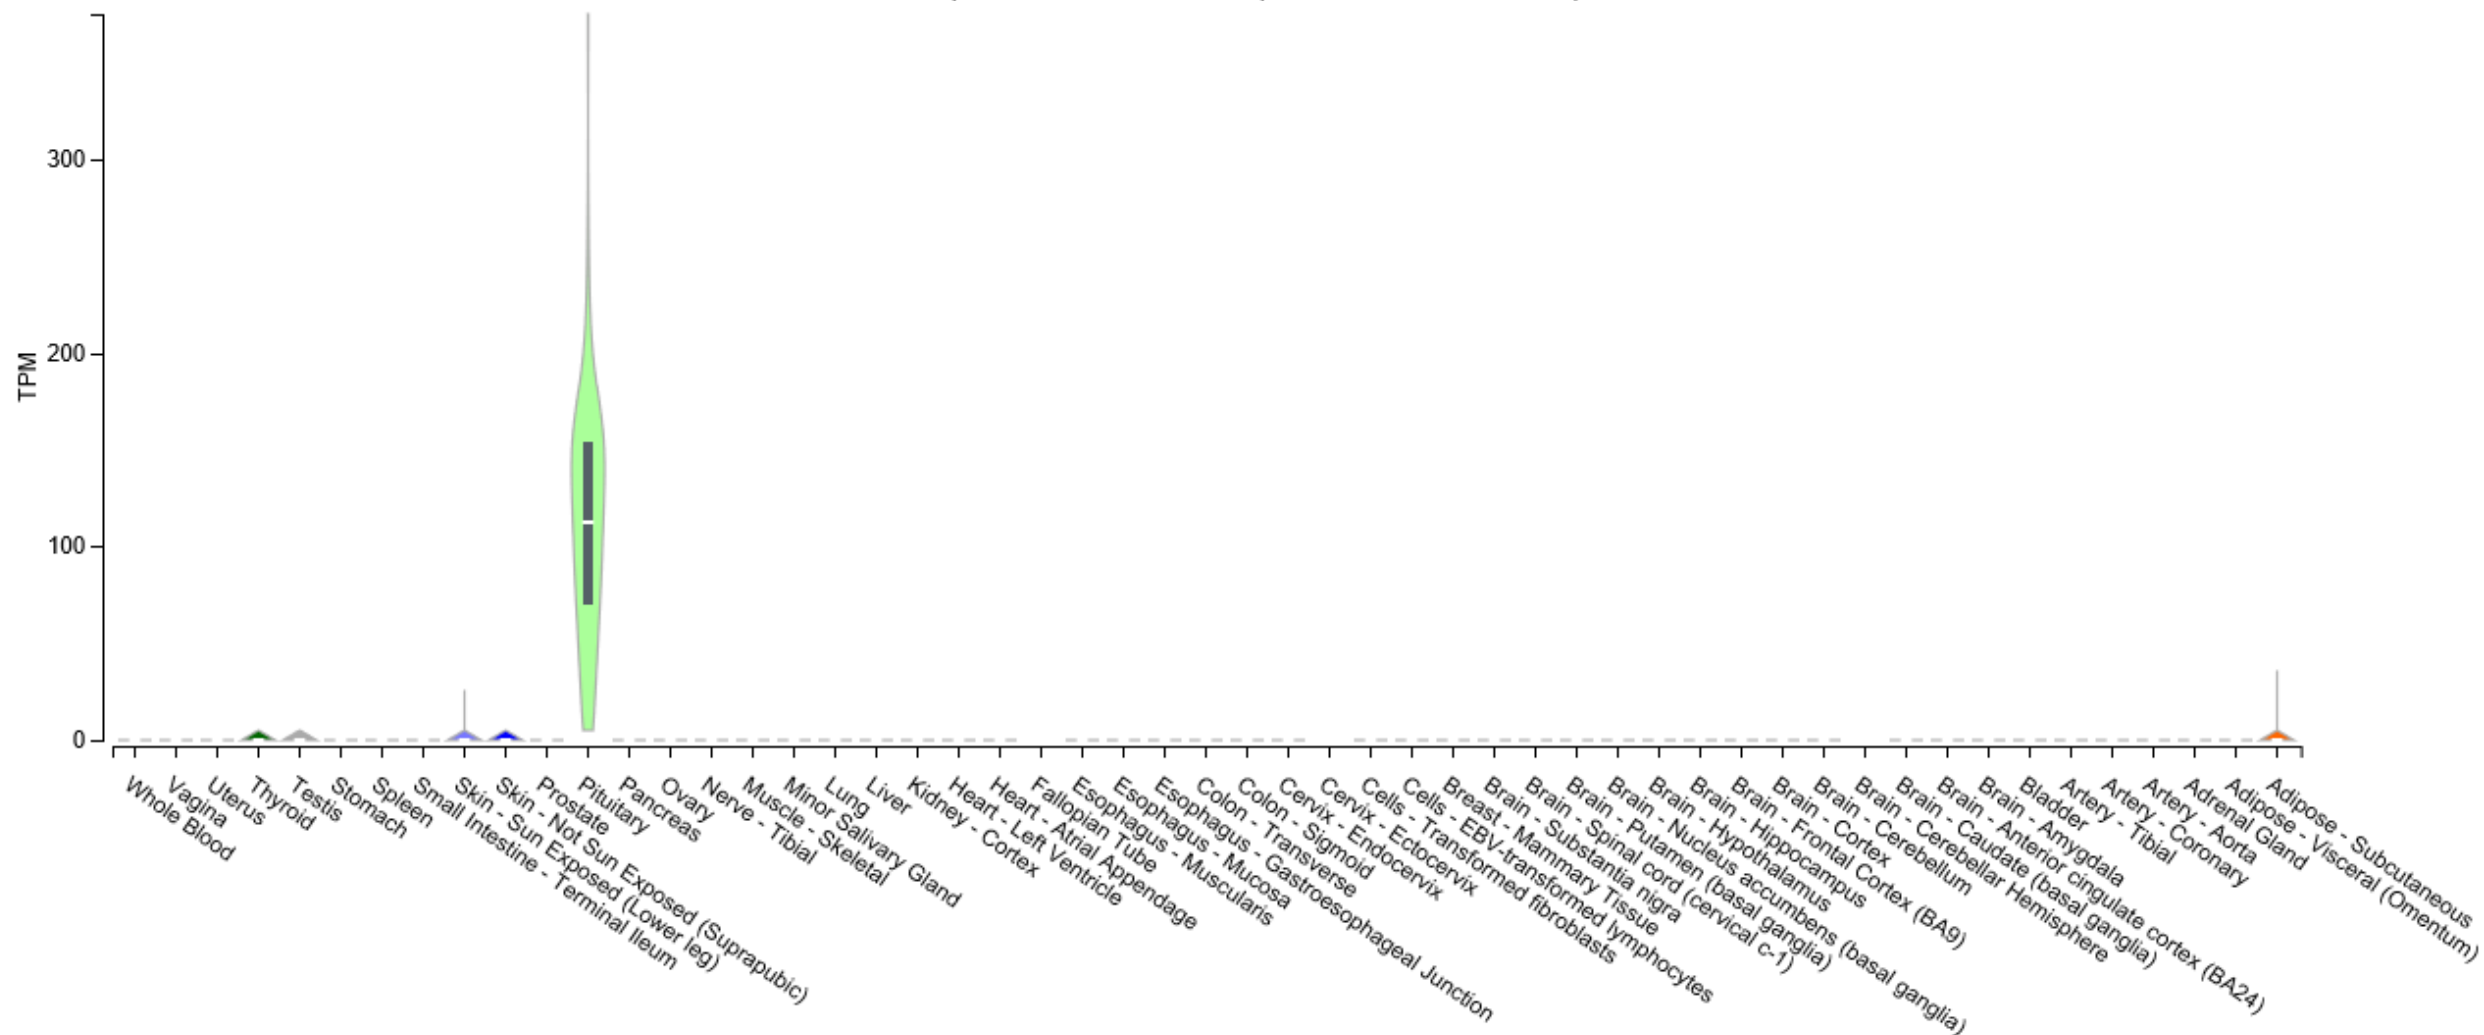



## 4,637 human-specific TE-encoded loci expressed in human DLPFC

ENCODE Histone Modifications 2015 4051 genes

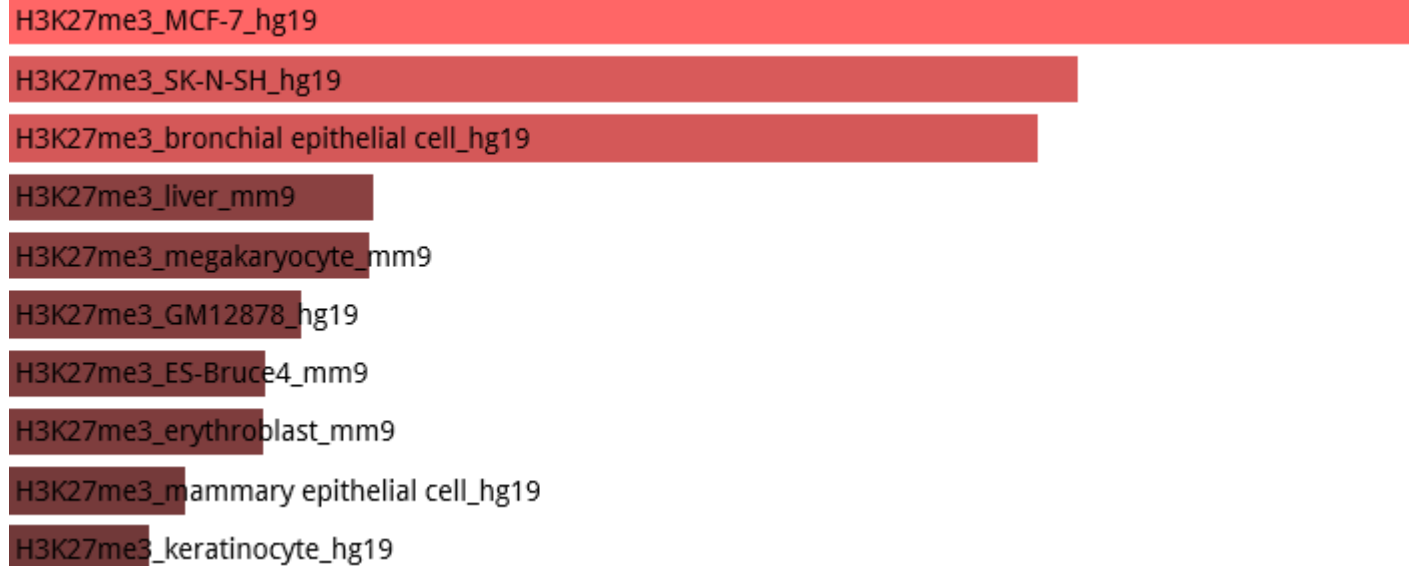

## 11,878 fixed human-specific insertions

ENCODE Histone Modifications 2015 7979 genes genes

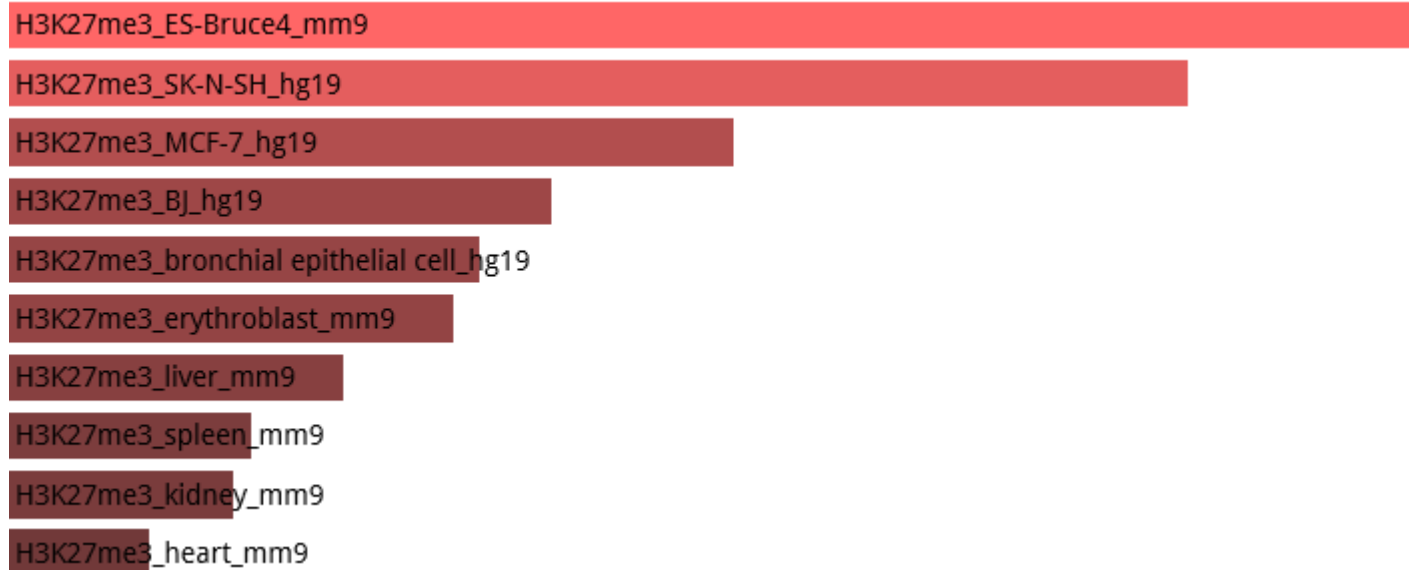

## 4,637 human-specific TE-encoded loci expressed in human DLPFC

### ARCHS4 Kinases Co-expression 4051 genes

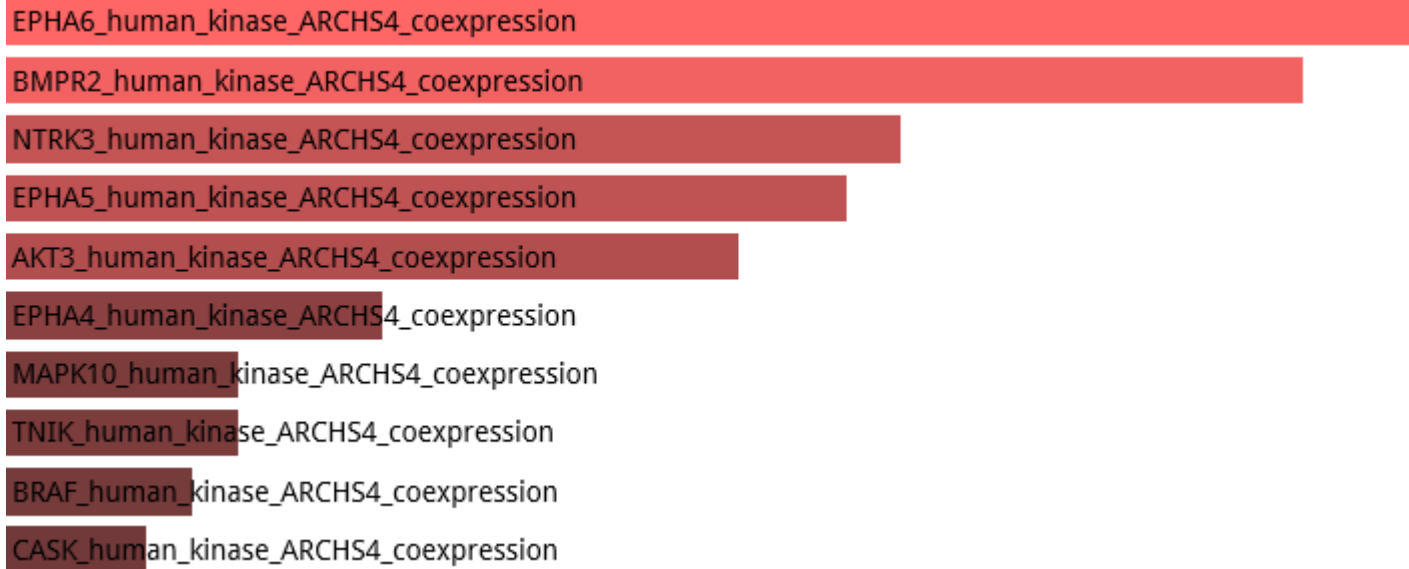

## 11,878 fixed human-specific insertions

### ARCHS4 Kinases Co-expression 7979 genes genes

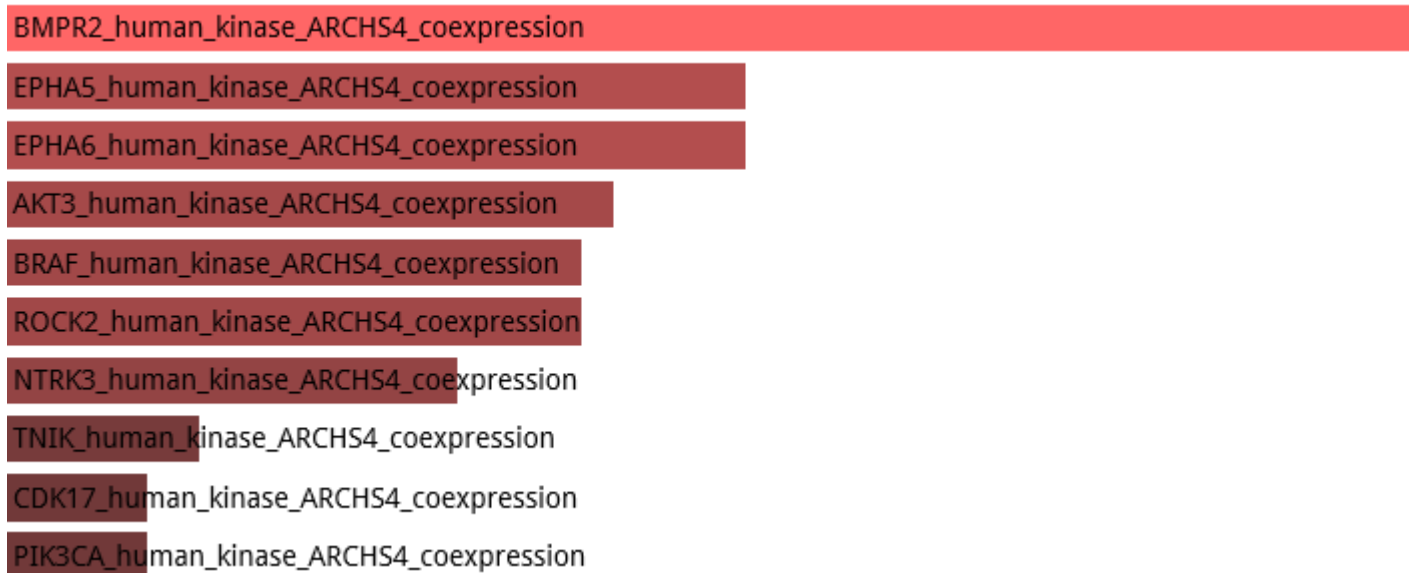

## 4,637 human-specific TE-encoded loci expressed in human DLPFC

Transcription Factor PPIs 4051 genes

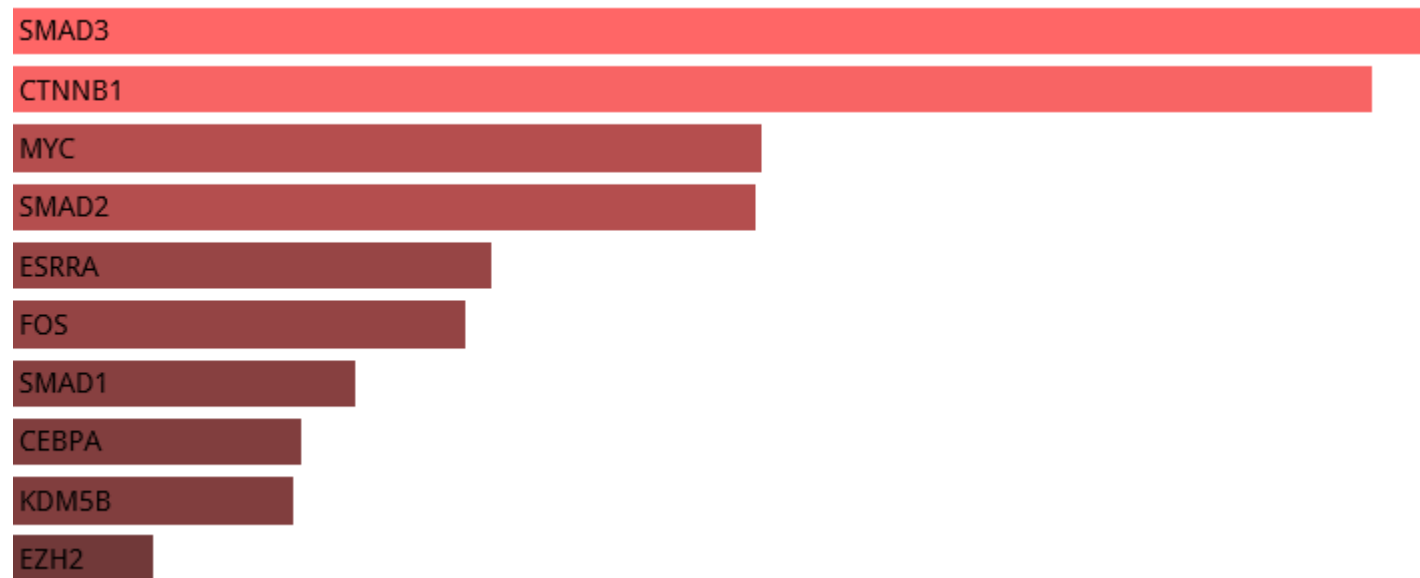

## 11,878 fixed human-specific insertions

Transcription Factor PPIs 7979 genes

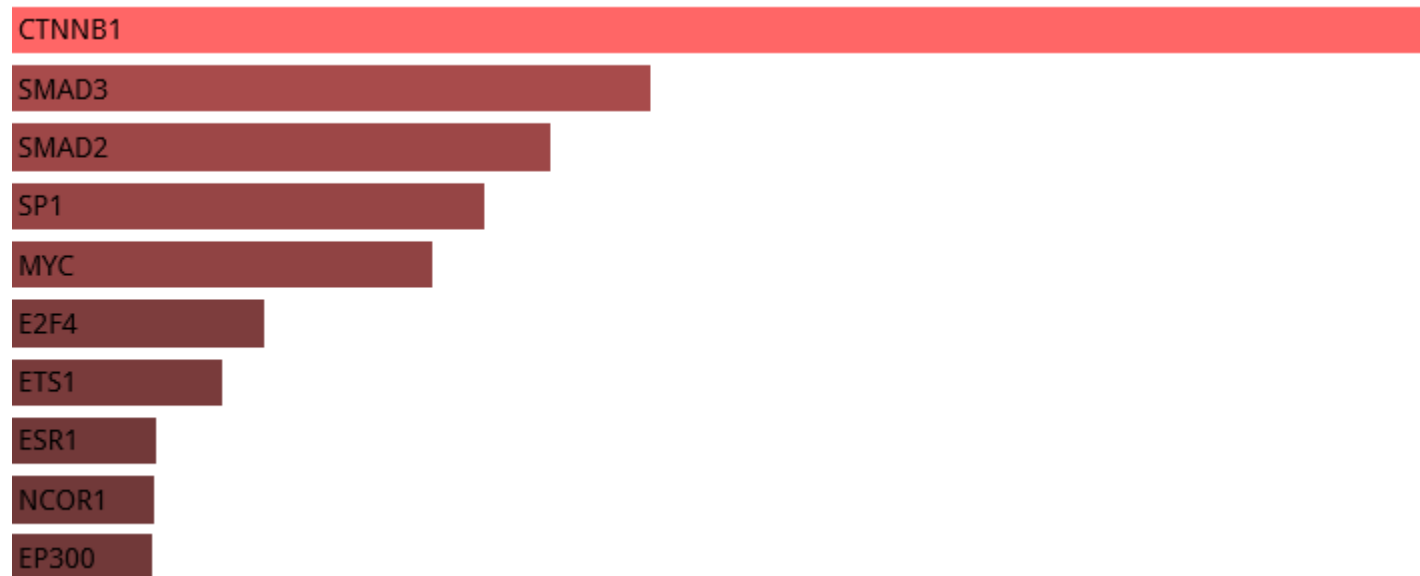

## 4,637 human-specific TE-encoded loci expressed in human DLPFC

### ARCHS4 TFs Co-expression 4051 genes

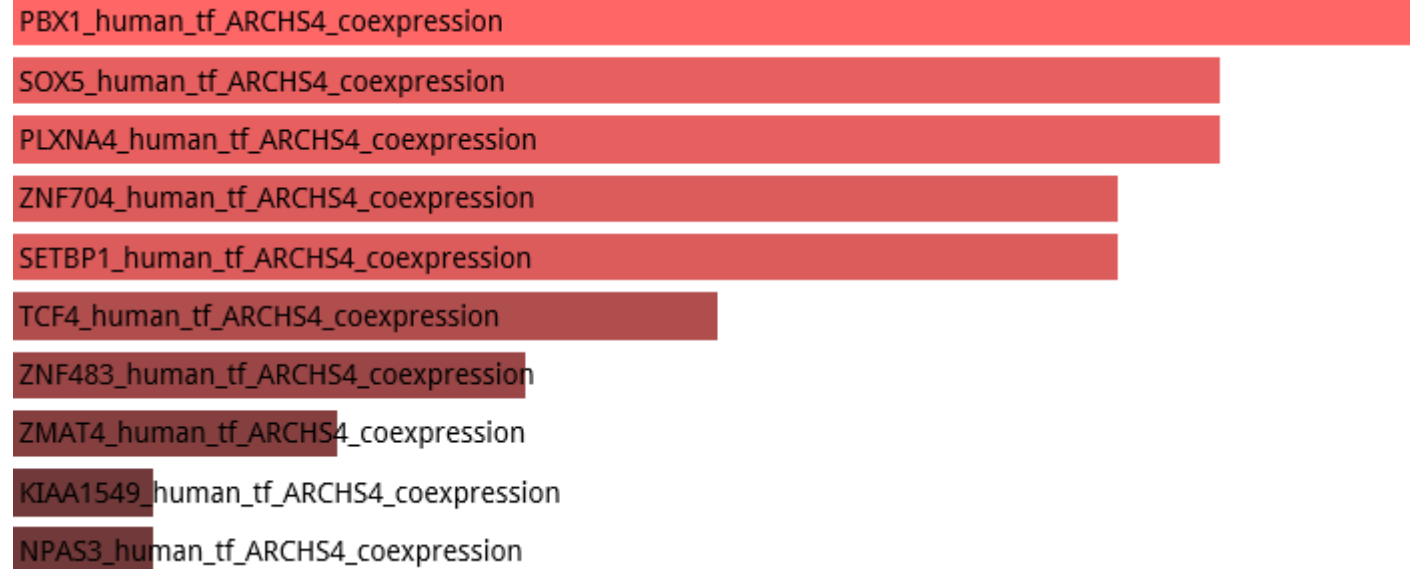

## 11,878 fixed human-specific insertions

### ARCHS4 TFs Co-expression 7979 genes

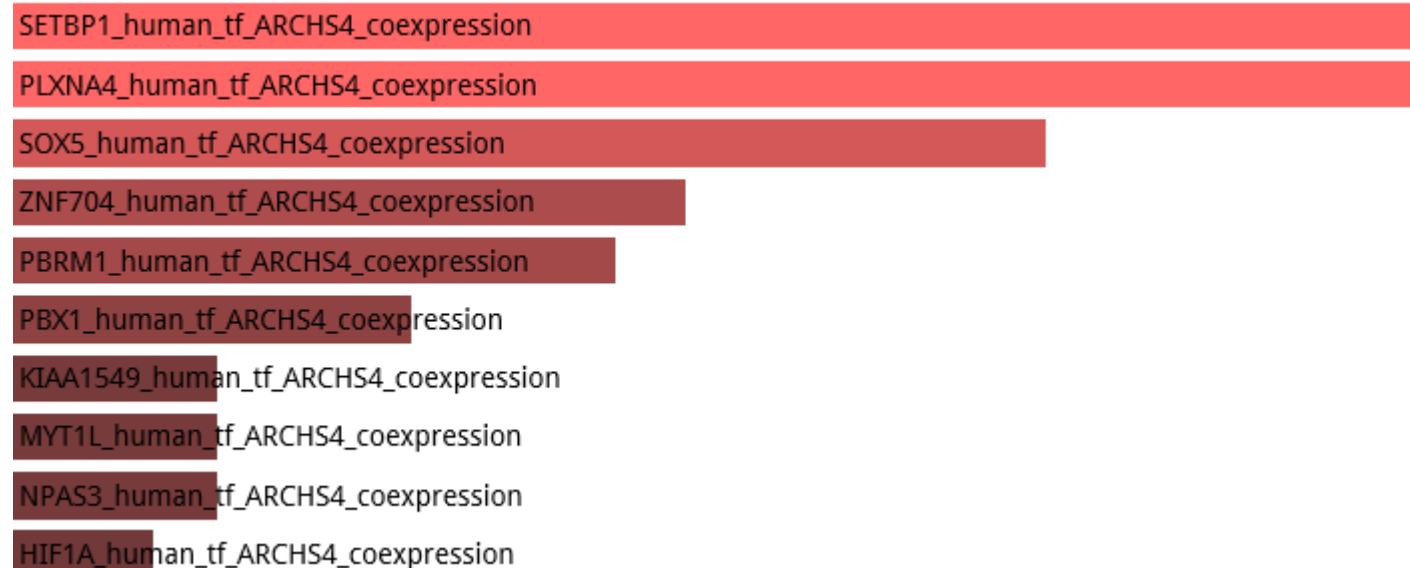

## 4,637 human-specific TE-encoded loci expressed in human DLPFC

### ESCAPE 4051 genes

|                        |             |             |
|------------------------|-------------|-------------|
| JARID2-20075857_UP     | 9.91998E-22 | 2.95615E-19 |
| CHiP_SUZ12-18974828    | 1.24005E-14 | 1.84767E-12 |
| mESC_H3K27me3_17603471 | 3.60039E-13 | 3.57639E-11 |
| CHiP_SUZ12-18692474    | 2.53887E-11 | 1.89146E-09 |
| CHiP_SUZ12-18555785    | 1.53774E-10 | 9.16493E-09 |
| CHiP_JARID2-20064375   | 2.44213E-10 | 1.21292E-08 |
| CHiP_EZH2-18974828     | 6.03372E-10 | 2.56864E-08 |
| CHiP_MTF2-20144788     | 2.38371E-09 | 8.87931E-08 |
| hESC_H3K27me3_20682450 | 2.0445E-08  | 6.76958E-07 |
| CHiP_RNF2-22325148     | 8.34666E-08 | 2.4873E-06  |

## 11,878 fixed human-specific insertions

### ESCAPE 7979 genes

|                        |             |             |
|------------------------|-------------|-------------|
| mESC_H3K27me3_17603471 | 4.44942E-51 | 1.37932E-48 |
| CHiP_SUZ12-18974828    | 2.39781E-38 | 3.71661E-36 |
| hESC_H3K27me3_20682450 | 2.69286E-37 | 2.78263E-35 |
| CHiP_SUZ12-18692474    | 3.02417E-32 | 2.34373E-30 |
| CHiP_MTF2-20144788     | 5.57499E-32 | 3.4565E-30  |
| CHiP_EZH2-18974828     | 1.0298E-31  | 5.32065E-30 |
| mESC_H3K9me3_19884255  | 4.45745E-27 | 1.97402E-25 |
| CHiP_JARID2-20064375   | 4.72639E-26 | 1.83148E-24 |
| CHiP_RNF2-22325148     | 4.92907E-25 | 1.69779E-23 |
| CHiP_RNF2-18974828     | 3.7711E-24  | 1.16904E-22 |

**7,599 duplicated regions in the human genome**

## 7,599 duplicated regions in the human genome

### ARCHS4 Tissues 6618 genes

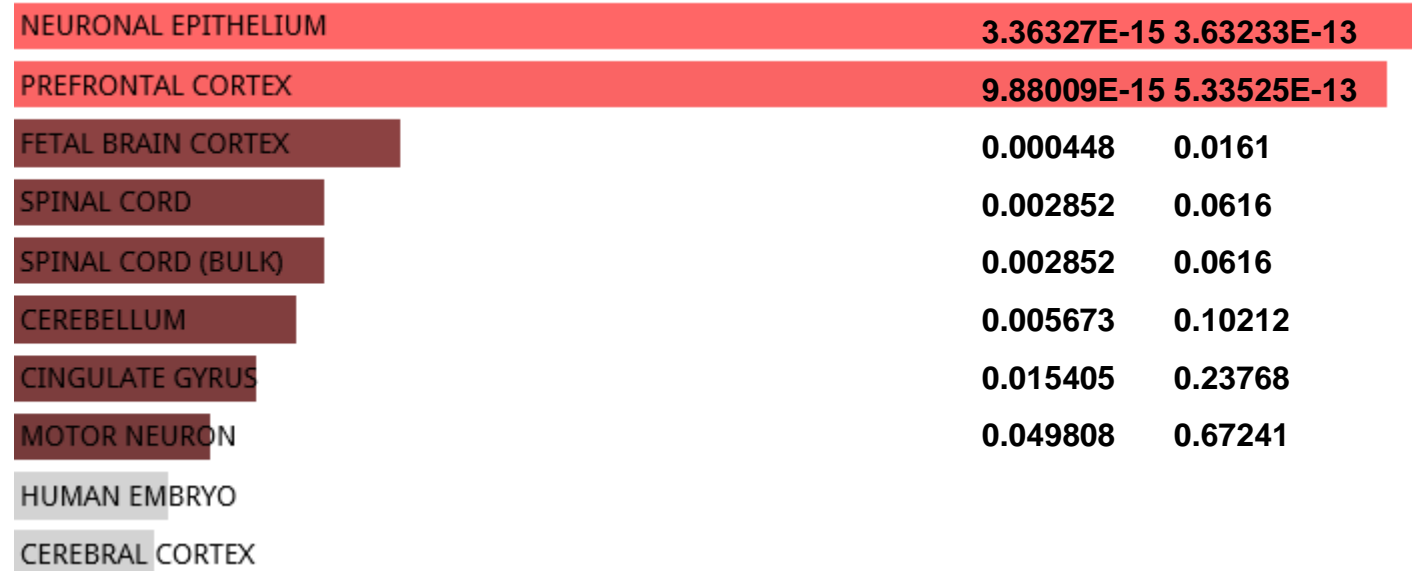

### Jensen TISSUES 6618 genes

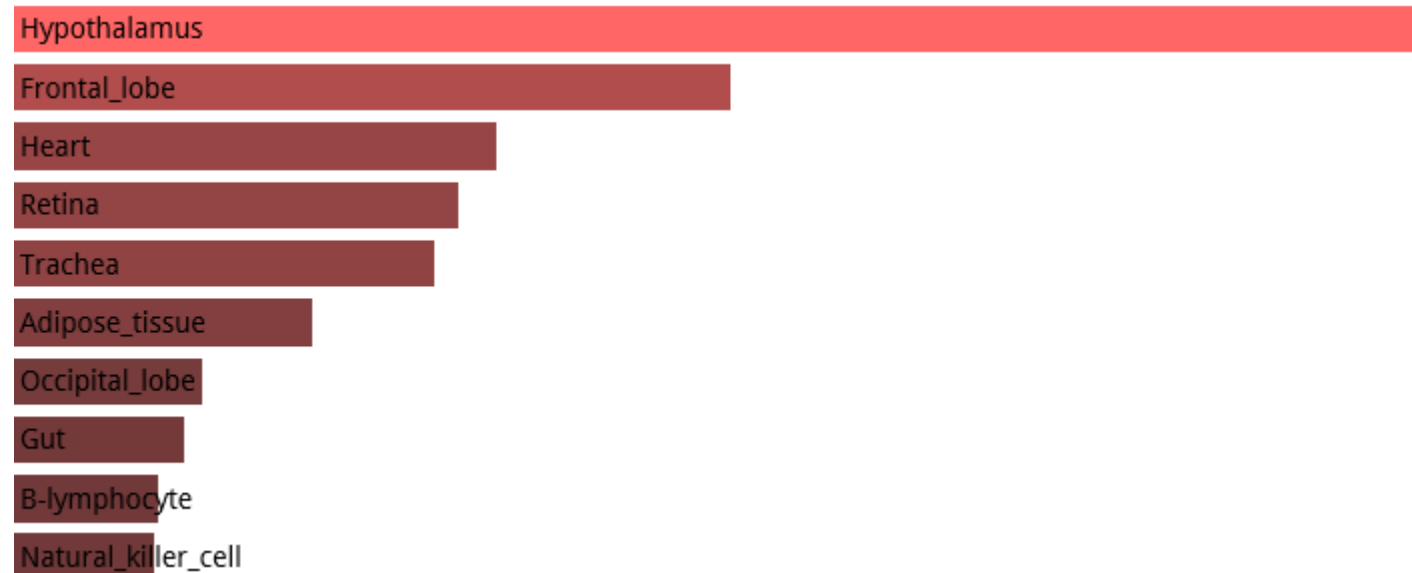

7,599 duplicated regions in the human genome

Jensen DISEASES 6618 genes

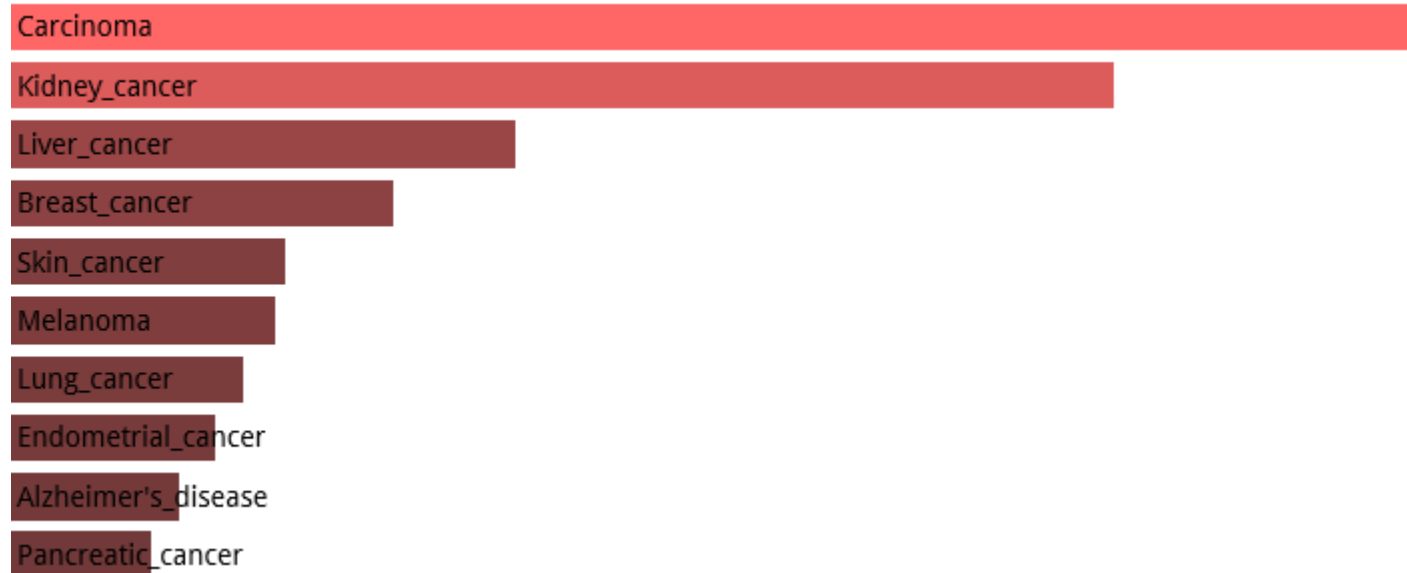

Disease Perturbations from GEO up

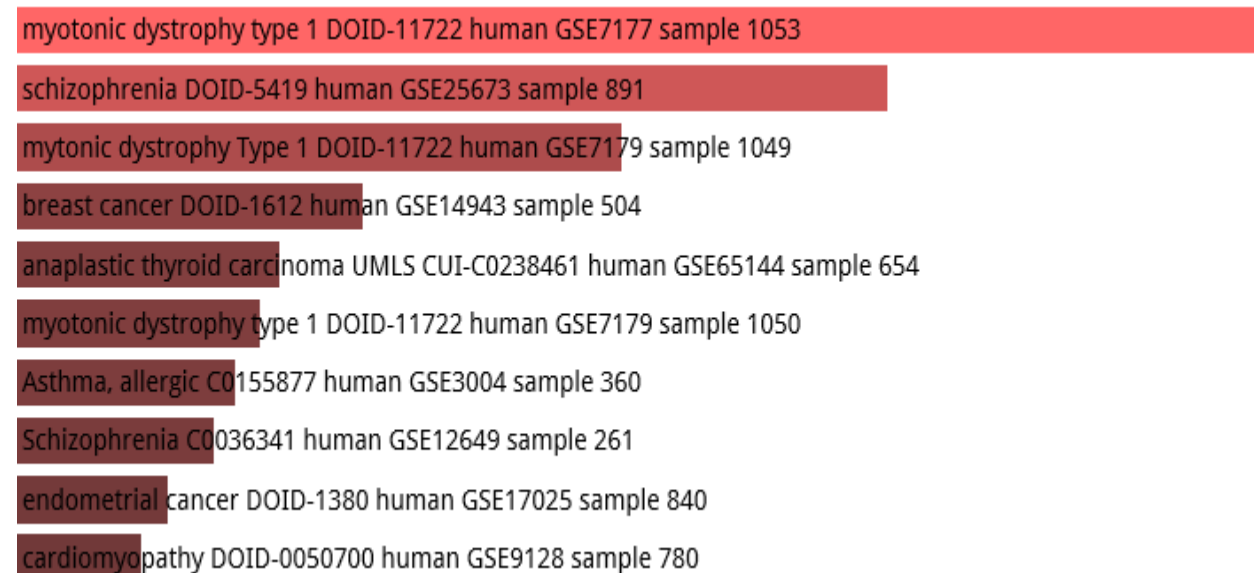

Disease Perturbations from GEO down

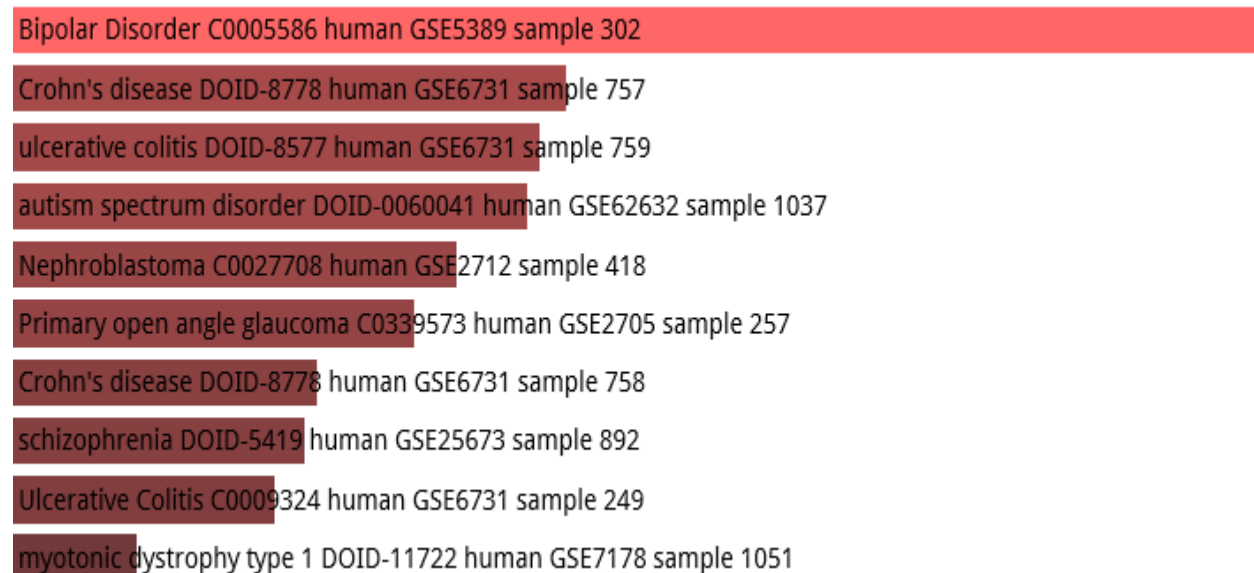



**5,883 fixed human-specific deletions**

# 5,883 fixed human-specific deletions

## ARCHS4 Tissues 5489 genes

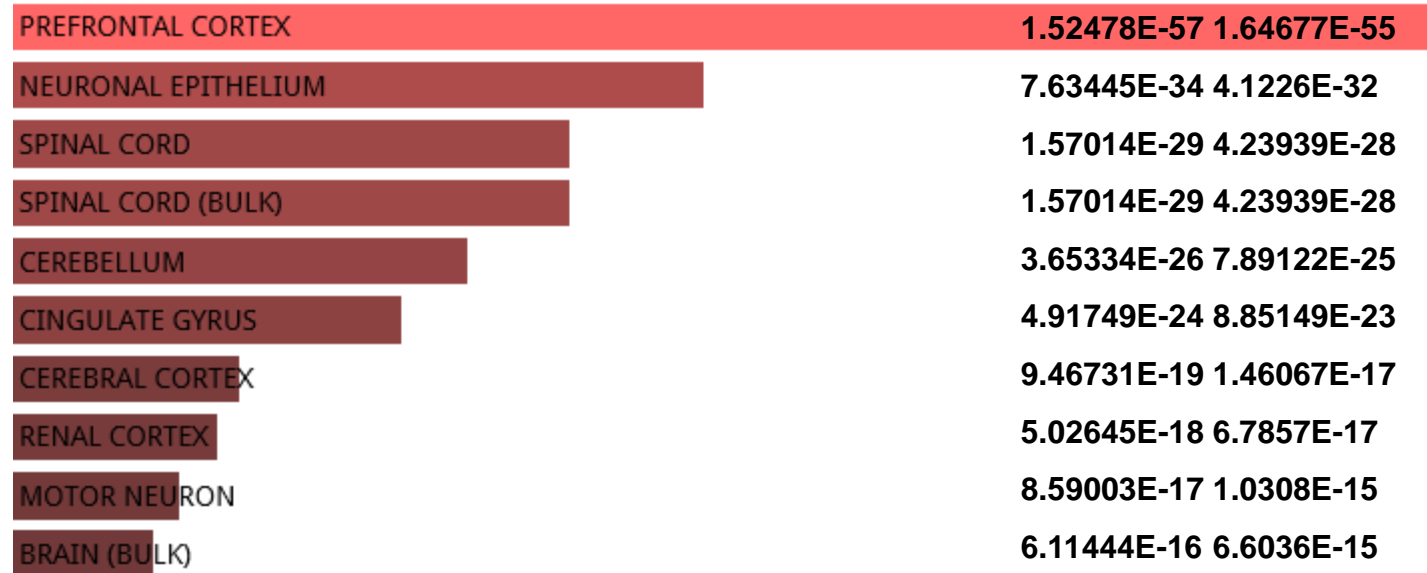

## Jensen TISSUES 5489 genes

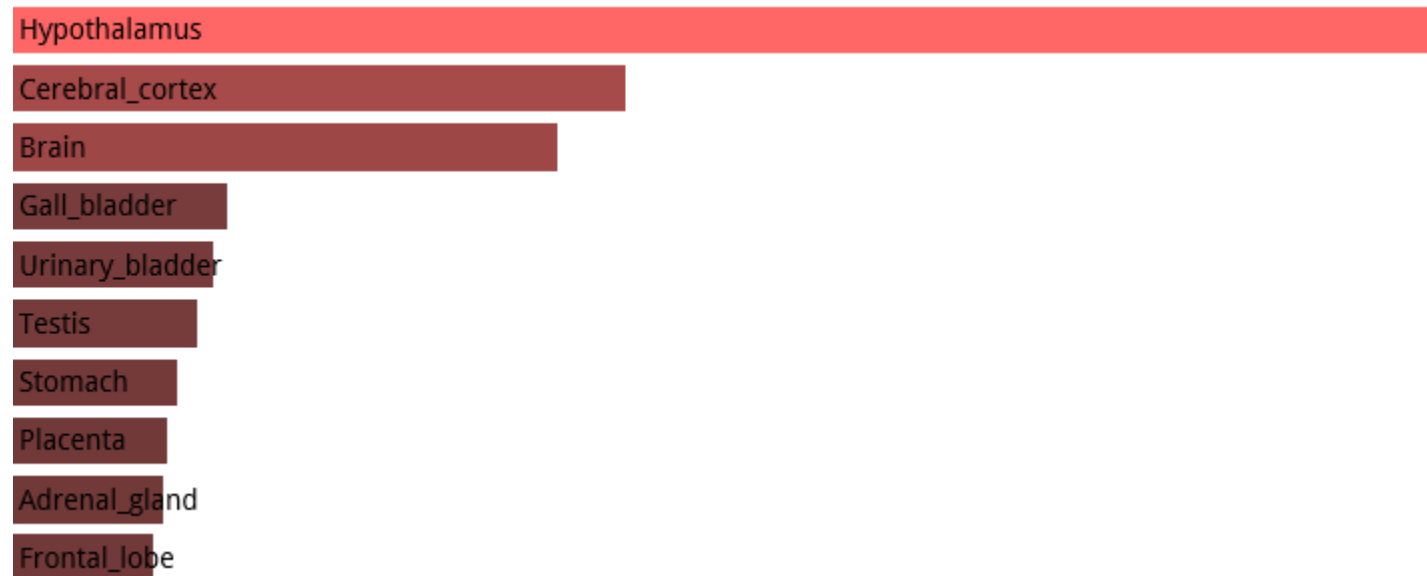

## 5,883 fixed human-specific deletions

## Jensen DISEASES 5489 genes

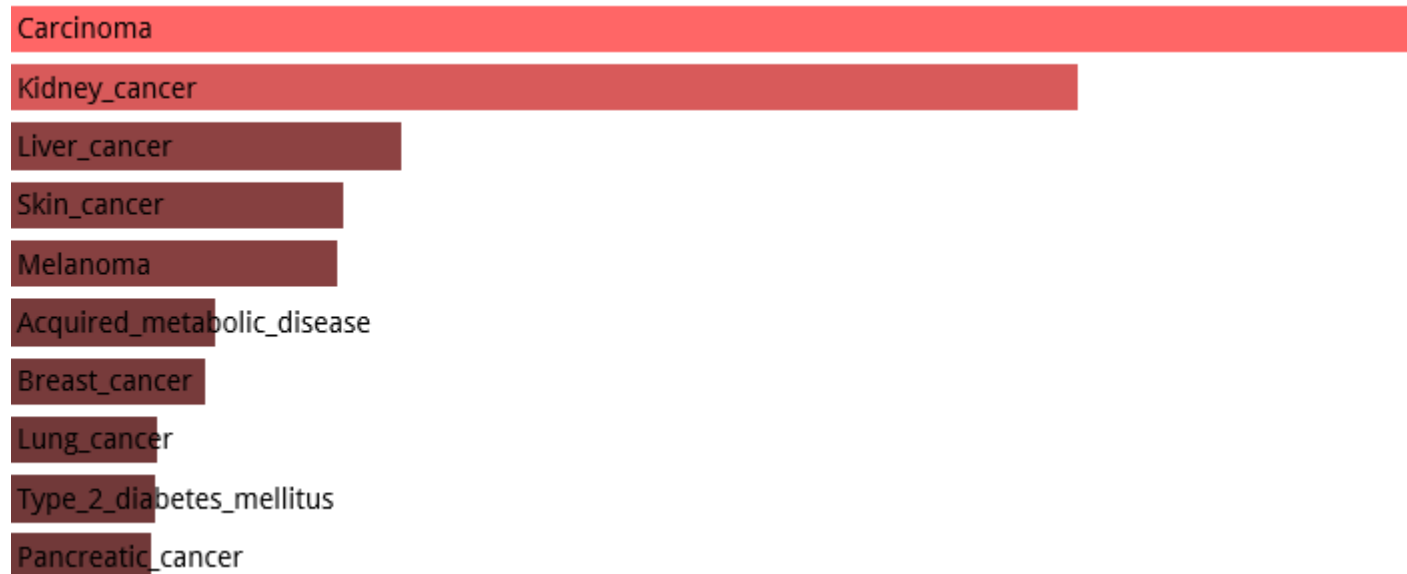

## Disease Perturbations from GEO up

## Disease Perturbations from GEO down

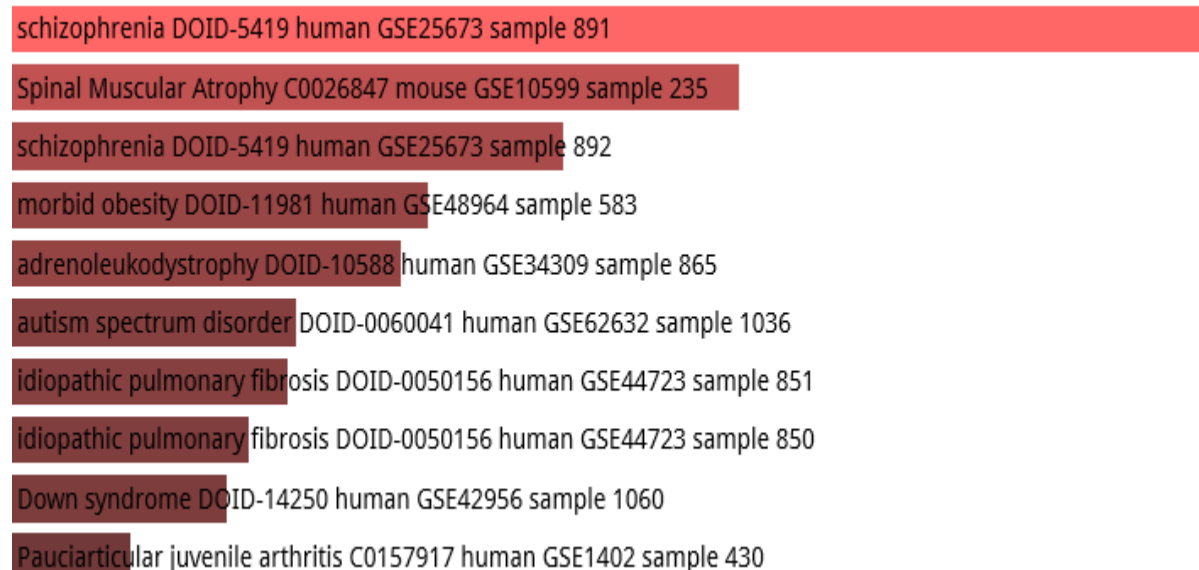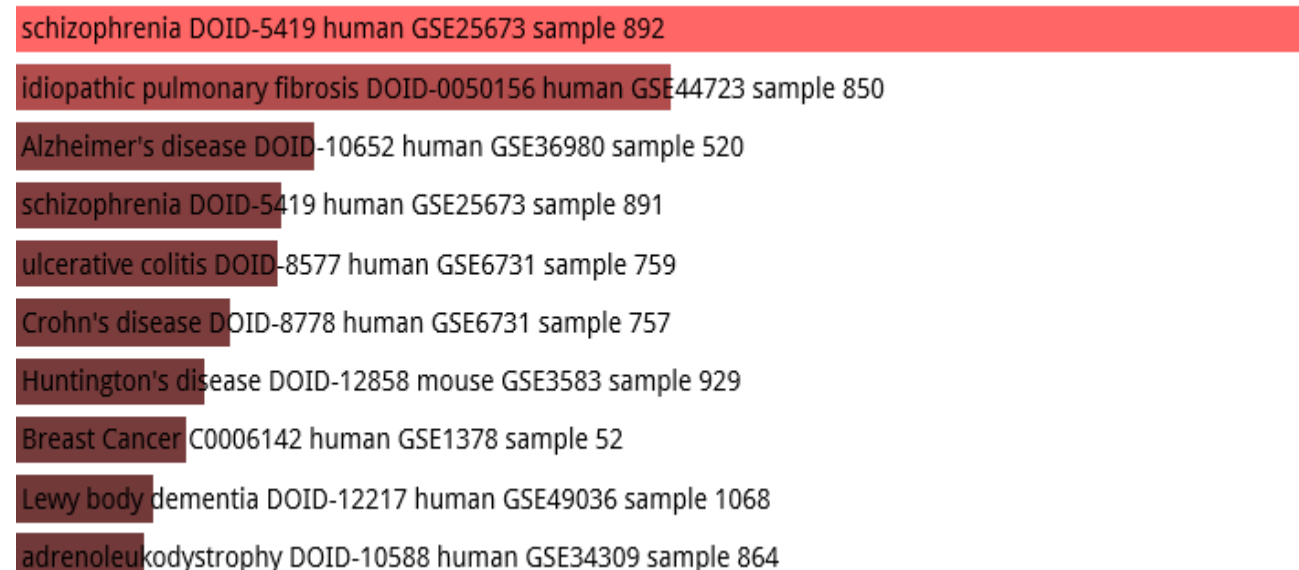

**4,875 human-specific STR expansions**

# 4,875 human-specific STR expansions

## ARCHS4 Tissues 4844 genes

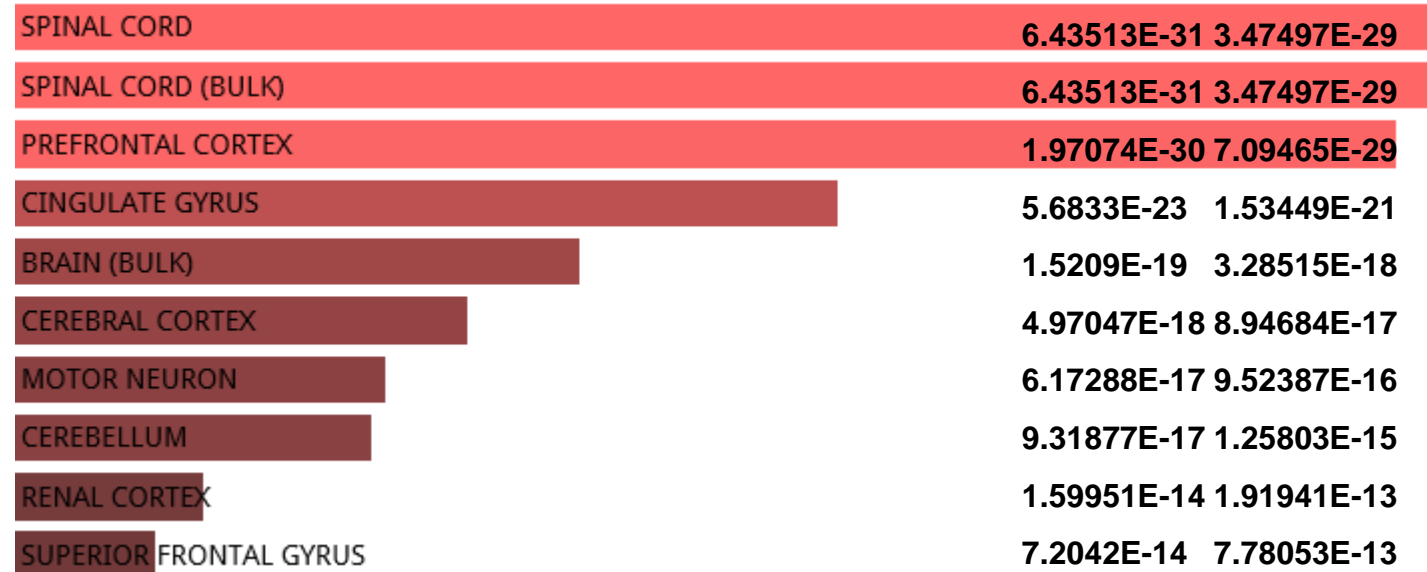

## Jensen TISSUES 4844 genes

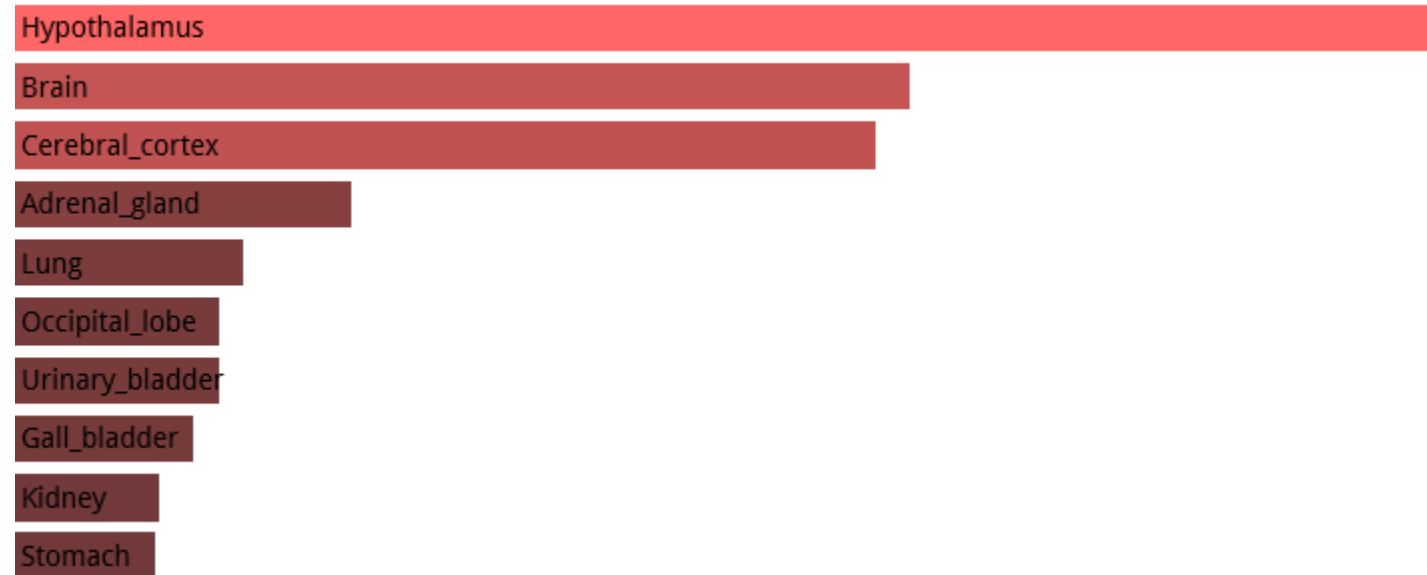

## 4,875 human-specific STR expansions

## Jensen DISEASES 4844 genes

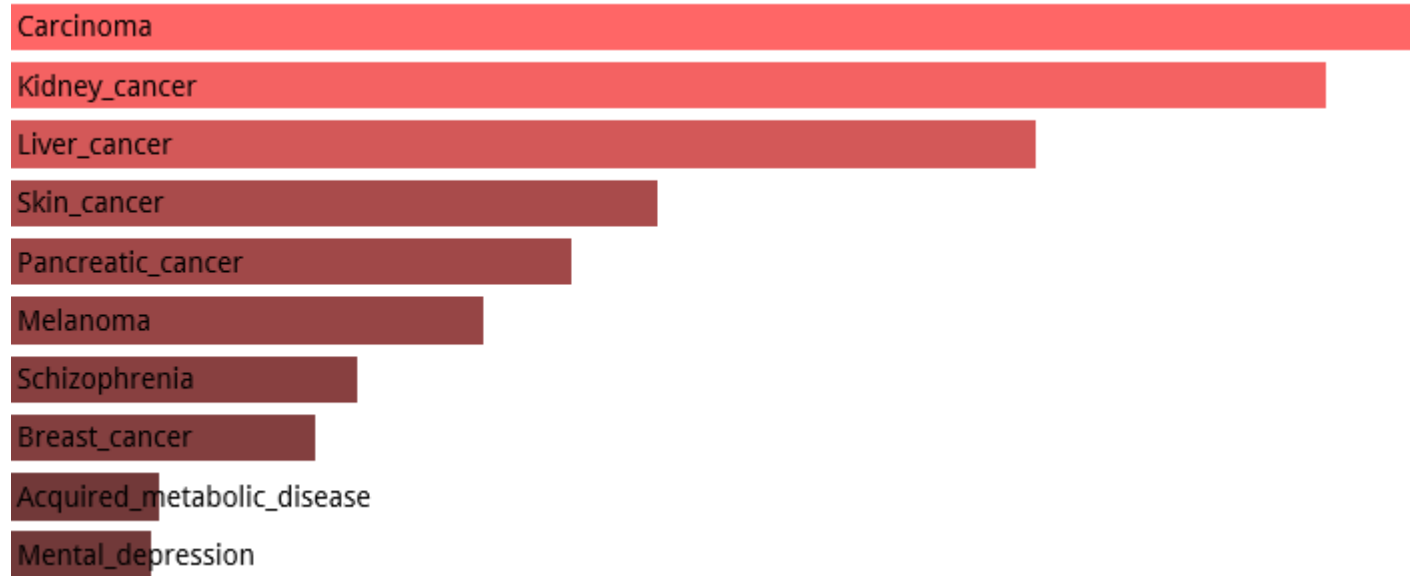

## Disease Perturbations from GEO up

## Disease Perturbations from GEO down

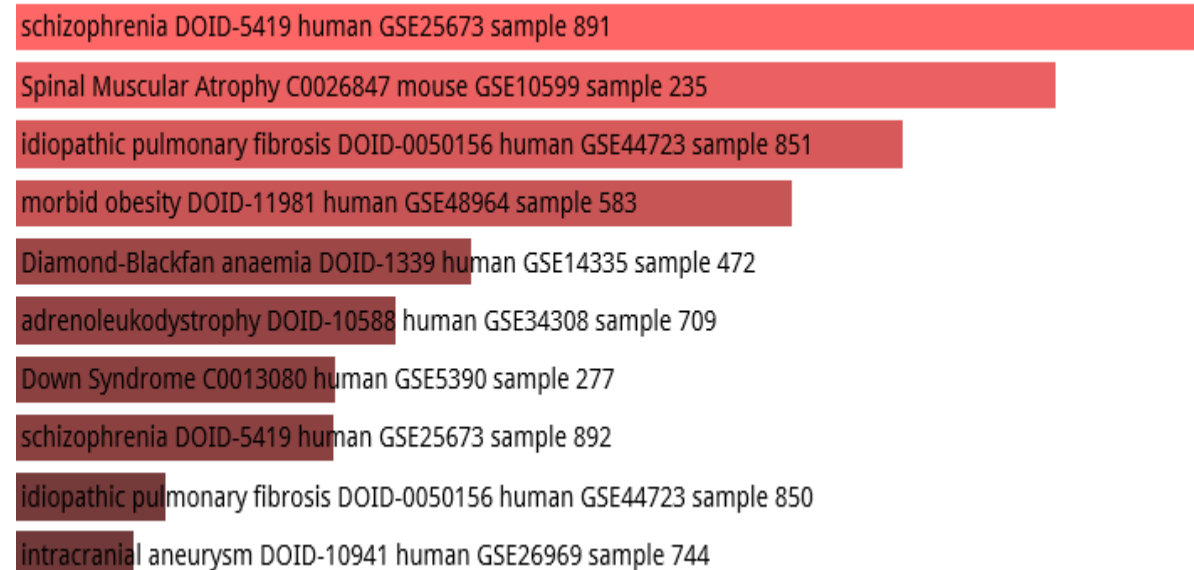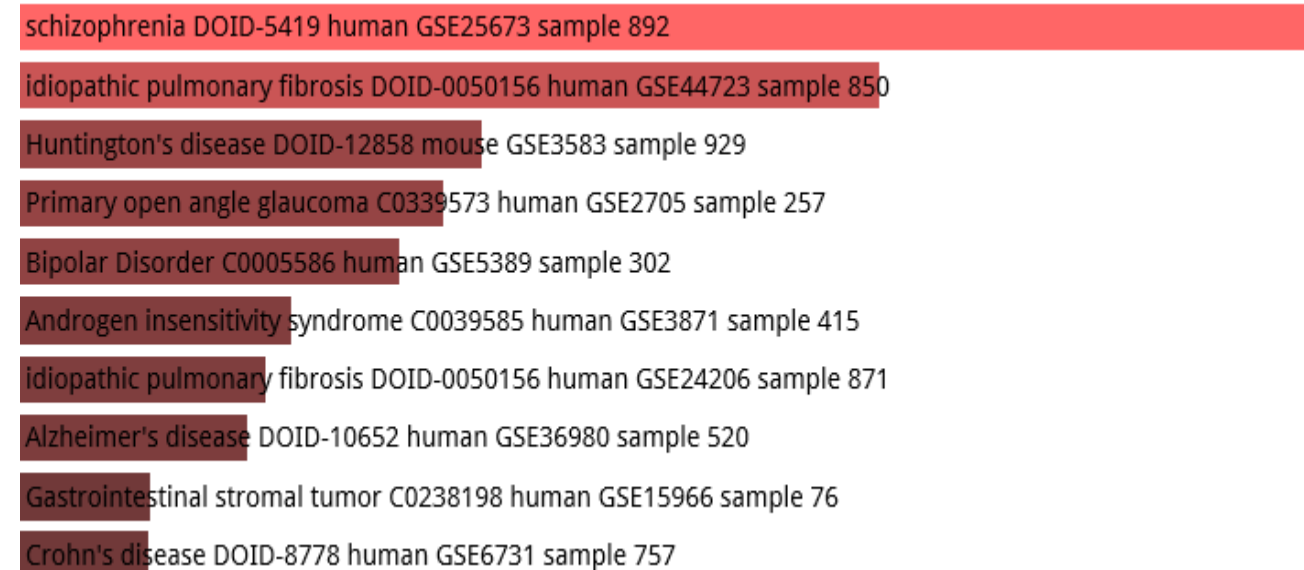

**3,538 human-specific ace-DHS**

### 3,538 human-specific ace-DHS

#### ARCHS4 Tissues 3445 genes

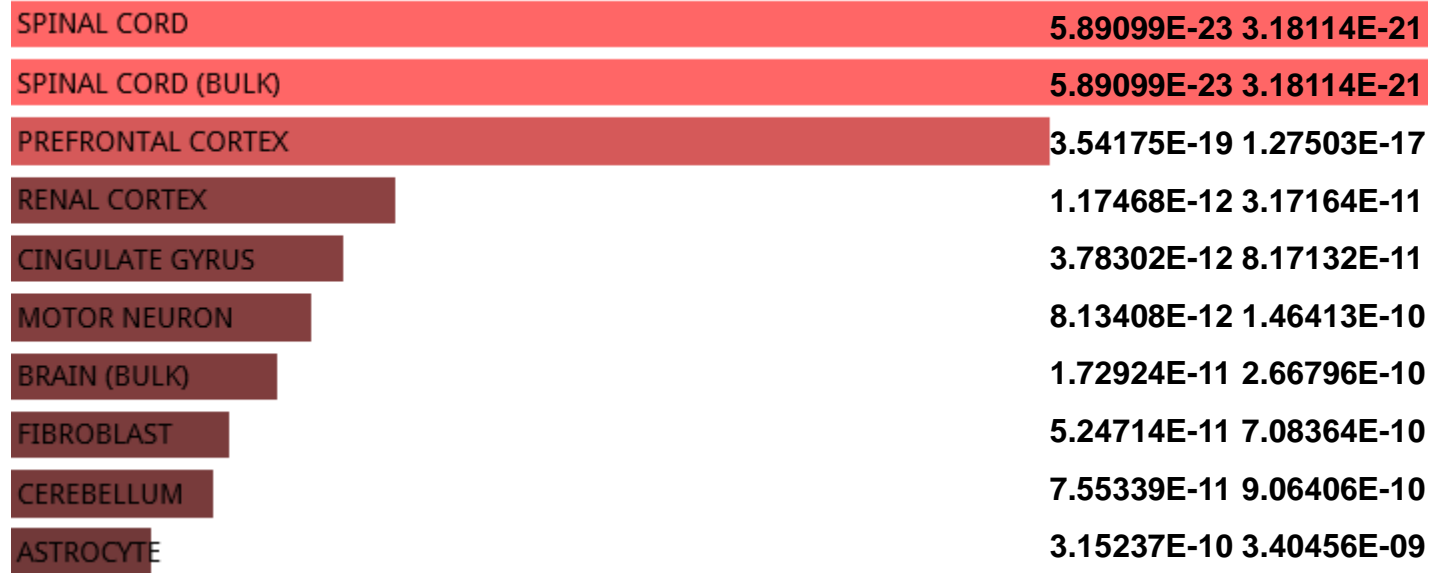

#### Jensen TISSUES 3445 genes

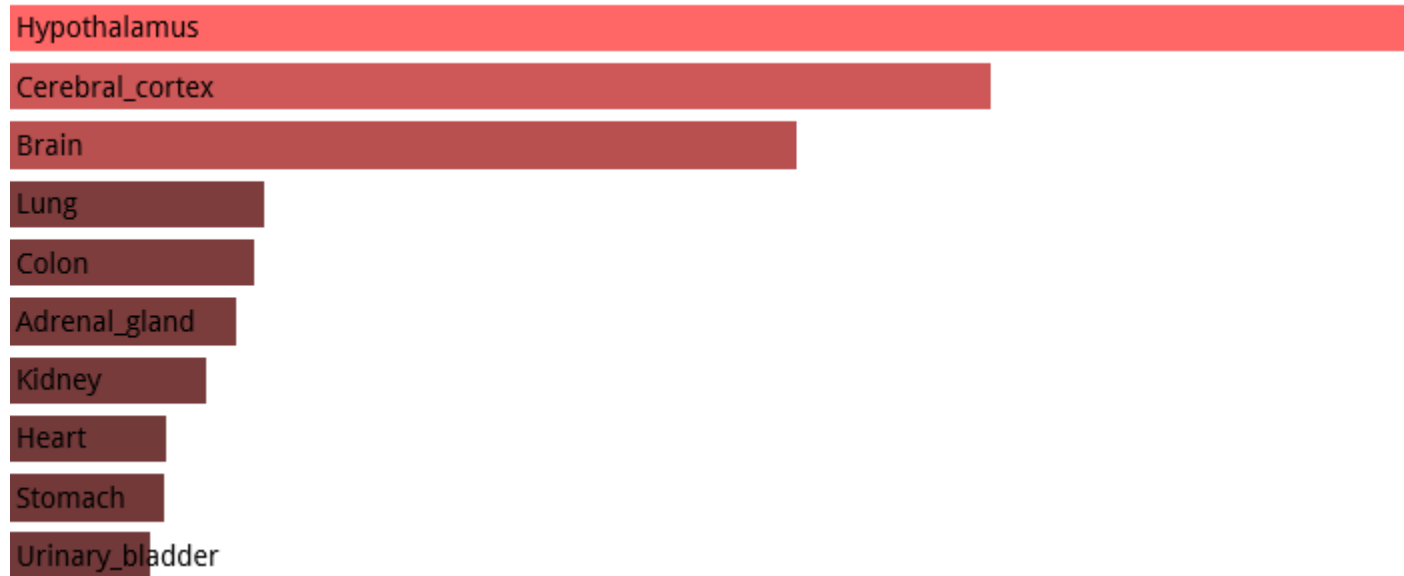



## 3,538 human-specific ace-DHS

## Jensen DISEASES 3445 genes

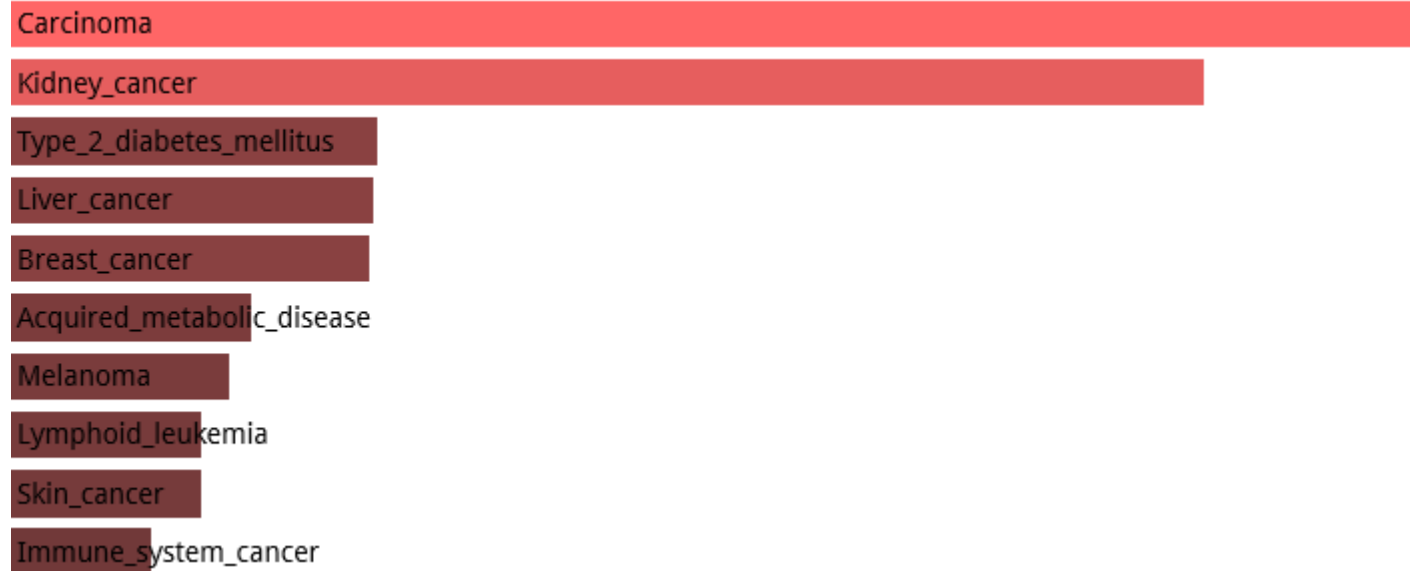

## Disease Perturbations from GEO up

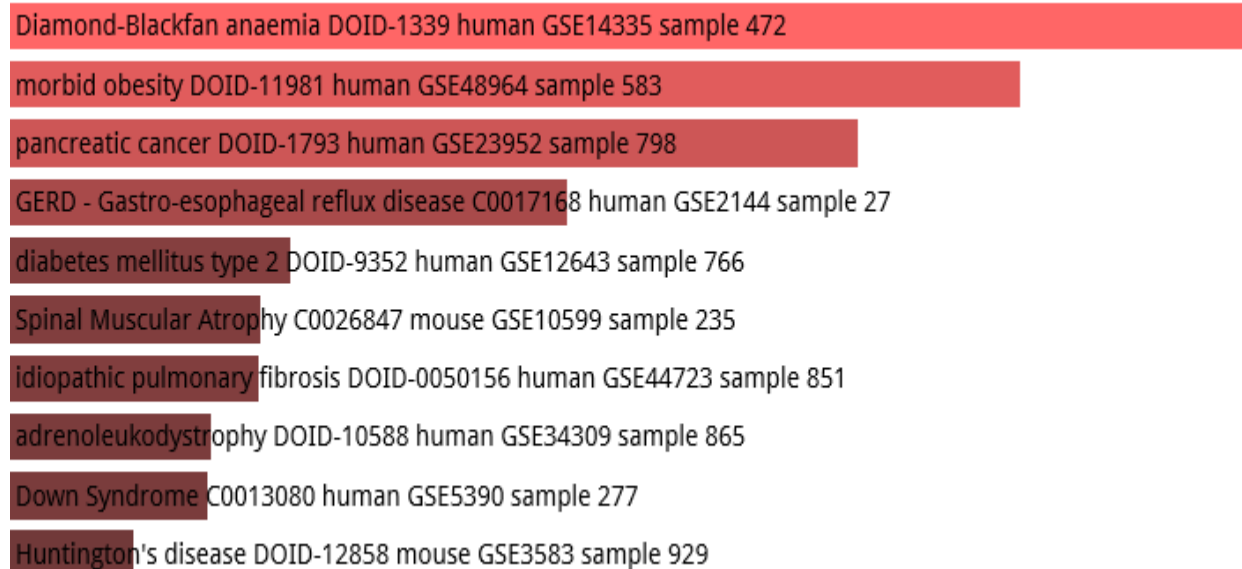

## Disease Perturbations from GEO down

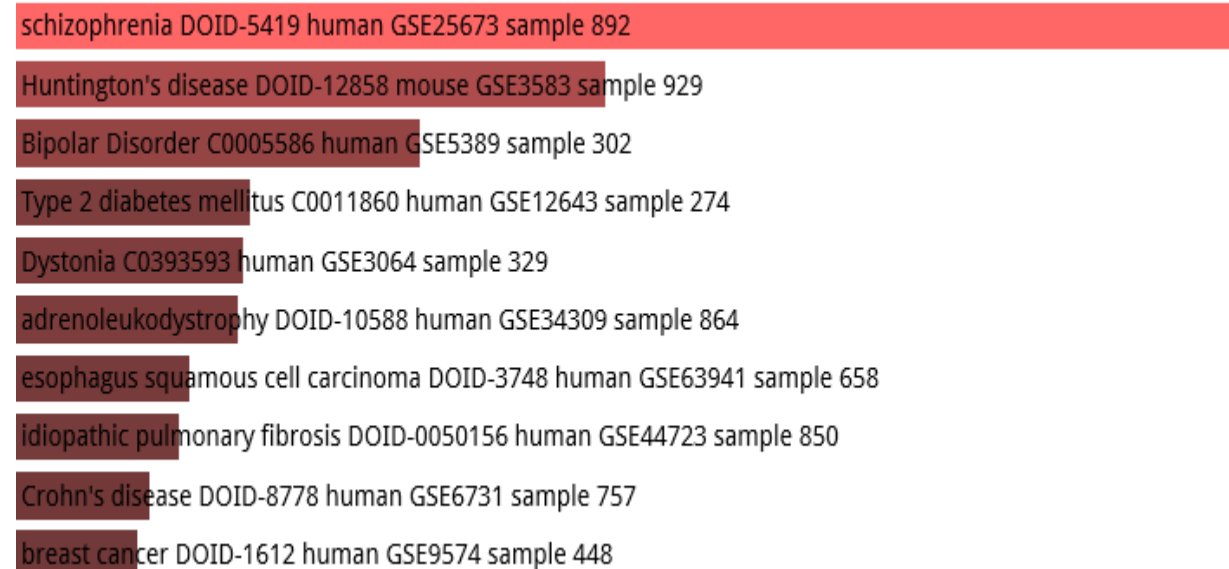

# 3,538 human-specific ace-DHS

## Allen Brain Atlas up 3445 genes

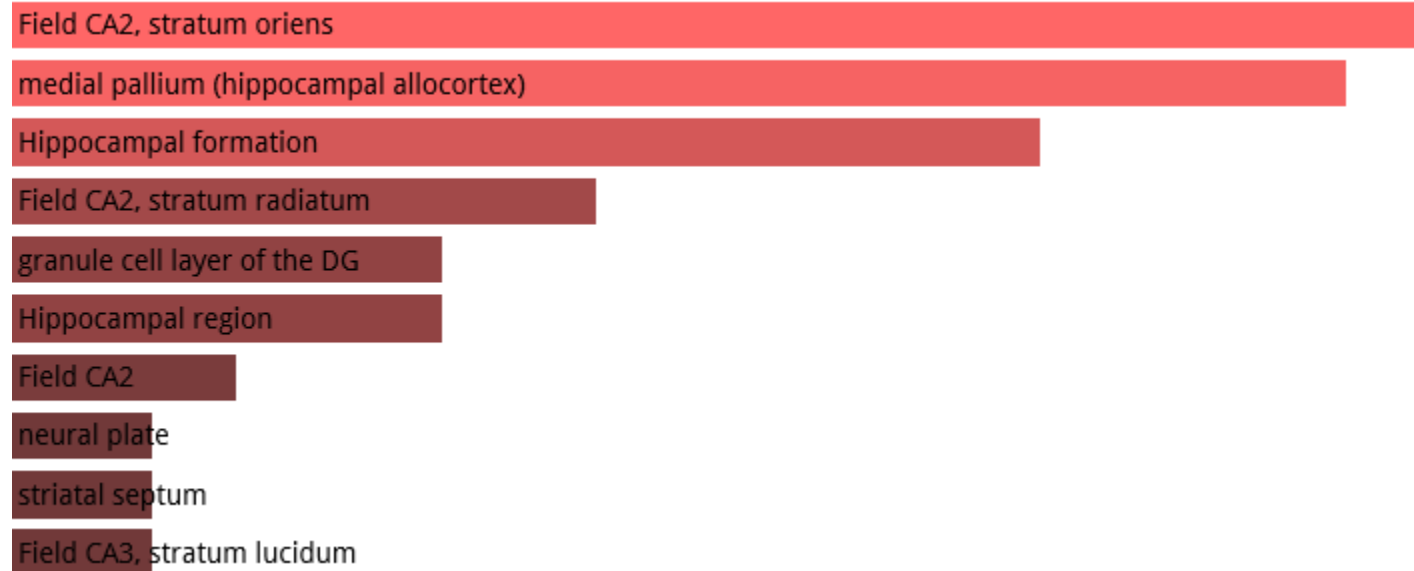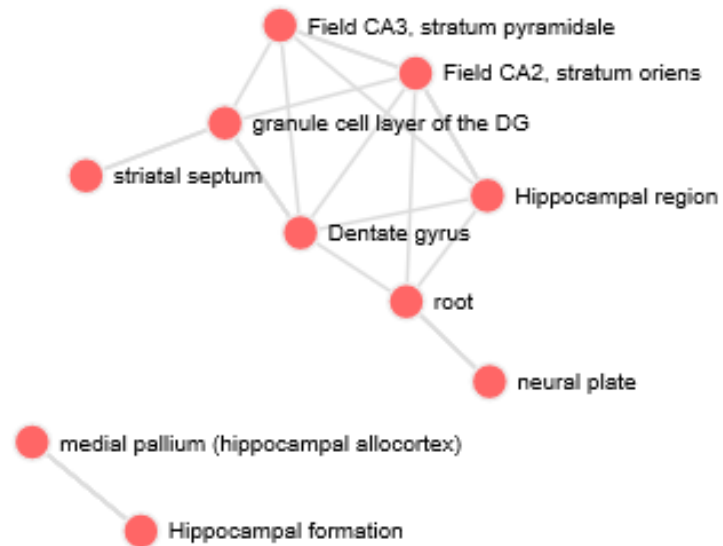

**3,803 human-specific TFBS in hESC**

### 3,803 human-specific TFBS in hESC

#### ARCHS4 Tissues 1087 genes

|                     |             |             |
|---------------------|-------------|-------------|
| PREFRONTAL CORTEX   | 8.51152E-18 | 9.19244E-16 |
| SPINAL CORD         | 3.57976E-17 | 1.28871E-15 |
| SPINAL CORD (BULK)  | 3.57976E-17 | 1.28871E-15 |
| CEREBELLUM          | 2.94817E-16 | 6.36805E-15 |
| CINGULATE GYRUS     | 2.94817E-16 | 6.36805E-15 |
| MOTOR NEURON        | 2.62138E-12 | 4.71848E-11 |
| NEURONAL EPITHELIUM | 8.6747E-12  | 1.33838E-10 |
| SENSORY NEURON      | 2.7969E-11  | 3.35628E-10 |
| CEREBRAL CORTEX     | 2.7969E-11  | 3.35628E-10 |
| DORSAL STRIATUM     | 2.68742E-10 | 2.63856E-09 |

#### Jensen TISSUES 1087 genes

|                          |  |  |
|--------------------------|--|--|
| Hypothalamus             |  |  |
| Adult                    |  |  |
| Ganglion                 |  |  |
| Cerebellar_Purkinje_cell |  |  |
| Neural_stem_cell         |  |  |
| Neural_tube              |  |  |
| Lumbar_spine             |  |  |
| dg1                      |  |  |
| nt2d1                    |  |  |
| Ec                       |  |  |

## 3,803 human-specific TFBS in hESC

## Jensen DISEASES 1087 genes

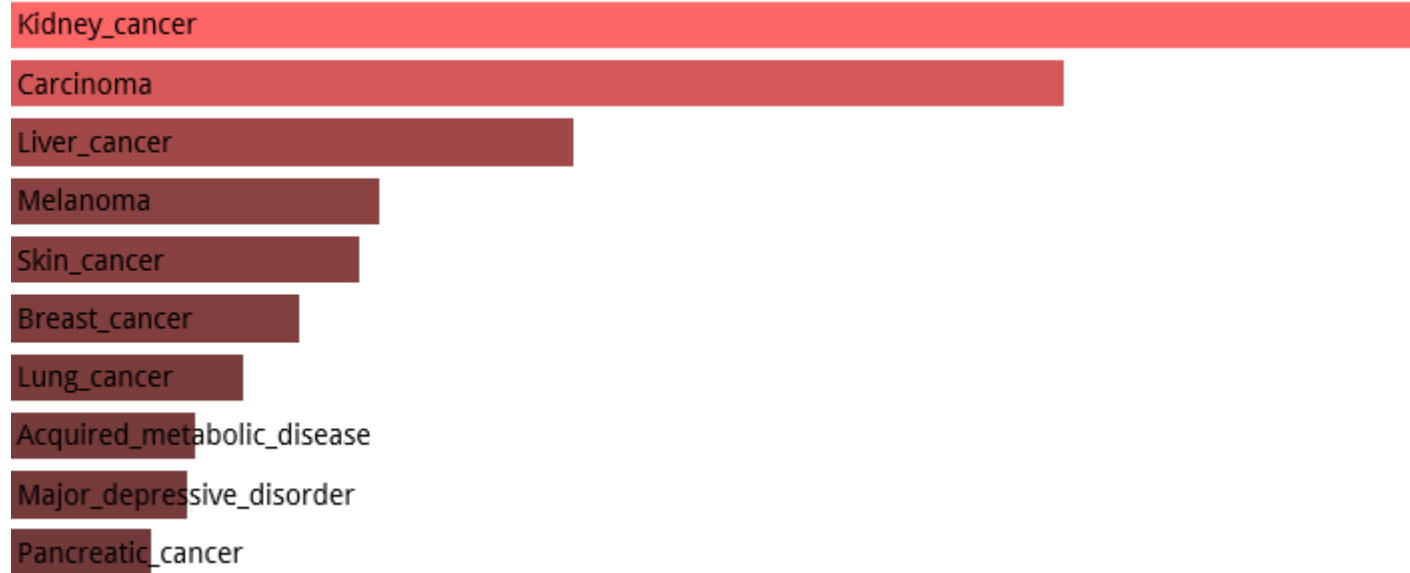

## Disease Perturbations from GEO up

## Disease Perturbations from GEO down

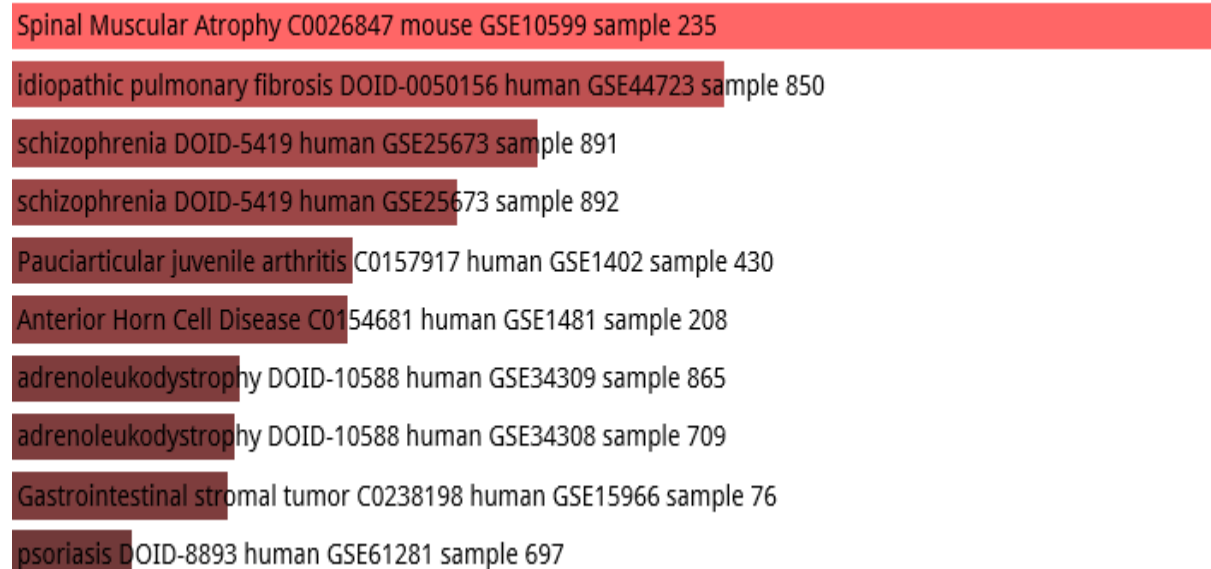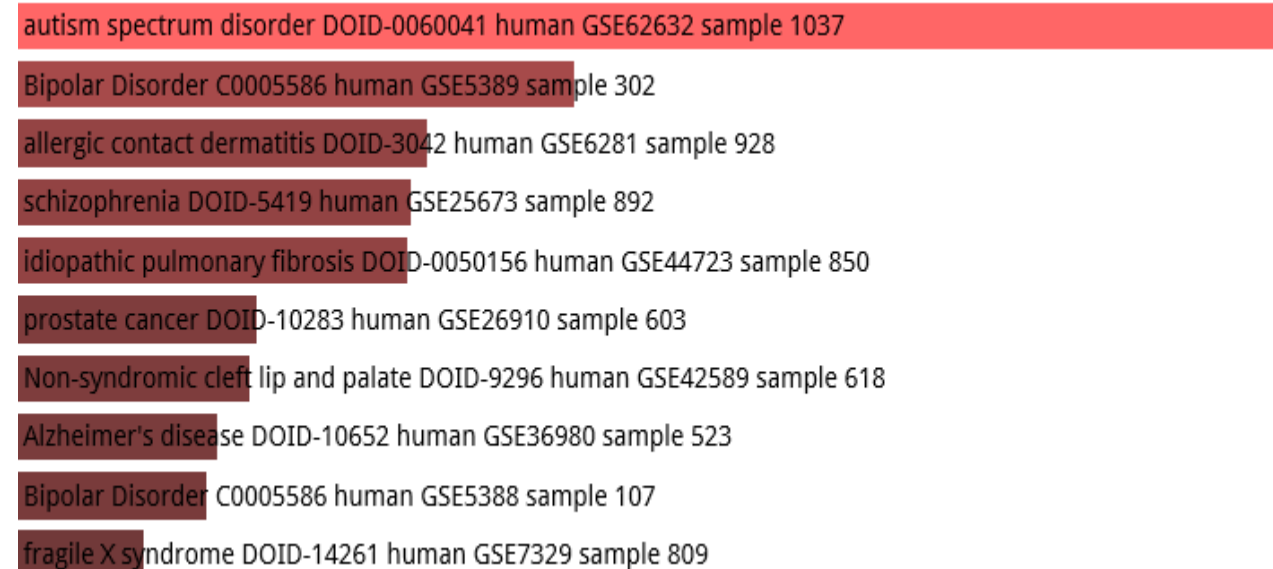

**4,249 fixed human-specific regulatory loci**

## 4,249 fixed human-specific regulatory loci

### ARCHS4 Tissues 2810 genes

|                     |             |             |
|---------------------|-------------|-------------|
| PREFRONTAL CORTEX   | 3.47228E-19 | 3.75007E-17 |
| NEURONAL EPITHELIUM | 3.67273E-13 | 1.98328E-11 |
| SPINAL CORD         | 7.7021E-11  | 2.07957E-09 |
| SPINAL CORD (BULK)  | 7.7021E-11  | 2.07957E-09 |
| MOTOR NEURON        | 2.44617E-10 | 5.28373E-09 |
| CEREBELLUM          | 5.19957E-10 | 9.35923E-09 |
| CINGULATE GYRUS     | 2.2585E-09  | 3.48455E-08 |
| SENSORY NEURON      | 2.54348E-07 | 3.43369E-06 |
| RENAL CORTEX        | 8.70052E-07 | 1.04406E-05 |
| FETAL BRAIN CORTEX  | 2.11278E-06 | 2.2818E-05  |

### Jensen TISSUES 2810 genes

|                 |  |  |
|-----------------|--|--|
| Hypothalamus    |  |  |
| Brain           |  |  |
| Cerebral_cortex |  |  |
| Testis          |  |  |
| Colon           |  |  |
| Ovary           |  |  |
| Cardiac_muscle  |  |  |
| Urinary_bladder |  |  |
| Gall_bladder    |  |  |
| Heart           |  |  |

4,249 fixed human-specific regulatory loci

Jensen DISEASES 2810 genes

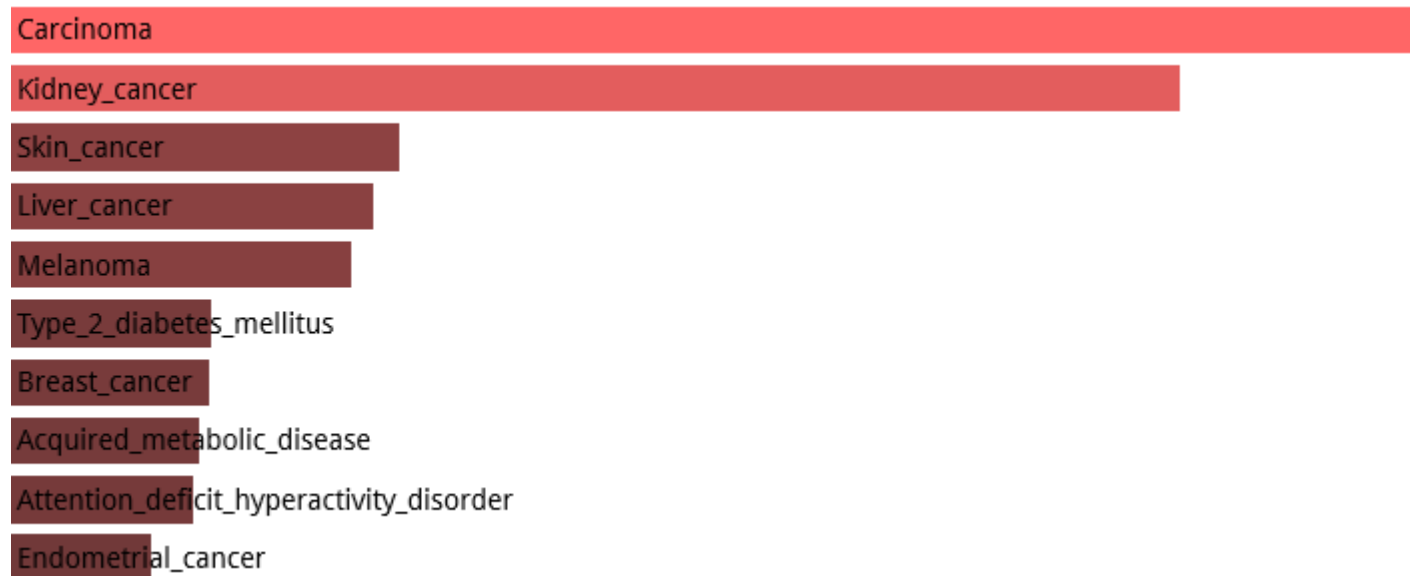

Disease Perturbations from GEO up

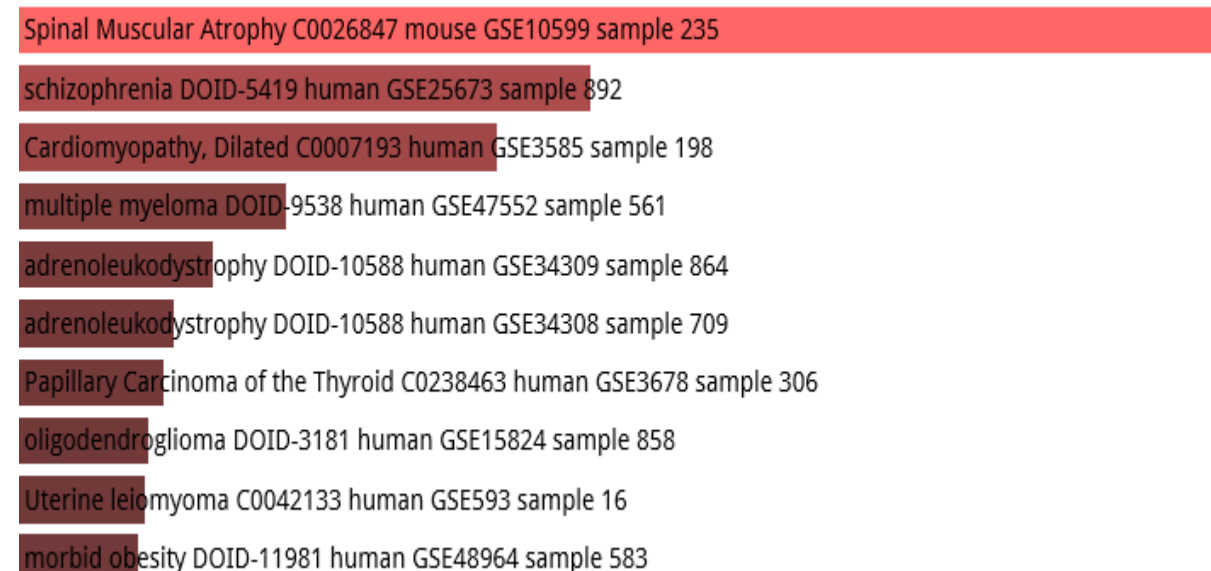

Disease Perturbations from GEO down

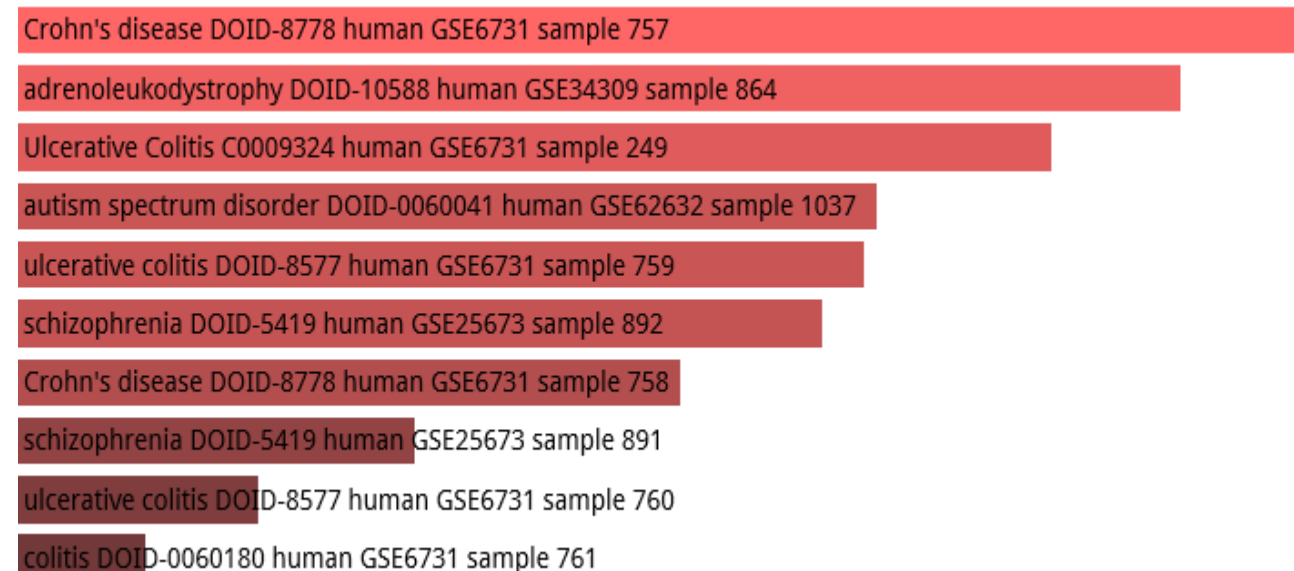



**2,745 human accelerated regions**

## 2,745 human accelerated regions

### ARCHS4 Tissues 2281 genes

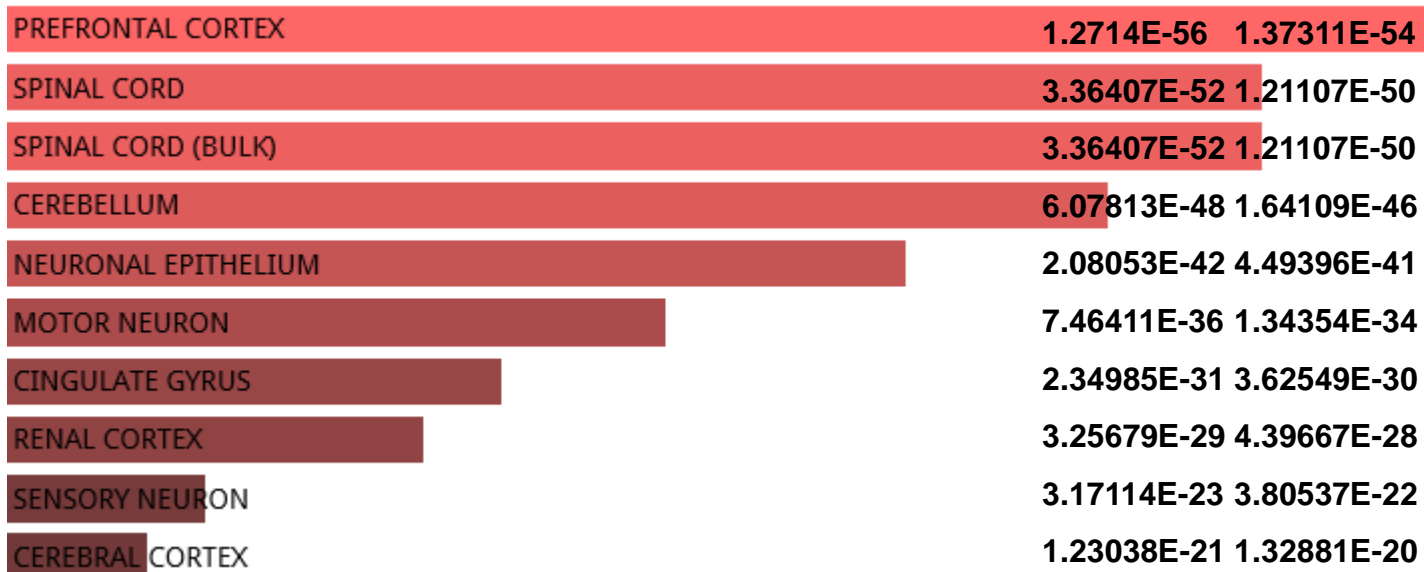

### Jensen TISSUES 2281 genes

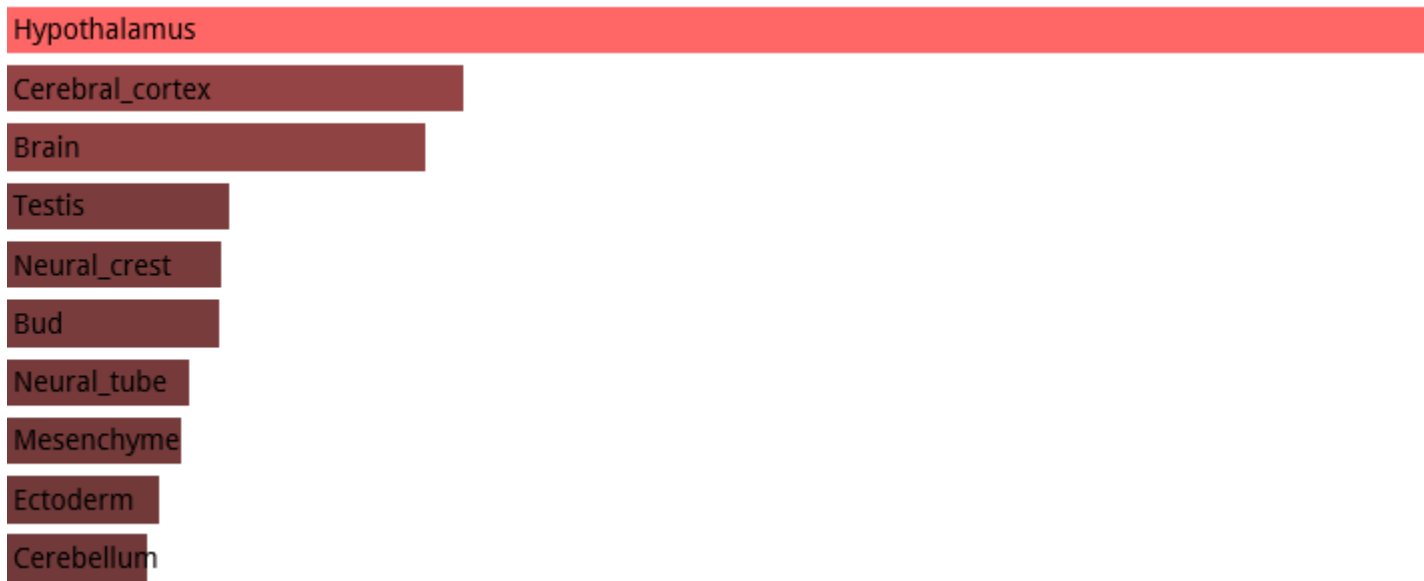

2,745 human accelerated regions

Jensen DISEASES 2281 genes

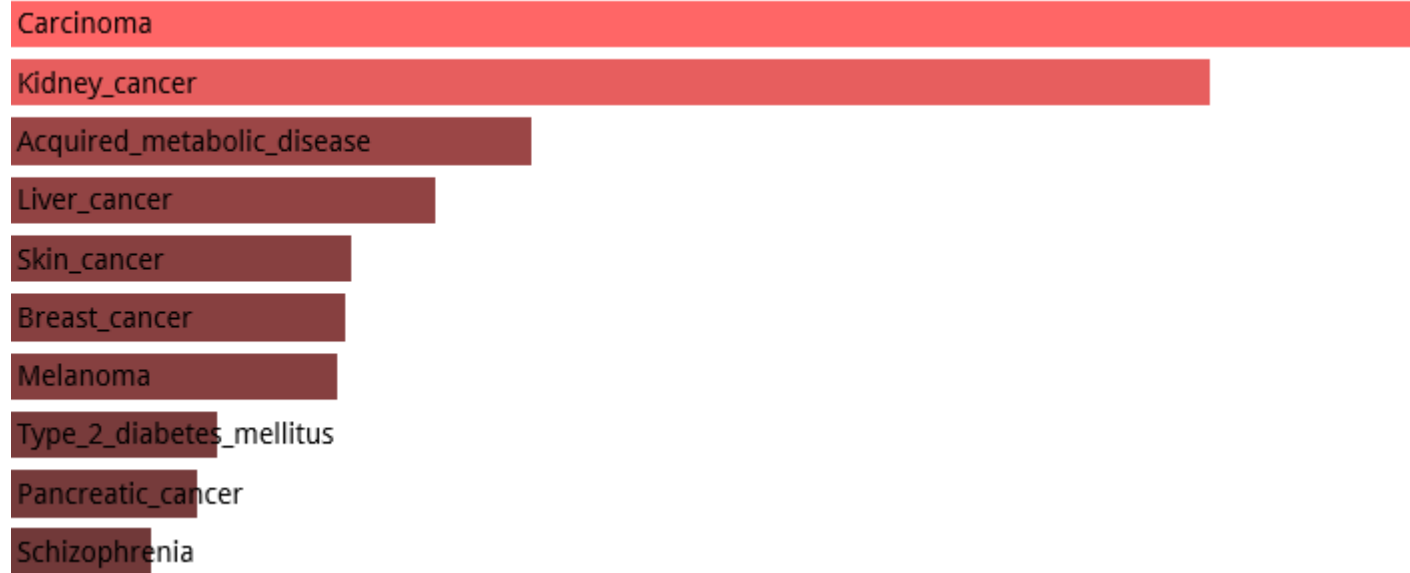

Disease Perturbations from GEO up

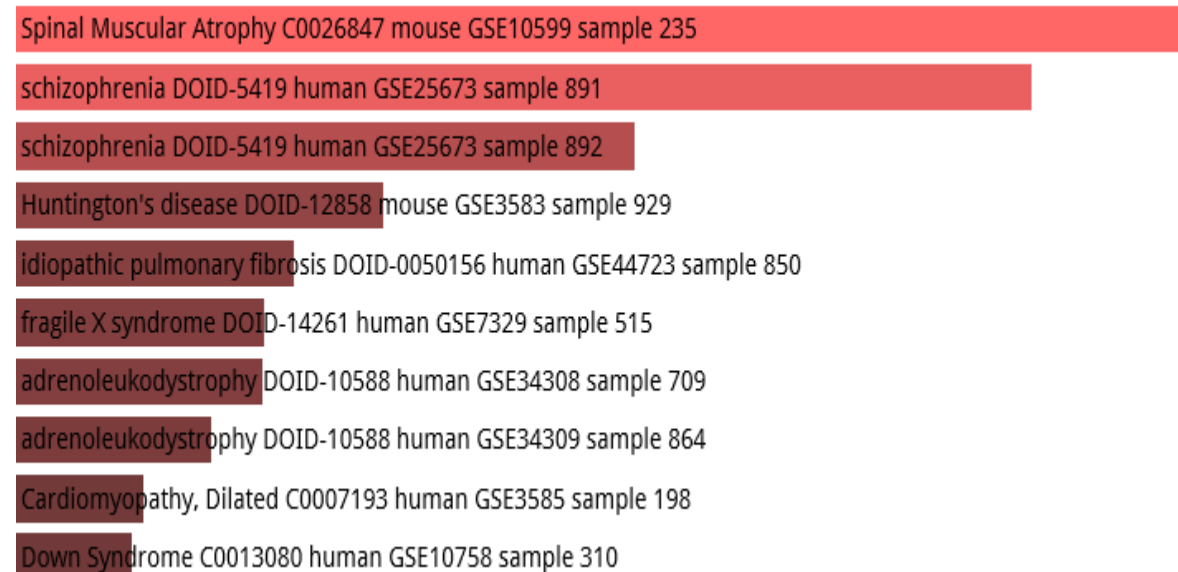

Disease Perturbations from GEO down

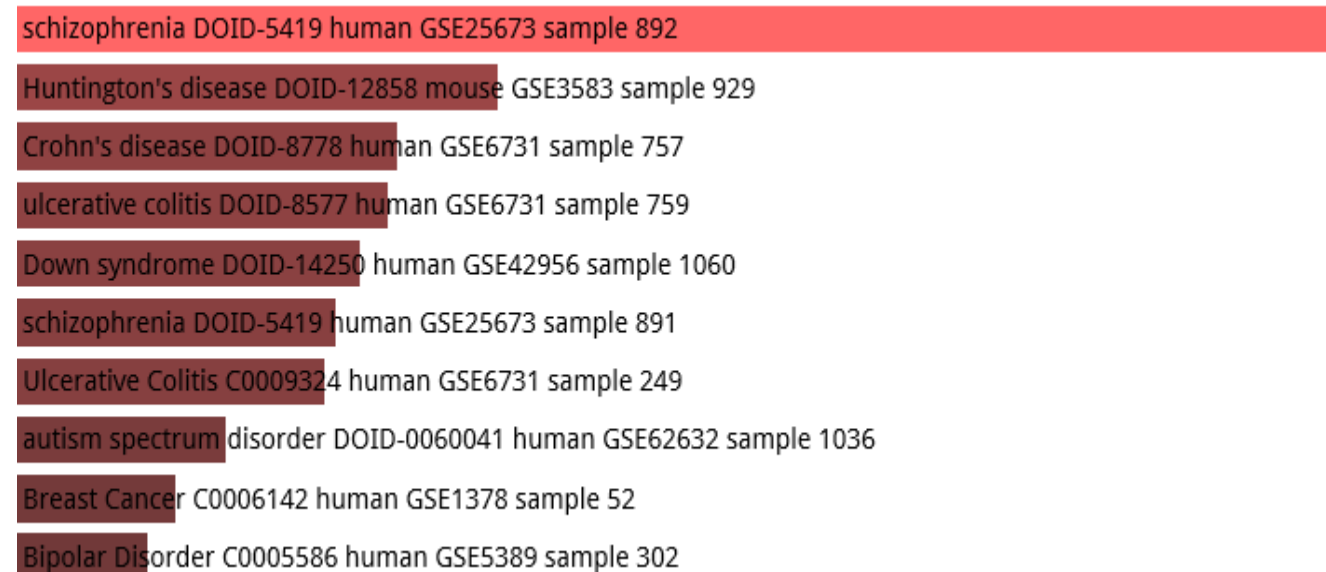

**1,932 fixed human-specific regulatory regions  
(hESC DHS)**

# 1,932 fixed human-specific regulatory regions (hESC DHS)

## ARCHS4 Tissues 1458 genes

|                      |             |             |
|----------------------|-------------|-------------|
| PREFRONTAL CORTEX    | 5.87167E-35 | 6.34141E-33 |
| CINGULATE GYRUS      | 2.10798E-29 | 1.13831E-27 |
| CEREBELLUM           | 1.07388E-28 | 3.86597E-27 |
| SPINAL CORD          | 2.40716E-28 | 5.19946E-27 |
| SPINAL CORD (BULK)   | 2.40716E-28 | 5.19946E-27 |
| MOTOR NEURON         | 5.19032E-23 | 9.34258E-22 |
| DORSAL STRIATUM      | 3.04713E-20 | 4.70128E-19 |
| SENSORY NEURON       | 1.19152E-19 | 1.60855E-18 |
| CEREBRAL CORTEX      | 4.5693E-19  | 5.48316E-18 |
| DENTATE GRANULE CELL | 6.33607E-18 | 6.84295E-17 |

## Jensen TISSUES 1458 genes

|                       |  |  |
|-----------------------|--|--|
| Hypothalamus          |  |  |
| Cerebral_cortex       |  |  |
| Brain                 |  |  |
| Ganglion              |  |  |
| Neural_crest          |  |  |
| Mesenchyme            |  |  |
| Adult                 |  |  |
| Ear                   |  |  |
| Mesenchymal_stem_cell |  |  |
| 3T3-L1_cell           |  |  |

## 1,932 fixed human-specific regulatory regions (hESC DHS)

## Jensen DISEASES 1458 genes

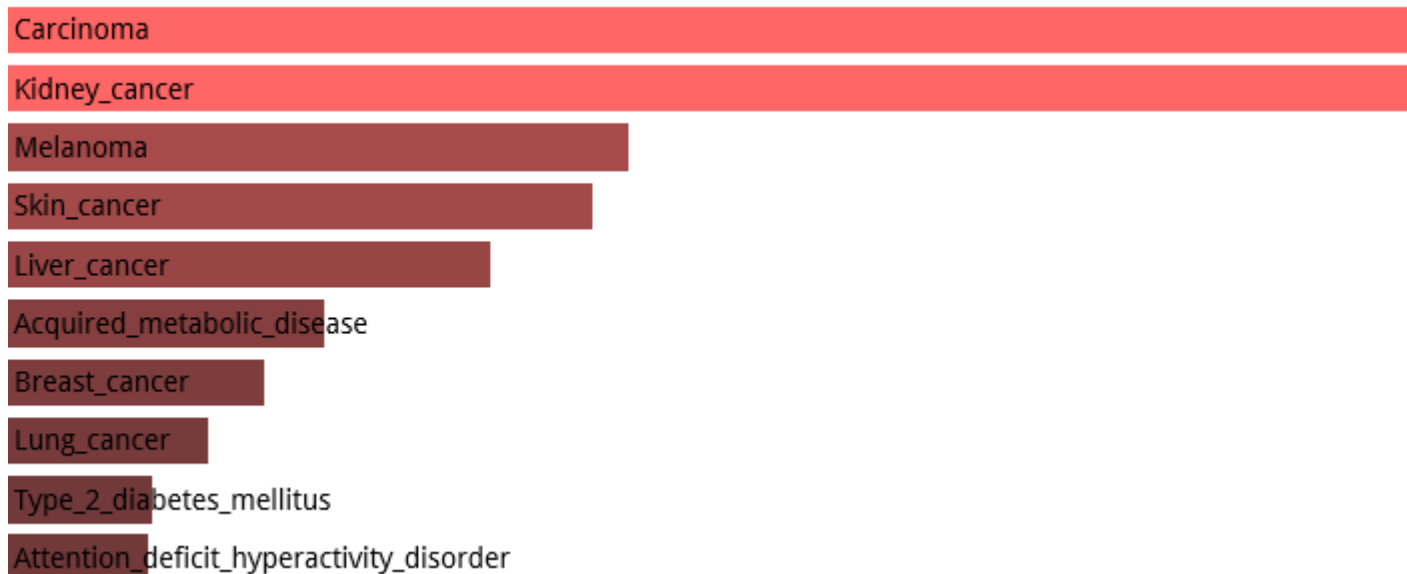

## Disease Perturbations from GEO up

## Disease Perturbations from GEO down

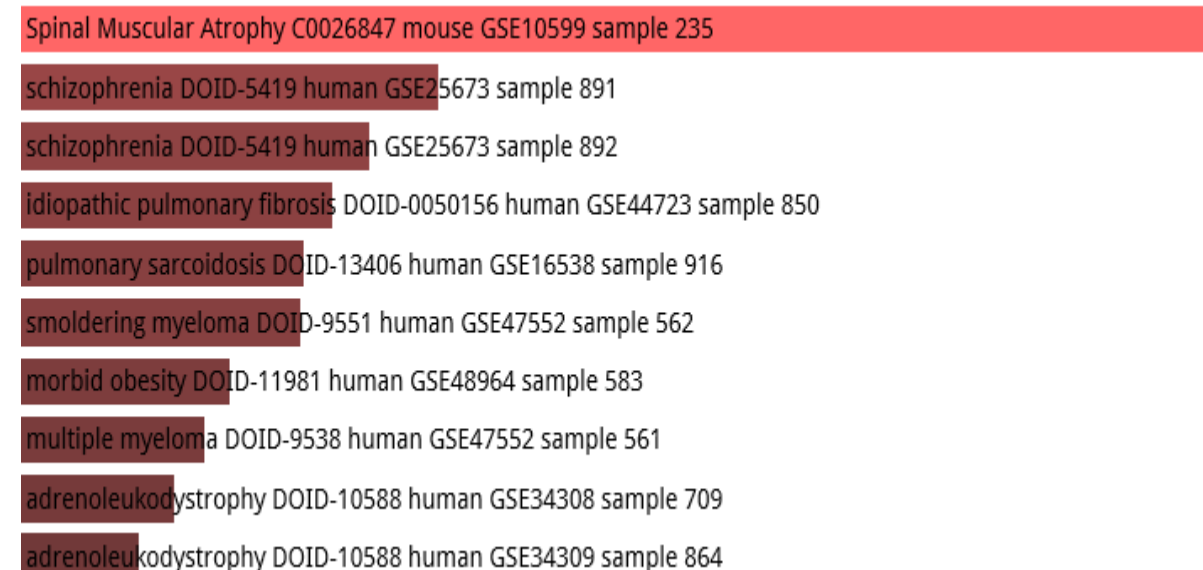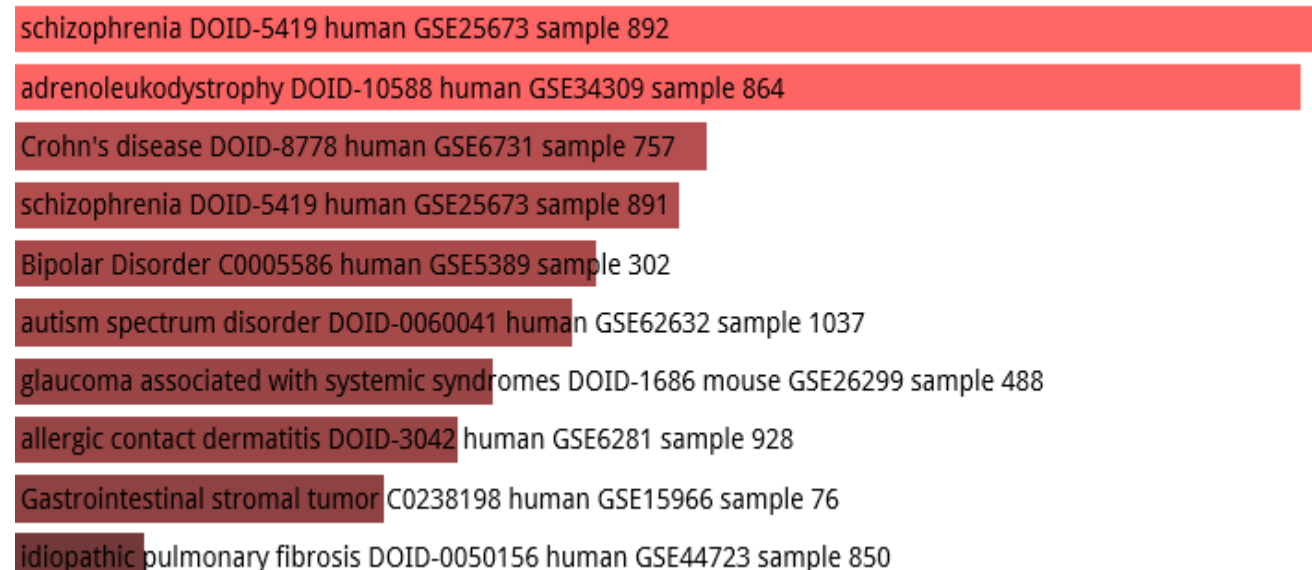

**1,000 human-biased cranial neural  
crest cells (CNCCs) enhancers**

# 1,000 human-biased cranial neural crest cells (CNCCs) enhancers

## ARCHS4 Tissues 1439 genes

|                     |             |             |
|---------------------|-------------|-------------|
| PREFRONTAL CORTEX   | 5.00308E-22 | 5.40332E-20 |
| SPINAL CORD         | 7.24755E-18 | 2.60912E-16 |
| SPINAL CORD (BULK)  | 7.24755E-18 | 2.60912E-16 |
| CEREBELLUM          | 1.1175E-15  | 3.01725E-14 |
| CINGULATE GYRUS     | 2.20974E-14 | 4.77304E-13 |
| CEREBRAL CORTEX     | 3.95272E-14 | 7.11489E-13 |
| MOTOR NEURON        | 1.24537E-13 | 1.92143E-12 |
| RENAL CORTEX        | 6.6998E-13  | 9.04473E-12 |
| DORSAL STRIATUM     | 3.43946E-12 | 4.12736E-11 |
| NEURONAL EPITHELIUM | 3.79083E-09 | 4.0941E-08  |

## Jensen TISSUES 1439 genes

|                 |  |  |
|-----------------|--|--|
| Hypothalamus    |  |  |
| Brain           |  |  |
| Cerebral_cortex |  |  |
| Uterus          |  |  |
| Esophagus       |  |  |
| Adrenal_gland   |  |  |
| Frontal_lobe    |  |  |
| Urinary_bladder |  |  |
| Heart           |  |  |
| Cerebellum      |  |  |



## 1,000 human-biased cranial neural crest cells (CNCCs) enhancers

## Jensen DISEASES 1439 genes

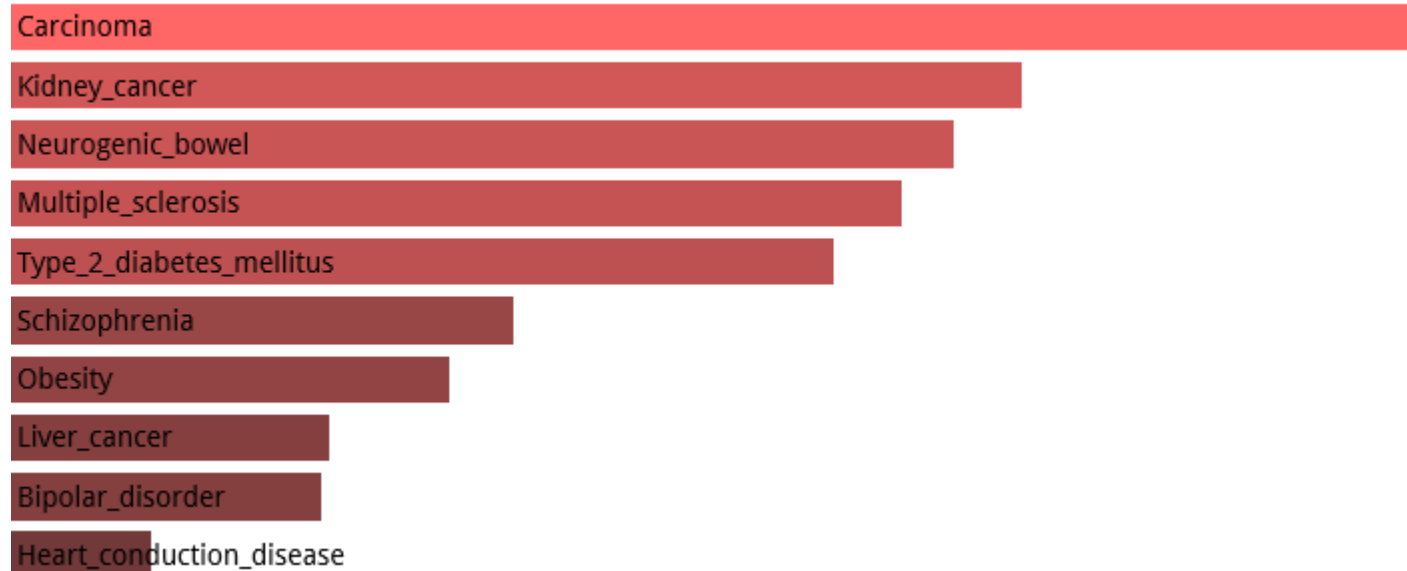

## Disease Perturbations from GEO up

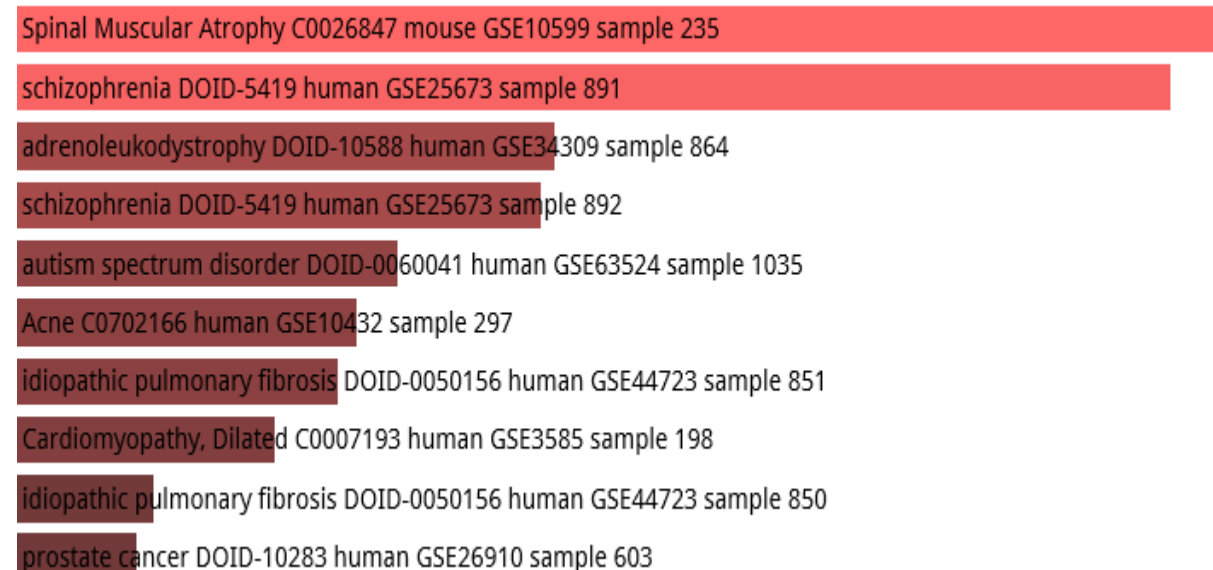

## Disease Perturbations from GEO down

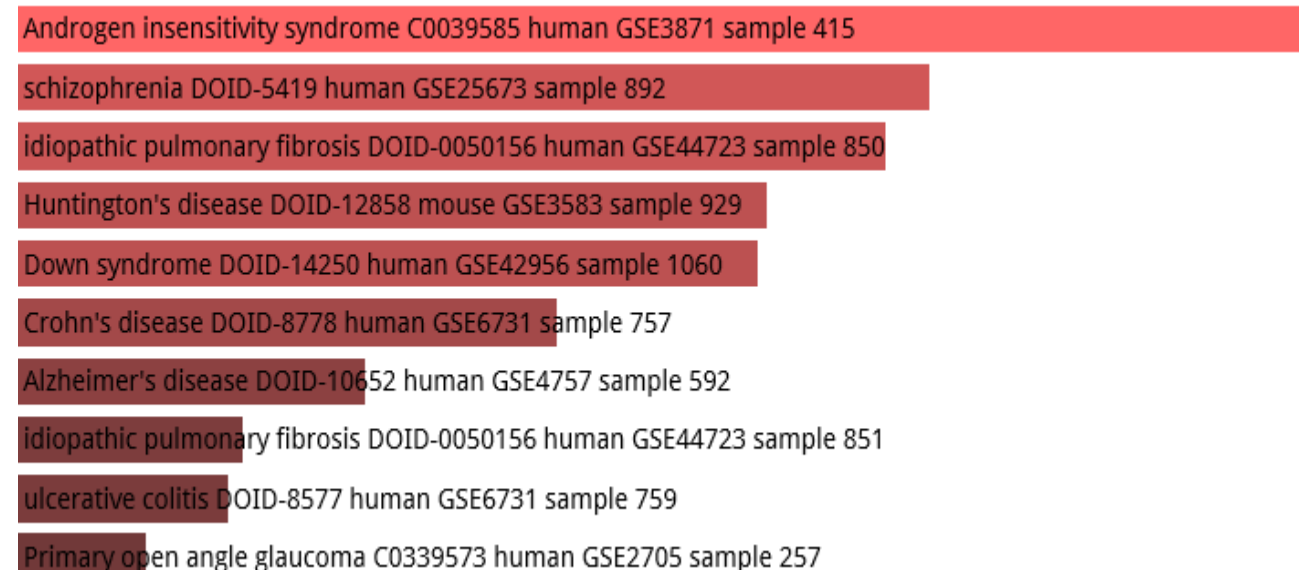

**1,000 chimp-biased cranial neural  
crest cells (CNCCs) enhancers**

# 1,000 chimp-biased cranial neural crest cells (CNCCs) enhancers

## ARCHS4 Tissues 1445 genes

|                               |             |             |
|-------------------------------|-------------|-------------|
| SPINAL CORD                   | 1.84547E-12 | 9.96554E-11 |
| SPINAL CORD (BULK)            | 1.84547E-12 | 9.96554E-11 |
| PREFRONTAL CORTEX             | 5.4055E-12  | 1.94598E-10 |
| RENAL CORTEX                  | 7.24092E-11 | 1.95505E-09 |
| SMALL INTESTINE (BULK TISSUE) | 2.19188E-09 | 4.73446E-08 |
| CEREBELLUM                    | 3.4921E-09  | 5.38781E-08 |
| CINGULATE GYRUS               | 3.4921E-09  | 5.38781E-08 |
| NEURONAL EPITHELIUM           | 2.1315E-08  | 2.87753E-07 |
| ADIPOSE (BULK TISSUE)         | 1.80906E-07 | 1.95378E-06 |
| LUNG (BULK TISSUE)            | 1.80906E-07 | 1.95378E-06 |

## Jensen TISSUES 1445 genes

|                 |
|-----------------|
| Hypothalamus    |
| Brain           |
| Cerebral_cortex |
| Uterus          |
| Heart           |
| Prostate_gland  |
| Ovary           |
| Placenta        |
| Esophagus       |
| Spleen          |

# 1,000 chimp-biased cranial neural crest cells (CNCCs) enhancers

# Jensen DISEASES 1445 genes

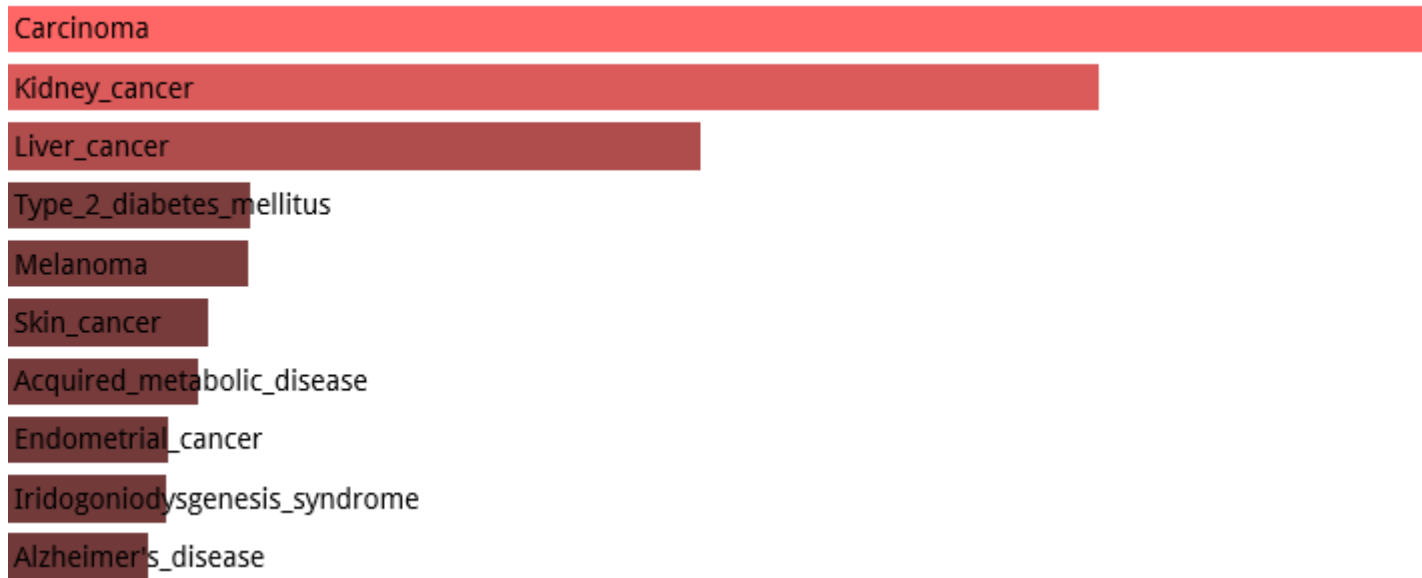

## Disease Perturbations from GEO up

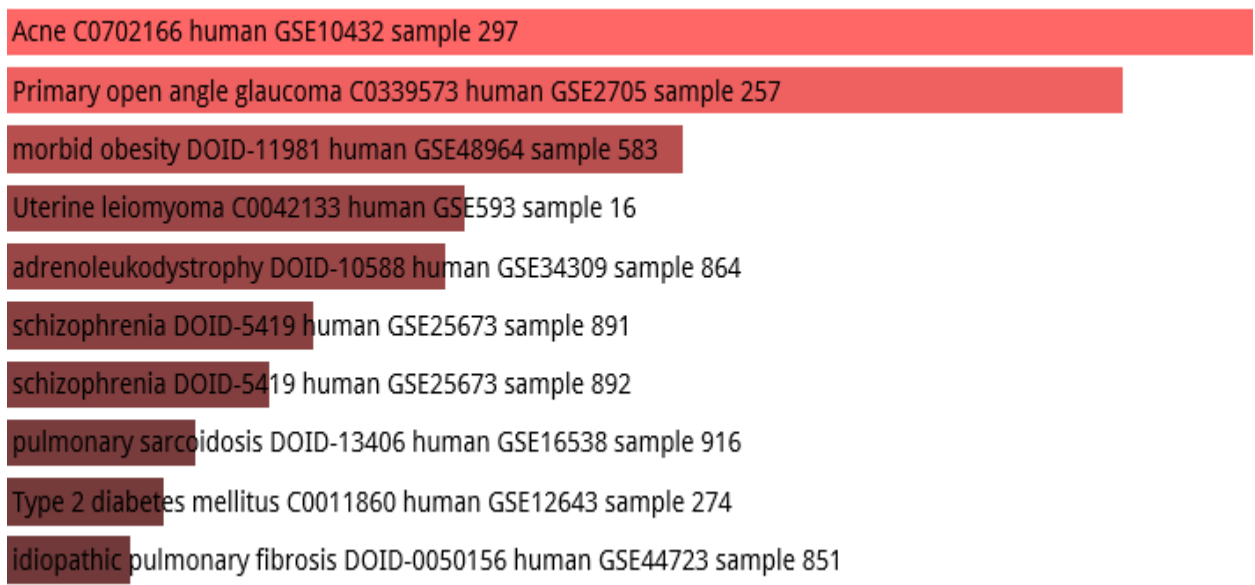

## Disease Perturbations from GEO down

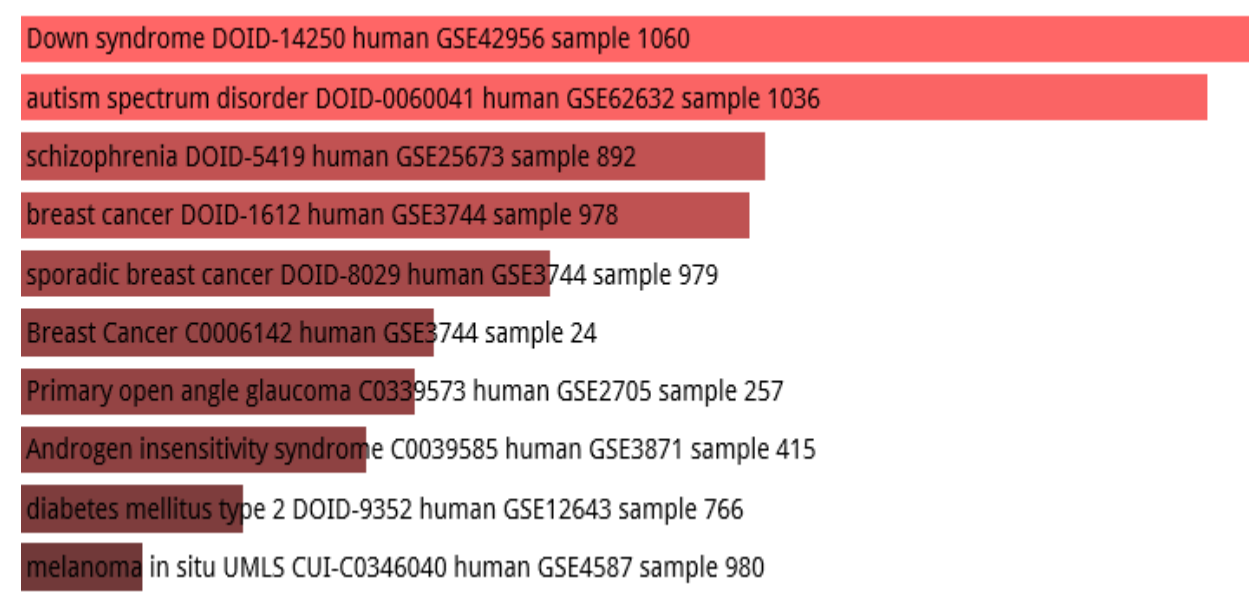

**1,619 human-specific functional  
hESC enhancers**

# 1,619 human-specific functional hESC enhancers

## ARCHS4 Tissues 1214 genes

|                     |             |             |
|---------------------|-------------|-------------|
| PREFRONTAL CORTEX   | 5.14081E-14 | 5.55208E-12 |
| CEREBELLUM          | 5.87258E-09 | 3.17119E-07 |
| NEURONAL EPITHELIUM | 9.56422E-09 | 3.44312E-07 |
| FETAL BRAIN CORTEX  | 1.56576E-07 | 4.22754E-06 |
| CINGULATE GYRUS     | 8.90068E-07 | 1.92255E-05 |
| CEREBRAL CORTEX     | 4.56907E-06 | 8.22432E-05 |
| MOTOR NEURON        | 9.96038E-06 | 0.0001536   |
| SPINAL CORD         | 2.11583E-05 | 0.0002539   |
| SPINAL CORD (BULK)  | 2.11583E-05 | 0.0002539   |
| BRAIN (BULK)        | 8.82976E-05 | 0.0009536   |

## Jensen TISSUES 1214 genes

|                 |  |  |
|-----------------|--|--|
| Hypothalamus    |  |  |
| Brain           |  |  |
| Heart           |  |  |
| Occipital_lobe  |  |  |
| Frontal_lobe    |  |  |
| Saliva          |  |  |
| Parietal_lobe   |  |  |
| Cerebral_cortex |  |  |
| JEG-3_cell      |  |  |
| Temporal_lobe   |  |  |

## 1,619 human-specific functional hESC enhancers

## Jensen DISEASES 1214 genes

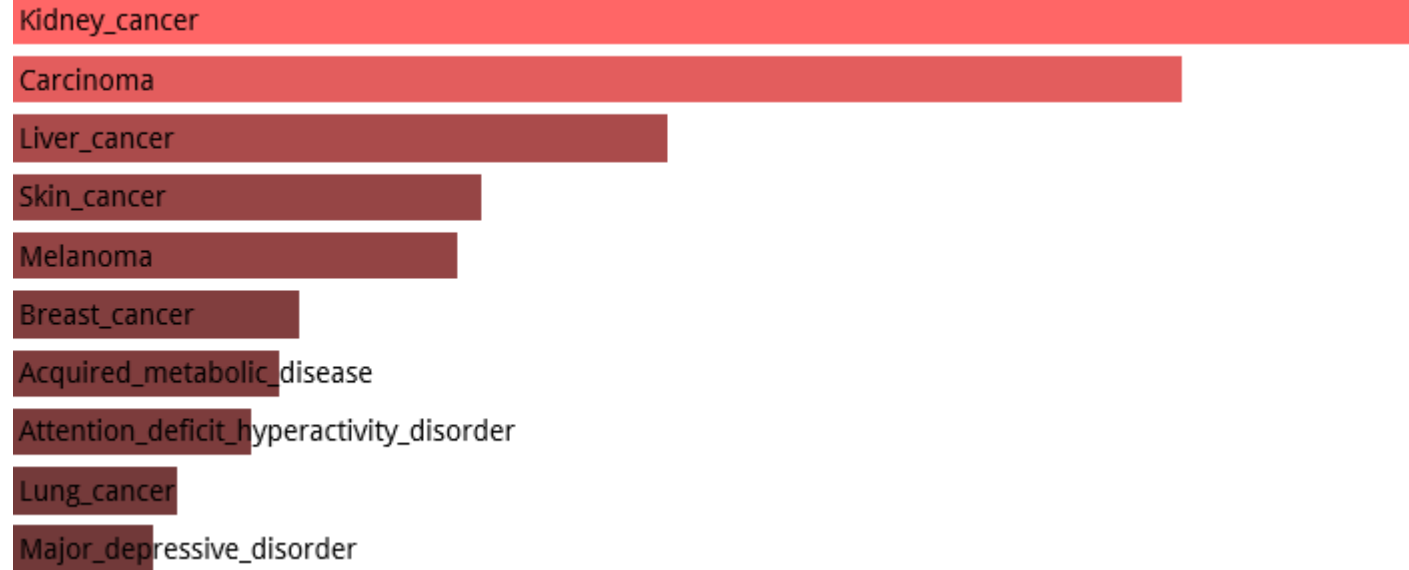

## Disease Perturbations from GEO up 1214 genes

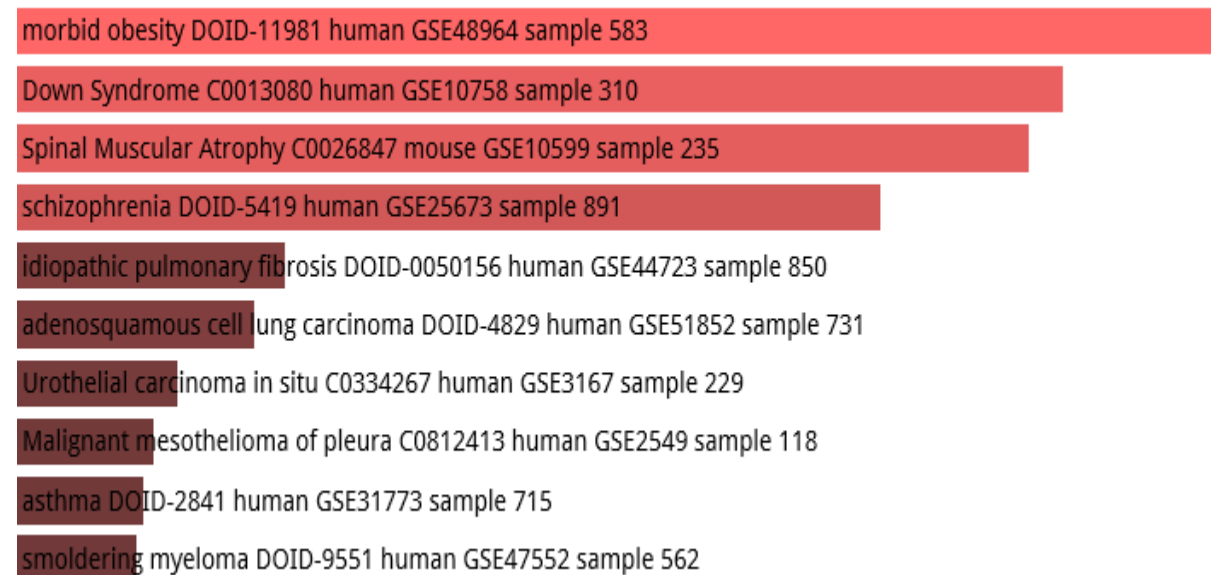

## Disease Perturbations from GEO down 1214 genes

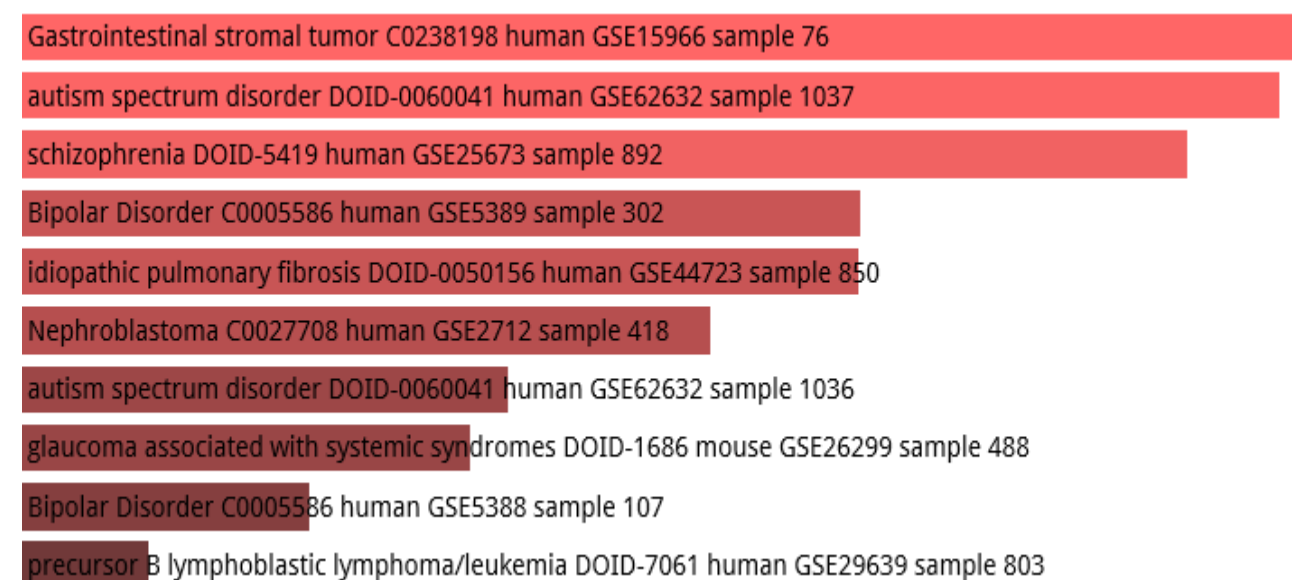

# 1,619 human-specific functional hESC enhancers

Allen Brain Atlas up 1214 genes

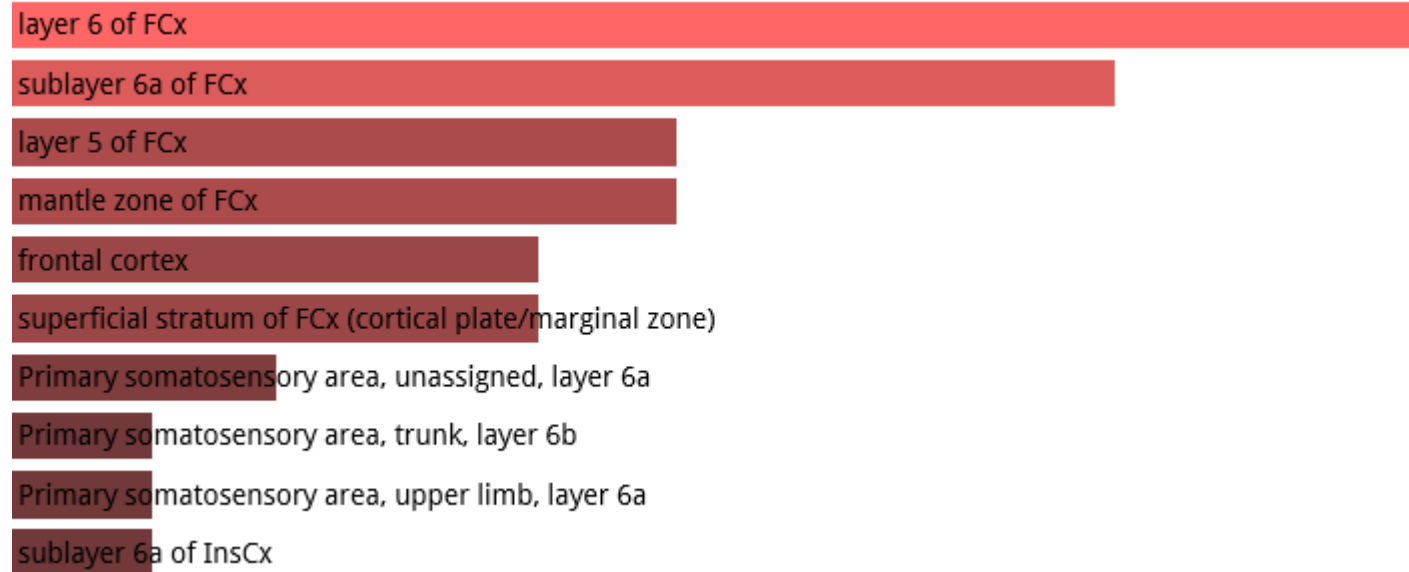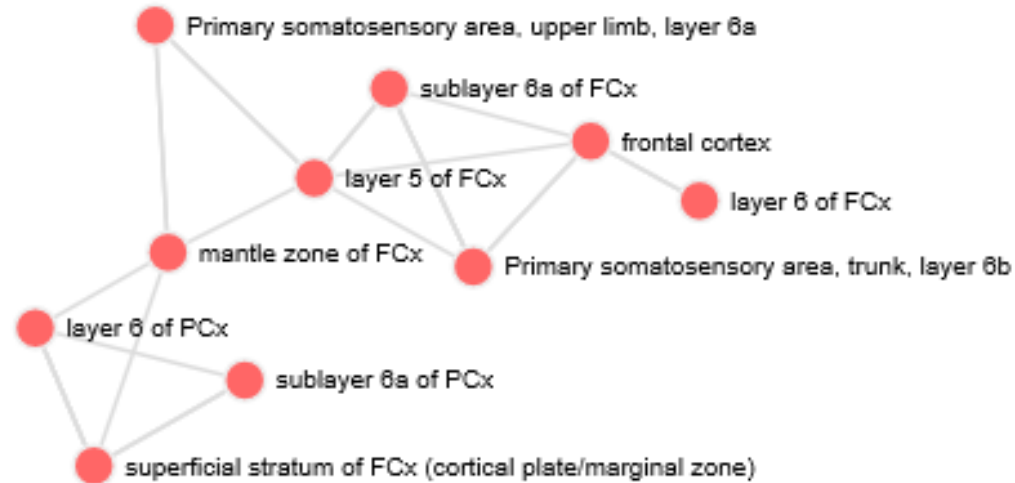



# 1,619 human-specific functional hESC enhancers

## ENCODE and ChEA Consensus TFs from ChIP-X 1214 genes

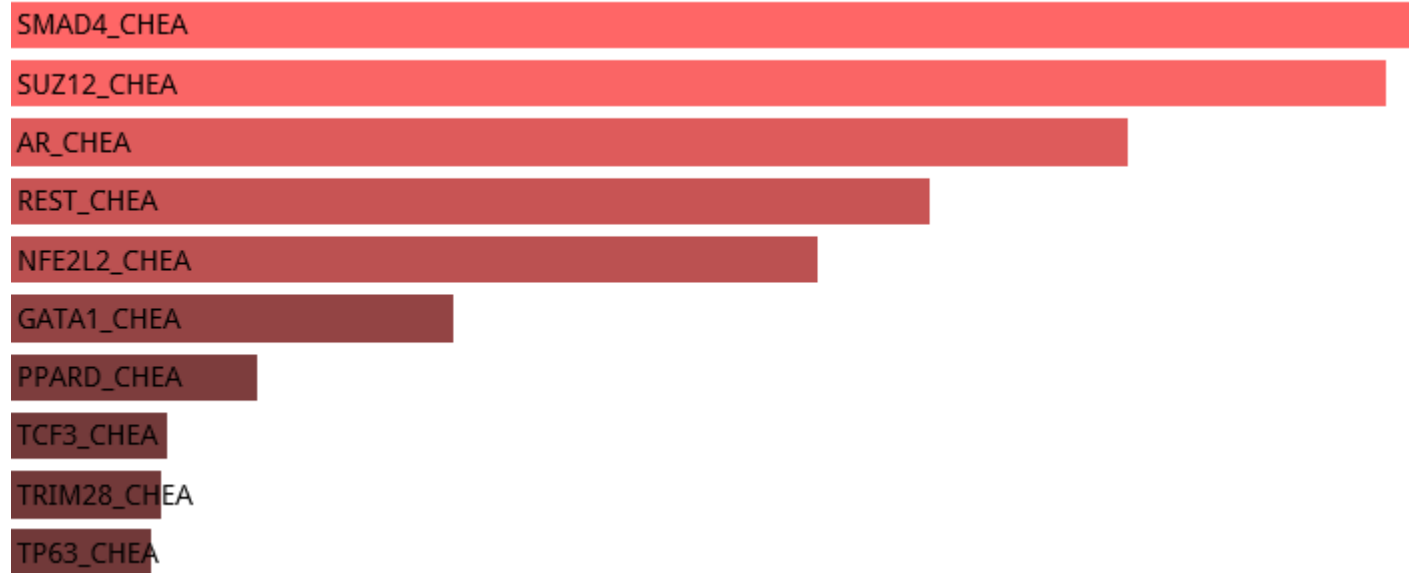

## ESCAPE 1214 genes

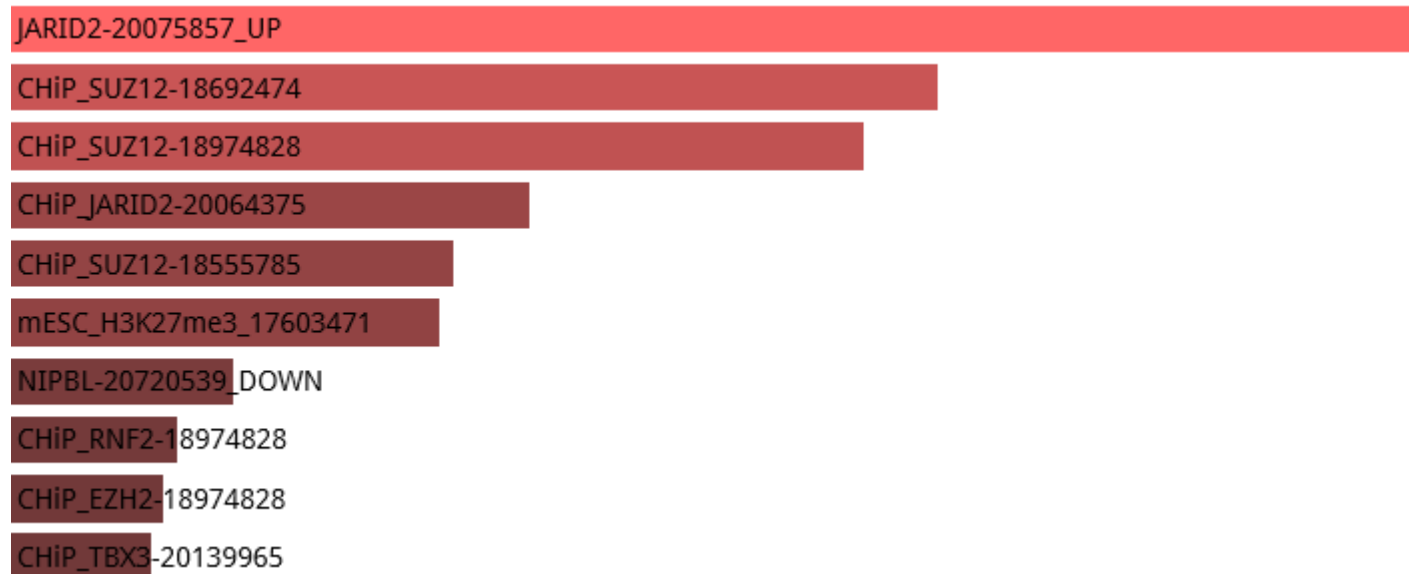

## 1,619 human-specific functional hESC enhancers

### GTEX Tissue Sample Gene Expression Profiles up 1214 genes

GTEX-QDT8-0011-R10A-SM-32PKG\_brain\_female\_30-39\_years

GTEX-QMR6-0011-R10A-SM-32PKO\_brain\_male\_50-59\_years

GTEX-QDT8-0011-R2A-SM-32PKQ\_brain\_female\_30-39\_years

GTEX-VJYA-1726-SM-3NMDQ\_nerve\_male\_60-69\_years

GTEX-POMQ-2026-SM-2S1OD\_nerve\_female\_20-29\_years

GTEX-QMR6-0011-R8A-SM-32PKJ\_brain\_male\_50-59\_years

GTEX-PVOW-0011-R3A-SM-32PKX\_brain\_male\_40-49\_years

GTEX-X585-0008-SM-46MU4\_skin\_male\_50-59\_years

GTEX-S7SE-0011-R10A-SM-2XCDF\_brain\_male\_50-59\_years

GTEX-XBEC-0008-SM-4AT3X\_skin\_male\_50-59\_years

### GTEX Tissue Sample Gene Expression Profiles down 1214 genes

GTEX-SN8G-0001-SM-3NM8L\_blood\_female\_50-59\_years

GTEX-XXEK-0004-SM-4BRWO\_blood\_male\_50-59\_years

GTEX-TMZS-0001-SM-3P61Q\_blood\_male\_60-69\_years

GTEX-XUYS-0002-SM-47JXL\_blood\_male\_50-59\_years

GTEX-WFON-0001-SM-3P61W\_blood\_male\_40-49\_years

GTEX-XYKS-0002-SM-4BRWN\_blood\_female\_60-69\_years

GTEX-XUJ4-0004-SM-4BOQE\_blood\_female\_60-69\_years

GTEX-WHPG-0004-SM-3NMDO\_blood\_male\_50-59\_years

GTEX-T6MO-0003-SM-3NMAG\_blood\_female\_40-49\_years

GTEX-WFJO-0002-SM-3P61X\_blood\_male\_30-39\_years

**524 human-specific DHS**

## 524 human-specific DHS

### ARCHS4 Tissues 747 genes

|                     |             |             |
|---------------------|-------------|-------------|
| PREFRONTAL CORTEX   | 1.84669E-23 | 1.99442E-21 |
| CEREBELLUM          | 2.96622E-17 | 1.60176E-15 |
| MIDBRAIN            | 6.7695E-17  | 2.43702E-15 |
| SPINAL CORD         | 3.4404E-16  | 7.43127E-15 |
| SPINAL CORD (BULK)  | 3.4404E-16  | 7.43127E-15 |
| CEREBRAL CORTEX     | 2.94376E-12 | 3.97408E-11 |
| CINGULATE GYRUS     | 2.94376E-12 | 3.97408E-11 |
| NEURONAL EPITHELIUM | 2.94376E-12 | 3.97408E-11 |
| MOTOR NEURON        | 1.18181E-11 | 1.41817E-10 |
| RENAL CORTEX        | 1.71559E-10 | 1.85284E-09 |

### Jensen TISSUES 747 genes

|                 |
|-----------------|
| Hypothalamus    |
| Brain           |
| Cerebral_cortex |
| Neural_crest    |
| Testis          |
| Gall_bladder    |
| Parietal_lobe   |
| Frontal_lobe    |
| Occipital_lobe  |
| Urinary_bladder |

## 524 human-specific DHS

## Jensen DISEASES 747 genes

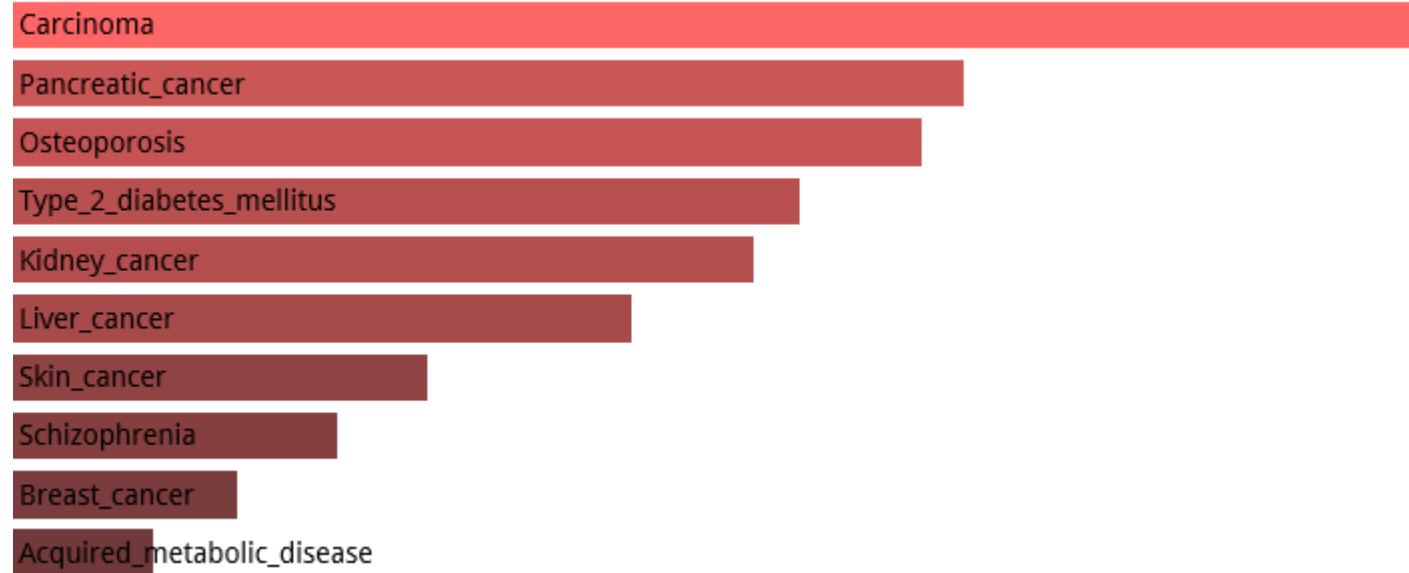

## Disease Perturbations from GEO up 747 genes

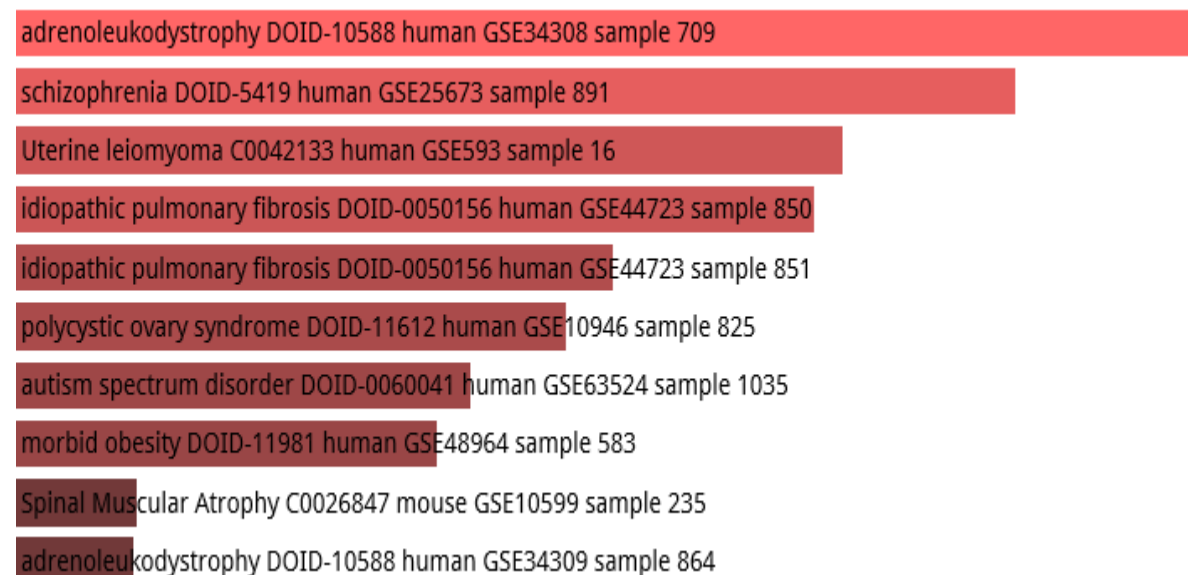

## Disease Perturbations from GEO down 747 genes

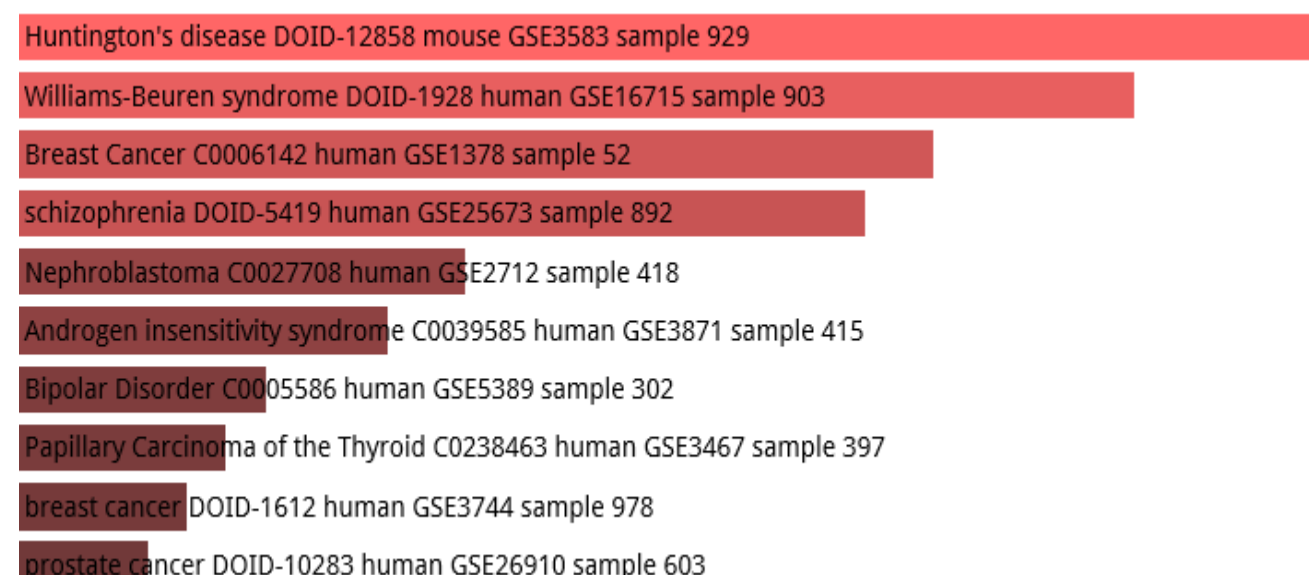

# 1,279 human-specific STR contractions

## ARCHS4 Tissues 973 genes

|                             |             |          |
|-----------------------------|-------------|----------|
| SUPERIOR FRONTAL GYRUS      | 1.4292E-06  | 0.000154 |
| SPINAL CORD                 | 2.86362E-05 | 0.001031 |
| SPINAL CORD (BULK)          | 2.86362E-05 | 0.001031 |
| BRAIN (BULK)                | 9.20916E-05 | 0.002486 |
| SUBCUTANEOUS ADIPOSE TISSUE | 0.000192908 | 0.004167 |
| RENAL CORTEX                | 0.000275908 | 0.004257 |
| ADIPOSE (BULK TISSUE)       | 0.000275908 | 0.004257 |
| BREAST (BULK TISSUE)        | 0.000391501 | 0.005285 |
| MOTOR NEURON                | 0.010836889 | 0.130043 |
| LUNG (BULK TISSUE)          | 0.013964132 | 0.150813 |

## Jensen TISSUES 973 genes

|                     |
|---------------------|
| Brain               |
| Eye                 |
| Retinoblastoma_cell |
| ac2                 |
| Occipital_lobe      |
| Germinal_epithelium |
| Barrett's_esophagus |
| Somite              |
| Helam               |
| Sputum              |

## Jensen DISEASES 973 genes

|                                        |
|----------------------------------------|
| Miller-Dieker_lissencephaly_syndrome   |
| Wolf-Hirschhorn_syndrome               |
| Chondrodysplasia_punctata              |
| Chromosome_1p36_deletion_syndrome      |
| Hemolytic_anemia                       |
| Mixed_connective_tissue_disease        |
| Large_intestine_cancer                 |
| relapsing-remitting_multiple_sclerosis |
| Pancreatic_cancer                      |
| Beckwith-Wiedemann_syndrome            |

## Disease Perturbations from GEO up 973 genes

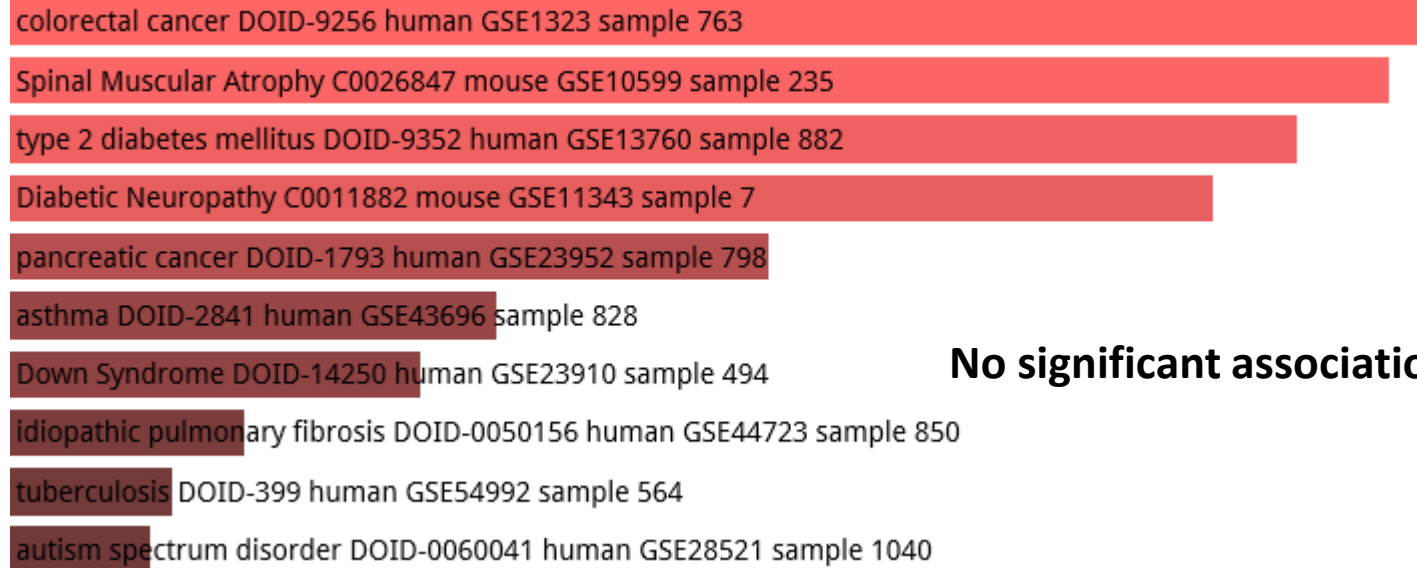

**No significant associations**

## Disease Perturbations from GEO down 973 genes

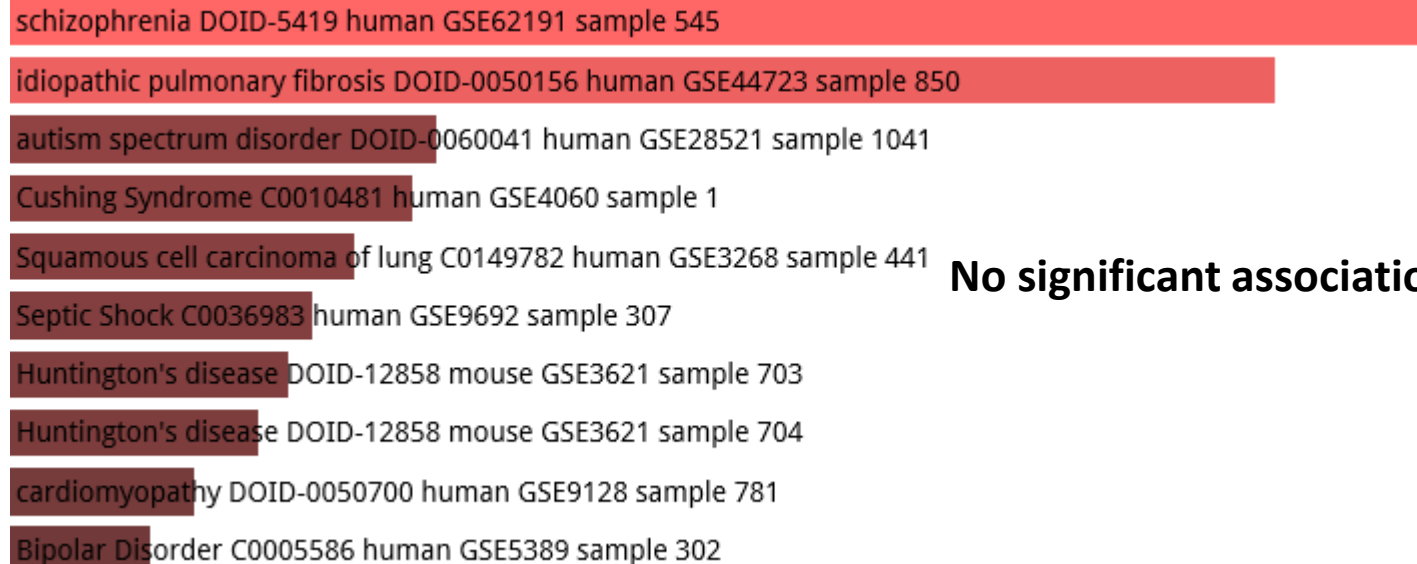

**No significant associations**

**2,118 fixed human-specific regulatory regions  
(non-hESC DHS)**

ARCHS4 Tissues 552 genes

|                        |             |         |
|------------------------|-------------|---------|
| PREFRONTAL CORTEX      | 4.6456E-05  | 0.00167 |
| SPINAL CORD            | 4.6456E-05  | 0.00167 |
| SPINAL CORD (BULK)     | 2.79873E-05 | 0.00167 |
| MOTOR NEURON           | 0.000311    | 0.00840 |
| CINGULATE GYRUS        | 0.003676    | 0.06616 |
| BRAIN (BULK)           | 0.003676    | 0.06616 |
| NEURONAL EPITHELIUM    | 0.005300    | 0.08178 |
| CEREBRAL CORTEX        | 0.007545    | 0.09054 |
| SUPERIOR FRONTAL GYRUS | 0.007545    | 0.09054 |
| DORSAL STRIATUM        | 0.027142    | 0.29314 |

**410 H3K4me3 sites with human-specific  
enrichment in prefrontal cortex neurons**

ARCHS4 Tissues 578 genes

|                        |          |         |
|------------------------|----------|---------|
| SUPERIOR FRONTAL GYRUS | 0.000933 | 0.10074 |
| NEURONAL EPITHELIUM    | 0.008682 | 0.31255 |
| FETAL BRAIN            | 0.006177 | 0.31255 |
| CEREBRAL CORTEX        | 0.016511 | 0.40212 |
| MOTOR NEURON           | 0.022340 | 0.40212 |
| BRAIN (BULK)           | 0.022340 | 0.40212 |
| CEREBELLUM             | 0.039369 | 0.47242 |
| SPINAL CORD            | 0.039369 | 0.47242 |
| SPINAL CORD (BULK)     | 0.039369 | 0.47242 |
| FIBROBLAST             |          |         |

**No significant associations**



**42,847 human genes not linked by the GREAT algorithm with HSRS were randomly split into 21 control gene sets of various sizes ranging from 2,847 to 6,847 genes and subjected to the GSEA**

**GSEA OF TWENTY-ONE CONTROL GENE SETS NOT  
ASSOCIATED WITH HUMAN-SPECIFIC GENOMIC  
REGULATORY LOCI**

## Random Set 1

ASTROCYTE

KIDNEY (BULK TISSUE)

GASTRIC TISSUE (BULK)

SPINAL CORD (BULK)

SMALL INTESTINE (BULK TISSUE)

OVARY (BULK TISSUE)

SPINAL CORD

PLACENTA (BULK)

SKIN (BULK TISSUE)

HUMAN EMBRYO

ARCHS4 Tissues random 6000 genes

**NO SIGNIFICANT ENRICHMENT**

Jensen TISSUES random 6847 genes

**NO DATA AVAILABLE**

## Random Set 1

## Jensen DISEASES random 6000 genes

Reticular\_dysgenesis  
Amyotrophic\_lateral\_sclerosis\_type\_8  
Succinic\_semi-aldehyde\_dehydrogenase\_deficiency  
Rhizomelic\_chondrodysplasia\_punctata  
Biotinidase\_deficiency  
Intrahepatic\_cholestasis  
Conversion\_disorder  
Retinal\_ischemia  
Hypersensitivity\_reaction\_type\_II\_disease  
Pseudohermaphroditism

**NO SIGNIFICANT ENRICHMENT**

## Disease Perturbations from GEO up random 6000 genes

pancreatic ductal adenocarcinoma DOID-3498 mouse GSE53659 sample 699  
juvenile dermatomyositis UMLS CUI-C0263666 human GSE11971 sample 772  
amyotrophic lateral sclerosis DOID-332 mouse GSE10953 sample 679  
juvenile dermatomyositis UMLS CUI-C0263666 human GSE11971 sample 771  
nemaline myopathy DOID-3191 mouse GSE3384 sample 971  
nemaline myopathy DOID-3191 mouse GSE3384 sample 971  
Nemaline Myopathy C0206157 mouse GSE3384 sample 317  
lupus erythematosus DOID-8857 human GSE30153 sample 739  
Duchenne muscular dystrophy (DMD) C0013264 mouse GSE1008 sample 298  
idiopathic pulmonary fibrosis DOID-0050156 human GSE24206 sample 872

**NO SIGNIFICANT ENRICHMENT**

## Disease Perturbations from GEO down random 6000 genes

pulmonary tuberculosis DOID-2957 mouse GSE48027 sample 831  
polycystic ovary syndrome DOID-11612 human GSE48301 sample 558  
Nicotine addiction C0028043 human GSE11208 sample 325  
autism spectrum disorder DOID-0060041 human GSE62632 sample 1037  
mental retardation DOID-1059 human GSE375 sample 1047  
Diabetic Neuropathy C0011882 mouse GSE11343 sample 7  
Alcohol poisoning C0392620 rat GSE3311 sample 288  
asthma DOID-2841 human GSE43696 sample 830  
systemic lupus erythematosus DOID-9074 human GSE55447 sample 1075  
Thymic Carcinoma C0205969 mouse GSE2501 sample 344

**NO SIGNIFICANT ENRICHMENT**

## Random Set 1

## Allen Brain Atlas up random 6000 genes

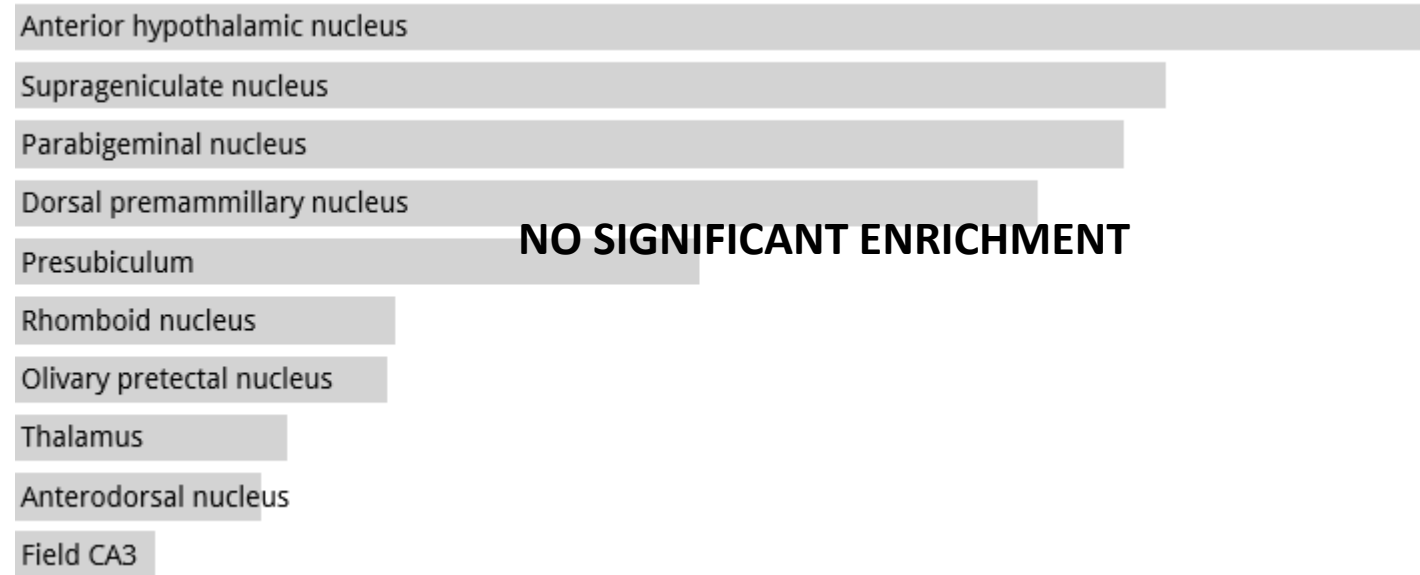

## Random Set 2

ARCHS4 Tissues random 6000 genes

GASTRIC TISSUE (BULK)

SKIN (BULK TISSUE)

OMENTUM

SMALL INTESTINE (BULK TISSUE)

CINGULATE GYRUS

COLON (BULK TISSUE)

NEURONAL EPITHELIUM

PREFRONTAL CORTEX

PANCREATIC ISLET

MYOBLAST

**NO SIGNIFICANT ENRICHMENT**

Jensen TISSUES random 6847 genes

**NO DATA AVAILABLE**

## Random Set 2

## Jensen DISEASES random 6000 genes

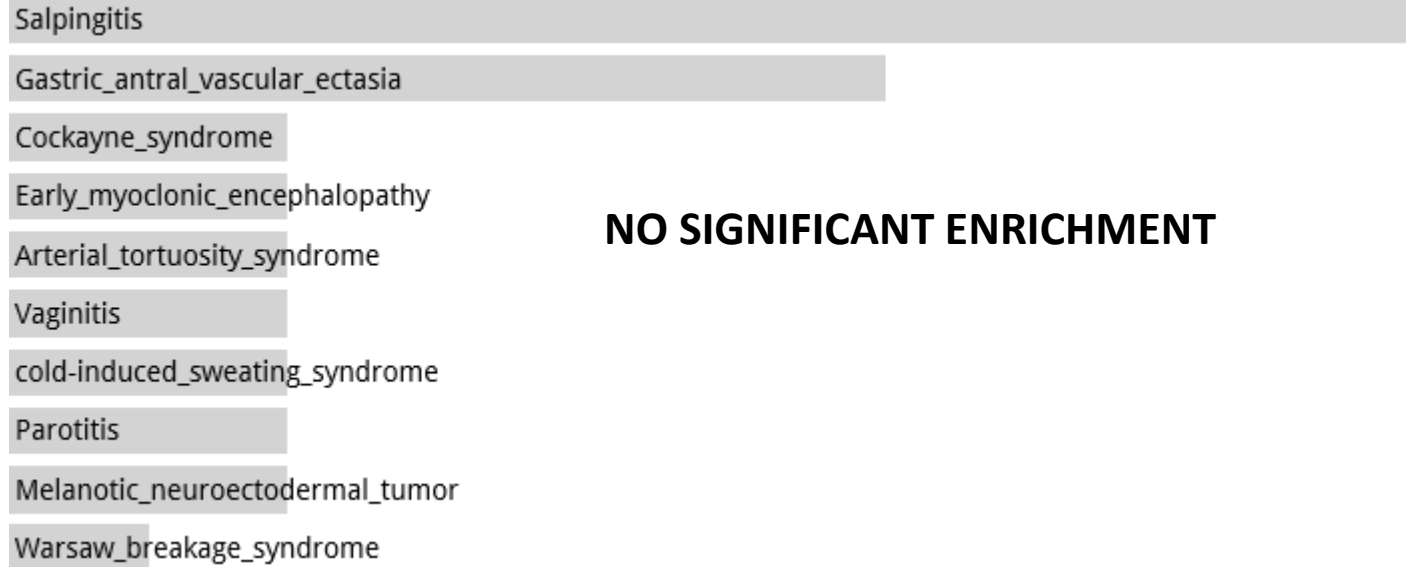

## Disease Perturbations from GEO up random 6000 genes

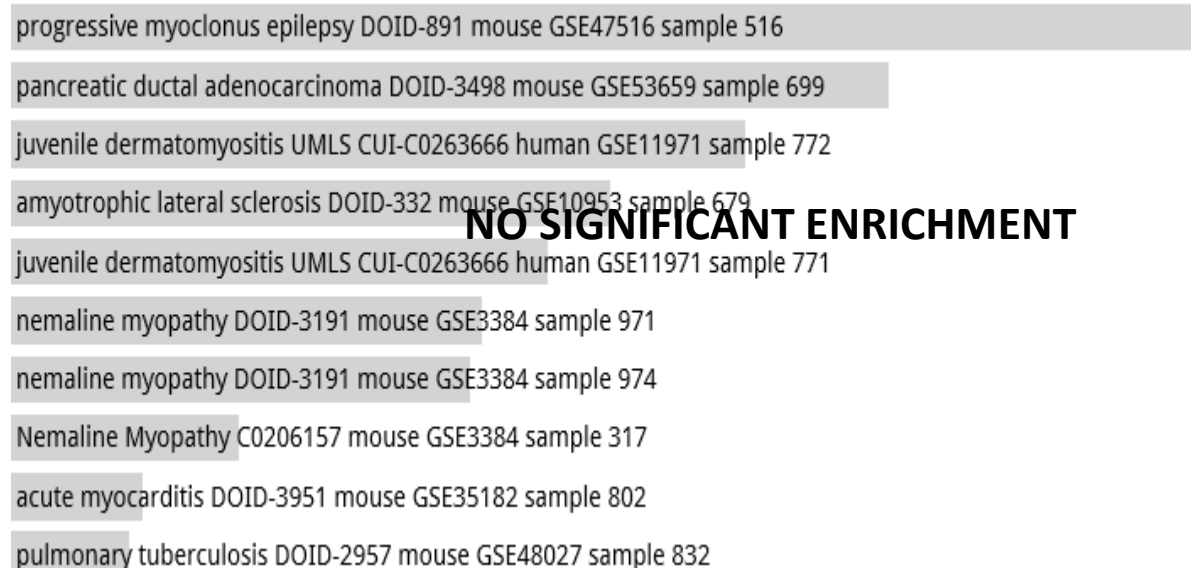

## Disease Perturbations from GEO down random 6000 genes

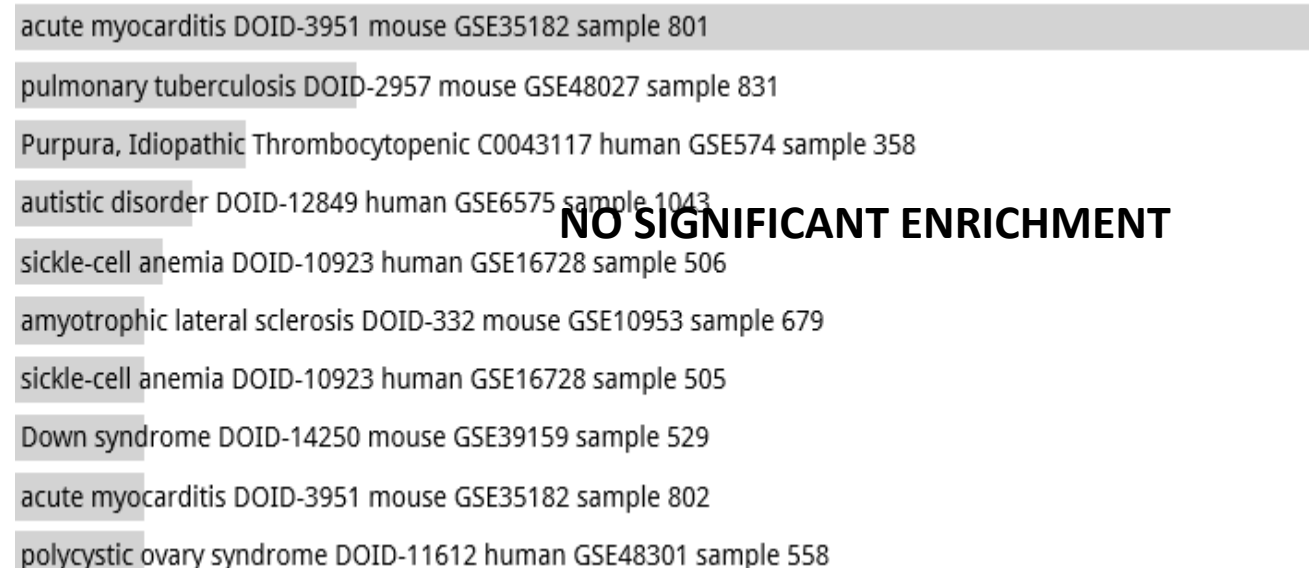

## Random Set 2

### Allen Brain Atlas up random 6000 genes

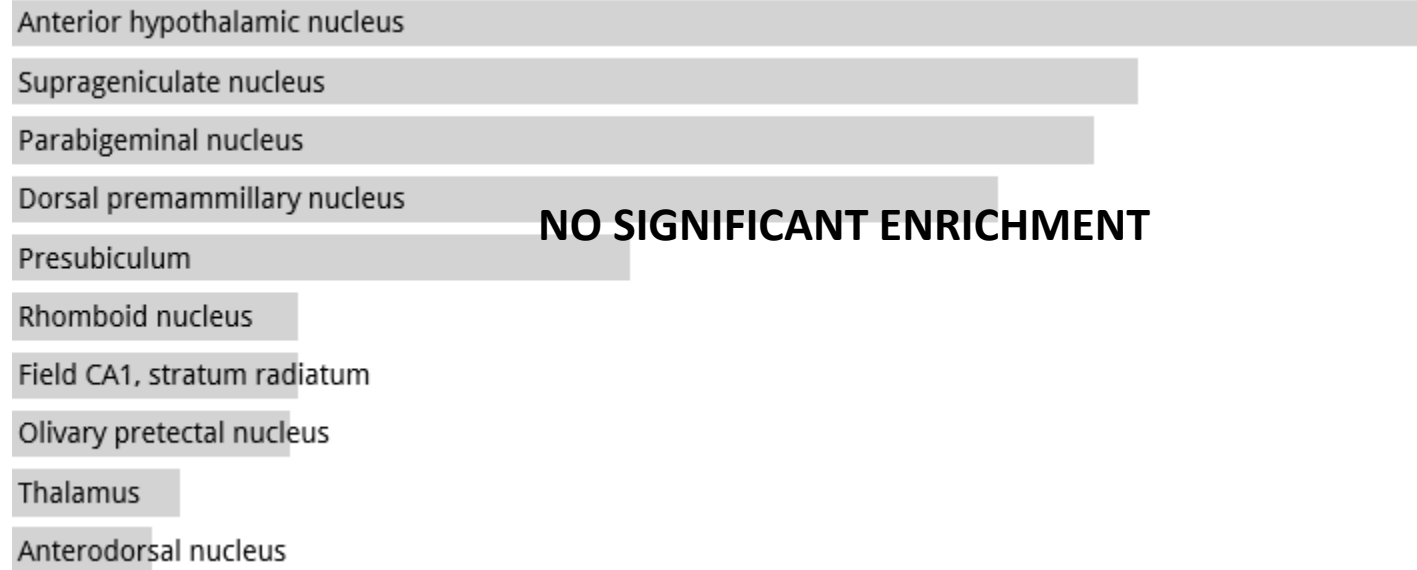



### Random Set 3

ARCHS4 Tissues random 6000 genes

COLONIC MUCOSA

VENTRICLE

PREFRONTAL CORTEX

BRAIN (BULK)

SUPERIOR FRONTAL GYRUS

NEURONAL EPITHELIUM

ADIPOSE (BULK TISSUE)

HUMAN ZYGOTE

RENAL CORTEX

MYOBLAST

**NO SIGNIFICANT ENRICHMENT**

Jensen TISSUES random 6847 genes

**NO DATA AVAILABLE**

### Random Set 3

### Jensen DISEASES random 6000 genes

Hereditary\_mucosal\_leukokeratosis

Echolalia

Dumping\_syndrome

X-linked\_endothelial\_corneal\_dystrophy

IMAGe\_syndrome

Clouston\_syndrome

Oculodentodigital\_dysplasia

Irritant\_dermatitis

Brain\_glioma

Pachyonychia\_congenita

**NO SIGNIFICANT ENRICHMENT**

### Disease Perturbations from GEO up random 6000 genes

Dental cavity, complex C0399396 human GSE1629 sample 175

Alzheimer's disease DOID-10652 human GSE36980 sample 519

actinic keratosis DOID-8866 human GSE2503 sample 628

Actinic keratosis C0022602 human GSE2503 sample 350

acute myeloid leukemia DOID-9119 human GSE9476 sample 782

ulcerative colitis DOID-8577 human GSE9452 sample 924

type 2 diabetes mellitus DOID-9352 human GSE23343 sample 895

acute myeloid leukemia DOID-9119 human GSE9476 sample 783

polycystic ovary syndrome DOID-11612 human GSE48301 sample 558

Epilepsy C0014544 human GSE7486 sample 417

**NO SIGNIFICANT ENRICHMENT**

### Disease Perturbations from GEO down random 6000 genes

multiple myeloma DOID-9538 human GSE6691 sample 787

acute myocarditis DOID-3951 mouse GSE35182 sample 801

Smoldering multiple myeloma C1531608 human GSE5900 sample 404

autistic disorder DOID-12849 human GSE6575 sample 1043

autistic disorder DOID-12849 human GSE6575 sample 1042

pulmonary tuberculosis DOID-2957 mouse GSE48027 sample 831

mental retardation DOID-1059 human GSE6575 sample 1044

Down syndrome DOID-14250 mouse GSE39159 sample 529

Septic Shock C0036983 human GSE9692 sample 307

West Nile fever DOID-2366 human GSE30719 sample 874

**NO SIGNIFICANT ENRICHMENT**

### Random Set 3

### Allen Brain Atlas up random 6000 genes

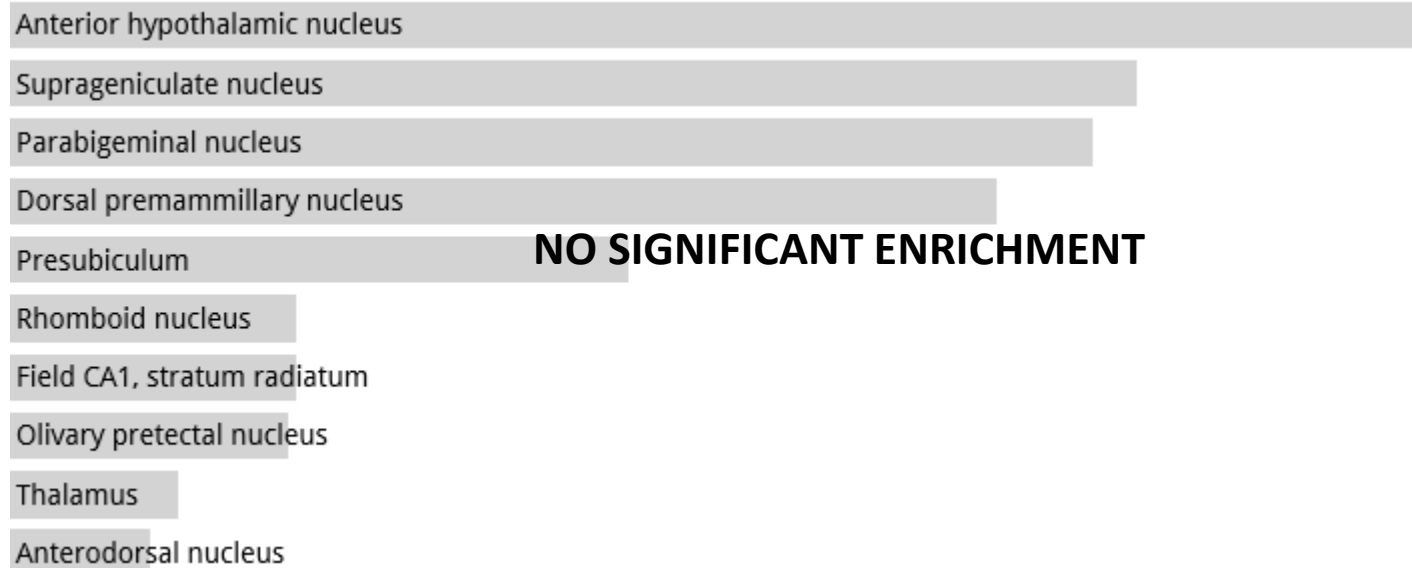

## Random Set 4

GASTRIC TISSUE (BULK)

PREFRONTAL CORTEX

COLON (BULK TISSUE)

LUNG (BULK TISSUE)

OMENTUM

NEURONAL EPITHELIUM

LIVER (BULK TISSUE)

ILEUM (BULK)

FETAL BRAIN CORTEX

SUPERIOR FRONTAL GYRUS

ARCHS4 Tissues random 6000 genes

**NO SIGNIFICANT ENRICHMENT**

Jensen TISSUES random 6847 genes

**NO DATA AVAILABLE**

## Random Set 4

## Jensen DISEASES random 6000 genes

Urinary\_schistosomiasis

Hermaphroditism

Zellweger\_syndrome

Latex\_allergy

Scimitar\_syndrome

Conversion\_disorder

Gastric\_lymphoma

Juvenile\_polyposis\_syndrome

Invasive\_lobular\_carcinoma

Acute\_promyelocytic\_leukemia

**NO SIGNIFICANT ENRICHMENT**

## Disease Perturbations from GEO up random 6000 genes

pancreatic ductal adenocarcinoma DOID-3498 mouse GSE53659 sample 699

juvenile dermatomyositis UMLS CUI-C0263666 human GSE11971 sample 772

amyotrophic lateral sclerosis DOID-332 mouse GSE10953 sample 679

juvenile dermatomyositis UMLS CUI-C0263666 human GSE11971 sample 771

Cardiac Hypertrophy C1383860 rat GSE1055 sample 354

nemaline myopathy DOID-3191 mouse GSE3384 sample 974

nemaline myopathy DOID-3191 mouse GSE3384 sample 971

Nemaline Myopathy C0206157 mouse GSE3384 sample 317

Down syndrome DOID-14250 human GSE20910 sample 1063

idiopathic pulmonary fibrosis DOID-0050156 human GSE24206 sample 872

**NO SIGNIFICANT ENRICHMENT**

## Disease Perturbations from GEO down random 6000 genes

pulmonary tuberculosis DOID-2957 mouse GSE48027 sample 831

acute myocarditis DOID-3951 mouse GSE35182 sample 801

amyotrophic lateral sclerosis DOID-332 mouse GSE10953 sample 679

nemaline myopathy DOID-3191 mouse GSE3384 sample 971

Purpura, Idiopathic Thrombocytopenic C0043117 human GSE574 sample 358

juvenile dermatomyositis UMLS CUI-C0263666 human GSE11971 sample 772

West Nile fever DOID-2366 human GSE30719 sample 874

Nemaline Myopathy C0206157 mouse GSE3384 sample 317

juvenile dermatomyositis UMLS CUI-C0263666 human GSE11971 sample 771

acute myocardial infarction DOID-9408 mouse GSE775 sample 1000

**NO SIGNIFICANT ENRICHMENT**

## Random Set 4

## Allen Brain Atlas up random 6000 genes

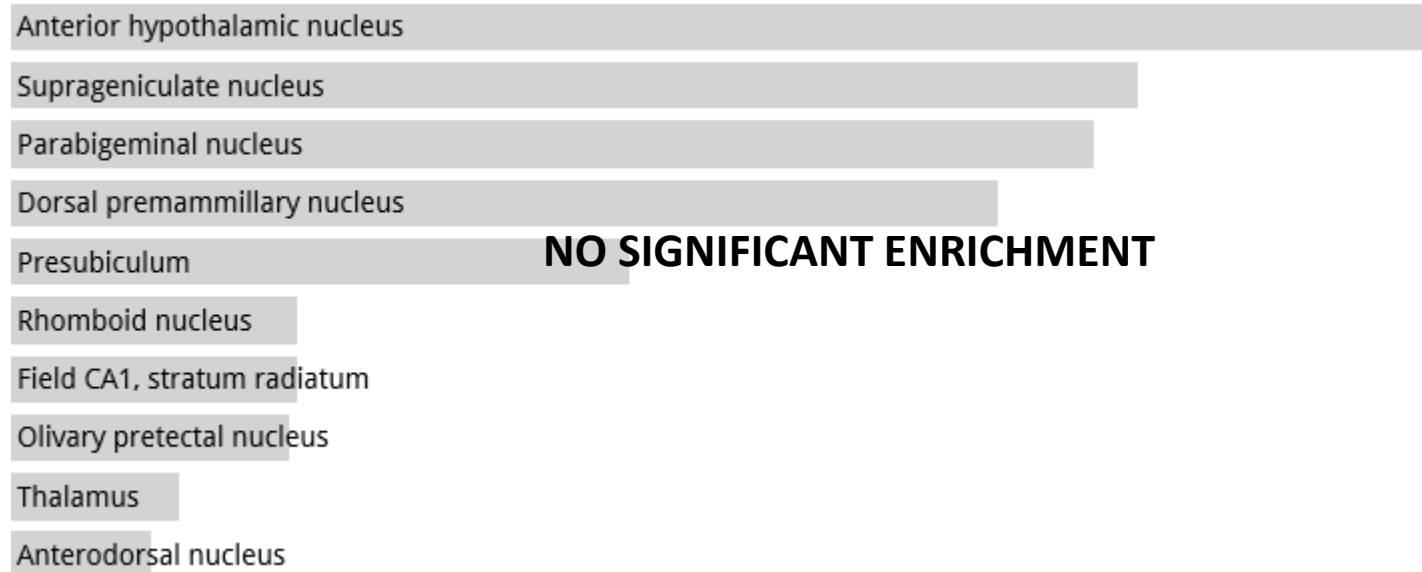

## Random Set 5

ARCHS4 Tissues random 6000 genes

SMALL INTESTINE (BULK TISSUE)

VASCULAR SMOOTH MUSCLE

SKIN (BULK TISSUE)

THYROID (BULK TISSUE)

STROMAL CELL

RESPIRATORY SMOOTH MUSCLE

RENAL CORTEX

SKELETAL MUSCLE (BULK TISSUE)

REGULATORY T CELLS

PANCREATIC ISLET

**NO SIGNIFICANT ENRICHMENT**

Jensen TISSUES random 6847 genes

**NO DATA AVAILABLE**

## Random Set 5

## Jensen DISEASES random 6000 genes

Enthesopathy

Gyrate\_atrophy

Vitelliform\_macular\_dystrophy

Opisthorchiasis

Amelogenesis\_imperfecta

3-methylglutaconic\_aciduria

Mastitis

Cone\_dystrophy

Hydrocephalus

Fundus\_dystrophy

**NO SIGNIFICANT ENRICHMENT**

## Disease Perturbations from GEO up random 6000 genes

nemaline myopathy DOID-3191 mouse GSE3384 sample 974

Nemaline Myopathy C0206157 mouse GSE3384 sample 317

Depression DOID-1595 mouse GSE26025 sample 463

autistic disorder DOID-12849 human GSE6575 sample 1043

Retinal damage C0235272 rat GSE1001 sample 312 **NO SIGNIFICANT ENRICHMENT**

Retinitis Pigmentosa C0035334 mouse GSE128 sample 33

Alzheimer's disease DOID-10652 human GSE36980 sample 523

Alcohol poisoning C0392620 rat GSE3311 sample 288

non-systemic juvenile idiopathic arthritis (sJIA) (subgroup-RF+ polyarthritis) DOID-848 human GSE21521 sample

colitis DOID-0060180 mouse GSE34874 sample 800

## Disease Perturbations from GEO down random 6000 genes

polycystic ovary syndrome DOID-11612 human GSE48301 sample 558

glaucoma associated with systemic syndromes DOID-1686 mouse GSE26299 sample 491

MS (Multiple Sclerosis) C0026769 mouse GSE842 sample 381

breast adenocarcinoma DOID-3458 human GSE61304 sample 1071

Muscular Dystrophy C0026850 mouse GSE21521 sample 1043 **NO SIGNIFICANT ENRICHMENT**

Wolfram syndrome UMLS CUI-C0043207 mouse GSE15293 sample 695

amyotrophic lateral sclerosis DOID-332 mouse GSE10953 sample 681

Huntington's disease DOID-12858 mouse GSE3248 sample 723

Duchenne muscular dystrophy (DMD) C0013264 mouse GSE466 sample 328

Emery-Dreifuss muscular dystrophy, autosomal recessive form DOID-11726 mouse GSE8000 sample 677



## Random Set 5

## Allen Brain Atlas up random 6000 genes

Presubiculum

Endopiriform nucleus, dorsal part

dorsal endopiriform nucleus

Copula pyramidis

bed nucleus of the external capsule

mantle zone of r7Co

Agranular insular area, posterior part, layer 6a

Entorhinal area, medial part, dorsal zone, layer 5

corticoid layer of TuStr

Infralimbic area, layer 6b

**NO SIGNIFICANT ENRICHMENT**

**Random Set 6**

ARCHS4 Tissues random 6000 genes

**NO DATA AVAILABLE**

Jensen TISSUES random 6000 genes

**NO DATA AVAILABLE**

**Random Set 6**

Jensen DISEASES random 6000 genes

**NO DATA AVAILABLE**

Disease Perturbations from GEO up random 6000 genes

**NO DATA AVAILABLE**

Disease Perturbations from GEO down random 6000 genes

Systemic lupus erythematosus (SLE) C0024141 human GSE12374 sample 123

**NO SIGNIFICANT ENRICHMENT**

**Random Set 6**

Allen Brain Atlas up random 6000 genes

**NO DATA AVAILABLE**

## Random Set 7

ARCHS4 Tissues random 6847 genes

LYMPHOCYTE

OMENTUM

GASTRIC TISSUE (BULK)

PREFRONTAL CORTEX

SPINAL CORD (BULK)

SPINAL CORD

LUNG (BULK TISSUE)

CARDIAC MUSCLE FIBER

BREAST (BULK TISSUE)

NEURONAL EPITHELIUM

**NO SIGNIFICANT ENRICHMENT**

Jensen TISSUES random 6847 genes

**NO DATA AVAILABLE**

## Random Set 7

## Jensen DISEASES random 6847 genes

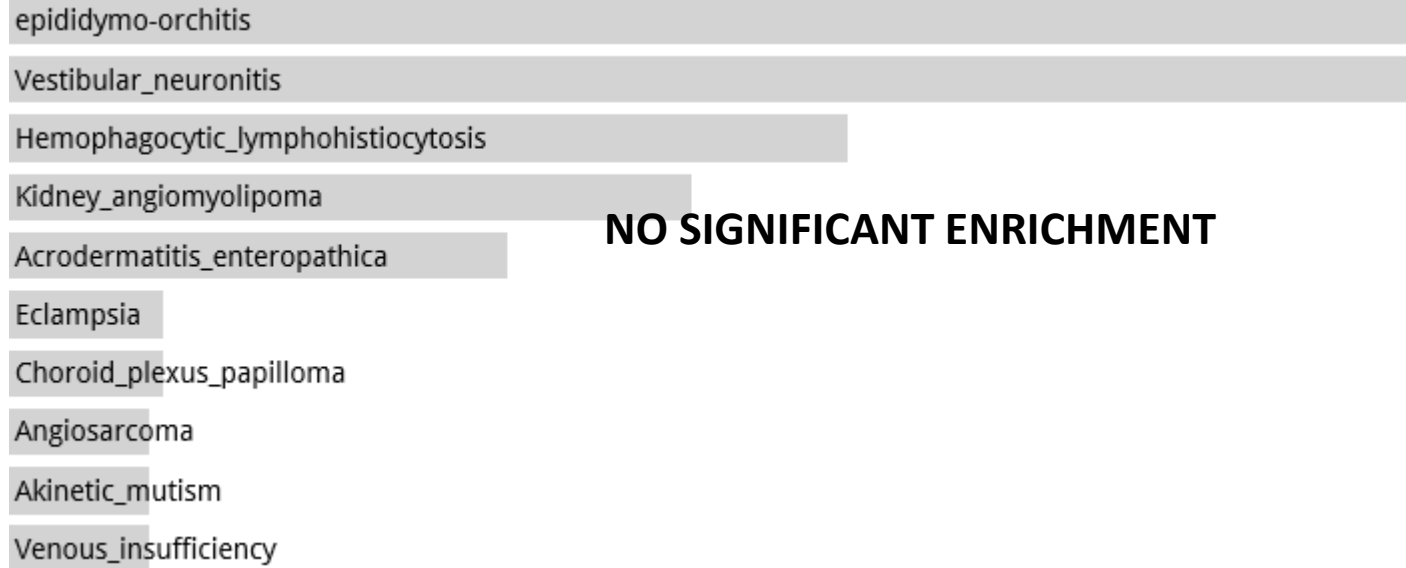

## Disease Perturbations from GEO up random 6000 genes

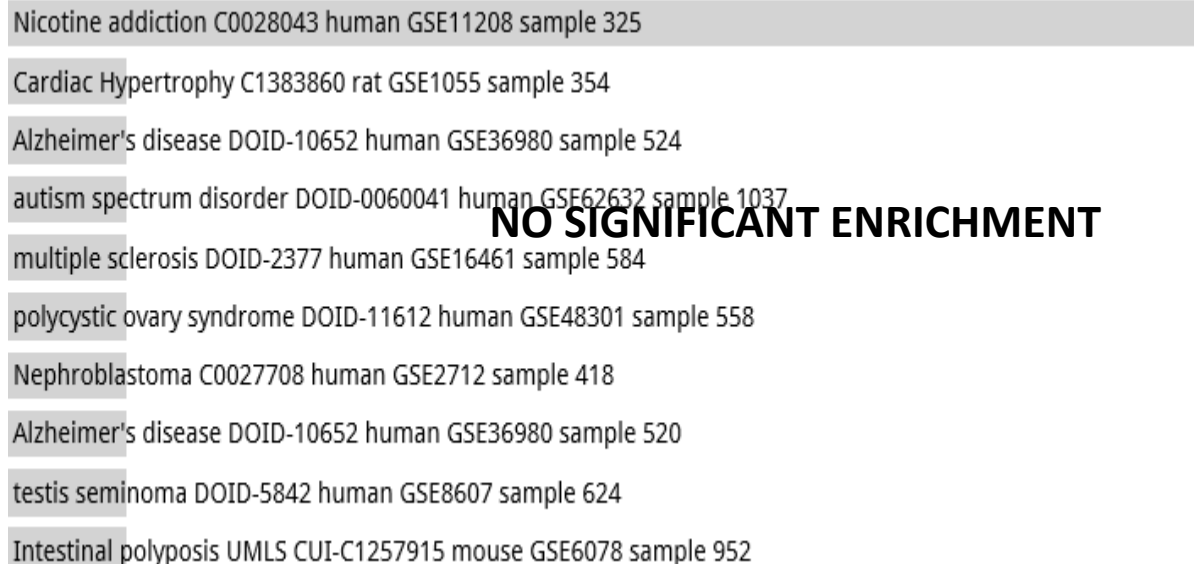

## Disease Perturbations from GEO down random 6000 genes

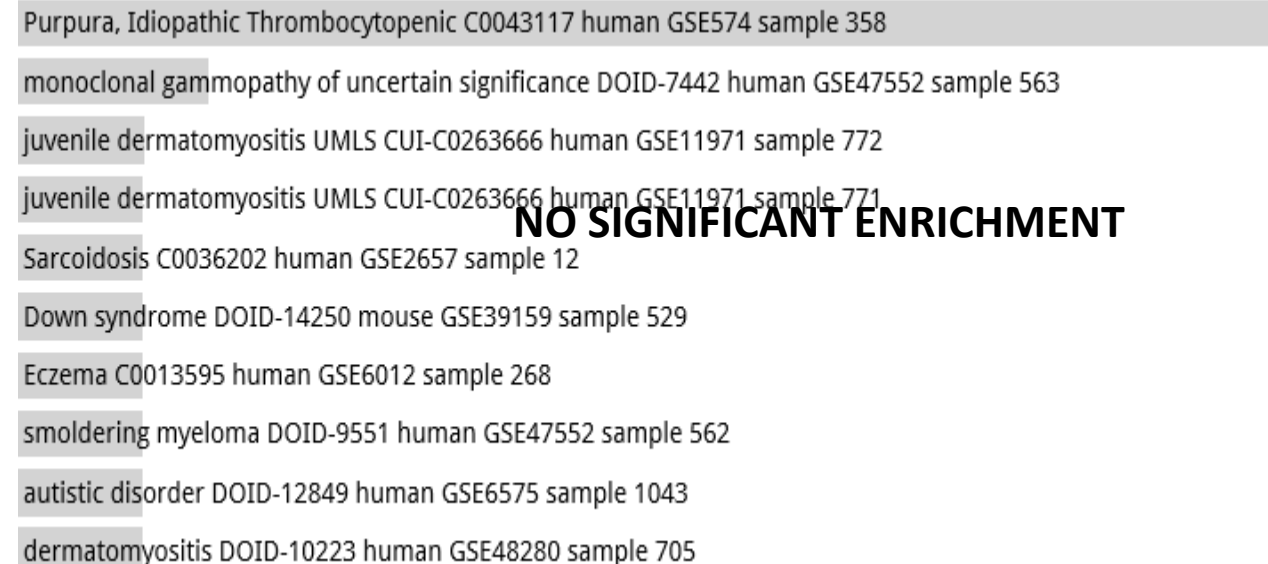

## Random Set 7

## Allen Brain Atlas up random 6847 genes

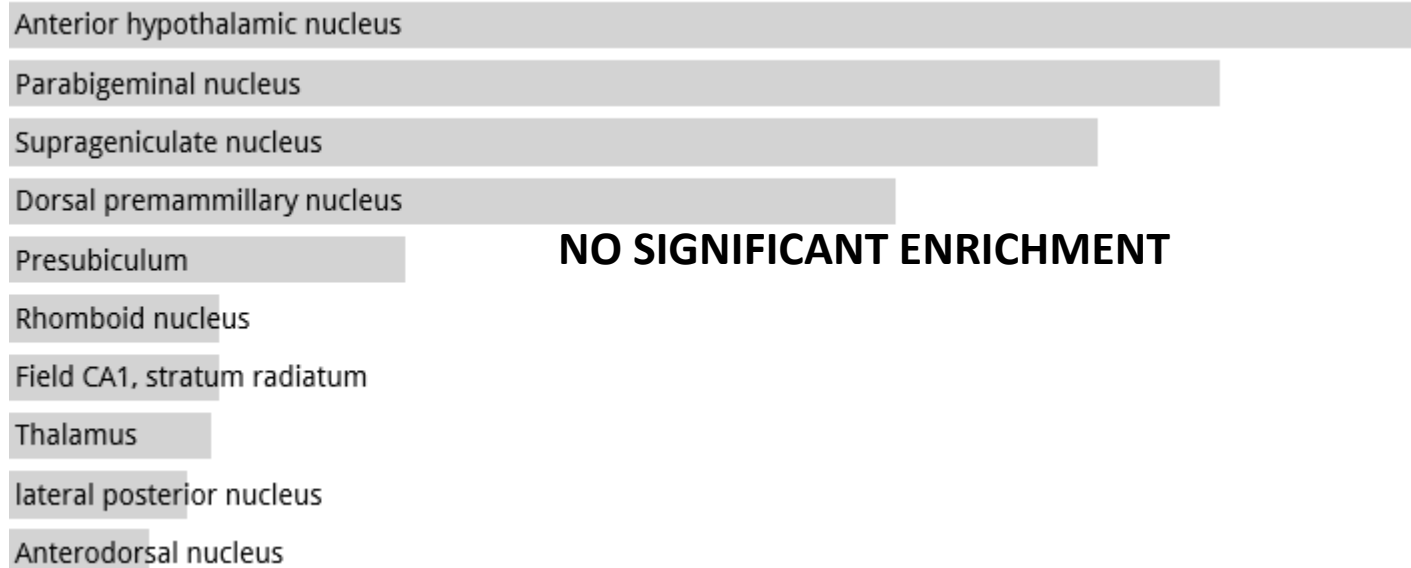

## Random Set 8

ARCHS4 Tissues random 6001 genes

GASTRIC TISSUE (BULK)

SKIN (BULK TISSUE)

RENAL CORTEX

KIDNEY (BULK TISSUE)

PREFRONTAL CORTEX

PANCREATIC ISLET

SPINAL CORD (BULK)

SMALL INTESTINE (BULK TISSUE)

COLON (BULK TISSUE)

SPINAL CORD

**NO SIGNIFICANT ENRICHMENT**

Jensen TISSUES random 6001 genes

**NO DATA AVAILABLE**



## Random Set 8

## Jensen DISEASES random 6001 genes

Early\_myoclonic\_encephalopathy

Salpingitis

Vaginitis

cold-induced\_sweating\_syndrome

Parotitis

Carnitine\_palmitoyltransferase\_II\_deficiency **NO SIGNIFICANT ENRICHMENT**

Poliomyelitis

Factor\_XI\_deficiency

cytochrome-c\_oxidase\_deficiency\_disease

Ascariasis

## Disease Perturbations from GEO up random 6000 genes

pancreatic ductal adenocarcinoma DOID-3498 mouse GSE53659 sample 699

Schistosomiasis C0036323 mouse GSE19525 sample 439

juvenile dermatomyositis UMLS CUI-C0263666 human GSE11971 sample 772

juvenile dermatomyositis UMLS CUI-C0263666 human GSE11971 sample 771

amyotrophic lateral sclerosis DOID-332 mouse GSE10953 sample 679

pancreatic ductal adenocarcinoma DOID-3498 human GSE15471 sample 604

nemaline myopathy DOID-3191 mouse GSE3384 sample 974

asthma DOID-2841 human GSE31773 sample 714

glaucoma associated with systemic syndromes DOID-1686 mouse GSE26299 sample 488

Congestive heart disease C0018802 mouse GSE2236 sample 258

**NO SIGNIFICANT ENRICHMENT**

## Disease Perturbations from GEO down random 6000 genes

acute myocarditis DOID-3951 mouse GSE35182 sample 801

pulmonary tuberculosis DOID-2957 mouse GSE48027 sample 831

autistic disorder DOID-12849 human GSE6575 sample 1043

Purpura, Idiopathic Thrombocytopenic C0043117 human GSE574 sample 358

amyotrophic lateral sclerosis DOID-332 mouse GSE10953 sample 679

Nicotine addiction C0028043 human GSE11208 sample 325

sickle-cell anemia DOID-10923 human GSE16728 sample 505

polycystic ovary syndrome DOID-11612 human GSE48301 sample 558

autism spectrum disorder DOID-0060041 human GSE62632 sample 1037

Cardiac Hypertrophy C1383860 rat GSE1055 sample 354

**NO SIGNIFICANT ENRICHMENT**

## Random Set 8

### Allen Brain Atlas up random 6001 genes

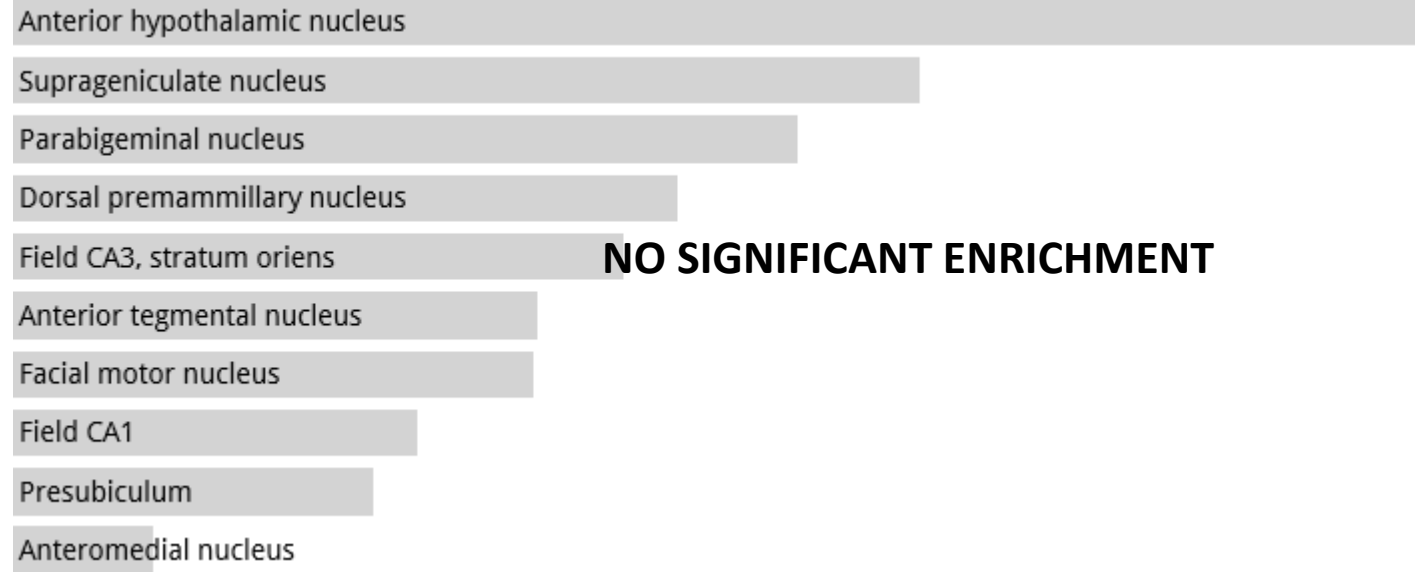

## Random Set 9

### ARCHS4 Tissues random 6000 genes

COLONIC MUCOSA

PREFRONTAL CORTEX

VENTRICLE

ASTROCYTE

MYOBLAST

BRAIN (BULK)

FETAL BRAIN CORTEX

NEURONAL EPITHELIUM

ATRIUM

ADIPOSE (BULK TISSUE)

**NO SIGNIFICANT ENRICHMENT**

### Jensen TISSUES random 6000 genes

**NO DATA AVAILABLE**

## Random Set 9

## Jensen DISEASES random 6000 genes

Hereditary\_mucosal\_leukokeratosis

Dumping\_syndrome

X-linked\_endothelial\_corneal\_dystrophy

Clouston\_syndrome

Enlarged\_vestibular\_aqueduct

Oculodentodigital\_dysplasia

Porphyria\_cutanea\_tarda

MEDNIK\_syndrome

Granulomatous\_amebic\_encephalitis

Pachyonychia\_congenita

**NO SIGNIFICANT ENRICHMENT**

**NO SIGNIFICANT ENRICHMENT**

## Disease Perturbations from GEO up random 6000 genes

Dental cavity, complex C0399396 human GSE1629 sample 175

actinic keratosis DOID-8866 human GSE2503 sample 628

Actinic keratosis C0022602 human GSE2503 sample 350

acute myeloid leukemia DOID-9119 human GSE9476 sample 782

Epilepsy C0014544 human GSE7486 sample 417

epidermolysis bullosa simplex DOID-4644 human GSE28315 sample 711

lupus erythematosus DOID-8857 human GSE30153 sample 739

cardiomyopathy DOID-0050700 human GSE9128 sample 781

type 2 diabetes mellitus DOID-9352 human GSE23343 sample 895

autism spectrum disorder DOID-0060041 human GSE25507 sample 1032

**NO SIGNIFICANT ENRICHMENT**

## Disease Perturbations from GEO down random 6000 genes

multiple myeloma DOID-9538 human GSE6691 sample 787

Smoldering multiple myeloma C1531608 human GSE5900 sample 404

autistic disorder DOID-12849 human GSE6575 sample 1043

acute myocarditis DOID-3951 mouse GSE35182 sample 801

pulmonary tuberculosis DOID-2957 mouse GSE48027 sample 831

autistic disorder DOID-12849 human GSE6575 sample 1042

mental retardation DOID-1059 human GSE6575 sample 1044

Septic Shock C0036983 human GSE9692 sample 307

West Nile fever DOID-2366 human GSE30719 sample 874

Waldenstrom Macroglobulinemia UMLS CUI-C0024419 human GSE6691 sample 785

**NO SIGNIFICANT ENRICHMENT**

## Random Set 9

## Allen Brain Atlas up random 6000 genes

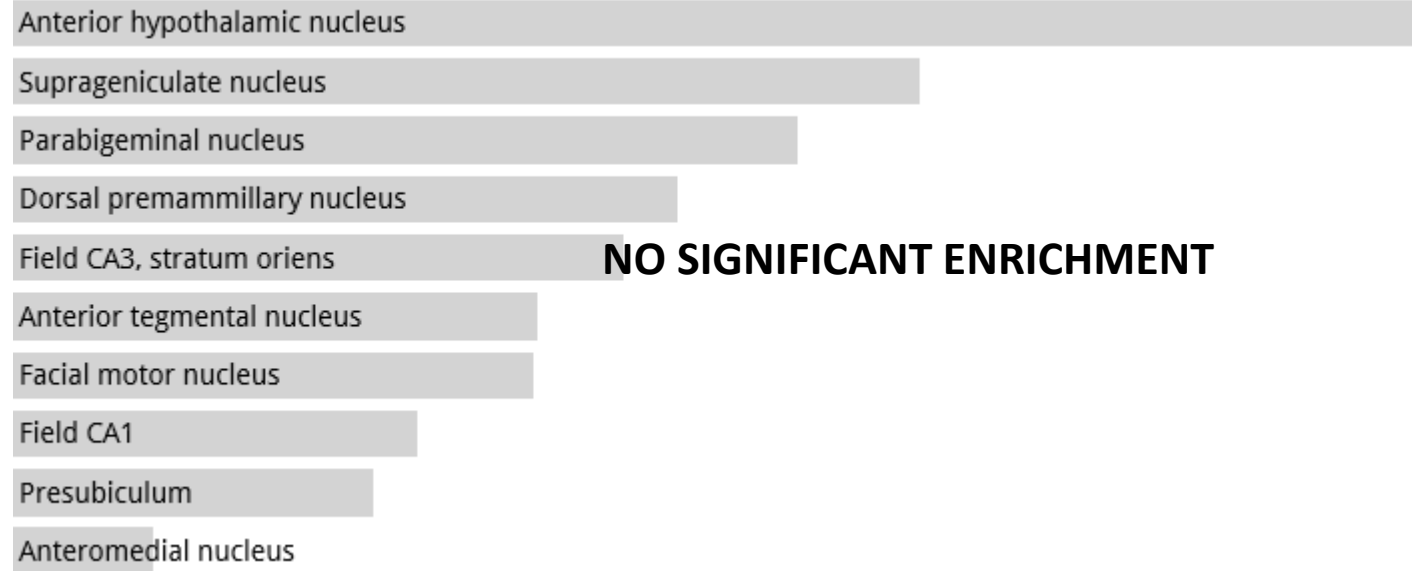

## Random Set 10

ARCHS4 Tissues random 6000 genes

GASTRIC TISSUE (BULK)

PREFRONTAL CORTEX

OMENTUM

COLON (BULK TISSUE)

LUNG (BULK TISSUE)

NEURONAL EPITHELIUM

LIVER (BULK TISSUE)

FETAL BRAIN CORTEX

RENAL CORTEX

AMNIOTIC FLUID

**NO SIGNIFICANT ENRICHMENT**

Jensen TISSUES random 6000 genes

**NO DATA AVAILABLE**

## Random Set 10

## Jensen DISEASES random 6000 genes

Laryngeal\_squamous\_cell\_carcinoma

Urinary\_schistosomiasis

Ebola\_hemorrhagic\_fever

Hermaphroditism

Irritant\_dermatitis

Zellweger\_syndrome

Aortic\_valve\_insufficiency

Scimitar\_syndrome

Gastric\_lymphoma

Multiple\_chemical\_sensitivity

**NO SIGNIFICANT ENRICHMENT**

## Disease Perturbations from GEO up random 6000 genes

Alzheimer's disease DOID-10652 human GSE36980 sample 519

polycystic ovary syndrome DOID-11612 human GSE48301 sample 558

Cardiac Hypertrophy C1383860 rat GSE1055 sample 354

ulcerative colitis DOID-8577 human GSE37283 sample 594

pancreatic ductal adenocarcinoma DOID-3498 mouse GSE53659 sample 699

juvenile dermatomyositis UMLS CUI-C0263666 human GSE11971 sample 772

amyotrophic lateral sclerosis DOID-332 mouse GSE10953 sample 679

juvenile dermatomyositis UMLS CUI-C0263666 human GSE11971 sample 771

nemaline myopathy DOID-3191 mouse GSE3384 sample 974

nemaline myopathy DOID-3191 mouse GSE3384 sample 971

**NO SIGNIFICANT ENRICHMENT**

## Disease Perturbations from GEO down random 6000 genes

pulmonary tuberculosis DOID-2957 mouse GSE48027 sample 831

acute myocarditis DOID-3951 mouse GSE35182 sample 801

amyotrophic lateral sclerosis DOID-332 mouse GSE10953 sample 679

nemaline myopathy DOID-3191 mouse GSE3384 sample 971

Down syndrome DOID-14250 mouse GSE39159 sample 529

Cardiomyopathy, Dilated C0007193 human GSE3586 sample 323

Purpura, Idiopathic Thrombocytopenic C0043117 human GSE574 sample 358

acute myocardial infarction DOID-9408 mouse GSE775 sample 1000

papillary thyroid carcinoma DOID-3969 human GSE54958 sample 652

juvenile dermatomyositis UMLS CUI-C0263666 human GSE11971 sample 772

**NO SIGNIFICANT ENRICHMENT**

## Random Set 10

## Allen Brain Atlas up random 6000 genes

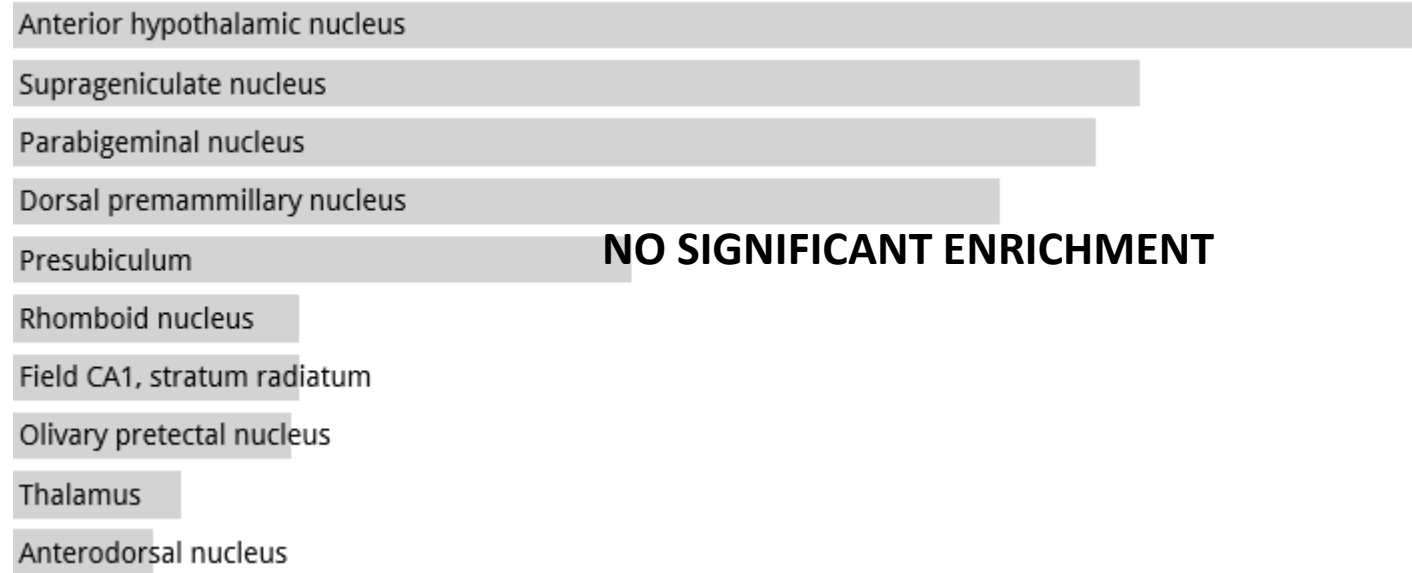



## Random Set 11

ARCHS4 Tissues random 4000 genes

OMENTUM

VENTRICLE

SKIN (BULK TISSUE)

WHARTONS JELLY

VASCULAR SMOOTH MUSCLE

OVARY (BULK TISSUE)

CEREBELLUM

CHONDROCYTE

THYROID (BULK TISSUE)

SPINAL CORD (BULK)

**NO SIGNIFICANT ENRICHMENT**

Jensen TISSUES random 4000 genes

**NO DATA AVAILABLE**

## Random Set 11

## Jensen DISEASES random 4000 genes

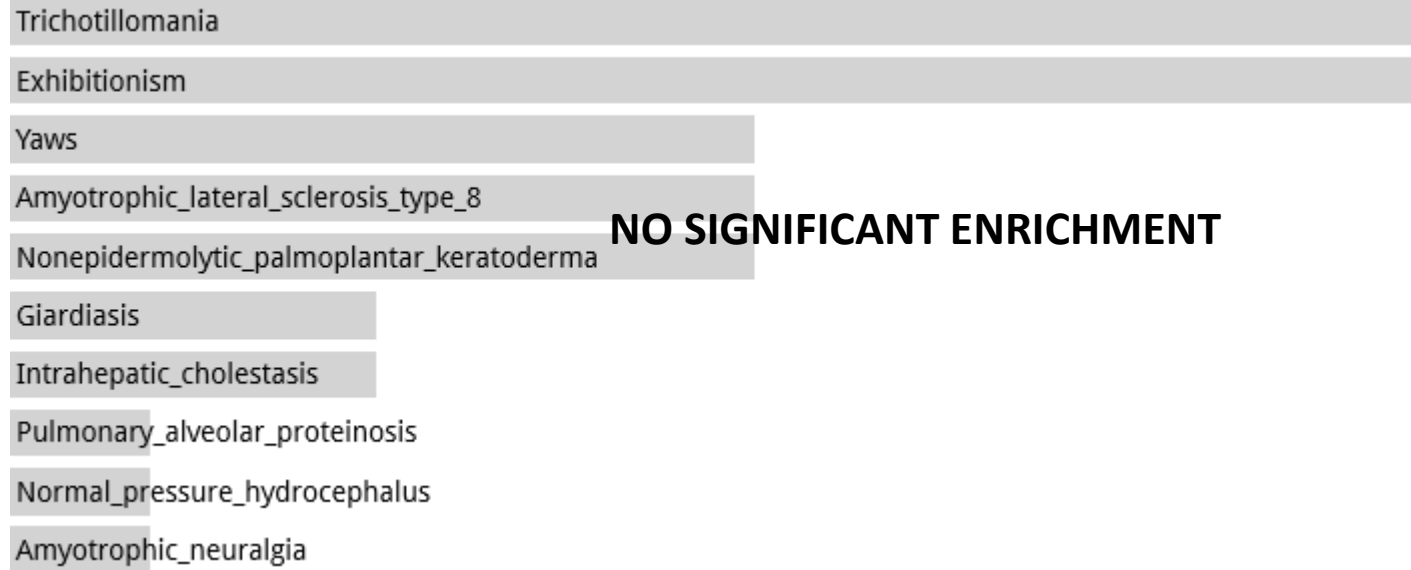

## Disease Perturbations from GEO up random 4000 genes

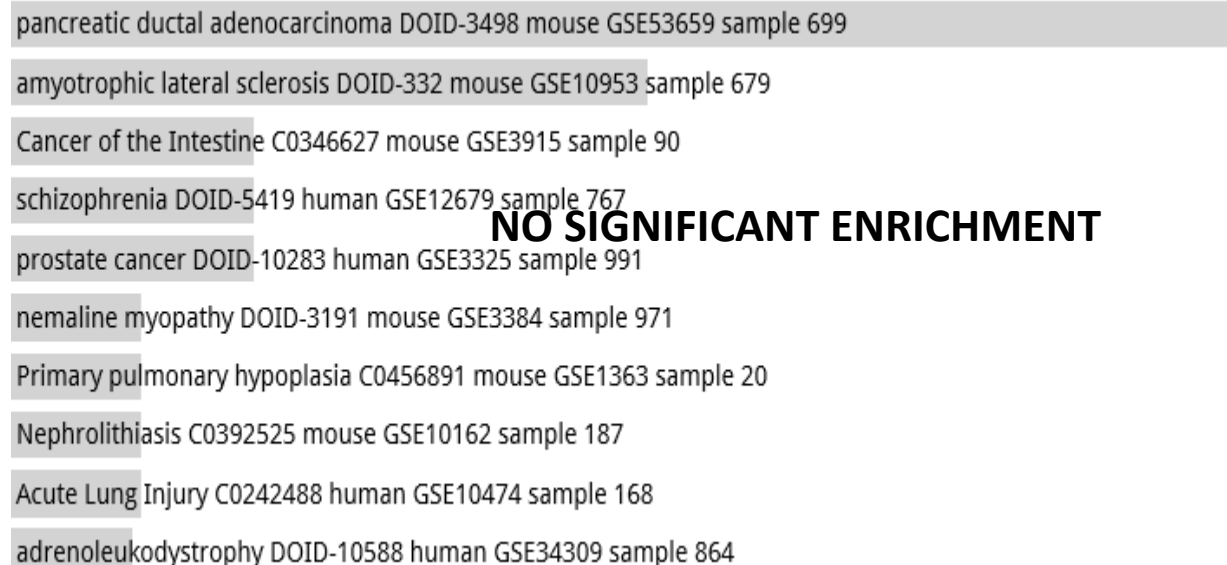

## Disease Perturbations from GEO down random 4000 genes

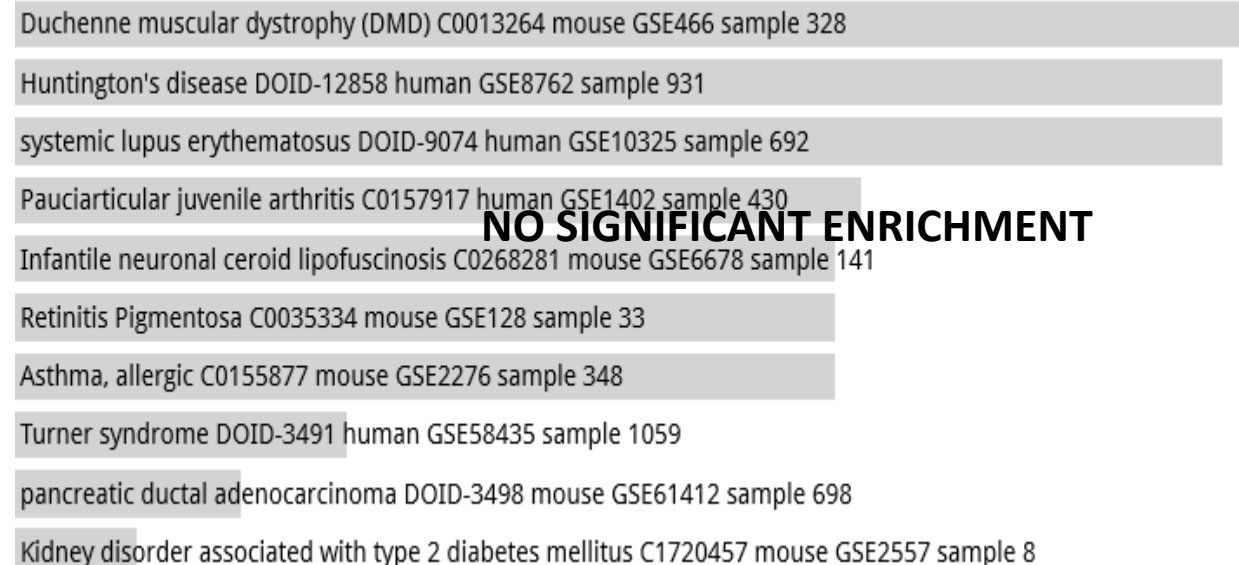

## Random Set 11

## Allen Brain Atlas up random 4000 genes

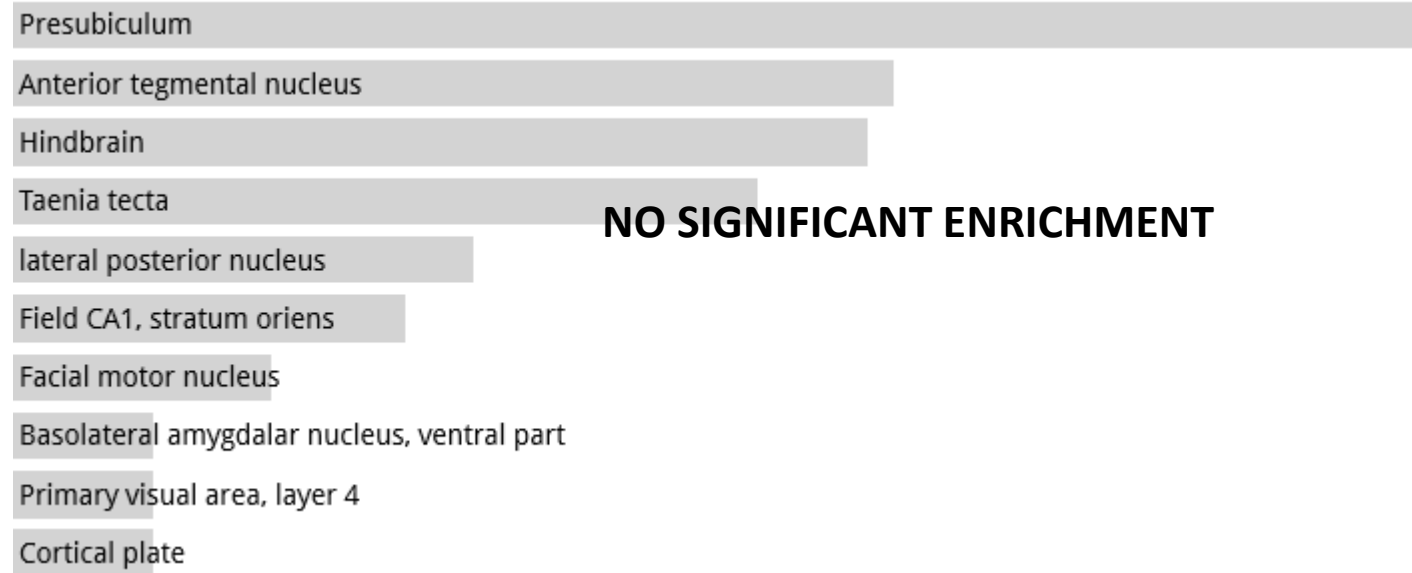

## Random Set 12

ARCHS4 Tissues random 4000 genes

GASTRIC TISSUE (BULK)

RENAL CORTEX

SKIN (BULK TISSUE)

SMALL INTESTINE (BULK TISSUE)

PANCREATIC ISLET

PREFRONTAL CORTEX

KIDNEY (BULK TISSUE)

SPINAL CORD (BULK)

PLACENTA (BULK)

SPINAL CORD

**NO SIGNIFICANT ENRICHMENT**

Jensen TISSUES random 4000 genes

**NO DATA AVAILABLE**

## Random Set 12

## Jensen DISEASES random 4000 genes

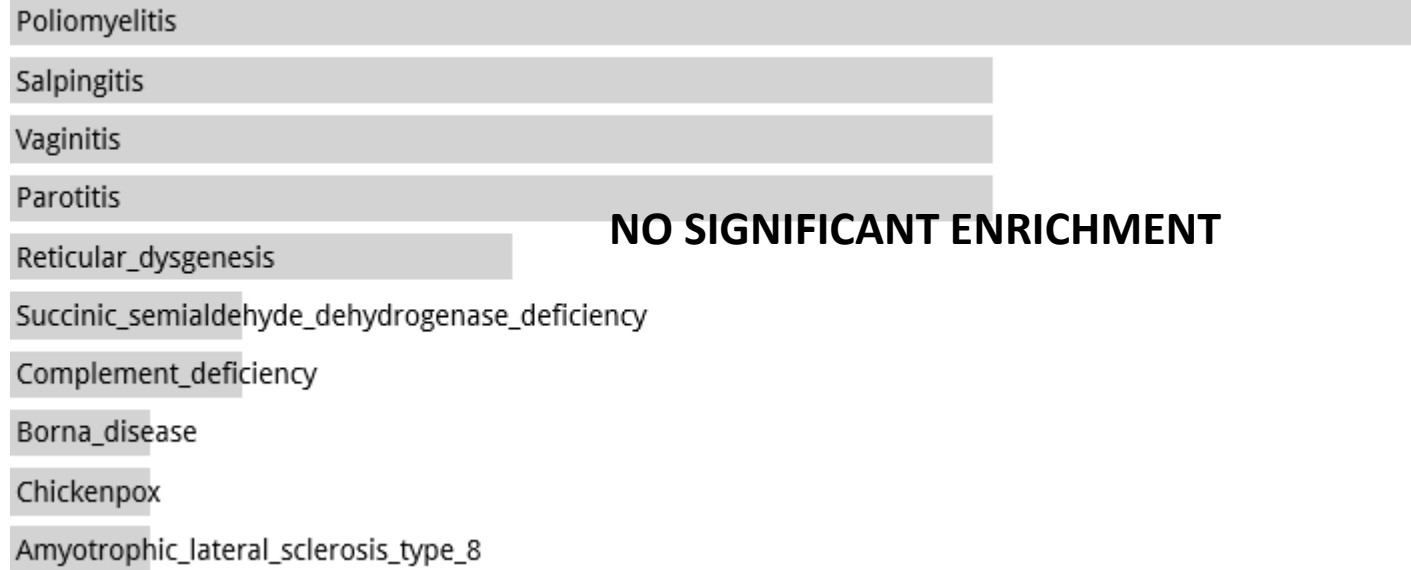

## Disease Perturbations from GEO up random 4000 genes

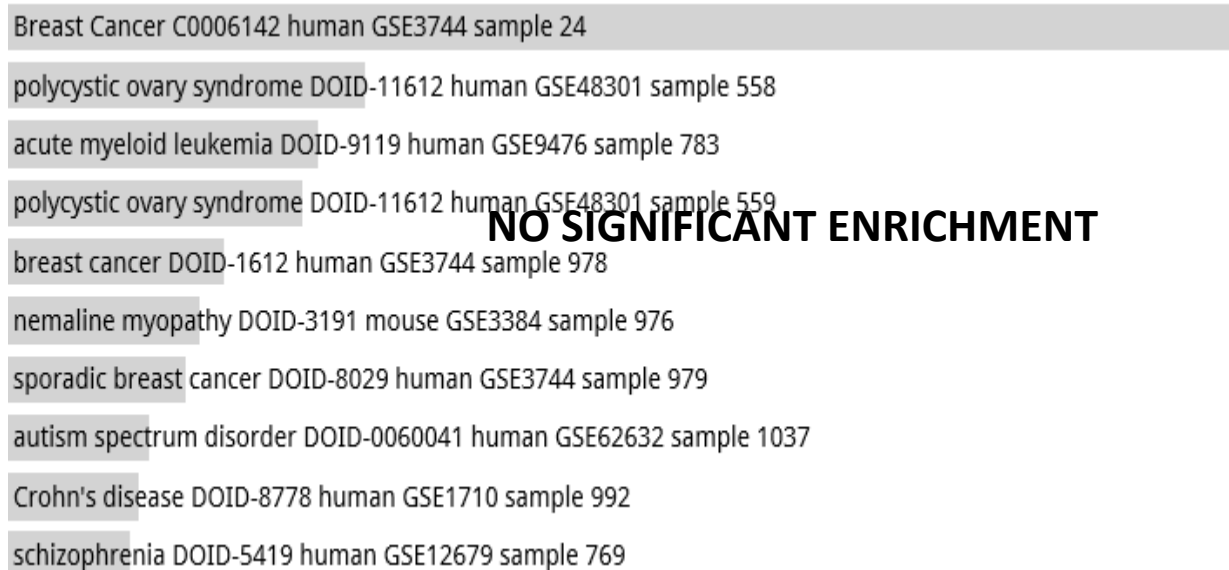

## Disease Perturbations from GEO down random 4000 genes

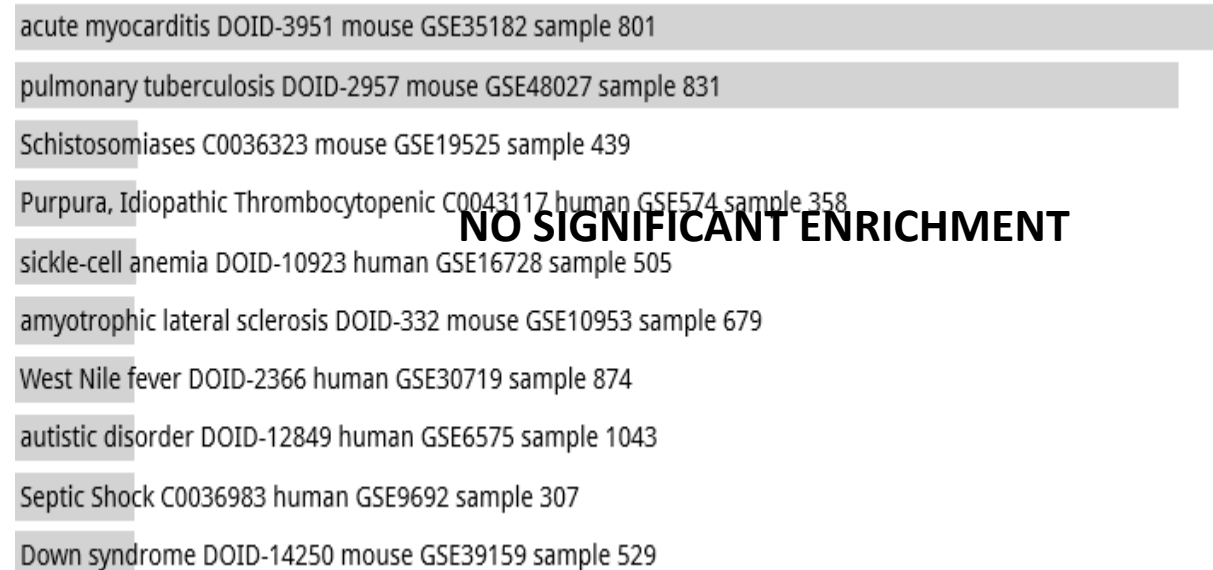

## Random Set 12

## Allen Brain Atlas up random 4000 genes

dorsal juxtacommissural pretectal nucleus

periventricular stratum of JcPL

JcPL part of the periaqueductal gray

periventricular stratum of PcPL

mantle zone of JcPD

PcPL part of the periaqueductal gray

intermediate stratum of JcPD

dorsal part of JcP

CoPV part of the periaqueductal gray

periventricular stratum of CoPV

**NO SIGNIFICANT ENRICHMENT**

## Random Set 13

ARCHS4 Tissues random 4000 genes

COLON (BULK TISSUE)

ILEUM (BULK)

SMALL INTESTINE (BULK TISSUE)

GASTRIC TISSUE (BULK)

OMENTUM

NEURONAL EPITHELIUM

SKIN (BULK TISSUE)

CEREBELLUM

PREFRONTAL CORTEX

MYOBLAST

**NO SIGNIFICANT ENRICHMENT**

Jensen TISSUES random 4000 genes

**NO DATA AVAILABLE**

## Random Set 13

## Jensen DISEASES random 4000 genes

cytochrome-c\_oxidase\_deficiency\_disease

Cockayne\_syndrome

Arterial\_tortuosity\_syndrome

cold-induced\_sweating\_syndrome

**NO SIGNIFICANT ENRICHMENT**

Esotropia

Xeroderma\_pigmentosum

Favism

Placenta\_praevia

Carnitine\_palmitoyltransferase\_II\_deficiency

Patent\_foramen\_ovale

## Disease Perturbations from GEO up random 4000 genes

autism spectrum disorder DOID-0060041 human GSE62632 sample 1037

Severe acute respiratory syndrome (SARS) C1175175 human GSE1739 sample 165

Nicotine addiction C0028043 human GSE11208 sample 325

ulcerative colitis DOID-8577 human GSE37283 sample 594

**NO SIGNIFICANT ENRICHMENT**

COPD - Chronic obstructive pulmonary disease C0024117 human GSE3320 sample 255

asthma DOID-2841 human GSE43696 sample 827

Idiopathic fibrosing alveolitis C0085786 human GSE10921 sample 272

Cancer of the testis C0153594 human GSE1818 sample 246

bipolar disorder DOID-3312 human GSE5392 sample 573

Ulcerative Colitis C0009324 human GSE1710 sample 264

## Disease Perturbations from GEO down random 4000 genes

autistic disorder DOID-12849 human GSE6575 sample 1043

Purpura, Idiopathic Thrombocytopenic C0043117 human GSE574 sample 358

pulmonary tuberculosis DOID-2957 mouse GSE48027 sample 831

sickle-cell anemia DOID-10923 human GSE16728 sample 506

**NO SIGNIFICANT ENRICHMENT**

acute myocarditis DOID-3951 mouse GSE35182 sample 802

amyotrophic lateral sclerosis DOID-332 mouse GSE10953 sample 679

Septic Shock C0036983 human GSE9692 sample 307

Down syndrome DOID-14250 mouse GSE39159 sample 529

juvenile dermatomyositis UMLS CUI-C0263666 human GSE11971 sample 772

amyotrophic lateral sclerosis DOID-332 human GSE833 sample 1007



## Random Set 13

## Allen Brain Atlas up random 4000 genes

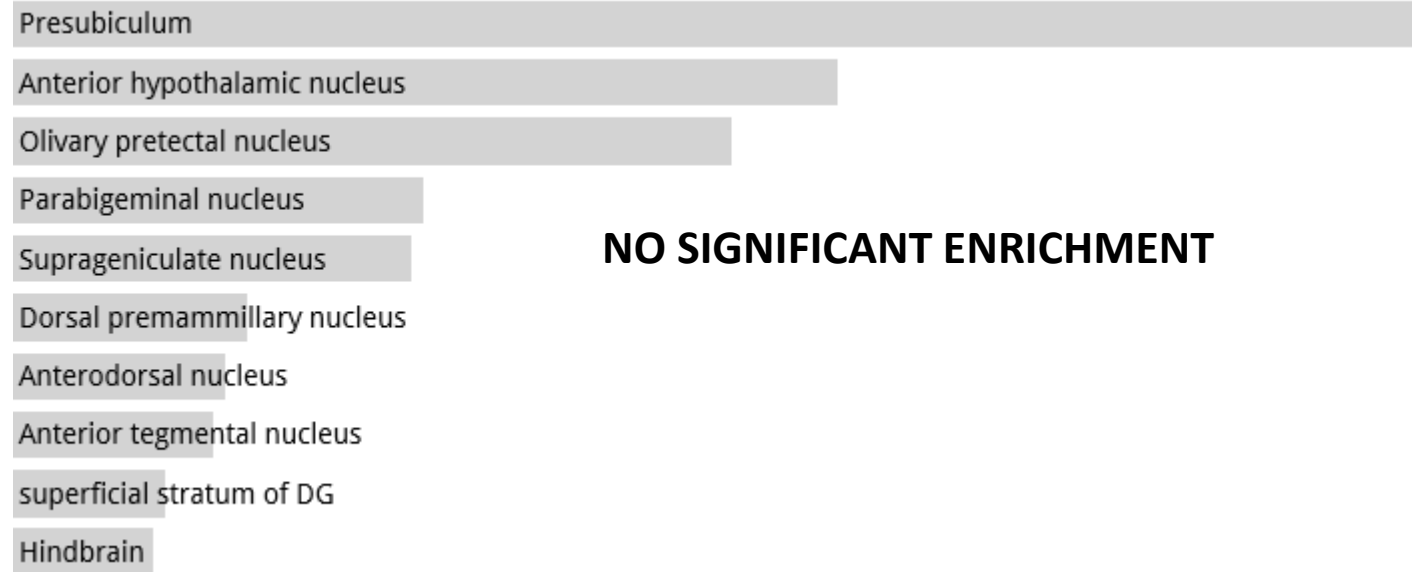

## Random Set 14

ARCHS4 Tissues random 4000 genes

COLONIC MUCOSA

p-value: 0.0048; Adjusted p-value: 0.5188

CD19+ B CELLS

BLYMPHOCYTE

ILEUM (BULK)

**NO SIGNIFICANT ENRICHMENT**

COLON (BULK TISSUE)

PLASMA CELL

GASTRIC TISSUE (BULK)

BLASTOCYST

PERIPHERAL BLOOD

SPLEEN (BULK TISSUE)

Jensen TISSUES random 4000 genes

**NO DATA AVAILABLE**

## Random Set 14

## Jensen DISEASES random 4000 genes

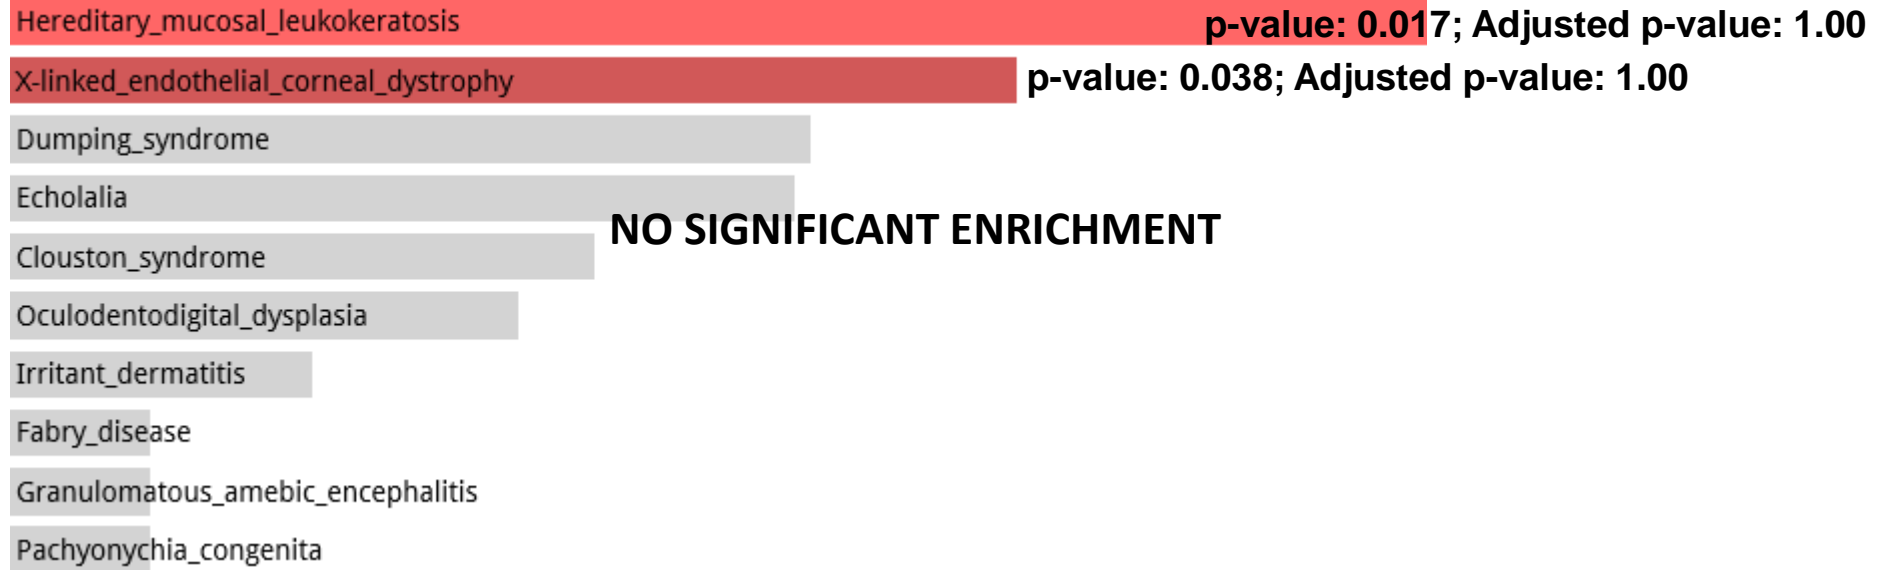

## Disease Perturbations from GEO up random 4000 genes

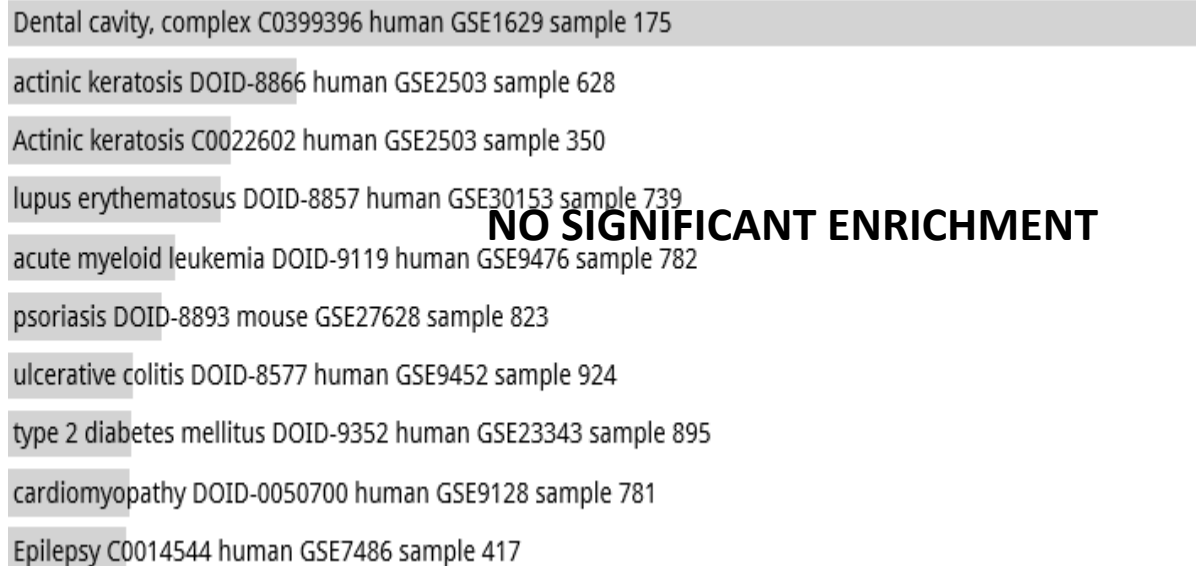

## Disease Perturbations from GEO down random 4000 genes

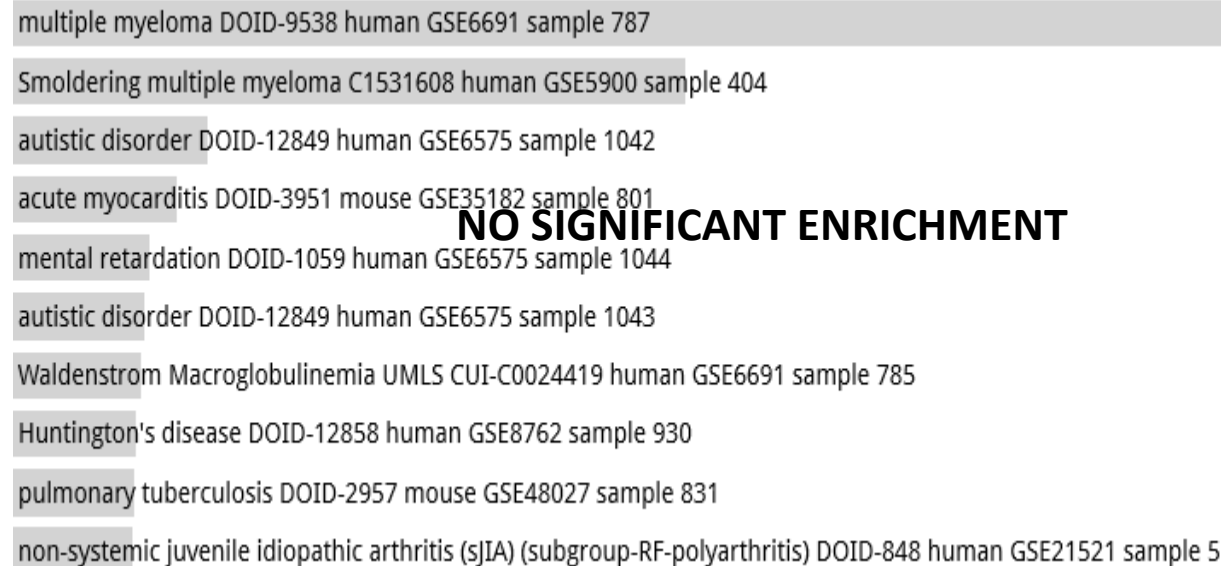

## Random Set 14

## Allen Brain Atlas up random 4000 genes

periventricular stratum of the VAP

Nucleus of the solitary tract, lateral part

Lateral amygdalar nucleus

intermediate stratum of r4Ve

r9 part of the vestibular column

**NO SIGNIFICANT ENRICHMENT**

Lateral reticular nucleus, parvicellular part

mantle zone of r9Ve

r4 part of magnocellular medial vestibular nucleus

periventricular stratum of r8Tr

superficial stratum of r7Lim

## Random Set 15

COLON (BULK TISSUE)

GASTRIC TISSUE (BULK)

PREFRONTAL CORTEX

ILEUM (BULK)

LUNG (BULK TISSUE)

NEURONAL EPITHELIUM

OMENTUM

LIVER (BULK TISSUE)

AMNIOTIC FLUID

RENAL CORTEX

ARCHS4 Tissues random 4000 genes

**NO SIGNIFICANT ENRICHMENT**

Jensen TISSUES random 4000 genes

**NO DATA AVAILABLE**

## Random Set 15

## Jensen DISEASES random 4000 genes

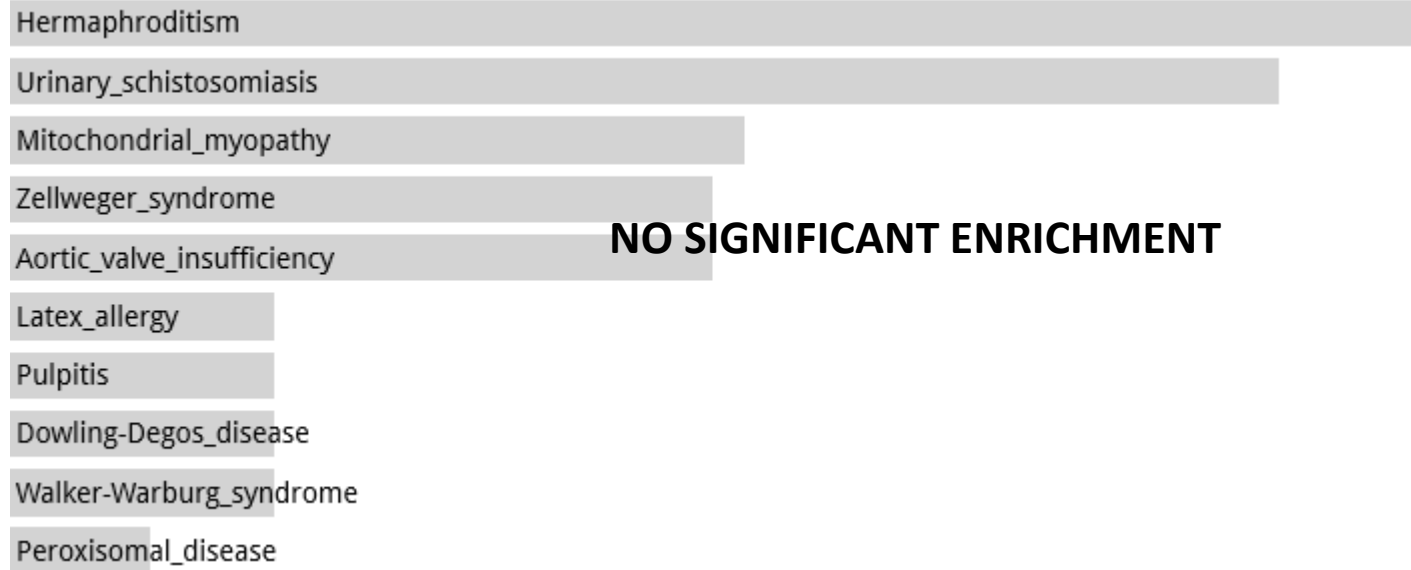

## Disease Perturbations from GEO up random 4000 genes

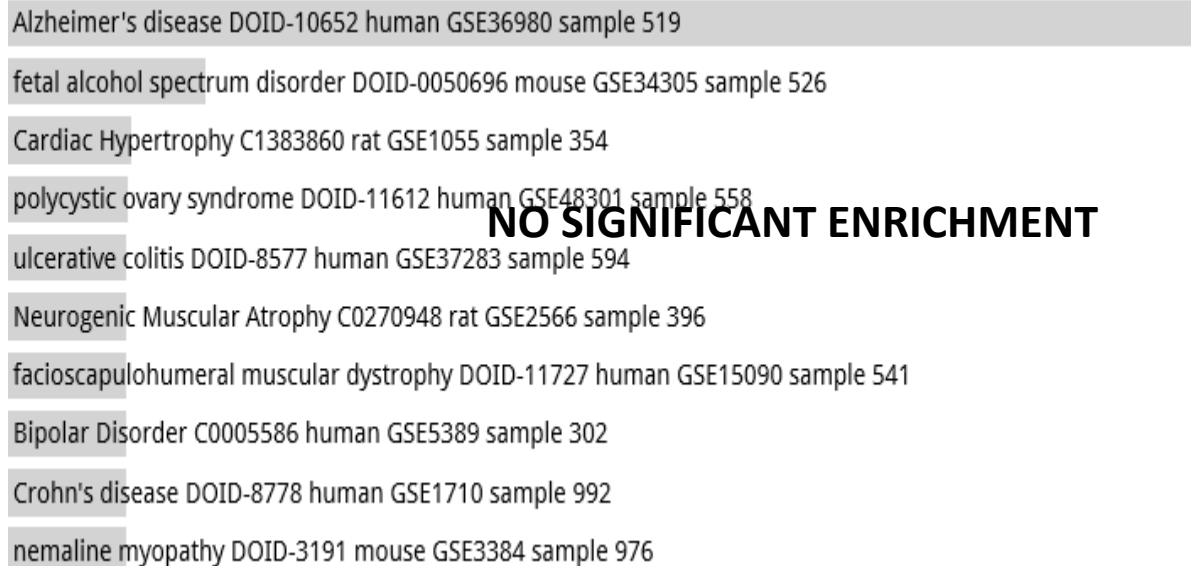

## Disease Perturbations from GEO down random 4000 genes

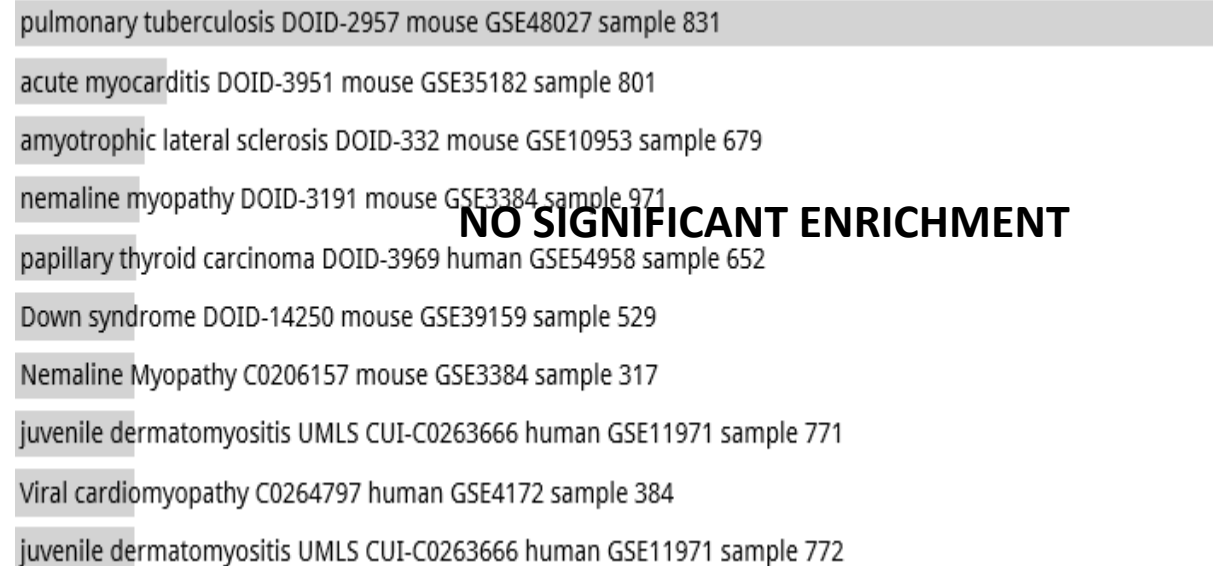

## Random Set 15

## Allen Brain Atlas up random 4000 genes

rhombomere 8

retropontine reticular area

medullary hindbrain (medulla)

Visceral area

colliculus superior

mantle zone of SC

superficial gray layer of SC

Retrosplenial area, dorsal part, layer 1

Paragigantocellular reticular nucleus, dorsal part

Gustatory areas

**NO SIGNIFICANT ENRICHMENT**

## Random Set 16

ARCHS4 Tissues random 4000 genes

PREFRONTAL CORTEX

SPINAL CORD (BULK)

SUPERIOR FRONTAL GYRUS

OMENTUM

SPINAL CORD

LUNG (BULK TISSUE)

NEURONAL EPITHELIUM

FETAL BRAIN CORTEX

ASTROCYTE

BRAIN (BULK)

**NO SIGNIFICANT ENRICHMENT**

Jensen TISSUES random 4000 genes

**NO DATA AVAILABLE**



## Random Set 16

## Jensen DISEASES random 4000 genes

Scimitar\_syndrome

Western\_equine\_encephalitis

Opitz-GBBB\_syndrome

Conversion\_disorder

Gastric\_lymphoma

Cutaneous\_porphyria

Leiomyomatosis

Epididymitis

DNA\_ligase\_IV\_deficiency

Juvenile\_polyposis\_syndrome

**NO SIGNIFICANT ENRICHMENT**

## Disease Perturbations from GEO up random 4000 genes

pancreatic ductal adenocarcinoma DOID-3498 mouse GSE53659 sample 699

amyotrophic lateral sclerosis DOID-332 mouse GSE10953 sample 679

autism spectrum disorder DOID-0060041 human GSE62632 sample 1037

RA (rheumatoid arthritis) C0003873 human GSE3592 sample 183

schizophrenia DOID-5419 human GSE27383 sample 548

Cancer of the Intestine C0346627 mouse GSE3915 sample 90

schizophrenia DOID-5419 human GSE12679 sample 767

Duchenne muscular dystrophy (DMD) C0013264 mouse GSE1472 sample 62

swine influenza DOID-0050211 human GSE48466 sample 498

psoriasis DOID-8893 human GSE26952 sample 982

**NO SIGNIFICANT ENRICHMENT**

## Disease Perturbations from GEO down random 4000 genes

pulmonary tuberculosis DOID-2957 mouse GSE48027 sample 831

Purpura, Idiopathic Thrombocytopenic C0043117 human GSE574 sample 358

West Nile fever DOID-2366 human GSE30719 sample 874

amyotrophic lateral sclerosis DOID-332 mouse GSE10953 sample 679

Down syndrome DOID-14250 mouse GSE39159 sample 529

pancreatic ductal adenocarcinoma DOID-3498 mouse GSE53659 sample 699

Cardiomyopathy, Dilated C0007193 human GSE3586 sample 323

nemaline myopathy DOID-3191 mouse GSE3384 sample 971

juvenile dermatomyositis UMLS CUI-C0263666 human GSE11971 sample 772

Schistosomiasis C0036323 mouse GSE19525 sample 439

**NO SIGNIFICANT ENRICHMENT**

## Random Set 16

## Allen Brain Atlas up random 4000 genes

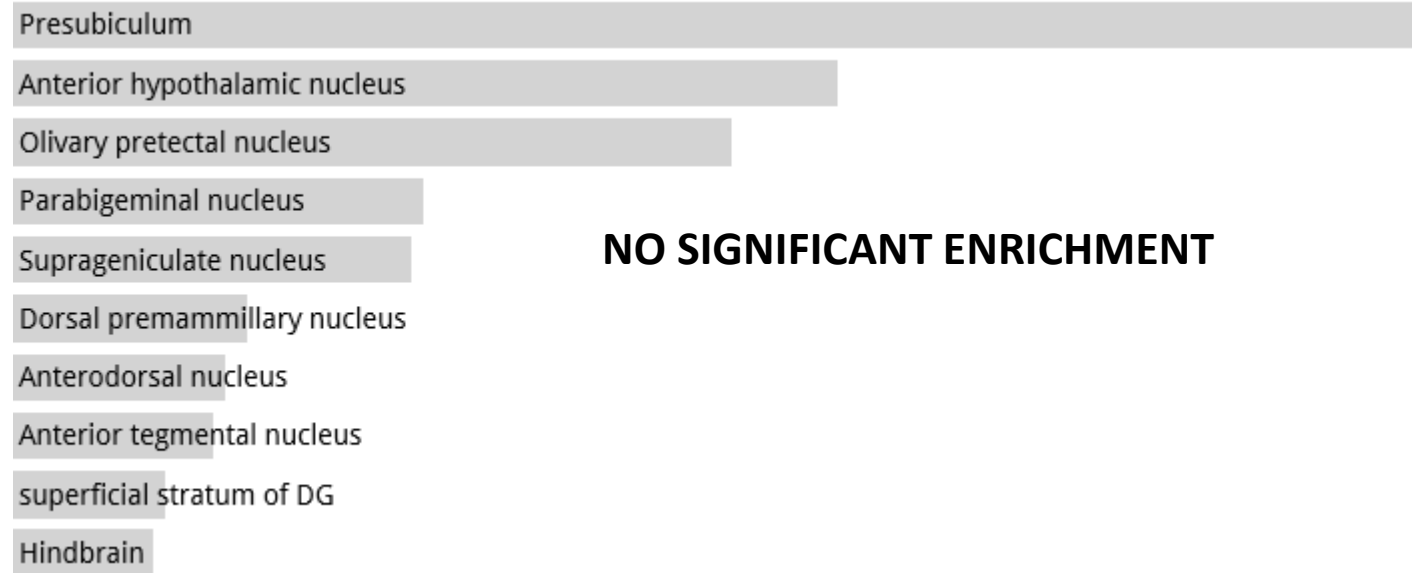

**NO SIGNIFICANT ENRICHMENT**

## Random Set 17

ARCHS4 Tissues random 4000 genes

SMALL INTESTINE (BULK TISSUE)

VASCULAR SMOOTH MUSCLE

SKIN (BULK TISSUE)

THYROID (BULK TISSUE)

STROMAL CELL

RESPIRATORY SMOOTH MUSCLE

RENAL CORTEX

SKELETAL MUSCLE (BULK TISSUE)

REGULATORY T CELLS

PANCREATIC ISLET

**NO SIGNIFICANT ENRICHMENT**

Jensen TISSUES random 4000 genes

**NO DATA AVAILABLE**

## Random Set 17

## Jensen DISEASES random 4000 genes

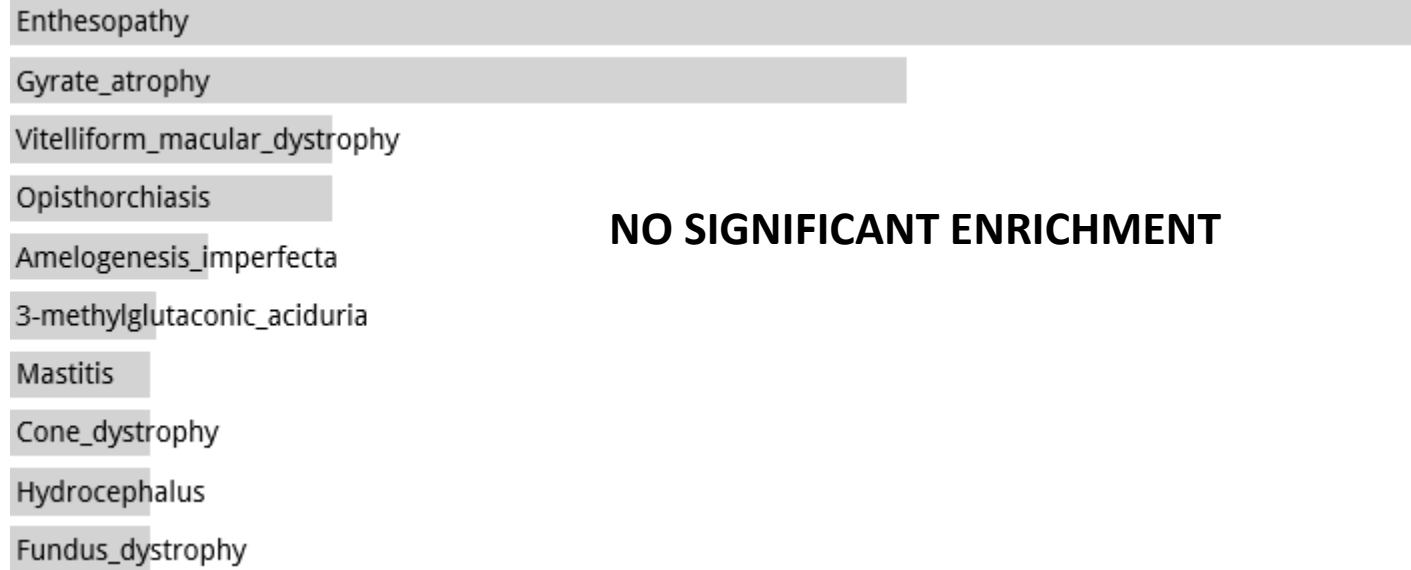

## Disease Perturbations from GEO up random 4000 genes

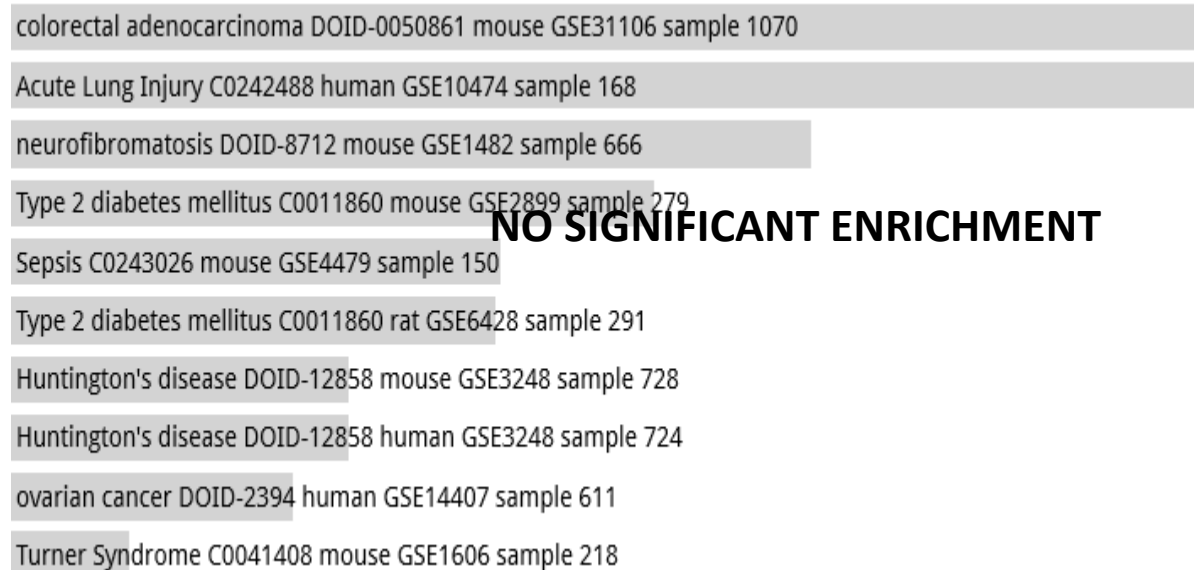

## Disease Perturbations from GEO down random 4000 genes

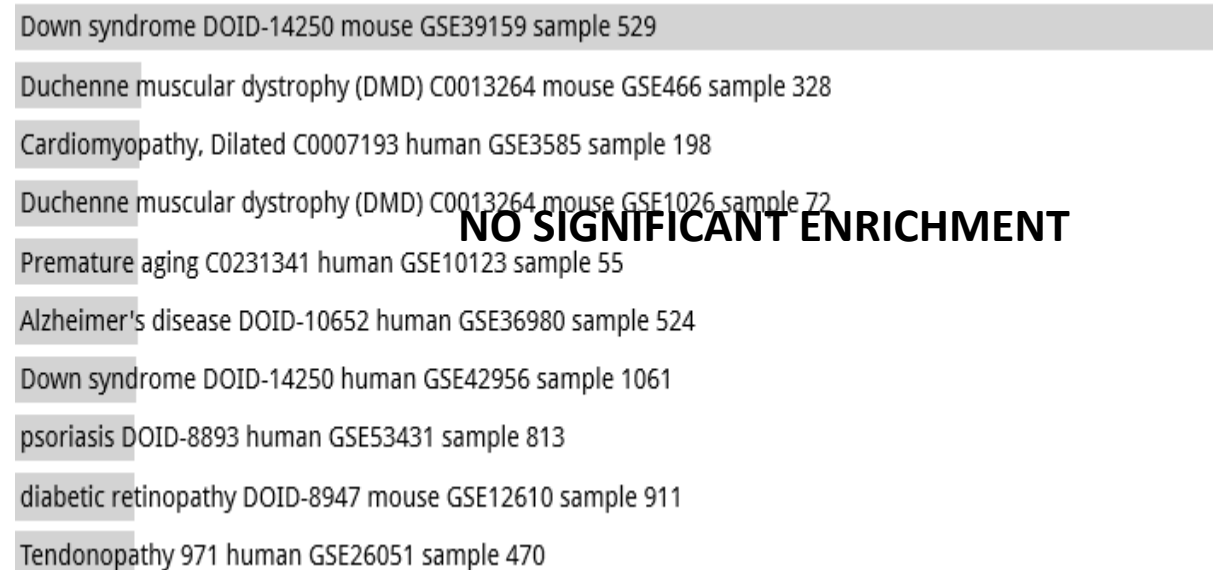

## Random Set 17

## Allen Brain Atlas up random 4000 genes

Presubiculum

Endopiriform nucleus, dorsal part

dorsal endopiriform nucleus

Copula pyramidis

bed nucleus of the external capsule

mantle zone of r7Co

Agranular insular area, posterior part, layer 6a

Entorhinal area, medial part, dorsal zone, layer 5

corticoid layer of TuStr

Infralimbic area, layer 6b

**NO SIGNIFICANT ENRICHMENT**

**Random Set 18**

ARCHS4 Tissues random 4000 genes

**NO DATA AVAILABLE**

Jensen TISSUES random 4000 genes

**NO DATA AVAILABLE**

**Random Set 18**

Jensen DISEASES random 4000 genes

**NO DATA AVAILABLE**

Disease Perturbations from GEO up random 4000 genes

Disease Perturbations from GEO down random 4000 genes

**NO DATA AVAILABLE**

**NO DATA AVAILABLE**

**Random Set 18**

Allen Brain Atlas up random 4000 genes

**NO DATA AVAILABLE**



**Random Set 19**

ARCHS4 Tissues random 4000 genes

**NO DATA AVIALABLE**

Jensen TISSUES random 4000 genes

**NO DATA AVAILABLE**

**Random Set 19**

Jensen DISEASES random 4000 genes

**NO DATA AVAILABLE**

Disease Perturbations from GEO up random 4000 genes

Disease Perturbations from GEO down random 4000 genes

**NO DATA AVAILABLE**

**NO DATA AVAILABLE**

**Random Set 19**

Allen Brain Atlas up random 4000 genes

**NO DATA AVAILABLE**

## Random Set 20

### ARCHS4 Tissues random 4000 genes

LYMPHOCYTE

BLASTOCYST

BLOOD DENDRITIC CELLS

BONE MARROW (BULK TISSUE)

SPINAL CORD (BULK)

GASTRIC TISSUE (BULK)

SPINAL CORD

MOTOR NEURON

PREFRONTAL CORTEX

NEURONAL EPITHELIUM

**NO SIGNIFICANT ENRICHMENT**

### Jensen TISSUES random 4000 genes

**NO DATA AVAILABLE**

## Random Set 20

## Jensen DISEASES random 4000 genes

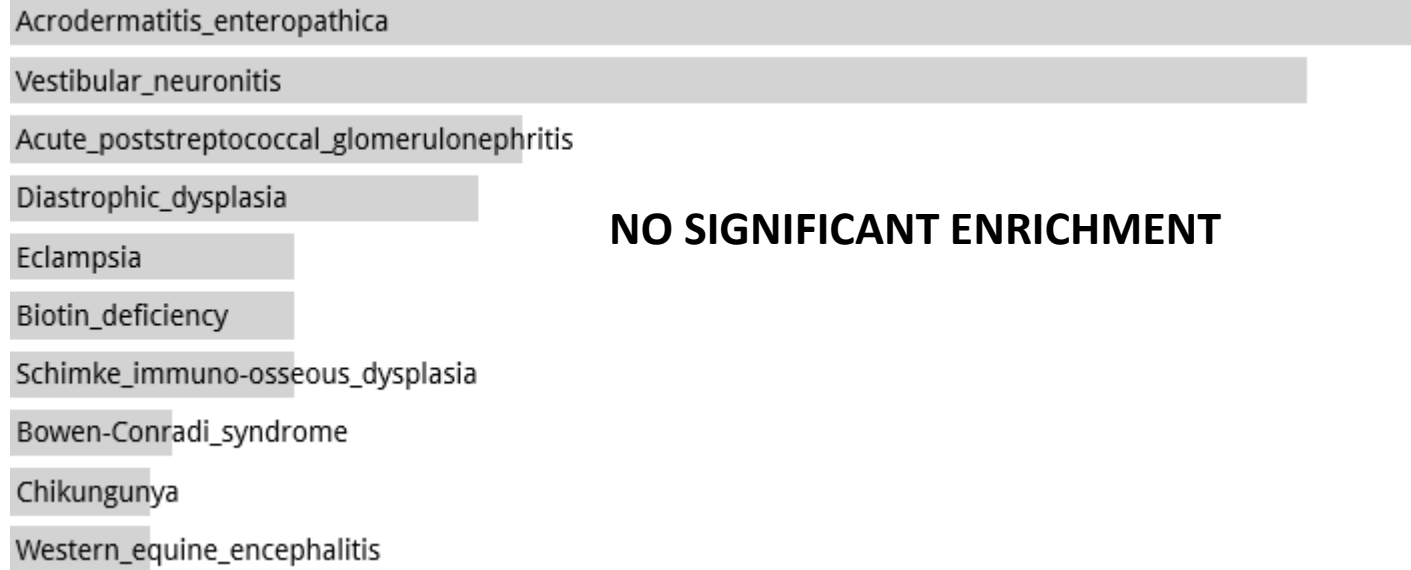

## Disease Perturbations from GEO up random 4000 genes

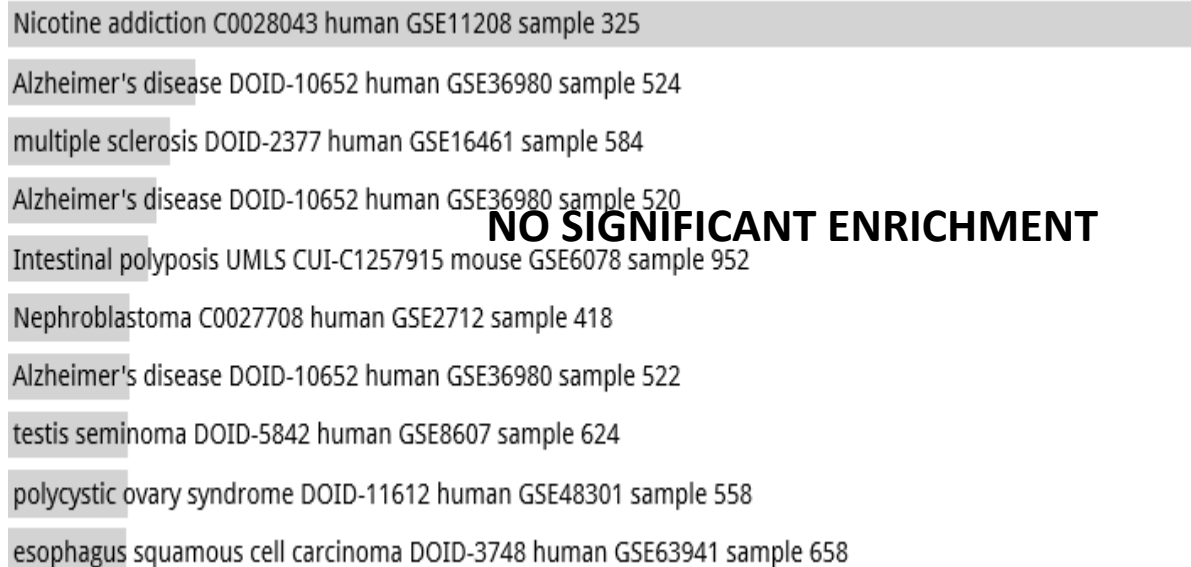

## Disease Perturbations from GEO down random 4000 genes

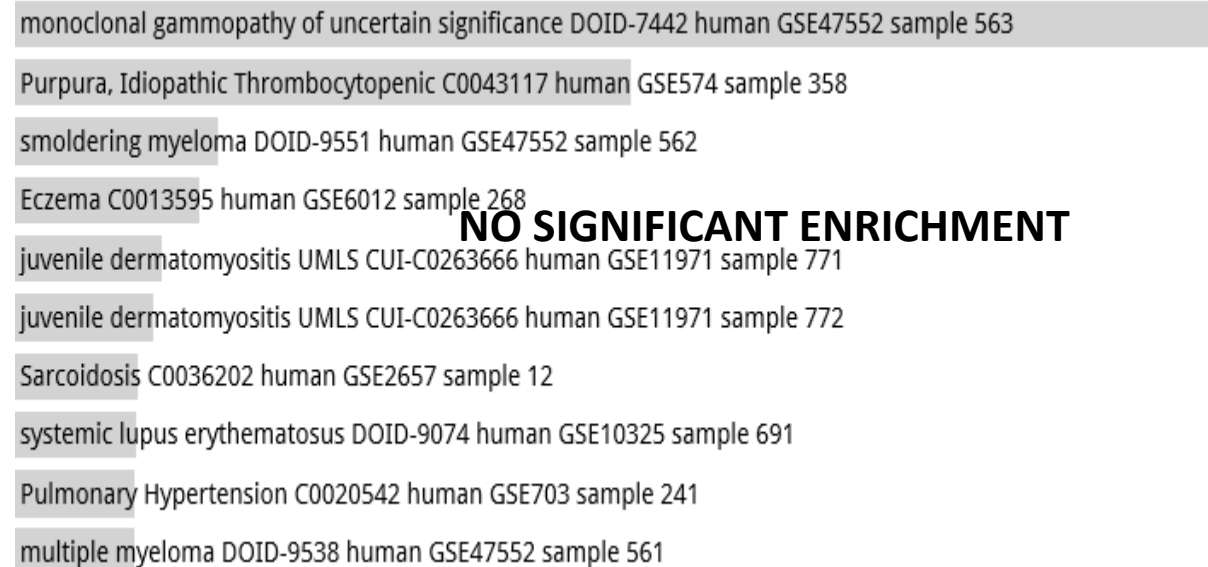

## Random Set 20

## Allen Brain Atlas up random 4000 genes



## Random Set 21

### ARCHS4 Tissues random 2847 genes

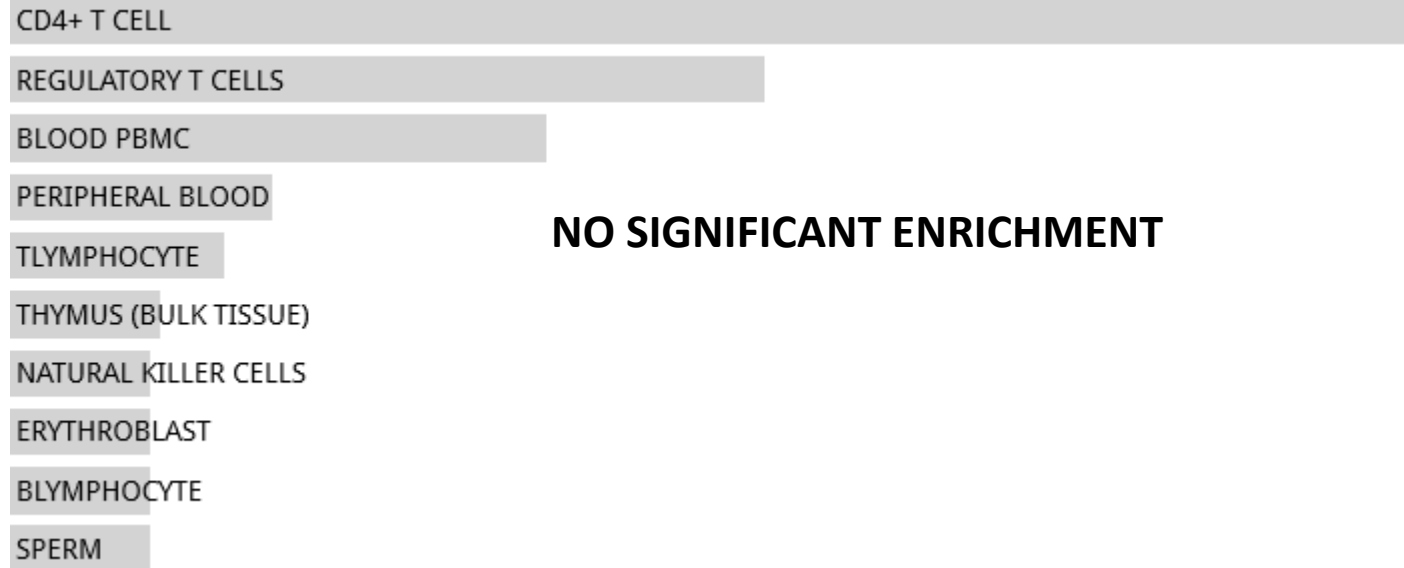

### Jensen TISSUES random 2847 genes

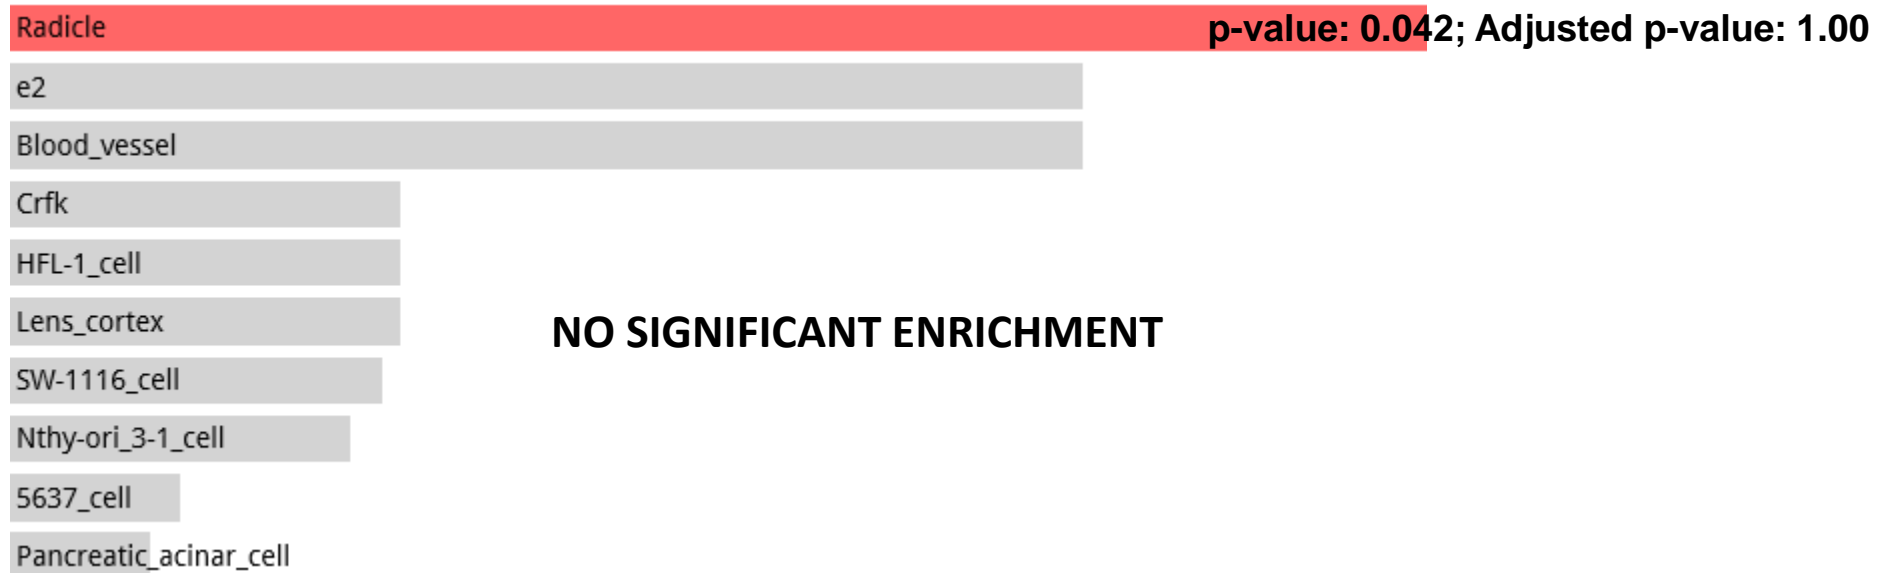

## Random Set 21

## Jensen DISEASES random 2847 genes

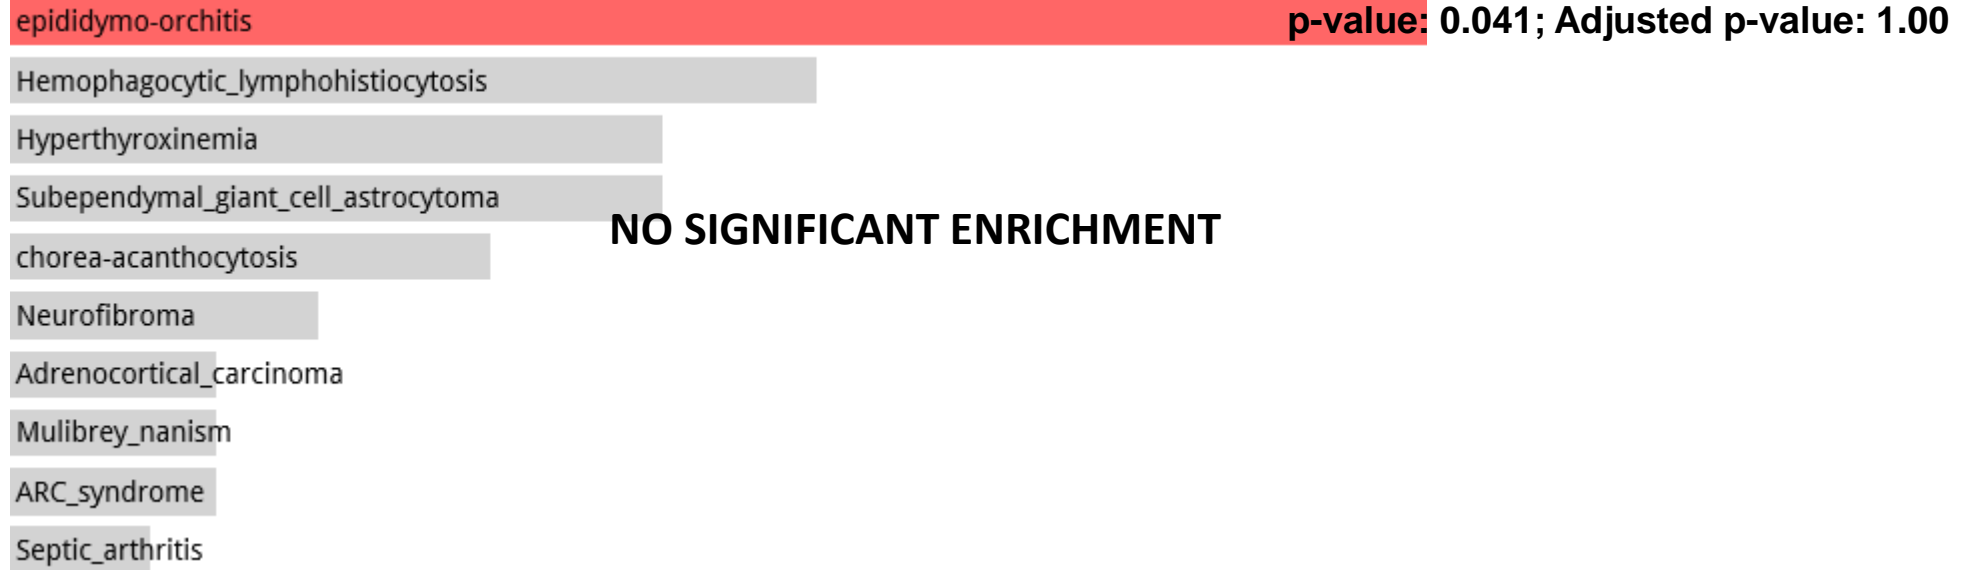

## Disease Perturbations from GEO up random 2847 genes

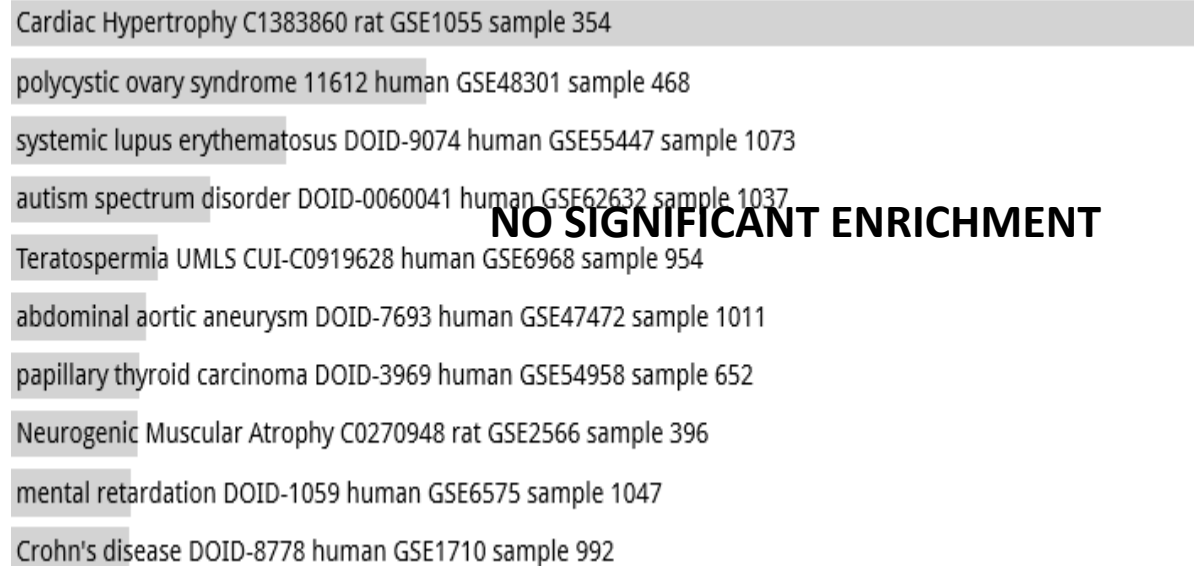

## Disease Perturbations from GEO down random 2847 genes

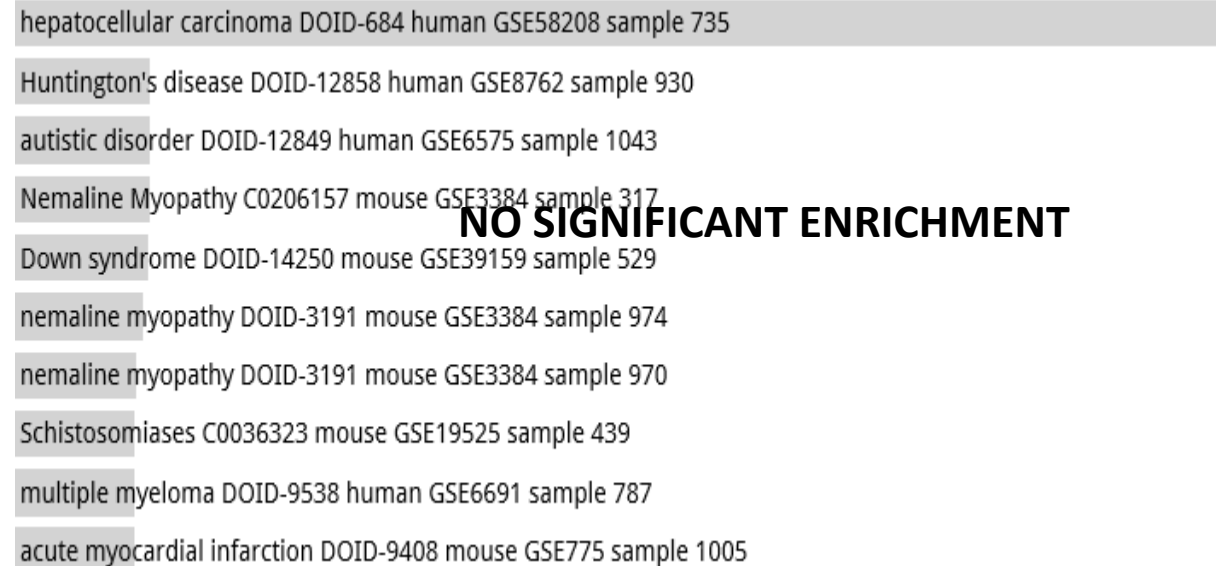



## Random Set 21

### Allen Brain Atlas up random 2847 genes

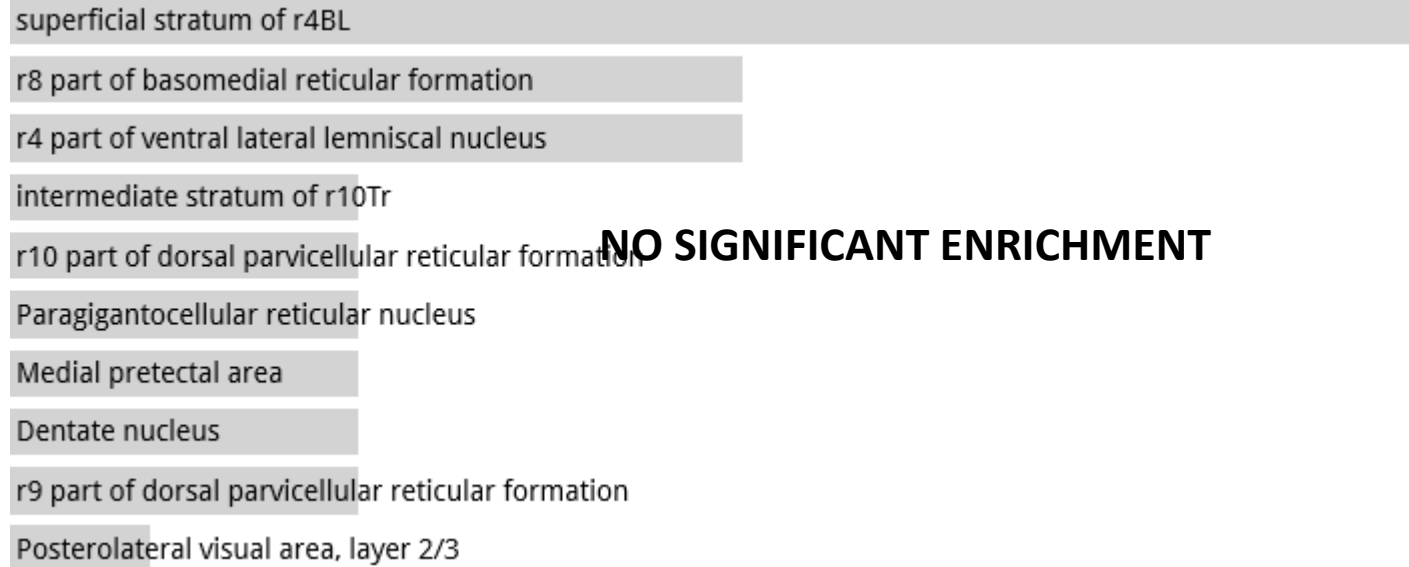

### GO Biological Process 2017b 2847 genes

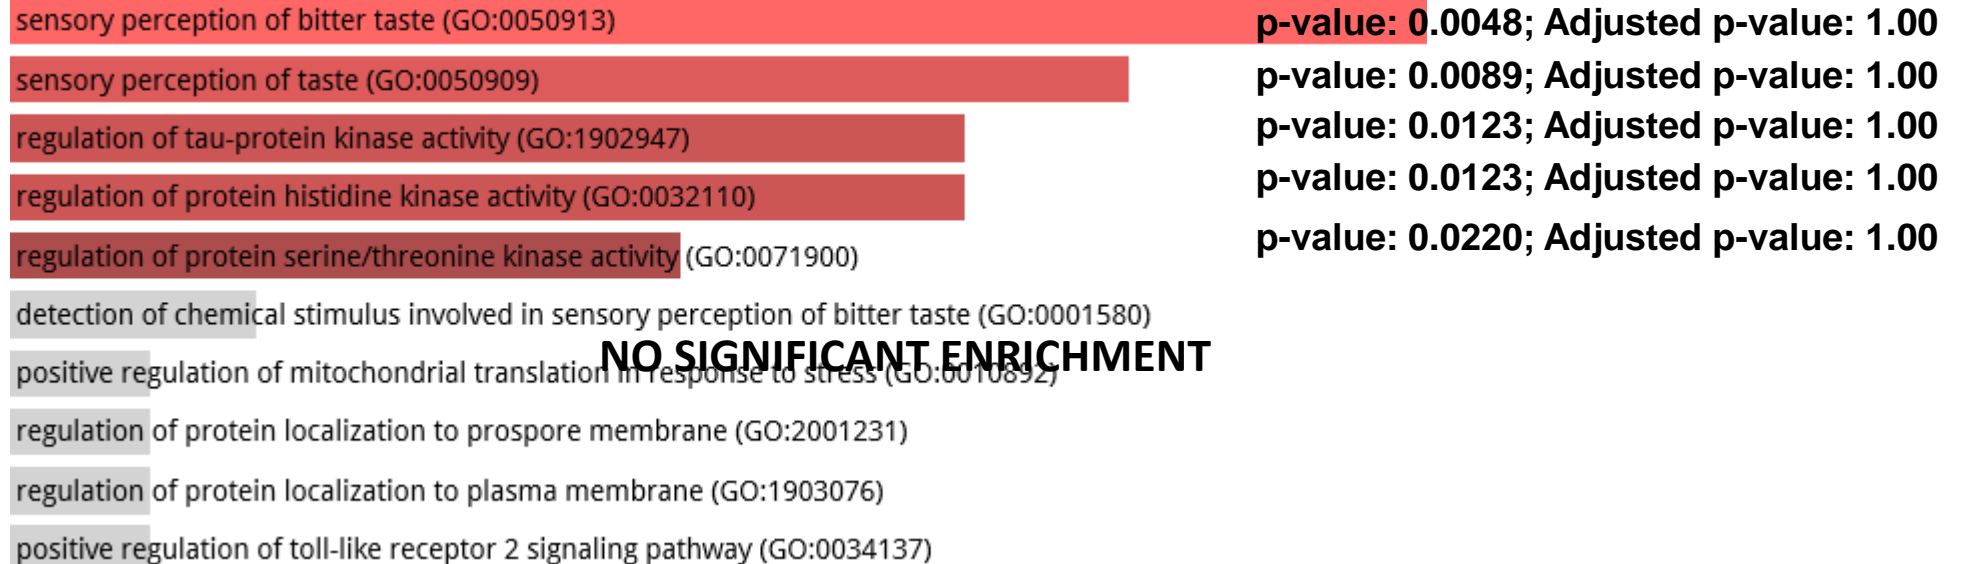

## Random Set 21

## GO Molecular Function 2017 2847 genes

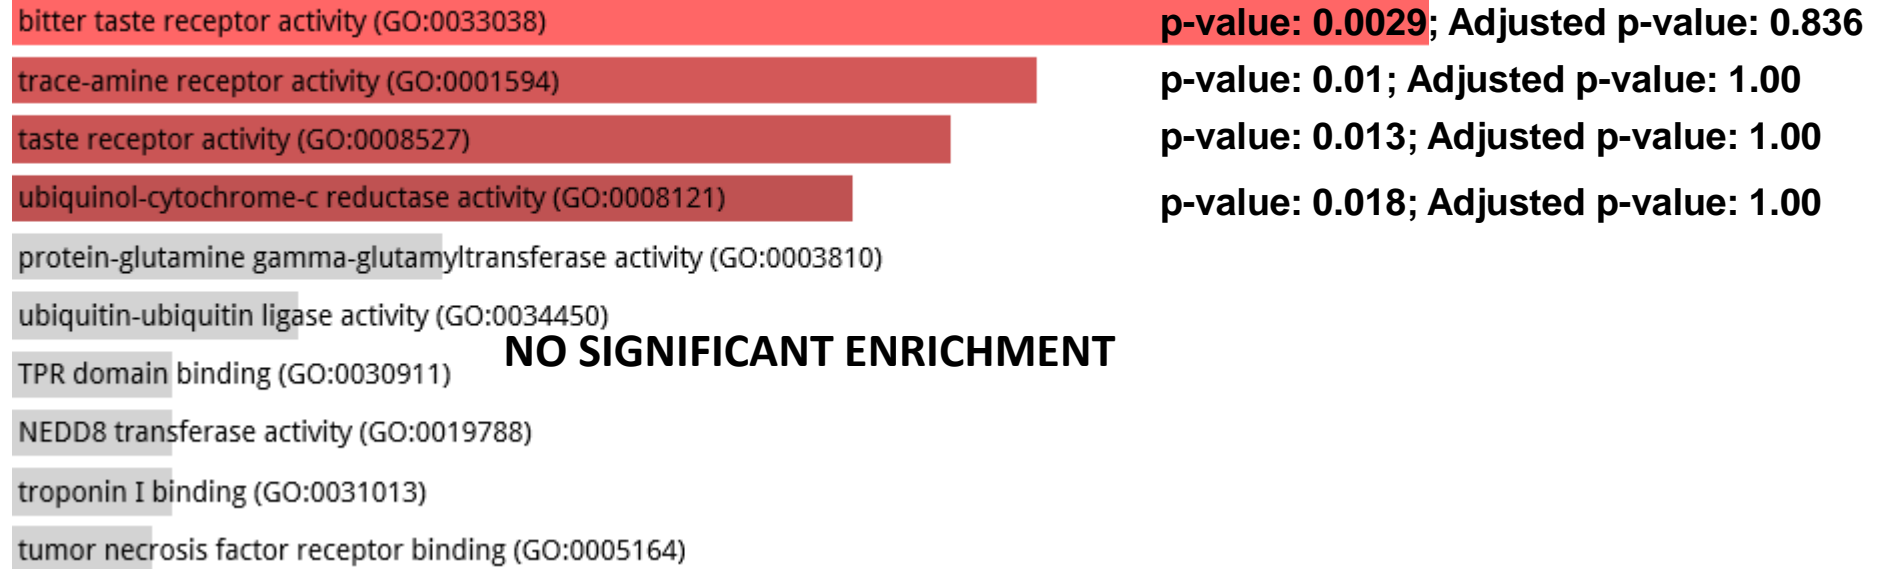

## Pfam InterPro Domains 2847 genes

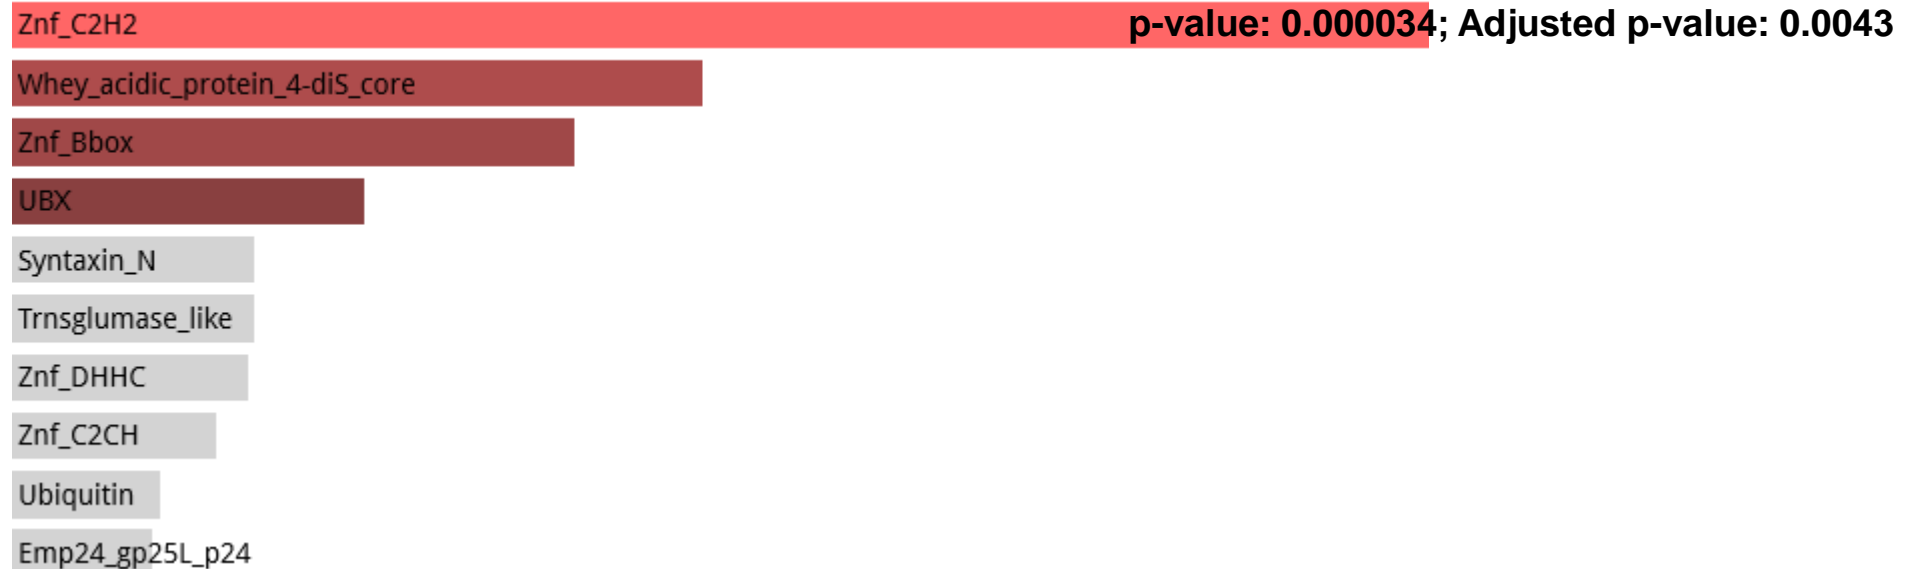

## Random Set 21

## GWAS Catalog 2019 2847 genes

|                                                                |                                          |
|----------------------------------------------------------------|------------------------------------------|
| Alcoholic chronic pancreatitis                                 | p-value: 0.00049; Adjusted p-value: 0.31 |
| Plasminogen activator inhibitor type 1 levels (PAI-1)          |                                          |
| Total bilirubin levels in HIV-1 infection                      |                                          |
| Cerebellum growth                                              |                                          |
| Response to simvastatin treatment (PCSK9 protein level change) |                                          |
| <b>NO SIGNIFICANT ENRICHMENT</b>                               |                                          |
| Pancreatic ductal adenocarcinoma                               |                                          |
| Hepcidin/transferrin saturation ratio                          |                                          |
| Renal function-related traits (sCR)                            |                                          |
| Proteinuria and chronic kidney disease                         |                                          |
| Coffee consumption (cups per day)                              |                                          |

## GO Biological Process 2018 2847 genes

|                                                                                                                    |                                            |
|--------------------------------------------------------------------------------------------------------------------|--------------------------------------------|
| bitter taste receptor activity (GO:0033038)                                                                        | p-value: 0.00047; Adjusted p-value: 0.1939 |
| taste receptor activity (GO:0008527)                                                                               | p-value: 0.0034; Adjusted p-value: 0.7151  |
| trace-amine receptor activity (GO:0001594)                                                                         | p-value: 0.018; Adjusted p-value: 1.00     |
| oxidoreductase activity, acting on diphenols and related substances as donors, cytochrome as acceptor (GO:0004711) | p-value: 0.028; Adjusted p-value: 1.00     |
| ubiquinol-cytochrome-c reductase activity (GO:0008121)                                                             | p-value: 0.028; Adjusted p-value: 1.00     |
| <b>NO SIGNIFICANT ENRICHMENT</b>                                                                                   |                                            |
| uridylyltransferase activity (GO:0070569)                                                                          |                                            |
| protein-glutamine gamma-glutamyltransferase activity (GO:0003810)                                                  |                                            |
| ubiquitin-ubiquitin ligase activity (GO:0034450)                                                                   |                                            |
| MHC protein binding (GO:0042287)                                                                                   |                                            |
| small protein activating enzyme activity (GO:0008641)                                                              |                                            |

## Random Set 21

## CORUM 2847 genes

|                                                                            |                                           |
|----------------------------------------------------------------------------|-------------------------------------------|
| Class C Vps complex (VPS11, VPS18, VPS16) (human)                          | p-value: 0.0029; Adjusted p-value: 0.2781 |
| Class C Vps complex (VPS11, VPS18, STX7) (human)                           | p-value: 0.0029; Adjusted p-value: 0.2781 |
| Class C VPS/HOPS complex (human)                                           | p-value: 0.0048; Adjusted p-value: 0.3109 |
| TBP-TAF complex (human)                                                    | p-value: 0.01; Adjusted p-value: 0.3975   |
| TIF-IB complex (mouse)                                                     | p-value: 0.01; Adjusted p-value: 0.3975   |
| TFIID complex (human)                                                      |                                           |
| TFIID complex, B-cell specific (human)                                     |                                           |
| TRAF2-TRADD complex (human)                                                |                                           |
| TSC1-TSC2 complex (human)                                                  |                                           |
| TFTC complex (TATA-binding protein-free TAF-II-containing complex) (human) |                                           |

**NO SIGNIFICANT ENRICHMENT**

## CORUM database of protein complexes identified by mass spectrometry

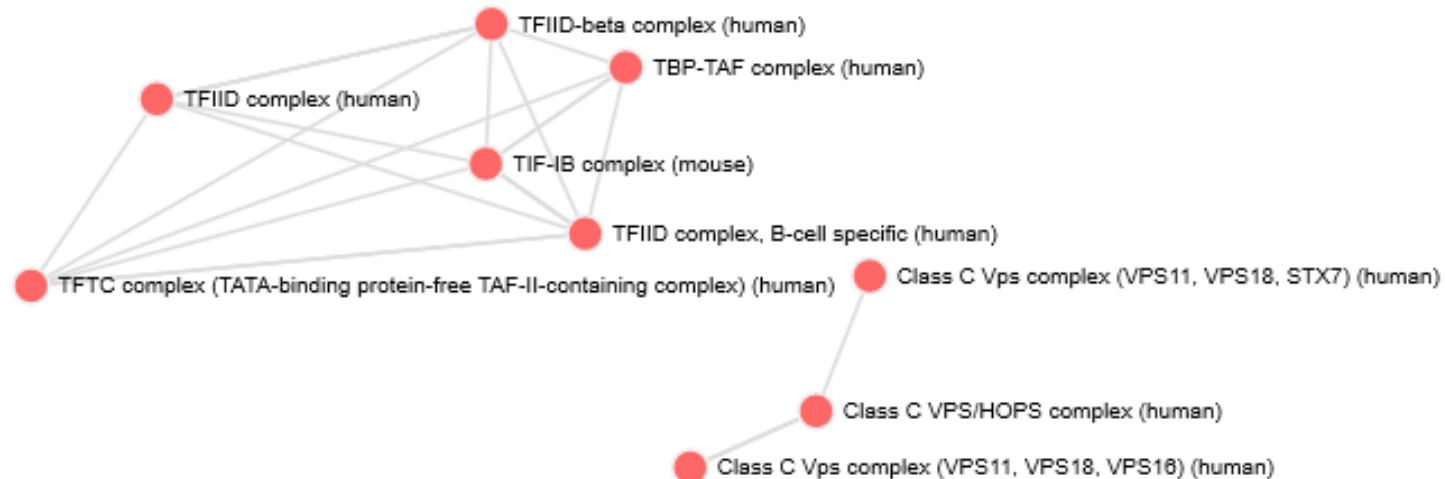

Supplement: 10577_2020_9639_MOESM10_ESM.pdf [file 10577_2020_9639_MOESM10_ESM.pdf]
