# Supplementary material
Source: PubMed Central journal article supplement (PMC7480002)
Supplement: 10577_2020_9639_MOESM1_ESM.pdf [file 10577_2020_9639_MOESM1_ESM.pdf]

**Supplemental Figure S1.** Identification of genes expression of which distinguishes thousands of anatomically distinct areas of the adult human brain, various regions of the central nervous system, and many different cell types and tissues in the human body using the Enrichr bioinformatics platform (see Methods for details).

## ARCHS4 Human Tissues: 8,045 genes

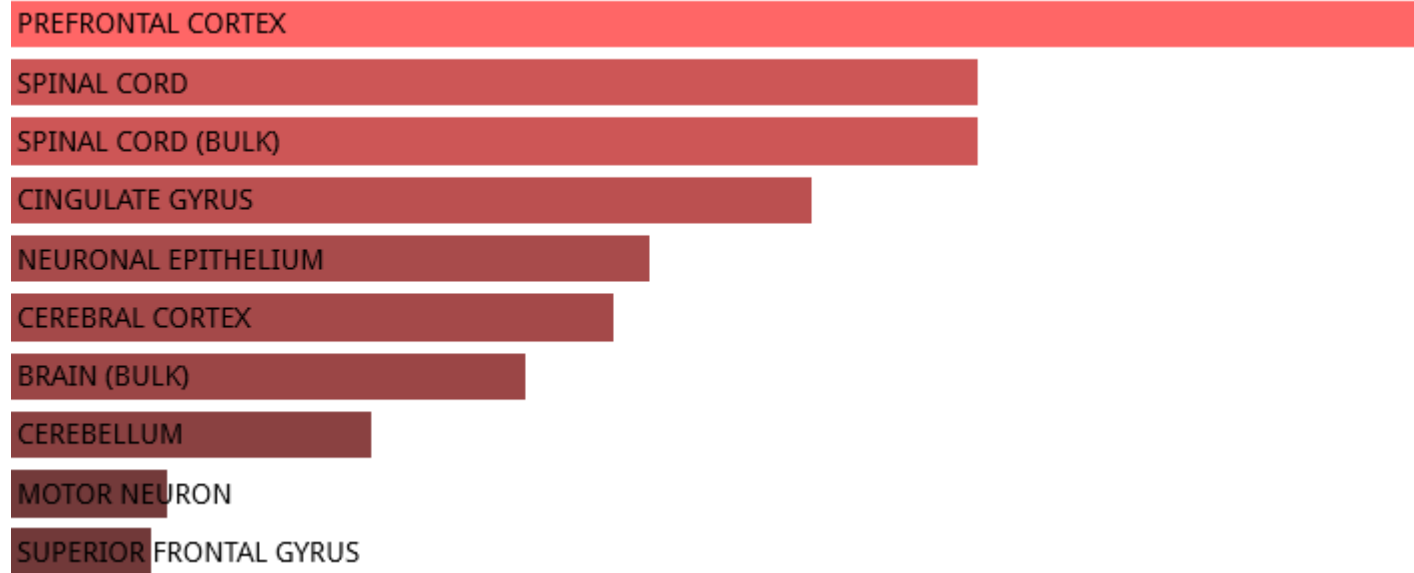

## ARCHS4 Human Tissues: 8,045 genes

### Top 10 of 39 significant records

| Term                   | Overlap   | P-value     | Adjusted P-value |
|------------------------|-----------|-------------|------------------|
| PREFRONTAL CORTEX      | 1348/2316 | 2.06686E-62 | 2.23E-60         |
| SPINAL CORD            | 1299/2316 | 1.17222E-47 | 4.22E-46         |
| SPINAL CORD (BULK)     | 1299/2316 | 1.17222E-47 | 4.22E-46         |
| CINGULATE GYRUS        | 1279/2316 | 3.13703E-42 | 8.47E-41         |
| NEURONAL EPITHELIUM    | 1258/2316 | 6.71385E-37 | 1.45E-35         |
| CEREBRAL CORTEX        | 1253/2316 | 1.09815E-35 | 1.98E-34         |
| BRAIN (BULK)           | 1241/2316 | 7.35673E-33 | 1.14E-31         |
| CEREBELLUM             | 1218/2316 | 8.73598E-28 | 1.18E-26         |
| MOTOR NEURON           | 1184/2316 | 4.19448E-21 | 5.03E-20         |
| SUPERIOR FRONTAL GYRUS | 1181/2316 | 1.4634E-20  | 1.58E-19         |

## Allen Brain Atlas Up: 8,045 genes

Thalamus, sensory-motor cortex related

Thalamus

mantle zone of DTTh

lateral part of alar p2

Ventral posterior complex of the thalamus

Central lateral nucleus of the thalamus

dorsal tier of thalamus

submedius thalamic nucleus

alar plate of p2 (alar thalamus)

Rhomboid nucleus

## Allen Brain Atlas Up: 8,045 genes Networks

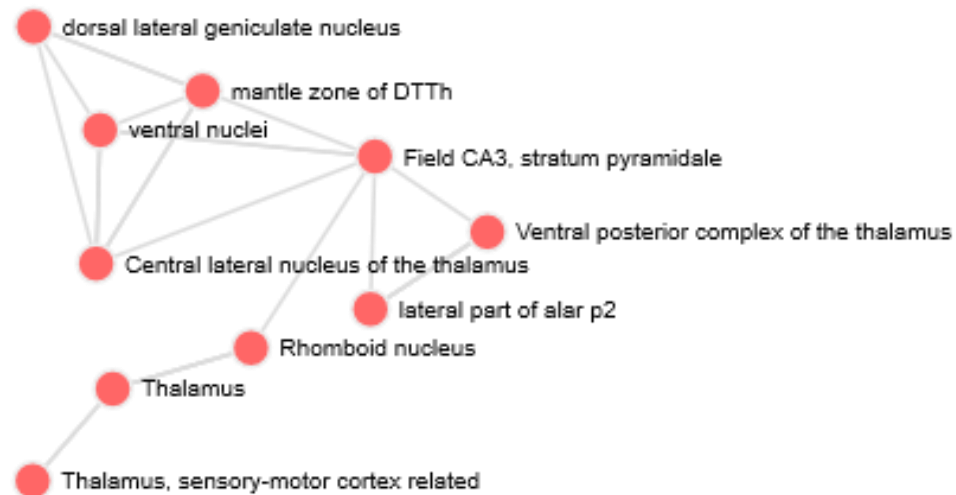

# Allen Brain Atlas Up: 8,045 genes

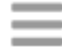

## Enriched Terms

Input Genes

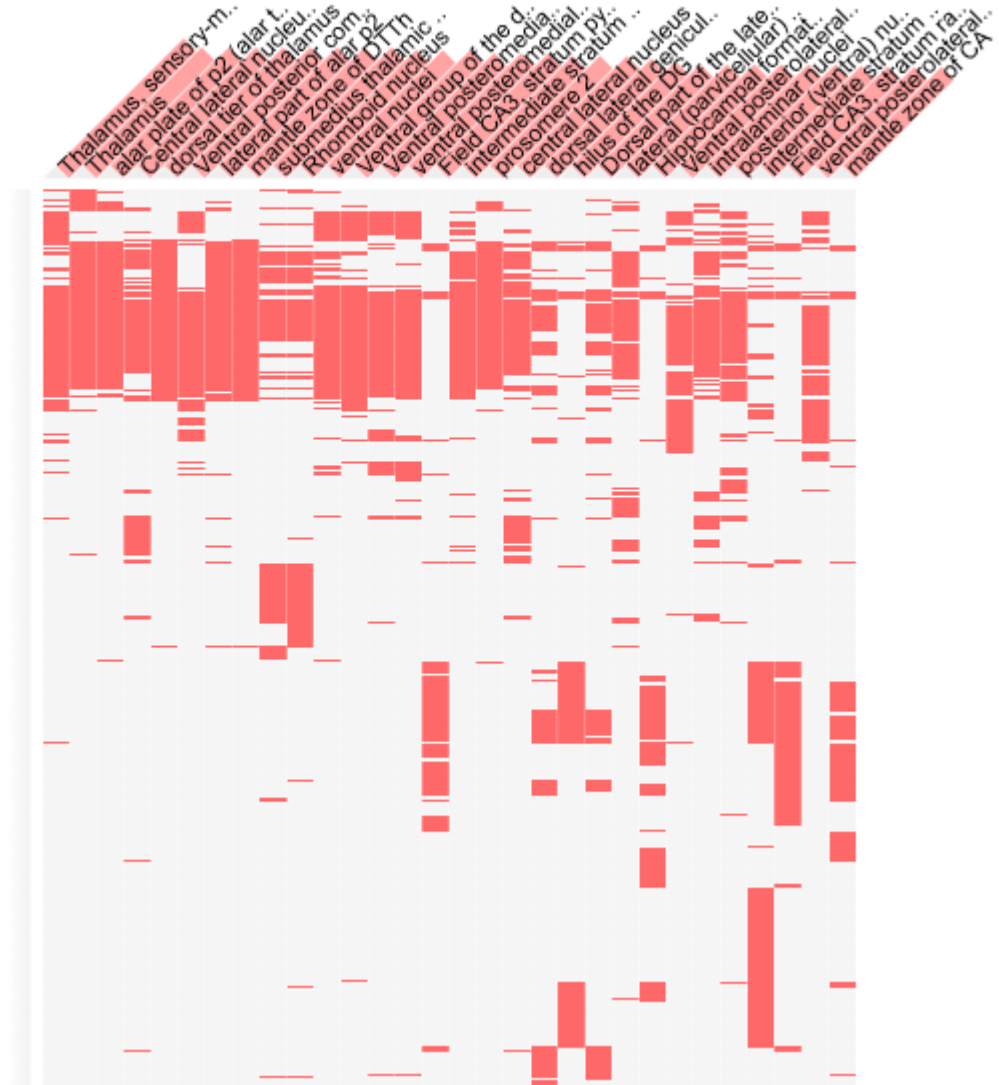

**Allen Brain Atlas Up: 8,045 genes**  
**Top 30 of 1,200 significant records**

| Term                                           | Overlap | P-value  | Adjusted P-value |
|------------------------------------------------|---------|----------|------------------|
| Thalamus, sensory-motor cortex related         | 207/301 | 3.57E-21 | 7.82E-18         |
| Thalamus                                       | 222/334 | 9.71E-20 | 2.42E-17         |
| mantle zone of DTTh                            | 204/301 | 9.94E-20 | 2.42E-17         |
| lateral part of alar p2                        | 204/301 | 9.94E-20 | 2.42E-17         |
| Ventral posterior complex of the thalamus      | 204/301 | 9.94E-20 | 2.42E-17         |
| Central lateral nucleus of the thalamus        | 204/301 | 9.94E-20 | 2.42E-17         |
| alar plate of p2 (alar thalamus)               | 204/301 | 9.94E-20 | 2.42E-17         |
| submedius thalamic nucleus                     | 204/301 | 9.94E-20 | 2.42E-17         |
| dorsal tier of thalamus                        | 204/301 | 9.94E-20 | 2.42E-17         |
| Rhomboid nucleus                               | 227/345 | 2.51E-19 | 5.34E-17         |
| ventral nuclei                                 | 203/301 | 2.92E-19 | 5.34E-17         |
| Ventral group of the dorsal thalamus           | 203/301 | 2.92E-19 | 5.34E-17         |
| Field CA3, stratum pyramidale                  | 202/301 | 8.47E-19 | 1.24E-16         |
| Ventral posteromedial nucleus of the thalamus  | 202/301 | 8.47E-19 | 1.24E-16         |
| ventral posteromedial nucleus                  | 202/301 | 8.47E-19 | 1.24E-16         |
| intermediate stratum of DTTh                   | 201/301 | 2.42E-18 | 2.94E-16         |
| prosomere 2                                    | 201/301 | 2.42E-18 | 2.94E-16         |
| central lateral nucleus                        | 201/301 | 2.42E-18 | 2.94E-16         |
| dorsal lateral geniculate nucleus              | 200/301 | 6.79E-18 | 7.84E-16         |
| hilus of the DG                                | 199/301 | 1.88E-17 | 2.06E-15         |
| lateral (parvicellular) part of MD             | 198/301 | 5.13E-17 | 4.33E-15         |
| Dorsal part of the lateral geniculate complex  | 198/301 | 5.13E-17 | 4.33E-15         |
| Ventral posterolateral nucleus of the thalamus | 198/301 | 5.13E-17 | 4.33E-15         |
| posterior (ventral) nucleus                    | 198/301 | 5.13E-17 | 4.33E-15         |
| Hippocampal formation                          | 198/301 | 5.13E-17 | 4.33E-15         |
| intralaminar nuclei                            | 198/301 | 5.13E-17 | 4.33E-15         |
| intermediate stratum of DG                     | 353/597 | 9.09E-17 | 7.38E-15         |
| Field CA3, stratum radiatum                    | 219/342 | 1.17E-16 | 9.12E-15         |
| mantle zone of CA                              | 197/301 | 1.38E-16 | 9.76E-15         |
| Thalamus, polymodal association cortex related | 197/301 | 1.38E-16 | 9.76E-15         |

## Allen Brain Atlas Down: 8,045 genes

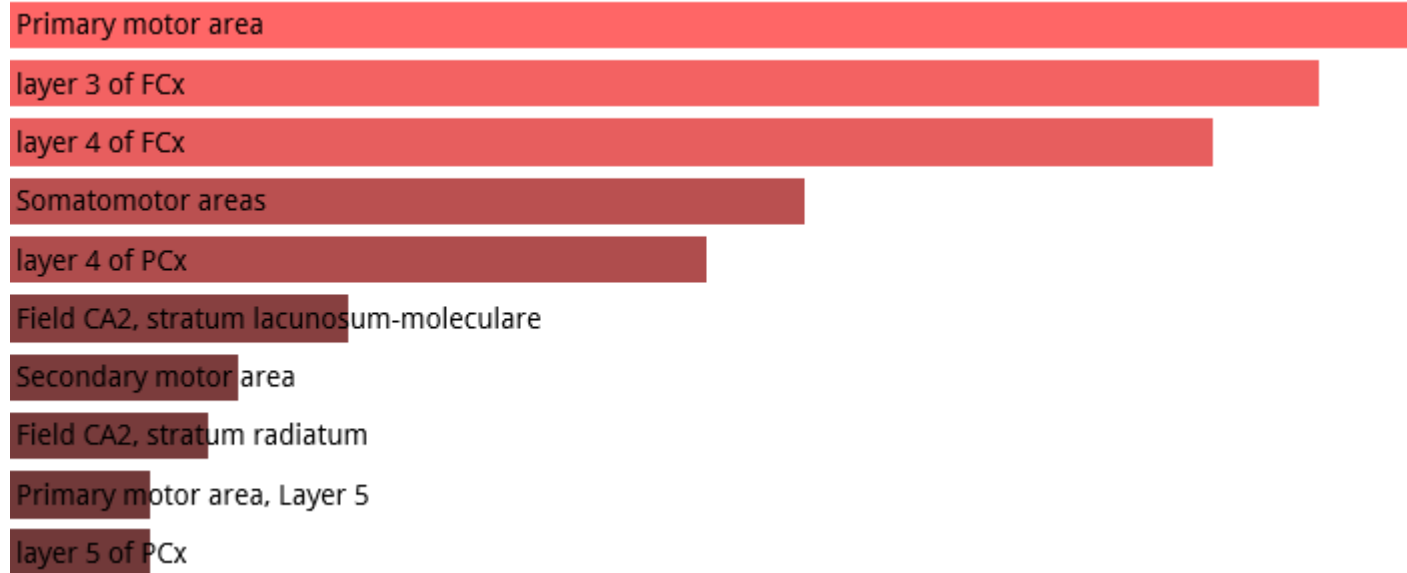

## Allen Brain Atlas Down: 8,045 genes Networks

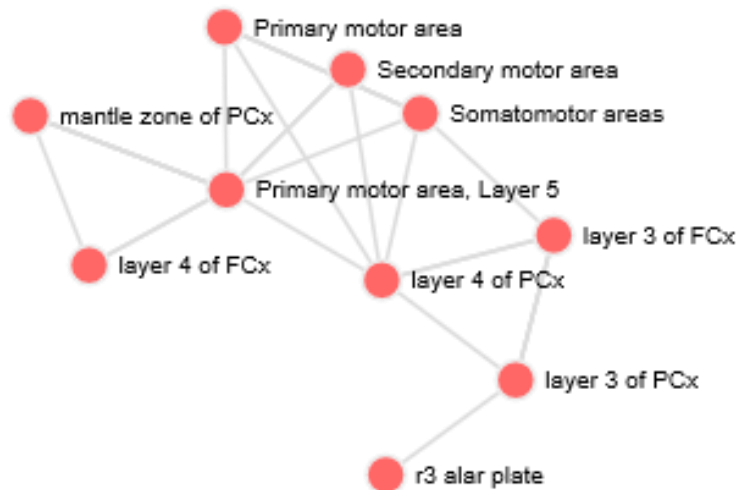

# Allen Brain Atlas Down: 8,045 genes

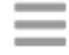

## Enriched Terms

Input Genes

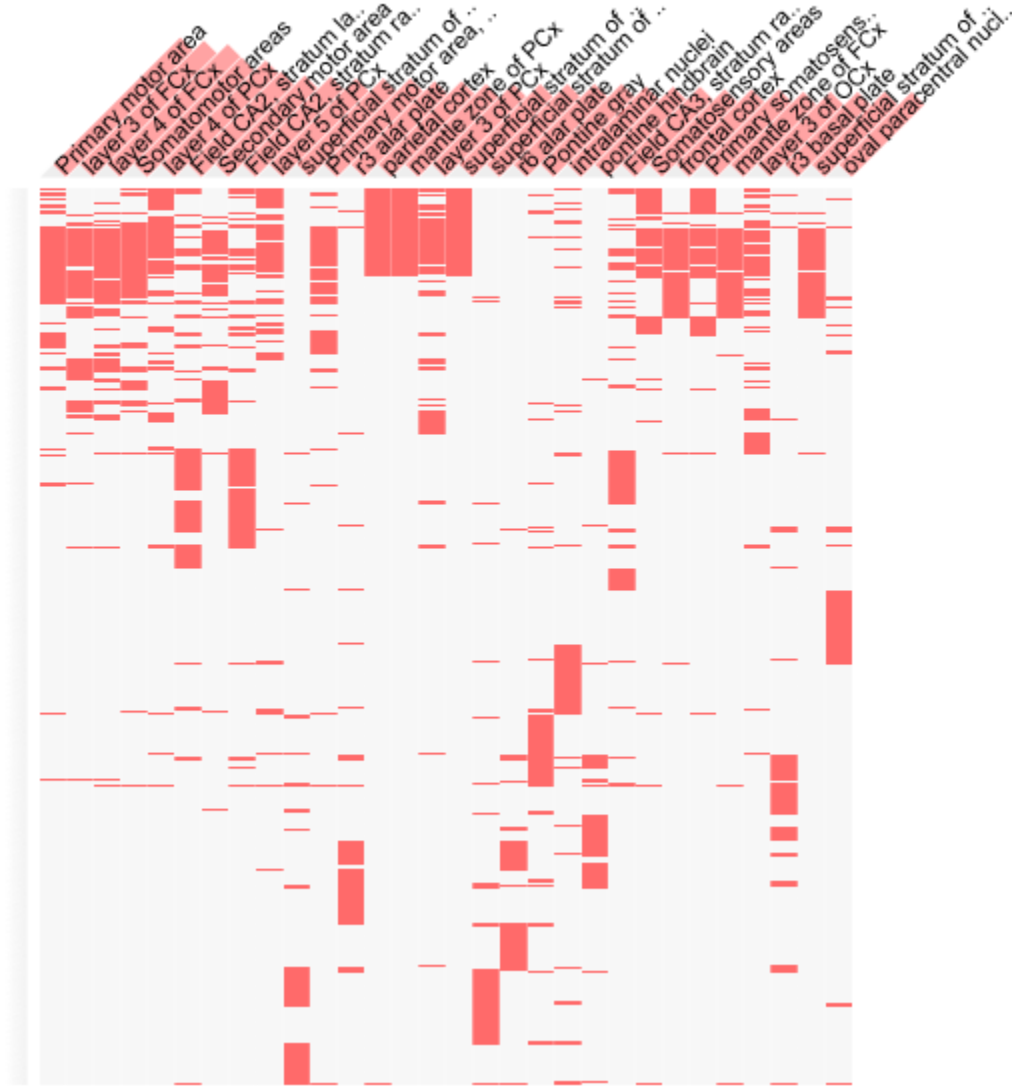

# Allen Brain Atlas Down: 8,045 genes

## Top 31 of 1,062 significant records

| Term                                                      | Overlap | P-value  | Adjusted P-value |
|-----------------------------------------------------------|---------|----------|------------------|
| Primary motor area                                        | 195/300 | 5.73E-16 | 1.26E-12         |
| layer 3 of FCx                                            | 194/300 | 1.49E-15 | 1.63E-12         |
| layer 4 of FCx                                            | 193/300 | 3.81E-15 | 2.79E-12         |
| Somatomotor areas                                         | 189/300 | 1.42E-13 | 7.77E-11         |
| layer 4 of PCx                                            | 188/300 | 3.38E-13 | 1.48E-10         |
| Field CA2, stratum lacunosum-moleculare                   | 248/426 | 8.01E-12 | 2.93E-09         |
| Secondary motor area                                      | 183/300 | 2.1E-11  | 6.57E-09         |
| Field CA2, stratum radiatum                               | 262/458 | 2.75E-11 | 7.54E-09         |
| Primary motor area, Layer 5                               | 182/300 | 4.59E-11 | 9.16E-09         |
| layer 5 of PCx                                            | 182/300 | 4.59E-11 | 9.16E-09         |
| superficial stratum of m1B                                | 182/300 | 4.59E-11 | 9.16E-09         |
| r3 alar plate                                             | 181/300 | 9.92E-11 | 1.67E-08         |
| parietal cortex                                           | 181/300 | 9.92E-11 | 1.67E-08         |
| mantle zone of PCx                                        | 180/300 | 2.11E-10 | 2.44E-08         |
| layer 3 of PCx                                            | 180/300 | 2.11E-10 | 2.44E-08         |
| Pontine gray                                              | 180/300 | 2.11E-10 | 2.44E-08         |
| r6 alar plate                                             | 183/300 | 2.11E-10 | 2.44E-08         |
| superficial stratum of PCx (cortical plate/marginal zone) | 180/300 | 2.11E-10 | 2.44E-08         |
| superficial stratum of p2B                                | 180/300 | 2.11E-10 | 2.44E-08         |
| intralaminar nuclei                                       | 179/300 | 4.44E-10 | 4.64E-08         |
| pontine hindbrain                                         | 182/300 | 4.44E-10 | 4.64E-08         |
| Field CA3, stratum radiatum                               | 211/364 | 4.83E-10 | 4.81E-08         |
| Primary somatosensory area                                | 178/300 | 9.2E-10  | 8.07E-08         |
| frontal cortex                                            | 179/300 | 9.2E-10  | 8.07E-08         |
| Somatosensory areas                                       | 178/300 | 9.2E-10  | 8.07E-08         |
| mantle zone of FCx                                        | 178/300 | 1.88E-09 | 1.37E-07         |
| layer 3 of OCx                                            | 177/300 | 1.88E-09 | 1.37E-07         |
| r3 basal plate                                            | 177/300 | 1.88E-09 | 1.37E-07         |
| superficial stratum of FCx (cortical plate/marginal zone) | 178/300 | 1.88E-09 | 1.37E-07         |
| oval paracentral nucleus                                  | 177/300 | 1.88E-09 | 1.37E-07         |
| Primary motor area, Layer 2/3                             | 176/300 | 3.79E-09 | 2.6E-07          |
