# Supplementary material
Source: PubMed Central journal article supplement (PMC7480002)
Supplement: 10577_2020_9639_MOESM2_ESM.pdf [file 10577_2020_9639_MOESM2_ESM.pdf]

**Supplemental Figure S2.** Identification and characterization of genes expression of which is altered during aging of humans, rats, and mice using the Enrichr bioinformatics platform (see Methods for details).

# Aging Perturbations from GEO up: 8,405 genes

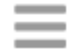

## Enriched Terms

Input Genes

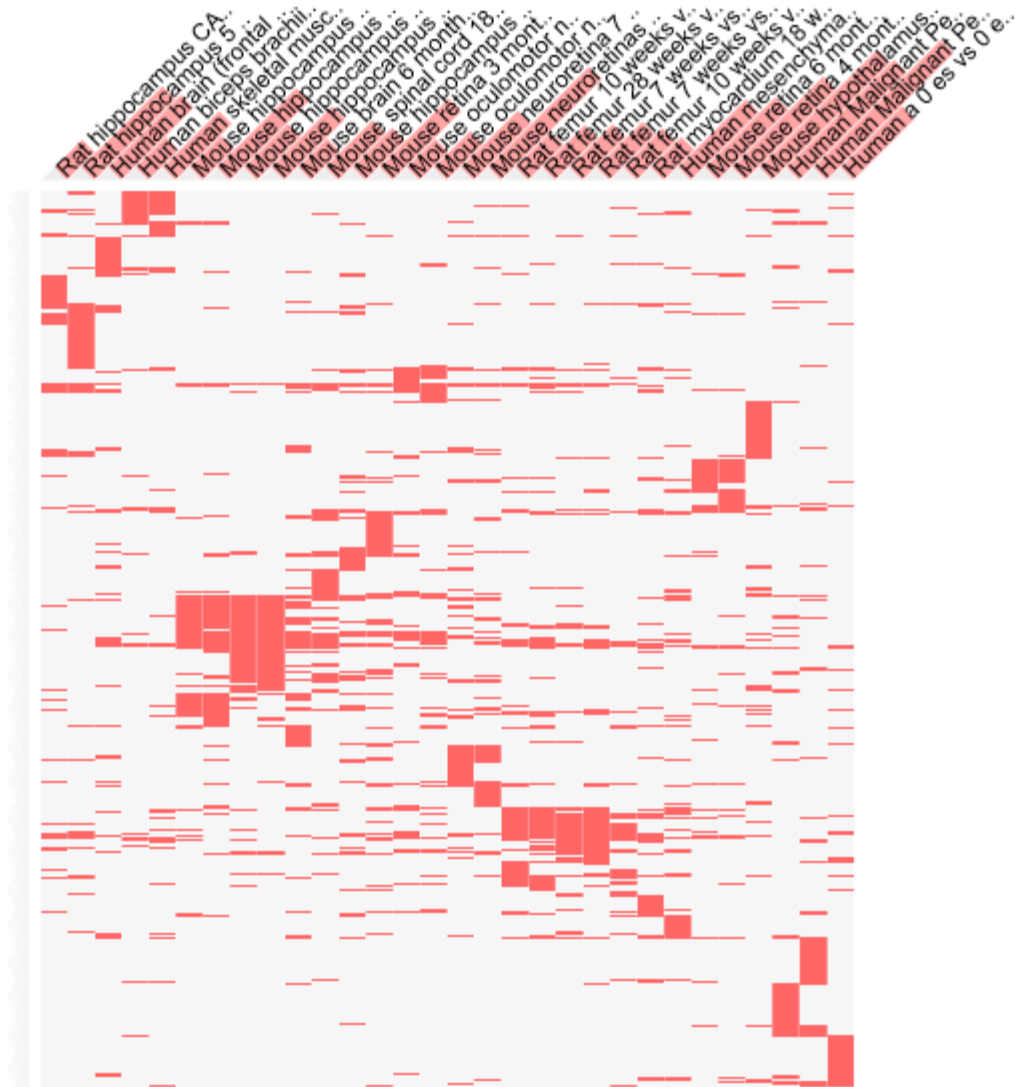

# Aging Perturbations from GEO up: 8,405 genes

## Top 30 significant records

| Term                                                                                    | Overlap | P-value  | Adjusted P-value |
|-----------------------------------------------------------------------------------------|---------|----------|------------------|
| Human_Malignant Peripheral Nerve Sheath Tumour_24 years vs 53 years_GSE17118_aging:364  | 197/337 | 6.9E-10  | 1.97E-07         |
| <a href="#">Mouse_hypothalamus_42 days vs 182 days_GDS3895_aging:107</a>                | 201/349 | 2.59E-09 | 3.7E-07          |
| Human_Malignant Peripheral Nerve Sheath Tumour_27 years vs 61 years_GSE17118_aging:363  | 195/343 | 1.78E-08 | 1.5E-06          |
| Mouse_neuroretinas_7 weeks vs 64 weeks_GSE38671_aging:211                               | 168/289 | 2.1E-08  | 1.5E-06          |
| Mouse_retina_4 months vs 10 months_GSE33674_aging:304                                   | 148/254 | 1.16E-07 | 6.63E-06         |
| <a href="#">Rat_hippocampus_5 months vs 24 months_GSE14505_aging:346</a>                | 230/429 | 6.82E-07 | 3.25E-05         |
| <a href="#">Mouse_hippocampus_9 months vs 20 months_GSE48911_aging:391</a>              | 243/459 | 1.23E-06 | 5.02E-05         |
| Mouse_retina_6 months vs 10 months_GSE33674_aging:305                                   | 125/218 | 3.39E-06 | 0.000121         |
| <a href="#">Human_brain (frontal cortex)_55 years vs 82 years_GSE53890_aging:229</a>    | 171/313 | 4.05E-06 | 0.000129         |
| Mouse_retina_3 months vs 16 months_GDS2654_aging:66                                     | 199/372 | 4.53E-06 | 0.00013          |
| Human_mesenchymal stem cells (from bone marrow)_42 years vs 79 years_GSE35955_aging:293 | 133/238 | 1.03E-05 | 0.000255         |
| Human_a_0 es vs 0 es_GDS5077_aging:106                                                  | 172/319 | 1.07E-05 | 0.000255         |
| <a href="#">Mouse_hippocampus_9 months vs 14 months_GSE48911_aging:390</a>              | 254/494 | 1.28E-05 | 0.000283         |
| Mouse_neuroretina_7 weeks vs 64 weeks_GSE38671_aging:210                                | 171/319 | 1.76E-05 | 0.00036          |
| Human_skeletal muscle_19 years vs 65 years_GDS4858_aging:10                             | 140/259 | 5.77E-05 | 0.0011           |
| Mouse_spinal cord_18 months vs 30 months_GDS1280_aging:1                                | 172/331 | 0.000151 | 0.002697         |
| <a href="#">Mouse_hippocampus_9 months vs 14 months_GSE48911_aging:384</a>              | 246/494 | 0.000252 | 0.004247         |
| Rat_femur_7 weeks vs 53 weeks_GDS509_aging:264                                          | 197/389 | 0.000331 | 0.005257         |
| Rat_femur_28 weeks vs 54 weeks_GDS509_aging:271                                         | 193/383 | 0.000523 | 0.007575         |
| Rat_femur_7 weeks vs 27 weeks_GDS509_aging:258                                          | 155/301 | 0.00053  | 0.007575         |
| <a href="#">Mouse_hippocampus_2 months vs 15 months_GSE5078_aging:398</a>               | 151/293 | 0.000593 | 0.008072         |
| Rat_femur_10 weeks vs 30 weeks_GDS509_aging:260                                         | 123/236 | 0.001057 | 0.013739         |
| Mouse_oculomotor nucleus_6 months vs 30 months_GDS1280_aging:6                          | 140/273 | 0.001185 | 0.01473          |
| Rat_femur_10 weeks vs 56 weeks_GDS509_aging:266                                         | 191/384 | 0.001248 | 0.014873         |
| <a href="#">Mouse_hippocampus_9 months vs 20 months_GSE48911_aging:385</a>              | 216/442 | 0.001959 | 0.022408         |
| Human_biceps brachii muscles_24 years vs 70 years_GDS4858_aging:33                      | 119/233 | 0.003152 | 0.034649         |
| Rat_myocardium_18 weeks vs 22 weeks_GDS4025_aging:142                                   | 124/244 | 0.003271 | 0.034649         |
| <a href="#">Rat_hippocampus CA3 region_6 months vs 25 months_GSE14724_aging:347</a>     | 170/345 | 0.003642 | 0.036658         |
| Mouse_brain_6 months vs 14 months_GSE15129_aging:313                                    | 189/387 | 0.003717 | 0.036658         |
| Mouse_spinal cord_6 months vs 30 months_GDS1280_aging:3                                 | 197/405 | 0.003882 | 0.037008         |

# Aging Perturbations from GEO down: 8,405 genes

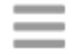

## Enriched Terms

Input Genes

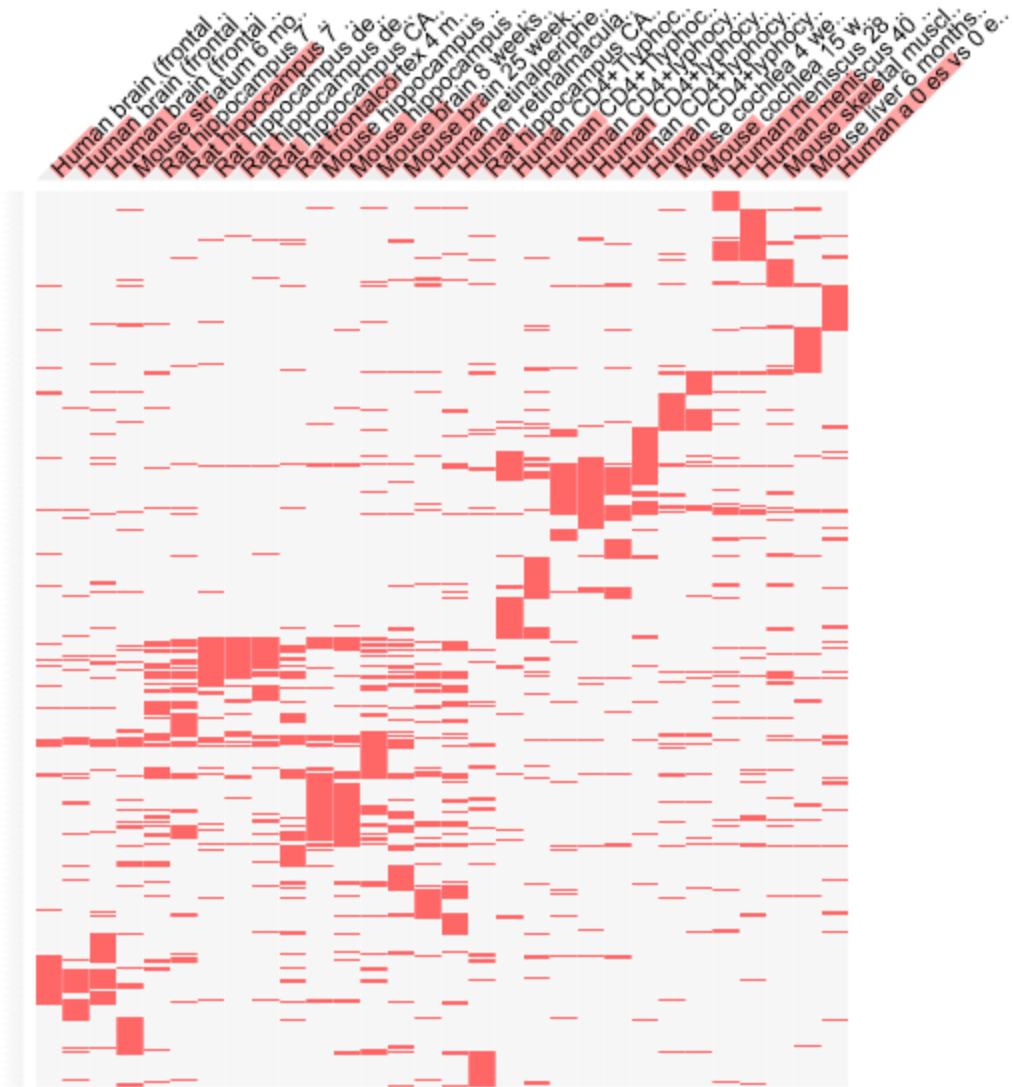

# Aging Perturbations from GEO down: 8,405 genes

## Top 30 significant records

| Term                                                                                    | Overlap                 | P-value                  | Adjusted P-value         |
|-----------------------------------------------------------------------------------------|-------------------------|--------------------------|--------------------------|
| <a href="#">Rat_hippocampus_7 months vs 21 months_GDS4019_aging:98</a>                  | <a href="#">196/314</a> | <a href="#">1.85E-13</a> | <a href="#">5.28E-11</a> |
| Human_a_0 es vs 0 es_GDS5077_aging:106                                                  | 175/281                 | 4.78E-12                 | 6.83E-10                 |
| Human_meniscus_40 years vs 55 years_GSE45233_aging:209                                  | 189/320                 | 4.76E-10                 | 4.54E-08                 |
| <a href="#">Rat_frontal cortex_4 months vs 22 months_GDS3939_aging:99</a>               | <a href="#">192/327</a> | <a href="#">6.86E-10</a> | <a href="#">4.9E-08</a>  |
| Mouse_skeletal muscle precursor_12 months vs 24 months_GDS4892_aging:9                  | 137/224                 | 5.29E-09                 | 3.02E-07                 |
| Mouse_brain_25 weeks vs 100 weeks_GSE41018_aging:400                                    | 178/311                 | 3.83E-08                 | 1.68E-06                 |
| Mouse_striatum_6 months vs 21 months_GDS4153_aging:78                                   | 164/283                 | 4.12E-08                 | 1.68E-06                 |
| Human_meniscus_28 years vs 47 years_GSE45233_aging:208                                  | 165/286                 | 5.7E-08                  | 2.04E-06                 |
| Mouse_brain_8 weeks vs 104 weeks_GSE20411_aging:311                                     | 224/408                 | 8.36E-08                 | 2.66E-06                 |
| <a href="#">Human_brain (frontal cortex)_28 years vs 100 years_GSE53890_aging:228</a>   | <a href="#">197/356</a> | <a href="#">2.32E-07</a> | <a href="#">6.64E-06</a> |
| Human_CD4+Tlyphocytes_61 years vs 81 years_GSE62373_aging:185                           | 193/349                 | 3.26E-07                 | 8.48E-06                 |
| Human_CD4+lyphocytes_40 years vs 72 years_GSE62373_aging:163                            | 203/373                 | 7.65E-07                 | 1.82E-05                 |
| <a href="#">Mouse_hippocampus_4 months vs 9 months_GSE48911_aging:387</a>               | <a href="#">230/430</a> | <a href="#">8.6E-07</a>  | <a href="#">1.89E-05</a> |
| <a href="#">Rat_hippocampus_7 months vs 21 months_GDS4019_aging:97</a>                  | <a href="#">156/277</a> | <a href="#">9.99E-07</a> | <a href="#">2.04E-05</a> |
| Mouse_cochlea_15 weeks vs 45 weeks_GSE35234_aging:164                                   | 142/250                 | 1.58E-06                 | 3.01E-05                 |
| <a href="#">Human_brain (frontal cortex)_55 years vs 82 years_GSE53890_aging:229</a>    | <a href="#">159/287</a> | <a href="#">2.97E-06</a> | <a href="#">5.31E-05</a> |
| Human_retinalmacula_18 years vs 74 years_GSE32614_aging:150                             | 182/336                 | 4.14E-06                 | 6.96E-05                 |
| <a href="#">Mouse_hippocampus_4 months vs 9 months_GSE48911_aging:381</a>               | <a href="#">226/429</a> | <a href="#">4.52E-06</a> | <a href="#">7.18E-05</a> |
| Human_CD4+lyphocytes_40 years vs 61 years_GSE62373_aging:160                            | 192/358                 | 5.34E-06                 | 7.77E-05                 |
| Human_CD4+Tlyphocytes_29 years vs 81 years_GSE62373_aging:176                           | 201/377                 | 5.44E-06                 | 7.77E-05                 |
| Human_CD4+lyphocytes_29 years vs 61 years_GSE62373_aging:154                            | 184/342                 | 6.43E-06                 | 8.75E-05                 |
| Human_retinalperiphery_32 years vs 74 years_GSE32614_aging:151                          | 160/293                 | 8.42E-06                 | 0.000109                 |
| <a href="#">Human_brain (frontal cortex)_28 years vs 82 years_GSE53890_aging:227</a>    | <a href="#">154/281</a> | <a href="#">9.47E-06</a> | <a href="#">0.000118</a> |
| <a href="#">Rat_hippocampus CA3 region_6 months vs 25 months_GSE14724_aging:347</a>     | <a href="#">141/255</a> | <a href="#">1.2E-05</a>  | <a href="#">0.000143</a> |
| Mouse_cochlea_4 weeks vs 45 weeks_GSE35234_aging:161                                    | 145/268                 | 4.04E-05                 | 0.000463                 |
| <a href="#">Rat_hippocampus dentate gyrus_18 months vs 28 months_GSE21681_aging:357</a> | <a href="#">124/225</a> | <a href="#">4.78E-05</a> | <a href="#">0.000522</a> |
| <a href="#">Rat_hippocampus dentate gyrus_18 months vs 28 months_GSE21681_aging:358</a> | <a href="#">147/273</a> | <a href="#">4.93E-05</a> | <a href="#">0.000522</a> |
| Human_CD4+lyphocytes_40 years vs 81 years_GSE62373_aging:165                            | 197/380                 | 6.24E-05                 | 0.000638                 |
| Human_CD4+lyphocytes_29 years vs 81 years_GSE62373_aging:156                            | 215/419                 | 6.73E-05                 | 0.000664                 |
| <a href="#">Rat_hippocampus CA1_18 months vs 28 months_GSE21681_aging:353</a>           | <a href="#">144/270</a> | <a href="#">0.000107</a> | <a href="#">0.001004</a> |
