# Supplementary material
Source: PubMed Central journal article supplement (PMC7480002)
Supplement: 10577_2020_9639_MOESM3_ESM.pdf [file 10577_2020_9639_MOESM3_ESM.pdf]

**Supplemental Figure S3.** Identification of genes

implicated in development and manifestations of hundreds  
physiological and pathological phenotypes and autosomal  
inheritance in Modern Humans using the Enrichr  
bioinformatics platform (see Methods for details).

# Human Phenotype Ontology: 8,405 genes

Autosomal dominant inheritance (HP:0000006)

Downslanted palpebral fissures (HP:0000494)

Cryptorchidism (HP:0000028)

Autosomal recessive inheritance (HP:0000007)

Hypertelorism (HP:0000316)

Radial deviation of finger (HP:0009466)

Brachydactyly syndrome (HP:0001156)

Clinodactyly of the 5th finger (HP:0004209)

Frontal bossing (HP:0002007)

Low-set, posteriorly rotated ears (HP:0000368)

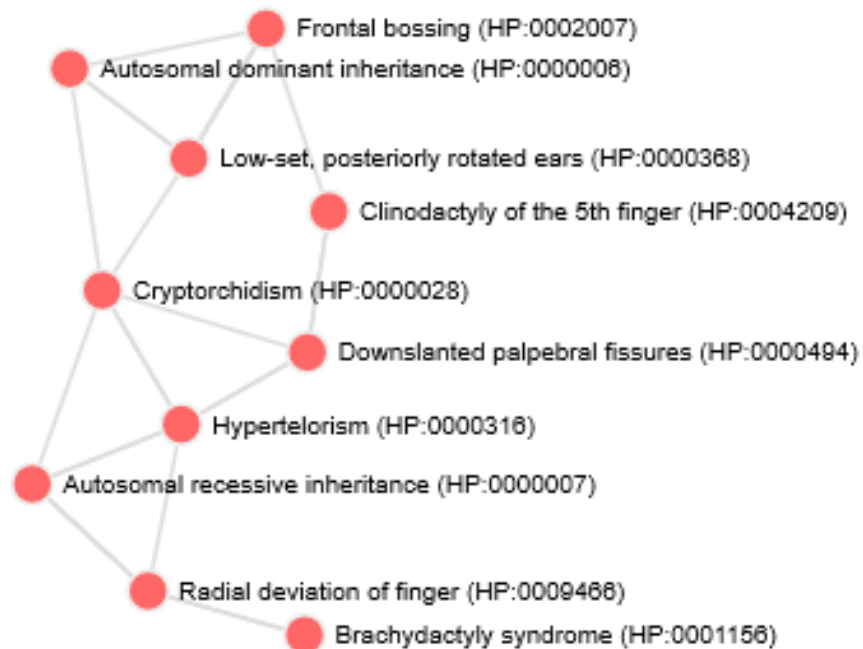

# Human Phenotype Ontology: 8,405 genes

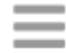

## Enriched Terms

Input Genes

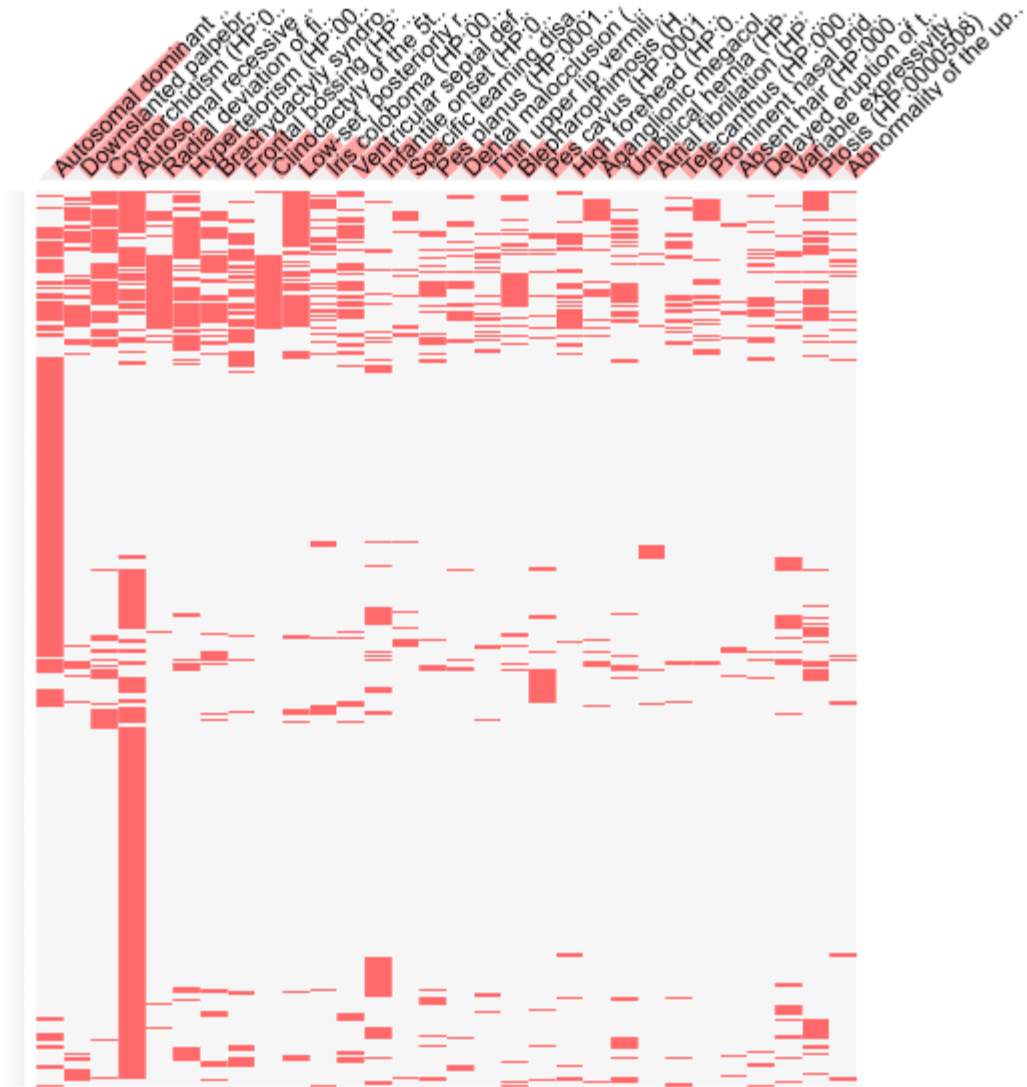

# Human Phenotype Ontology (8,405 genes): Top 35 of 298 significant records

| Term                                                | Overlap         | P-value         | Adjusted P-value |
|-----------------------------------------------------|-----------------|-----------------|------------------|
| <b>Autosomal dominant inheritance (HP:0000006)</b>  | <b>645/1134</b> | <b>2.85E-25</b> | <b>5.07E-22</b>  |
| Downslanted palpebral fissures (HP:0000494)         | 127/188         | 1.17E-12        | 1.04E-09         |
| Cryptorchidism (HP:0000028)                         | 222/379         | 4.46E-11        | 2.64E-08         |
| <b>Autosomal recessive inheritance (HP:0000007)</b> | <b>849/1722</b> | <b>1.14E-10</b> | <b>5.07E-08</b>  |
| Radial deviation of finger (HP:0009466)             | 140/229         | 3.75E-09        | 1.11E-06         |
| Hypertelorism (HP:0000316)                          | 190/328         | 3.76E-09        | 1.11E-06         |
| Brachydactyly syndrome (HP:0001156)                 | 119/192         | 1.77E-08        | 4.5E-06          |
| Frontal bossing (HP:0002007)                        | 129/213         | 3.38E-08        | 7.51E-06         |
| Clinodactyly of the 5th finger (HP:0004209)         | 118/192         | 4.03E-08        | 7.96E-06         |
| Low-set, posteriorly rotated ears (HP:0000368)      | 158/276         | 2.14E-07        | 3.8E-05          |
| Iris coloboma (HP:0000612)                          | 72/110          | 5.77E-07        | 9.34E-05         |
| Ventricular septal defect (HP:0001629)              | 106/176         | 7.99E-07        | 0.000113         |
| Infantile onset (HP:0003593)                        | 145/254         | 8.28E-07        | 0.000113         |
| Specific learning disability (HP:0001328)           | 36/47           | 1.49E-06        | 0.000189         |
| Pes planus (HP:0001763)                             | 68/105          | 2.09E-06        | 0.000246         |
| Dental malocclusion (HP:0000689)                    | 55/81           | 2.21E-06        | 0.000246         |
| Thin upper lip vermilion (HP:0000219)               | 38/51           | 2.5E-06         | 0.000261         |
| Blepharophimosis (HP:0000581)                       | 67/104          | 3.26E-06        | 0.000323         |
| Pes cavus (HP:0001761)                              | 80/129          | 3.55E-06        | 0.000323         |
| High forehead (HP:0000348)                          | 69/108          | 3.63E-06        | 0.000323         |
| Aganglionic megacolon (HP:0002251)                  | 63/97           | 4.26E-06        | 0.000361         |
| Umbilical hernia (HP:0001537)                       | 91/151          | 4.5E-06         | 0.000364         |
| Atrial fibrillation (HP:0005110)                    | 26/32           | 6.52E-06        | 0.000505         |
| Telecanthus (HP:0000506)                            | 55/83           | 6.96E-06        | 0.000516         |
| Prominent nasal bridge (HP:0000426)                 | 64/100          | 7.43E-06        | 0.000529         |
| Absent hair (HP:0002298)                            | 18/20           | 1.14E-05        | 0.000781         |
| Delayed eruption of teeth (HP:0000684)              | 56/86           | 1.28E-05        | 0.000841         |
| Variable expressivity (HP:0003828)                  | 86/144          | 1.34E-05        | 0.00085          |
| Ptosis (HP:0000508)                                 | 180/338         | 1.79E-05        | 0.001074         |
| Abnormality of the upper arm (HP:0001454)           | 29/38           | 1.81E-05        | 0.001074         |
| Progressive disorder (HP:0003676)                   | 86/145          | 1.94E-05        | 0.001103         |
| Depressed nasal bridge (HP:0005280)                 | 127/228         | 1.99E-05        | 0.001103         |
| Sporadic (HP:0003745)                               | 42/61           | 2.05E-05        | 0.001103         |
| Left ventricular hypertrophy (HP:0001712)           | 31/42           | 2.93E-05        | 0.0015           |
| Postaxial hand polydactyly (HP:0001162)             | 53/82           | 2.95E-05        | 0.0015           |

# Database of Human Genotypes and Phenotypes (dbGaP): 8,405 genes

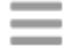

## Enriched Terms

Input Genes

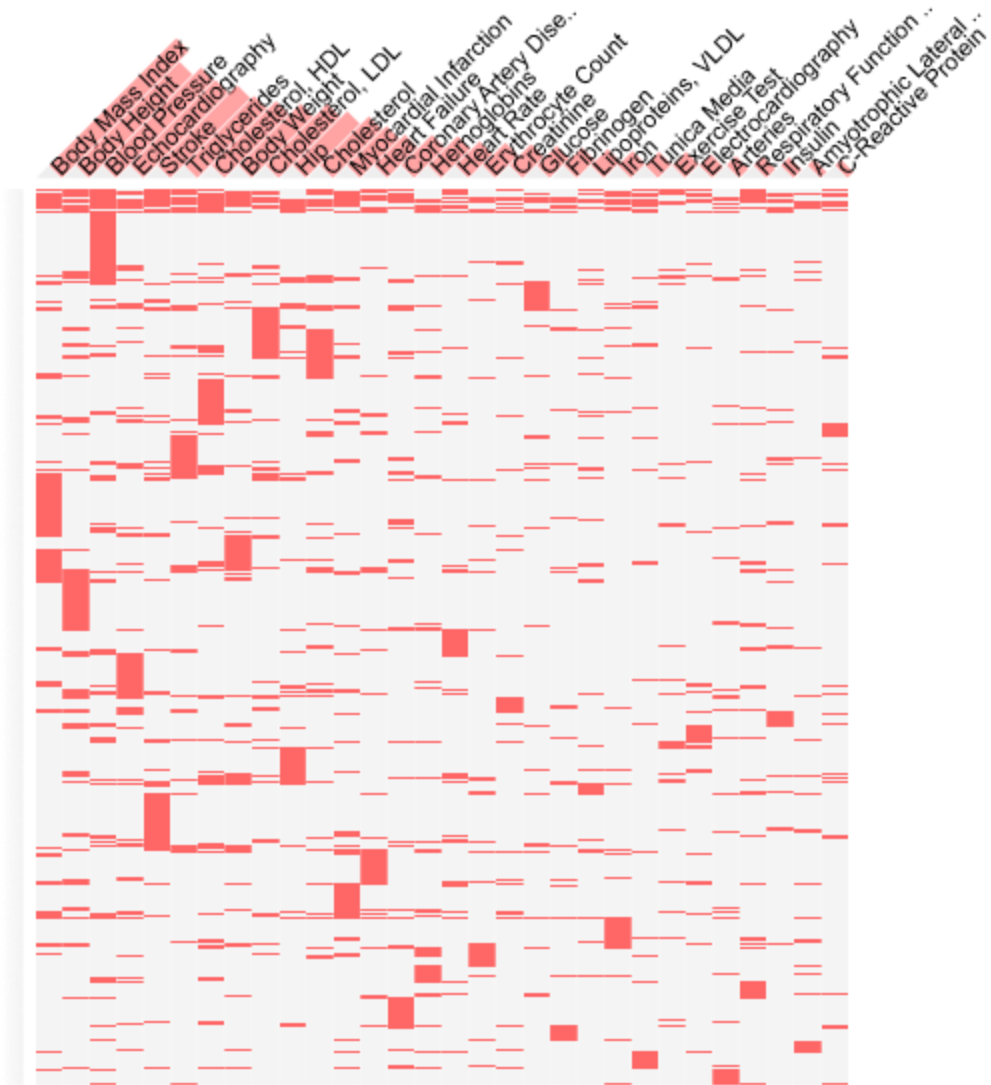

**Database of Human Genotypes and Phenotypes (dbGaP): 8,405 genes**  
**Top 20 of 136 significant records**

| Term                    | Overlap | P-value  | Adjusted P-value |
|-------------------------|---------|----------|------------------|
| Body Mass Index         | 313/437 | 1.02E-36 | 3.46E-34         |
| Body Height             | 276/385 | 1.32E-32 | 2.23E-30         |
| Blood Pressure          | 310/454 | 3.19E-30 | 3.59E-28         |
| Echocardiography        | 204/273 | 2.47E-28 | 2.08E-26         |
| Stroke                  | 211/289 | 6.02E-27 | 4.07E-25         |
| Triglycerides           | 180/244 | 4.77E-24 | 2.68E-22         |
| Cholesterol, HDL        | 242/357 | 3.57E-23 | 1.72E-21         |
| Body Weight             | 161/216 | 1.91E-22 | 8.05E-21         |
| Cholesterol, LDL        | 210/304 | 7.78E-22 | 2.92E-20         |
| Hip                     | 151/202 | 2.39E-21 | 8.06E-20         |
| Cholesterol             | 183/268 | 2.28E-18 | 7.02E-17         |
| Myocardial Infarction   | 157/229 | 3.32E-16 | 9.36E-15         |
| Coronary Artery Disease | 140/205 | 2.16E-14 | 5.31E-13         |
| Heart Failure           | 130/187 | 2.2E-14  | 5.31E-13         |
| Hemoglobins             | 113/157 | 2.38E-14 | 5.37E-13         |
| Erythrocyte Count       | 87/115  | 2.09E-13 | 4.41E-12         |
| Heart Rate              | 110/155 | 2.47E-13 | 4.86E-12         |
| Creatinine              | 73/92   | 2.59E-13 | 4.86E-12         |
| Fibrinogen              | 69/86   | 4.29E-13 | 7.05E-12         |
| Lipoproteins, VLDL      | 69/86   | 4.29E-13 | 7.05E-12         |

# GWAS Catalog 2019: 8,405 genes

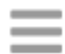

## Enriched Terms

Input Genes

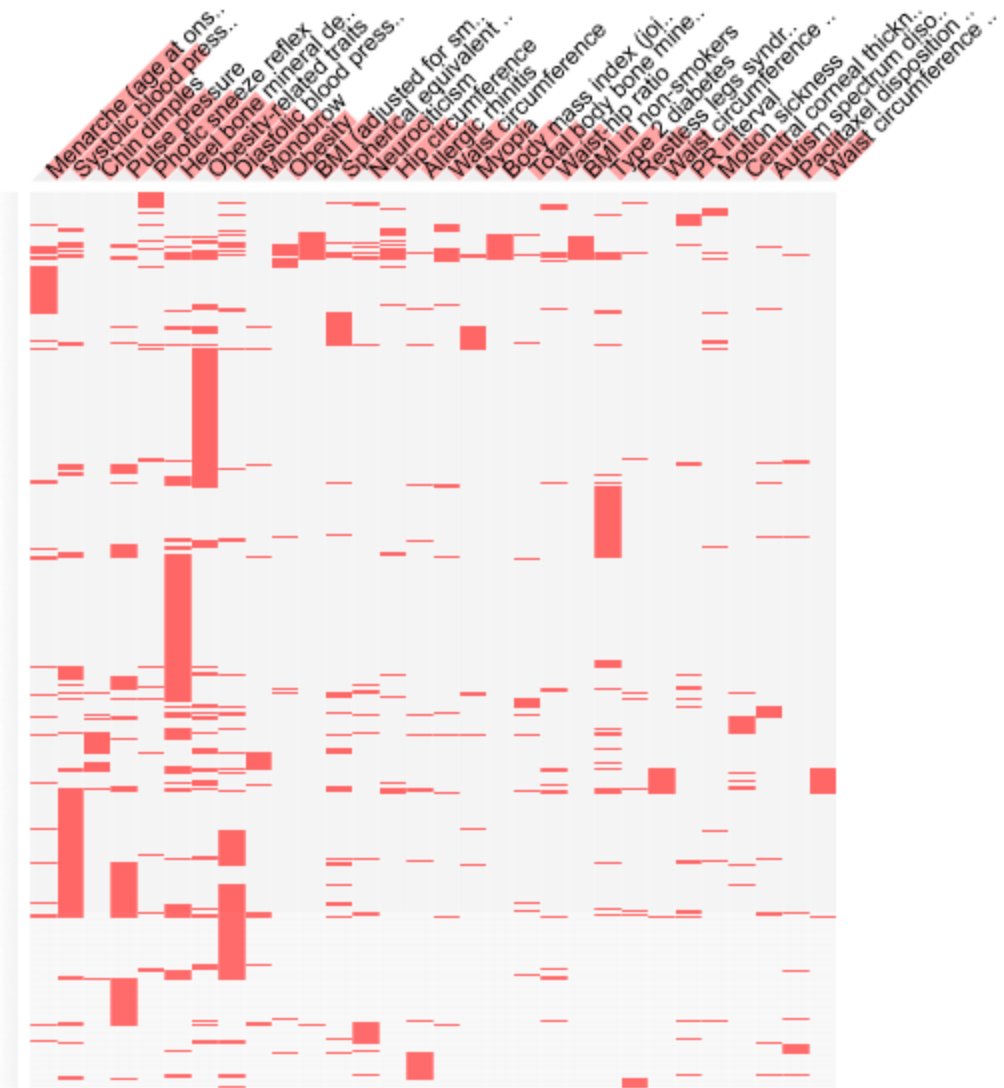

## GWAS Catalog 2019 (8,405 genes): Top 40 of 241 significant records

| Term                                                                                       | Overlap | P-value  | Adjusted P-value |
|--------------------------------------------------------------------------------------------|---------|----------|------------------|
| Menarche (age at onset)                                                                    | 154/212 | 1.12E-19 | 1.4E-16          |
| Systolic blood pressure                                                                    | 389/657 | 1.62E-19 | 1.4E-16          |
| Chin dimples                                                                               | 62/74   | 1.51E-13 | 8.68E-11         |
| Pulse pressure                                                                             | 321/567 | 9.66E-13 | 4.16E-10         |
| Photic sneeze reflex                                                                       | 55/65   | 1.6E-12  | 5.51E-10         |
| Heel bone mineral density                                                                  | 478/898 | 3.09E-12 | 8.88E-10         |
| Obesity-related traits                                                                     | 427/804 | 6.98E-11 | 1.72E-08         |
| Diastolic blood pressure                                                                   | 348/646 | 4.87E-10 | 1.05E-07         |
| Monobrow                                                                                   | 58/76   | 1.19E-09 | 2.28E-07         |
| Obesity                                                                                    | 45/55   | 1.61E-09 | 2.78E-07         |
| Height                                                                                     | 288/527 | 2.32E-09 | 3.63E-07         |
| Atrial fibrillation                                                                        | 146/240 | 2.83E-09 | 3.78E-07         |
| BMI (adjusted for smoking behaviour)                                                       | 58/77   | 2.85E-09 | 3.78E-07         |
| Spherical equivalent or myopia (age of diagnosis)                                          | 120/191 | 4.87E-09 | 5.99E-07         |
| Neuroticism                                                                                | 69/97   | 5.87E-09 | 6.74E-07         |
| Hip circumference                                                                          | 52/69   | 1.83E-08 | 1.97E-06         |
| Diverticular disease                                                                       | 100/156 | 2.04E-08 | 2.06E-06         |
| Allergic rhinitis                                                                          | 77/114  | 3.13E-08 | 3E-06            |
| Waist circumference                                                                        | 55/75   | 3.67E-08 | 3.33E-06         |
| Myopia                                                                                     | 52/70   | 4.2E-08  | 3.62E-06         |
| Body mass index (joint analysis main effects and smoking interaction)                      | 56/77   | 4.5E-08  | 3.69E-06         |
| Hand grip strength                                                                         | 99/156  | 5.05E-08 | 3.96E-06         |
| Total body bone mineral density                                                            | 31/36   | 5.77E-08 | 4.32E-06         |
| Waist-hip ratio                                                                            | 44/58   | 1.65E-07 | 1.14E-05         |
| BMI in non-smokers                                                                         | 44/58   | 1.65E-07 | 1.14E-05         |
| Type 2 diabetes                                                                            | 217/397 | 2.08E-07 | 1.38E-05         |
| Restless legs syndrome                                                                     | 32/39   | 3.48E-07 | 2.22E-05         |
| Blond vs. brown/black hair color                                                           | 98/160  | 6.9E-07  | 4.25E-05         |
| Waist circumference adjusted for BMI (adjusted for smoking behaviour)                      | 56/81   | 7.21E-07 | 4.29E-05         |
| Amyotrophic lateral sclerosis (sporadic)                                                   | 109/182 | 8.3E-07  | 4.77E-05         |
| PR interval                                                                                | 48/67   | 8.6E-07  | 4.78E-05         |
| Motion sickness                                                                            | 27/32   | 1.01E-06 | 5.45E-05         |
| Male-pattern baldness                                                                      | 143/251 | 1.15E-06 | 6E-05            |
| Central corneal thickness                                                                  | 47/66   | 1.48E-06 | 7.14E-05         |
| Paclitaxel disposition in epithelial ovarian cancer                                        | 36/47   | 1.49E-06 | 7.14E-05         |
| Autism spectrum disorder, ADHD, bipolar disorder, MDD, and schizophrenia (combined)        | 36/47   | 1.49E-06 | 7.14E-05         |
| Rosacea symptom severity                                                                   | 87/141  | 1.84E-06 | 8.57E-05         |
| Waist circumference adjusted for BMI (joint analysis main effects and smoking interaction) | 54/79   | 1.98E-06 | 8.99E-05         |
| Waist circumference adjusted for body mass index                                           | 80/128  | 2.29E-06 | 0.000101         |
| Glaucoma (primary open-angle)                                                              | 52/76   | 2.92E-06 | 0.000124         |
