# Supplementary material
Source: PubMed Central journal article supplement (PMC7480002)
Supplement: 10577_2020_9639_MOESM6_ESM.pdf [file 10577_2020_9639_MOESM6_ESM.pdf]

**Supplemental Figure S6.** Gene ontology analyses of putative regulatory targets of genetic loci harboring human-specific SNCs using the Enrichr bioinformatics platform (see Methods for details).

## GO Molecular Function: 8,045 genes

cadherin binding (GO:0045296)

transcription regulatory region DNA binding (GO:0044212)

transcription factor activity, RNA polymerase II core promoter proximal region sequence-specific binding (GO:00

RNA polymerase II transcription factor binding (GO:0001085)

transcription regulatory region sequence-specific DNA binding (GO:0000976)

transcriptional activator activity, RNA polymerase II transcription regulatory region sequence-specific binding (GO

protein kinase binding (GO:0019901)

RNA polymerase II regulatory region sequence-specific DNA binding (GO:0000977)

protein kinase activity (GO:0004672)

transcriptional activator activity, RNA polymerase II core promoter proximal region sequence-specific binding (GO

## GO Biological Process: 8,045 genes

positive regulation of transcription from RNA polymerase II promoter (GO:0045944)

regulation of transcription from RNA polymerase II promoter (GO:0006357)

positive regulation of transcription, DNA-templated (GO:0045893)

nervous system development (GO:0007399)

regulation of apoptotic process (GO:0042981)

neuron differentiation (GO:0030182)

axonogenesis (GO:0007409)

negative regulation of apoptotic process (GO:0043066)

negative regulation of transcription, DNA-templated (GO:0045892)

generation of neurons (GO:0048699)

# GO Molecular Function: 8,045 genes

Enriched Terms

cadherin binding (GO:0043022)  
transcription factor ac...  
RNA polymerase II re...  
transcriptional activat...  
actin binding (GO:0005511)  
RNA polymerase II tra...  
GTPase activator acti...  
protein homodimeriza...  
GTPase activator acti...  
repressing transcrip...  
transcriptional transcri...  
protein kinase regulator...  
motor kinase binding...  
amyloid-beta binding...  
voltage-gated calcium c...  
polyubiquitin binding...  
microtubule N-acetylgl...  
core promoter cation c...  
transcriptional motor act...  
activating transcrip...  
transcriptional repres...  
BMP receptor activat...  
calcium ion binding (GO:0005511)  
protein serine/threonine...  
sodium/amino acid sy...  
voltage-gated potassi...

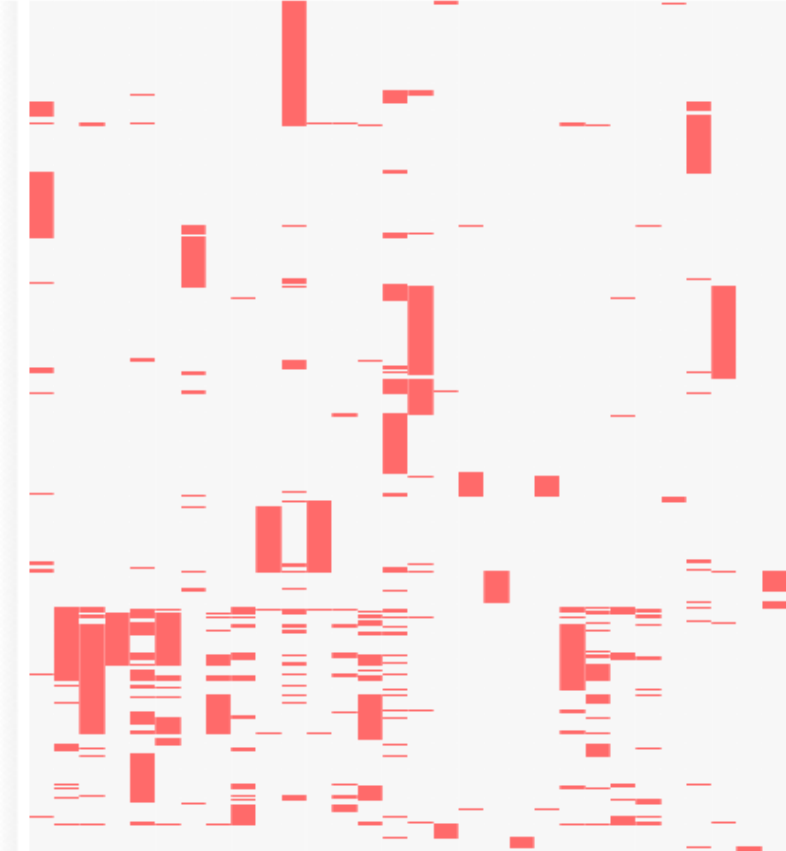

# GO Biological Process: 8,045 genes

Enriched Terms

positive regulation of...  
regulation of transcri...  
nervous system deve...  
regulation of transcri...  
neuron system of deve...  
axon differentiation...  
negative regulation of...  
negative regulation of...  
generation of neuron...  
regulation of neuron...  
positive regulation of...  
regulation of cell proli...  
axon guidance (GO:0007344)  
negative regulation of...  
negative regulation of...  
protein regulation of...  
negative regulation of...  
positive regulation of...  
transmembrane protei...  
positive regulation of...  
activation of protein k...  
positive regulation of...  
central nervous syste...  
regulation of protein k...  
positive regulation of...  
cellular protein modifi...

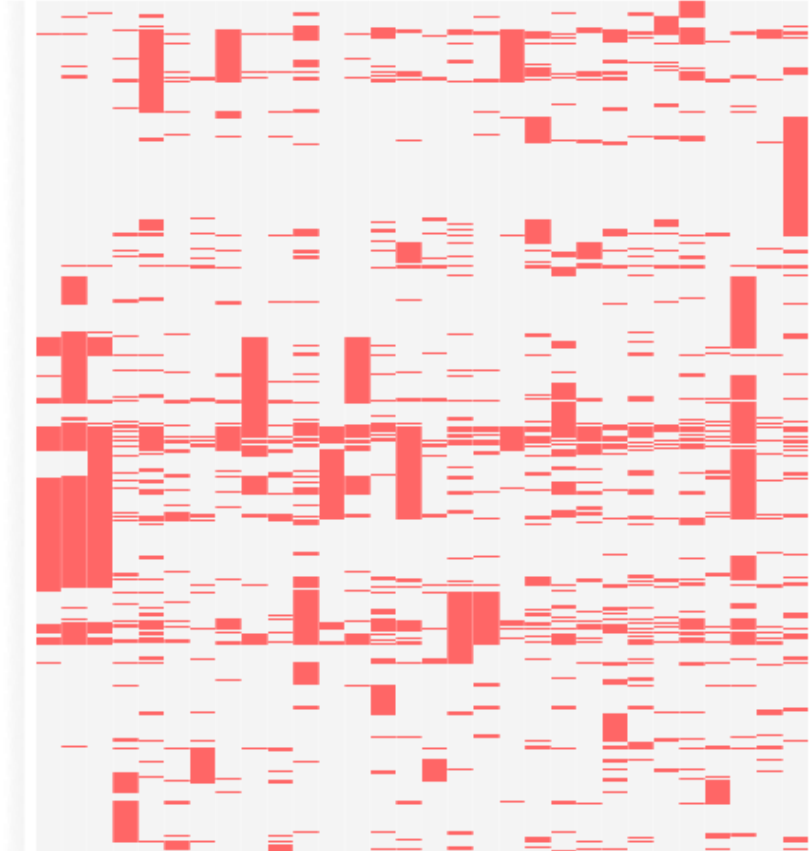

Input Genes

Input Genes

## GO Biological Process (8,045 genes): Top 35 of 308 significant records

| Term                                                                              | Overlap                 | P-value                  | Adjusted P-value         |
|-----------------------------------------------------------------------------------|-------------------------|--------------------------|--------------------------|
| positive regulation of transcription from RNA polymerase II promoter (GO:0045944) | 485/849                 | 1.12E-19                 | 5.67E-16                 |
| regulation of transcription from RNA polymerase II promoter (GO:0006357)          | 786/1479                | 2.51E-19                 | 6.37E-16                 |
| positive regulation of transcription, DNA-templated (GO:0045893)                  | 611/1121                | 3.46E-18                 | 5.85E-15                 |
| <a href="#">nervous system development (GO:0007399)</a>                           | <a href="#">276/456</a> | <a href="#">7.07E-16</a> | <a href="#">8.98E-13</a> |
| regulation of apoptotic process (GO:0042981)                                      | 453/816                 | 1.74E-15                 | 1.77E-12                 |
| <a href="#">neuron differentiation (GO:0030182)</a>                               | <a href="#">100/140</a> | <a href="#">1.57E-12</a> | <a href="#">1.33E-09</a> |
| <a href="#">axonogenesis (GO:0007409)</a>                                         | <a href="#">146/224</a> | <a href="#">1.88E-12</a> | <a href="#">1.37E-09</a> |
| negative regulation of apoptotic process (GO:0043066)                             | 279/486                 | 3.63E-12                 | 2.31E-09                 |
| negative regulation of transcription, DNA-templated (GO:0045892)                  | 437/814                 | 5.44E-12                 | 3.07E-09                 |
| <a href="#">generation of neurons (GO:0048699)</a>                                | <a href="#">93/131</a>  | <a href="#">1.66E-11</a> | <a href="#">7.69E-09</a> |
| regulation of cell proliferation (GO:0042127)                                     | 400/741                 | 1.67E-11                 | 7.69E-09                 |
| positive regulation of nucleic acid-templated transcription (GO:1903508)          | 284/503                 | 2.98E-11                 | 1.26E-08                 |
| negative regulation of transcription from RNA polymerase II promoter (GO:0000122) | 314/566                 | 4.51E-11                 | 1.76E-08                 |
| regulation of cell migration (GO:0030334)                                         | 190/317                 | 7.61E-11                 | 2.76E-08                 |
| positive regulation of gene expression (GO:0010628)                               | 410/772                 | 1.69E-10                 | 5.73E-08                 |
| <a href="#">axon guidance (GO:0007411)</a>                                        | <a href="#">106/159</a> | <a href="#">2.78E-10</a> | <a href="#">8.82E-08</a> |
| negative regulation of cellular process (GO:0048523)                              | 295/535                 | 4.21E-10                 | 1.26E-07                 |
| negative regulation of cell proliferation (GO:0008285)                            | 210/364                 | 9.35E-10                 | 2.64E-07                 |
| negative regulation of programmed cell death (GO:0043069)                         | 232/409                 | 1.08E-09                 | 2.88E-07                 |
| protein phosphorylation (GO:0006468)                                              | 261/471                 | 2.26E-09                 | 5.62E-07                 |
| negative regulation of gene expression (GO:0010629)                               | 332/619                 | 2.32E-09                 | 5.62E-07                 |
| positive regulation of macromolecule metabolic process (GO:0010604)               | 165/277                 | 2.5E-09                  | 5.78E-07                 |
| transmembrane receptor protein tyrosine kinase signaling pathway (GO:0007169)     | 224/397                 | 3.91E-09                 | 8.63E-07                 |
| positive regulation of cell differentiation (GO:0045597)                          | 122/195                 | 5.25E-09                 | 1.11E-06                 |
| activation of protein kinase activity (GO:0032147)                                | 142/234                 | 5.85E-09                 | 1.19E-06                 |
| positive regulation of protein phosphorylation (GO:0001934)                       | 231/413                 | 6.36E-09                 | 1.24E-06                 |
| <a href="#">central nervous system development (GO:0007417)</a>                   | <a href="#">133/218</a> | <a href="#">1.1E-08</a>  | <a href="#">2.06E-06</a> |
| negative regulation of cellular macromolecule biosynthetic process (GO:2000113)   | 278/513                 | 1.29E-08                 | 2.34E-06                 |
| regulation of transcription, DNA-templated (GO:0006355)                           | 776/1599                | 2.65E-08                 | 4.64E-06                 |
| positive regulation of epithelial cell migration (GO:0010634)                     | 55/75                   | 3.67E-08                 | 6.13E-06                 |
| cellular protein modification process (GO:0006464)                                | 504/1002                | 3.74E-08                 | 6.13E-06                 |
| positive regulation of cell migration (GO:0030335)                                | 133/222                 | 5.27E-08                 | 8.35E-06                 |
| positive regulation of cell proliferation (GO:0008284)                            | 233/425                 | 5.42E-08                 | 8.35E-06                 |
| <a href="#">neuron projection morphogenesis (GO:0048812)</a>                      | <a href="#">103/164</a> | <a href="#">5.98E-08</a> | <a href="#">8.94E-06</a> |
| positive regulation of multicellular organismal process (GO:0051240)              | 123/203                 | 6.72E-08                 | 9.66E-06                 |

## GO Molecular Function (8,045 genes): Top 30 of 81 significant records

| Term                                                                                                                         | Overlap | P-value  | Adjusted P-value |
|------------------------------------------------------------------------------------------------------------------------------|---------|----------|------------------|
| cadherin binding (GO:0045296)                                                                                                | 191/314 | 1.1E-11  | 1.26E-08         |
| transcription regulatory region DNA binding (GO:0044212)                                                                     | 216/375 | 6.56E-10 | 3.76E-07         |
| transcription factor activity, RNA polymerase II core promoter proximal region sequence-specific binding (GO:0000982)        | 168/281 | 1.22E-09 | 4.66E-07         |
| RNA polymerase II transcription factor binding (GO:0001085)                                                                  | 84/122  | 1.79E-09 | 5.11E-07         |
| transcription regulatory region sequence-specific DNA binding (GO:0000976)                                                   | 171/293 | 1.06E-08 | 2.43E-06         |
| transcriptional activator activity, RNA polymerase II transcription regulatory region sequence-specific binding (GO:0001228) | 166/285 | 2.1E-08  | 4.01E-06         |
| protein kinase binding (GO:0019901)                                                                                          | 268/496 | 3.35E-08 | 5.4E-06          |
| RNA polymerase II regulatory region sequence-specific DNA binding (GO:0000977)                                               | 251/461 | 3.78E-08 | 5.4E-06          |
| protein kinase activity (GO:0004672)                                                                                         | 276/514 | 4.5E-08  | 5.72E-06         |
| transcriptional activator activity, RNA polymerase II core promoter proximal region sequence-specific binding (GO:0001077)   | 109/176 | 7.35E-08 | 8.4E-06          |
| GTPase regulator activity (GO:0030695)                                                                                       | 154/276 | 2.44E-06 | 0.000254         |
| amyloid-beta binding (GO:0001540)                                                                                            | 37/50   | 4.47E-06 | 0.000426         |
| protein serine/threonine kinase activity (GO:0004674)                                                                        | 197/369 | 5.99E-06 | 0.000518         |
| repressing transcription factor binding (GO:0070491)                                                                         | 39/54   | 6.67E-06 | 0.000518         |
| RNA polymerase II regulatory region DNA binding (GO:0001012)                                                                 | 116/202 | 6.8E-06  | 0.000518         |
| GTPase activator activity (GO:0005096)                                                                                       | 139/250 | 9.43E-06 | 0.000675         |
| voltage-gated cation channel activity (GO:0022843)                                                                           | 64/101  | 1.2E-05  | 0.000807         |
| motor activity (GO:0003774)                                                                                                  | 56/86   | 1.28E-05 | 0.000811         |
| regulatory region DNA binding (GO:0000975)                                                                                   | 126/225 | 1.52E-05 | 0.000916         |
| core promoter proximal region sequence-specific DNA binding (GO:0000987)                                                     | 152/279 | 1.65E-05 | 0.000943         |
| protein homodimerization activity (GO:0042803)                                                                               | 332/665 | 1.79E-05 | 0.000973         |
| actin binding (GO:0003779)                                                                                                   | 140/255 | 2.09E-05 | 0.001086         |
| PDZ domain binding (GO:0030165)                                                                                              | 43/63   | 2.29E-05 | 0.001141         |
| RNA polymerase II core promoter proximal region sequence-specific DNA binding (GO:0000978)                                   | 143/263 | 3.29E-05 | 0.001569         |
| transcriptional repressor activity, RNA polymerase II transcription regulatory region sequence-specific binding (GO:0001227) | 92/160  | 5.43E-05 | 0.002452         |
| protein tyrosine kinase activity (GO:0004713)                                                                                | 86/148  | 5.57E-05 | 0.002452         |
| microtubule motor activity (GO:0003777)                                                                                      | 41/61   | 6.16E-05 | 0.002608         |
| tubulin binding (GO:0015631)                                                                                                 | 138/256 | 7.7E-05  | 0.003145         |
| microtubule binding (GO:0008017)                                                                                             | 109/196 | 8.13E-05 | 0.003208         |
| acetylgalactosaminyltransferase activity (GO:0008376)                                                                        | 34/49   | 9.81E-05 | 0.003742         |



## GO Cellular Component (8,045 genes): 29 significant records

| Term                                                    | Overlap                 | P-value                  | Adjusted P-value         |
|---------------------------------------------------------|-------------------------|--------------------------|--------------------------|
| cytoskeleton (GO:0005856)                               | 284/521                 | 4.18E-09                 | 1.85E-06                 |
| <a href="#">dendrite (GO:0030425)</a>                   | <a href="#">131/216</a> | <a href="#">2.35E-08</a> | <a href="#">5.12E-06</a> |
| <a href="#">axon (GO:0030424)</a>                       | <a href="#">92/142</a>  | <a href="#">3.47E-08</a> | <a href="#">5.12E-06</a> |
| actin cytoskeleton (GO:0015629)                         | 169/295                 | 7.67E-08                 | 8.23E-06                 |
| integral component of plasma membrane (GO:0005887)      | 711/1464                | 9.29E-08                 | 8.23E-06                 |
| focal adhesion (GO:0005925)                             | 194/357                 | 1.52E-06                 | 0.000112                 |
| Golgi subcompartment (GO:0098791)                       | 250/480                 | 4.46E-06                 | 0.000282                 |
| perinuclear region of cytoplasm (GO:0048471)            | 198/379                 | 3.32E-05                 | 0.001839                 |
| cytoplasmic vesicle membrane (GO:0030659)               | 38/55                   | 4.48E-05                 | 0.002203                 |
| Golgi membrane (GO:0000139)                             | 225/443                 | 0.000104                 | 0.004546                 |
| cortical cytoskeleton (GO:0030863)                      | 36/53                   | 0.000123                 | 0.004546                 |
| cortical actin cytoskeleton (GO:0030864)                | 36/53                   | 0.000123                 | 0.004546                 |
| caveola (GO:0005901)                                    | 38/57                   | 0.000148                 | 0.00505                  |
| filopodium (GO:0030175)                                 | 40/61                   | 0.000173                 | 0.005461                 |
| membrane raft (GO:0045121)                              | 70/120                  | 0.000224                 | 0.006622                 |
| endoplasmic reticulum lumen (GO:0005788)                | 142/271                 | 0.000339                 | 0.009382                 |
| microtubule organizing center (GO:0005815)              | 251/508                 | 0.000401                 | 0.010456                 |
| cytoplasmic vesicle (GO:0031410)                        | 115/216                 | 0.000546                 | 0.013065                 |
| chromatin (GO:0000785)                                  | 153/297                 | 0.00056                  | 0.013065                 |
| nuclear chromatin (GO:0000790)                          | 132/254                 | 0.000826                 | 0.018285                 |
| catenin complex (GO:0016342)                            | 21/29                   | 0.0009                   | 0.018978                 |
| ionotropic glutamate receptor complex (GO:0008328)      | 27/40                   | 0.001001                 | 0.020165                 |
| <a href="#">dendrite membrane (GO:0032590)</a>          | <a href="#">16/21</a>   | <a href="#">0.001571</a> | <a href="#">0.030261</a> |
| cation channel complex (GO:0034703)                     | 40/66                   | 0.00177                  | 0.032667                 |
| centrosome (GO:0005813)                                 | 225/462                 | 0.00199                  | 0.035259                 |
| <a href="#">main axon (GO:0044304)</a>                  | <a href="#">23/34</a>   | <a href="#">0.002257</a> | <a href="#">0.038461</a> |
| junctional sarcoplasmic reticulum membrane (GO:0014701) | 10-Sep                  | 0.002537                 | 0.040494                 |
| microtubule cytoskeleton (GO:0015630)                   | 191/389                 | 0.002642                 | 0.040494                 |
| actin-based cell projection (GO:0098858)                | 42/71                   | 0.002651                 | 0.040494                 |
| ruffle membrane (GO:0032587)                            | 33/54                   | 0.003598                 | 0.053124                 |
