# Supplementary material
Source: PubMed Central journal article supplement (PMC7480002)
Supplement: 10577_2020_9639_MOESM8_ESM.pdf [file 10577_2020_9639_MOESM8_ESM.pdf]

**Supplemental Figure S8.** Interrogation of MGI

Mammalian Phenotype databases identifies genes associated with human-specific SNCs and implicated in premature death and embryonic, perinatal, neonatal, and postnatal lethality phenotypes using the Enrichr bioinformatics platform (see Methods for details).

## MGI Mammalian Phenotype 2017: 8,405 genes

MP:0001262\_decreased\_body\_weight

MP:0011087\_neonatal\_lethality,\_complete\_penetrance

MP:0001265\_decreased\_body\_size

MP:0011086\_postnatal\_lethality,\_incomplete\_penetrance

MP:0011090\_perinatal\_lethality,\_incomplete\_penetrance

MP:0001899\_absent\_long\_term\_depression

MP:0011109\_lethality\_throughout\_fetal\_growth\_and\_development,\_incomplete\_penetrance

MP:0011085\_postnatal\_lethality,\_complete\_penetrance

MP:0002083\_premature\_death

MP:0002169\_no\_abnormal\_phenotype\_detected

# MGI Mammalian Phenotype 2017: 8,405 genes

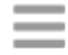

## Enriched Terms

Input Genes

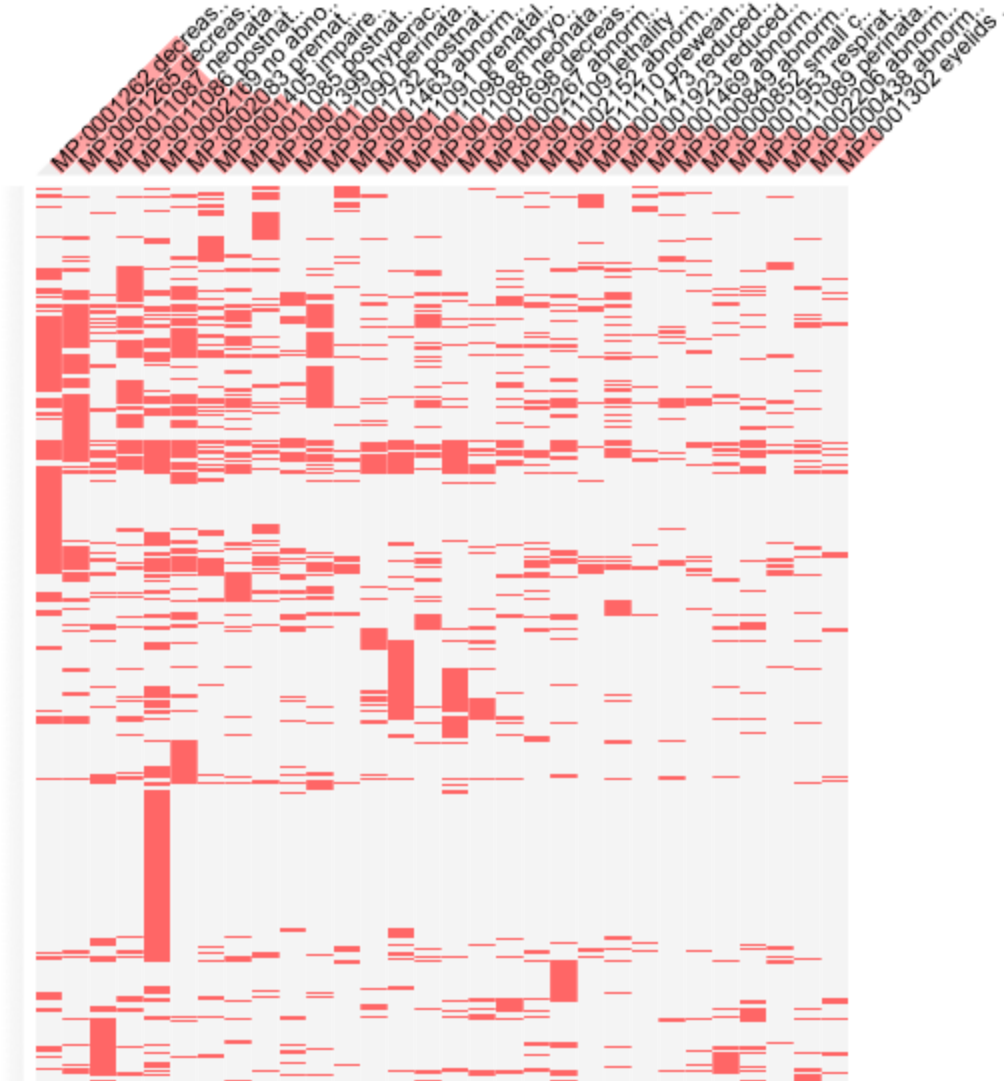

# MGI Mammalian Phenotype 2017 (8,405 genes): Top 40 of 749 significant records

| Term                                                                                | Overlap  | P-value  | Adjusted P-value |
|-------------------------------------------------------------------------------------|----------|----------|------------------|
| MP:0001262_decreased_body_weight                                                    | 692/1189 | 4.71E-31 | 2.44E-27         |
| MP:0001265_decreased_body_size                                                      | 472/774  | 2.25E-27 | 5.82E-24         |
| MP:0011087_neonatal_lethality,_complete_penetrance                                  | 299/462  | 2.47E-23 | 4.25E-20         |
| MP:0011086_postnatal_lethality,_incomplete_penetrance                               | 346/563  | 4.06E-21 | 5.26E-18         |
| MP:0002169_no_abnormal_phenotype_detected                                           | 882/1674 | 2.98E-20 | 3.08E-17         |
| MP:0002083_premature_death                                                          | 474/834  | 1.12E-18 | 9.65E-16         |
| MP:0001405_impaired_coordination                                                    | 215/332  | 3.43E-17 | 2.54E-14         |
| MP:0011085_postnatal_lethality,_complete_penetrance                                 | 238/384  | 1.57E-15 | 1.02E-12         |
| MP:0001399_hyperactivity                                                            | 216/344  | 4.36E-15 | 2.51E-12         |
| MP:0011090_perinatal_lethality,_incomplete_penetrance                               | 152/226  | 1.28E-14 | 6.65E-12         |
| MP:0001732_postnatal_growth_retardation                                             | 339/590  | 1.43E-14 | 6.75E-12         |
| MP:0001463_abnormal_spatial_learning                                                | 115/162  | 6.87E-14 | 2.96E-11         |
| MP:0011091_prenatal_lethality,_complete_penetrance                                  | 174/272  | 1.81E-13 | 7.22E-11         |
| MP:0011098_embryonic_lethality_during_organogenesis,_complete_penetrance            | 319/559  | 2.9E-13  | 1.07E-10         |
| MP:0011088_neonatal_lethality,_incomplete_penetrance                                | 163/255  | 1.15E-12 | 3.97E-10         |
| MP:0001698_decreased_embryo_size                                                    | 273/472  | 1.96E-12 | 6.36E-10         |
| MP:0000267_abnormal_heart_development                                               | 109/157  | 3.11E-12 | 9.48E-10         |
| MP:0011109_lethality_throughout_fetal_growth_and_development,_incomplete_penetrance | 116/170  | 3.92E-12 | 1.13E-09         |
| MP:0002152_abnormal_brain_morphology                                                | 104/152  | 3.9E-11  | 1.06E-08         |
| MP:0011110_preweaning_lethality,_incomplete_penetrance                              | 222/381  | 8.85E-11 | 2.29E-08         |
| MP:0001473_reduced_long_term_potentiation                                           | 77/106   | 1.52E-10 | 3.75E-08         |
| MP:0001923_reduced_female_fertility                                                 | 142/227  | 3.06E-10 | 7.2E-08          |
| MP:0004811_abnormal_neuron_physiology                                               | 67/90    | 4.06E-10 | 8.85E-08         |
| MP:0000788_abnormal_cerebral_cortex_morphology                                      | 98/145   | 4.1E-10  | 8.85E-08         |
| MP:0001406_abnormal_gait                                                            | 180/302  | 4.48E-10 | 9.28E-08         |
| MP:0001469_abnormal_contextual_conditioning_behavior                                | 45/54    | 4.96E-10 | 9.82E-08         |
| MP:0000849_abnormal_cerebellum_morphology                                           | 68/92    | 5.12E-10 | 9.82E-08         |
| MP:0000266_abnormal_heart_morphology                                                | 139/224  | 1.03E-09 | 1.91E-07         |
| MP:0000852_small_cerebellum                                                         | 52/66    | 1.15E-09 | 2.05E-07         |
| MP:0001953_respiratory_failure                                                      | 98/147   | 1.29E-09 | 2.23E-07         |
| MP:0011089_perinatal_lethality,_complete_penetrance                                 | 135/217  | 1.41E-09 | 2.35E-07         |
| MP:0002206_abnormal_CNS_synaptic_transmission                                       | 66/90    | 1.6E-09  | 2.59E-07         |
| MP:0000438_abnormal_cranium_morphology                                              | 90/133   | 1.91E-09 | 2.99E-07         |
| MP:0001302_eyelids_open_at_birth                                                    | 43/52    | 1.97E-09 | 3E-07            |
| MP:0000807_abnormal_hippocampus_morphology                                          | 63/86    | 4.04E-09 | 5.97E-07         |
| MP:0006009_abnormal_neuronal_migration                                              | 57/76    | 5.14E-09 | 7.28E-07         |
| MP:0001954_respiratory_distress                                                     | 111/174  | 5.2E-09  | 7.28E-07         |
| MP:0001899_absent_long_term_depression                                              | 25/26    | 5.88E-09 | 7.95E-07         |
| MP:0002906_increased_susceptibility_to_pharmacologically_induced_seizures           | 65/90    | 5.99E-09 | 7.95E-07         |
| MP:0003633_abnormal_nervous_system_physiology                                       | 74/106   | 6.33E-09 | 8.12E-07         |

## MGI Mammalian Phenotype Level 4 2019: 8.405 genes

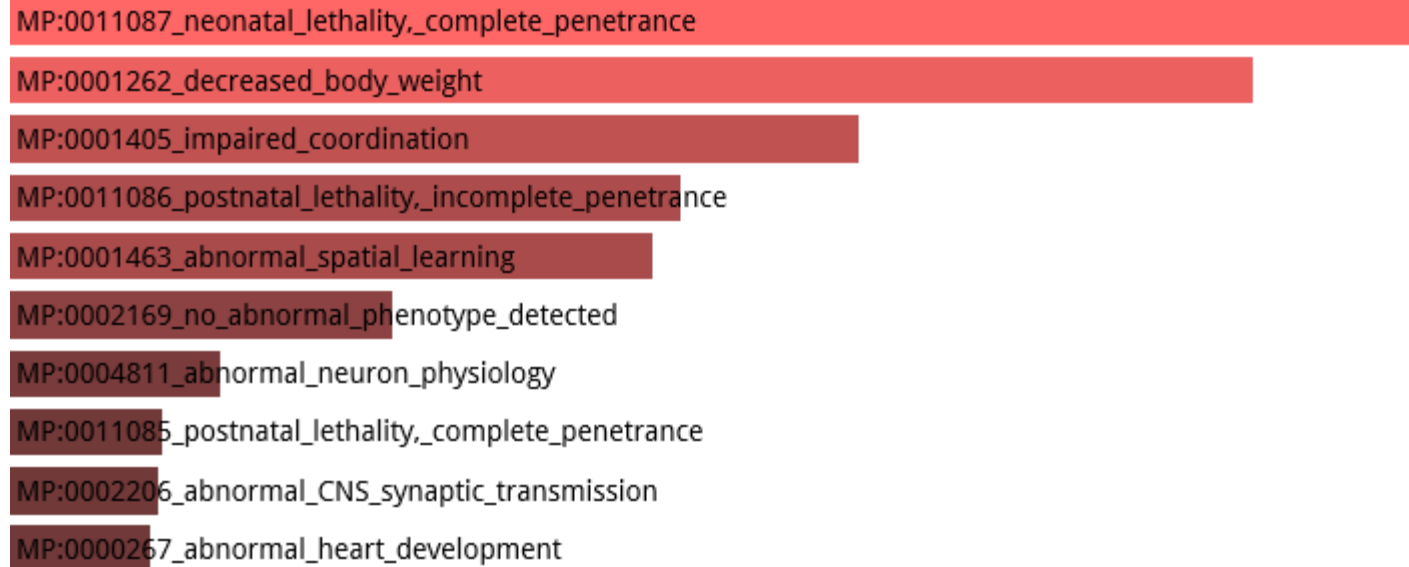

# MGI Mammalian Phenotype Level 4 2019: 8.405 genes

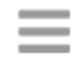

## Enriched Terms

Input Genes

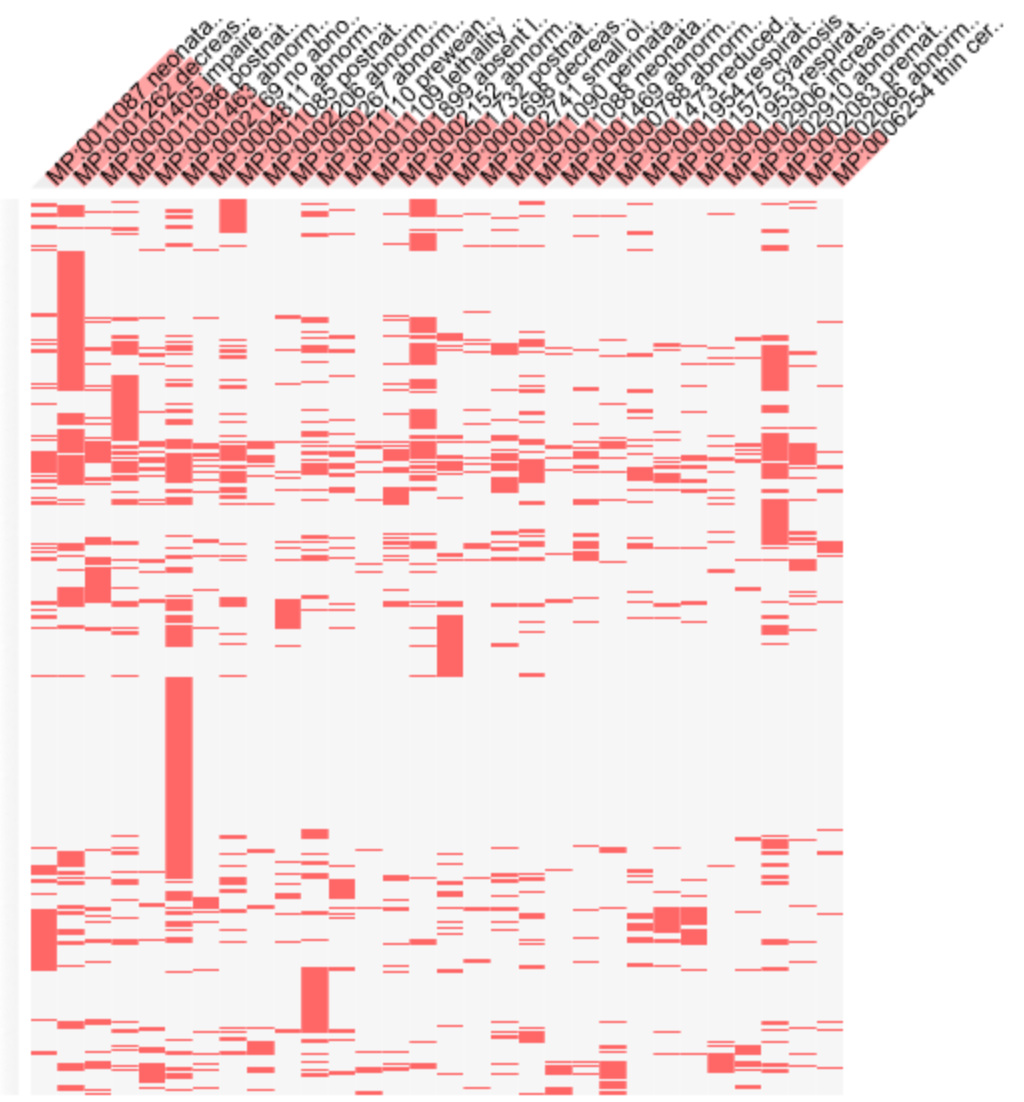

# MGI Mammalian Phenotype Level 4 2019 (8,405 genes): top 40 of 407 significant records

| Term                                                                                | Overlap  | P-value | Adjusted P-value |          |
|-------------------------------------------------------------------------------------|----------|---------|------------------|----------|
| MP:0011087_neonatal_lethality,_complete_penetrance                                  | 315/517  |         | 1.55E-18         | 8.15E-15 |
| MP:0001262_decreased_body_weight                                                    | 773/1471 |         | 2.04E-17         | 5.36E-14 |
| MP:0001405_impaired_coordination                                                    | 247/405  |         | 6.90E-15         | 1.21E-11 |
| MP:0011086_postnatal_lethality,_incomplete_penetrance                               | 362/643  |         | 9.65E-14         | 1.27E-10 |
| MP:0001463_abnormal_spatial_learning                                                | 120/172  |         | 1.46E-13         | 1.54E-10 |
| MP:0002169_no_abnormal_phenotype_detected                                           | 958/1944 |         | 6.87E-12         | 6.02E-09 |
| MP:0004811_abnormal_neuron_physiology                                               | 78/107   |         | 8.69E-11         | 6.53E-08 |
| MP:0002206_abnormal_CNS_synaptic_transmission                                       | 75/103   |         | 2.18E-10         | 1.27E-07 |
| MP:0000267_abnormal_heart_development                                               | 111/168  |         | 2.43E-10         | 1.28E-07 |
| MP:0011085_postnatal_lethality,_complete_penetrance                                 | 246/432  |         | 2.04E-10         | 1.34E-07 |
| MP:0011110_prewaning_lethality,_incomplete_penetrance                               | 360/669  |         | 2.90E-10         | 1.39E-07 |
| MP:0011109_lethality_throughout_fetal_growth_and_development,_incomplete_penetrance | 122/191  |         | 8.21E-10         | 3.60E-07 |
| MP:0001899_absent_long_term_depression                                              | 27/28    |         | 1.11E-09         | 4.50E-07 |
| MP:0001732_postnatal_growth_retardation                                             | 360/677  |         | 1.85E-09         | 6.48E-07 |
| MP:0001698_decreased_embryo_size                                                    | 293/537  |         | 2.09E-09         | 6.88E-07 |
| MP:0002152_abnormal_brain_morphology                                                | 119/187  |         | 1.84E-09         | 6.92E-07 |
| MP:0011090_perinatal_lethality,_incomplete_penetrance                               | 154/256  |         | 3.23E-09         | 9.44E-07 |
| MP:0002741_small_olfactory_bulb                                                     | 35/40    |         | 3.07E-09         | 9.51E-07 |
| MP:0001469_abnormal_contextual_conditioning_behavior                                | 48/61    |         | 5.45E-09         | 1.43E-06 |
| MP:0001473_reduced_long_term_potentiation                                           | 84/124   |         | 6.05E-09         | 1.45E-06 |
| MP:0000788_abnormal_cerebral_cortex_morphology                                      | 104/161  |         | 5.79E-09         | 1.45E-06 |
| MP:0011088_neonatal_lethality,_incomplete_penetrance                                | 172/293  |         | 5.33E-09         | 1.48E-06 |
| MP:0001954_respiratory_distress                                                     | 121/194  |         | 7.90E-09         | 1.81E-06 |
| MP:0001575_cyanosis                                                                 | 129/210  |         | 1.00E-08         | 2.19E-06 |
| MP:0001953_respiratory_failure                                                      | 103/161  |         | 1.47E-08         | 3.09E-06 |
| MP:0002906_increased_susceptibility_to_pharmacologically_induced_seizures           | 70/101   |         | 2.60E-08         | 5.25E-06 |
| MP:0002910_abnormal_excitatory_postsynaptic_currents                                | 59/83    |         | 7.68E-08         | 1.50E-05 |
| MP:0002083_premature_death                                                          | 499/997  |         | 9.80E-08         | 1.84E-05 |
| MP:0002066_abnormal_motor_capabilities/coordination/movement                        | 102/164  |         | 1.41E-07         | 2.55E-05 |
| MP:0006254_thin_cerebral_cortex                                                     | 53/74    |         | 2.36E-07         | 4.14E-05 |
| MP:0011098_embryonic_lethality_during_organogenesis,_complete_penetrance            | 339/656  |         | 2.60E-07         | 4.28E-05 |
| MP:0000807_abnormal_hippocampus_morphology                                          | 63/92    |         | 2.56E-07         | 4.34E-05 |
| MP:0006009_abnormal_neuronal_migration                                              | 59/85    |         | 2.94E-07         | 4.69E-05 |
| MP:0011108_embryonic_lethality_during_organogenesis,_incomplete_penetrance          | 143/247  |         | 3.20E-07         | 4.95E-05 |
| MP:0000031_abnormal_cochlea_morphology                                              | 44/59    |         | 3.84E-07         | 5.77E-05 |
| MP:0000852_small_cerebellum                                                         | 58/84    |         | 4.91E-07         | 7.17E-05 |
| MP:0002063_abnormal_learning/memory/conditioning                                    | 42/56    |         | 5.43E-07         | 7.52E-05 |
| MP:0003633_abnormal_nervous_system_physiology                                       | 79/123   |         | 5.36E-07         | 7.62E-05 |
| MP:0010025_decreased_total_body_fat_amount                                          | 263/498  |         | 5.94E-07         | 8.01E-05 |
| MP:0009937_abnormal_neuron_differentiation                                          | 75/116   |         | 7.01E-07         | 9.22E-05 |
