# Supplementary material
Source: PubMed Central journal article supplement (PMC7480002)
Supplement: 10577_2020_9639_MOESM9_ESM.pdf [file 10577_2020_9639_MOESM9_ESM.pdf]

**Supplemental Figure S9.** Structurally, functionally, and evolutionary distinct classes of HSRS share the relatively restricted elite set of common genetic targets.

**Association with networks of human-specific regulatory sequences (HSGRS) and stem cell-associated retroviral sequences (SCARS) of 8,405 genes associated with 35,074 fixed human-specific single nucleotide changes located in differentially-accessible chromatin regions during human neurogenesis in cerebral organoids**

| <b>Classification category</b>                                           | <b>Number of genes</b> | <b>Perent</b> |
|--------------------------------------------------------------------------|------------------------|---------------|
| <b>Unique genes</b>                                                      | <b>8405</b>            | <b>100.00</b> |
| <b>In network of human-specific genomic regulatory sequences (HSGRS)</b> | <b>7406</b>            | <b>88.11</b>  |
| <b>LTR5_Hs/SVA_D enhancers-regulated genes</b>                           | <b>1387</b>            | <b>16.50</b>  |
| <b>HERVH lncRNA-regulated genes</b>                                      | <b>3191</b>            | <b>37.97</b>  |
| <b>LTR7Y/B enhancers-regulated genes</b>                                 | <b>3306</b>            | <b>39.33</b>  |
| <b>In network of stem cell-associated retroviral sequences (SCARS)</b>   | <b>5389</b>            | <b>64.12</b>  |
| <b>Both HSRGS &amp; SCARS-regulated genes</b>                            | <b>4805</b>            | <b>57.17</b>  |
| <b>All HSGRS &amp; SCARS-regulated genes</b>                             | <b>7990</b>            | <b>95.06</b>  |

**Effect of CRISPR-guided epigenetic silencing of LRT5\_Hs/SVA\_D enhancers on expression of 1,387 genes associated with human-specific SNC in DA chromatin regions**

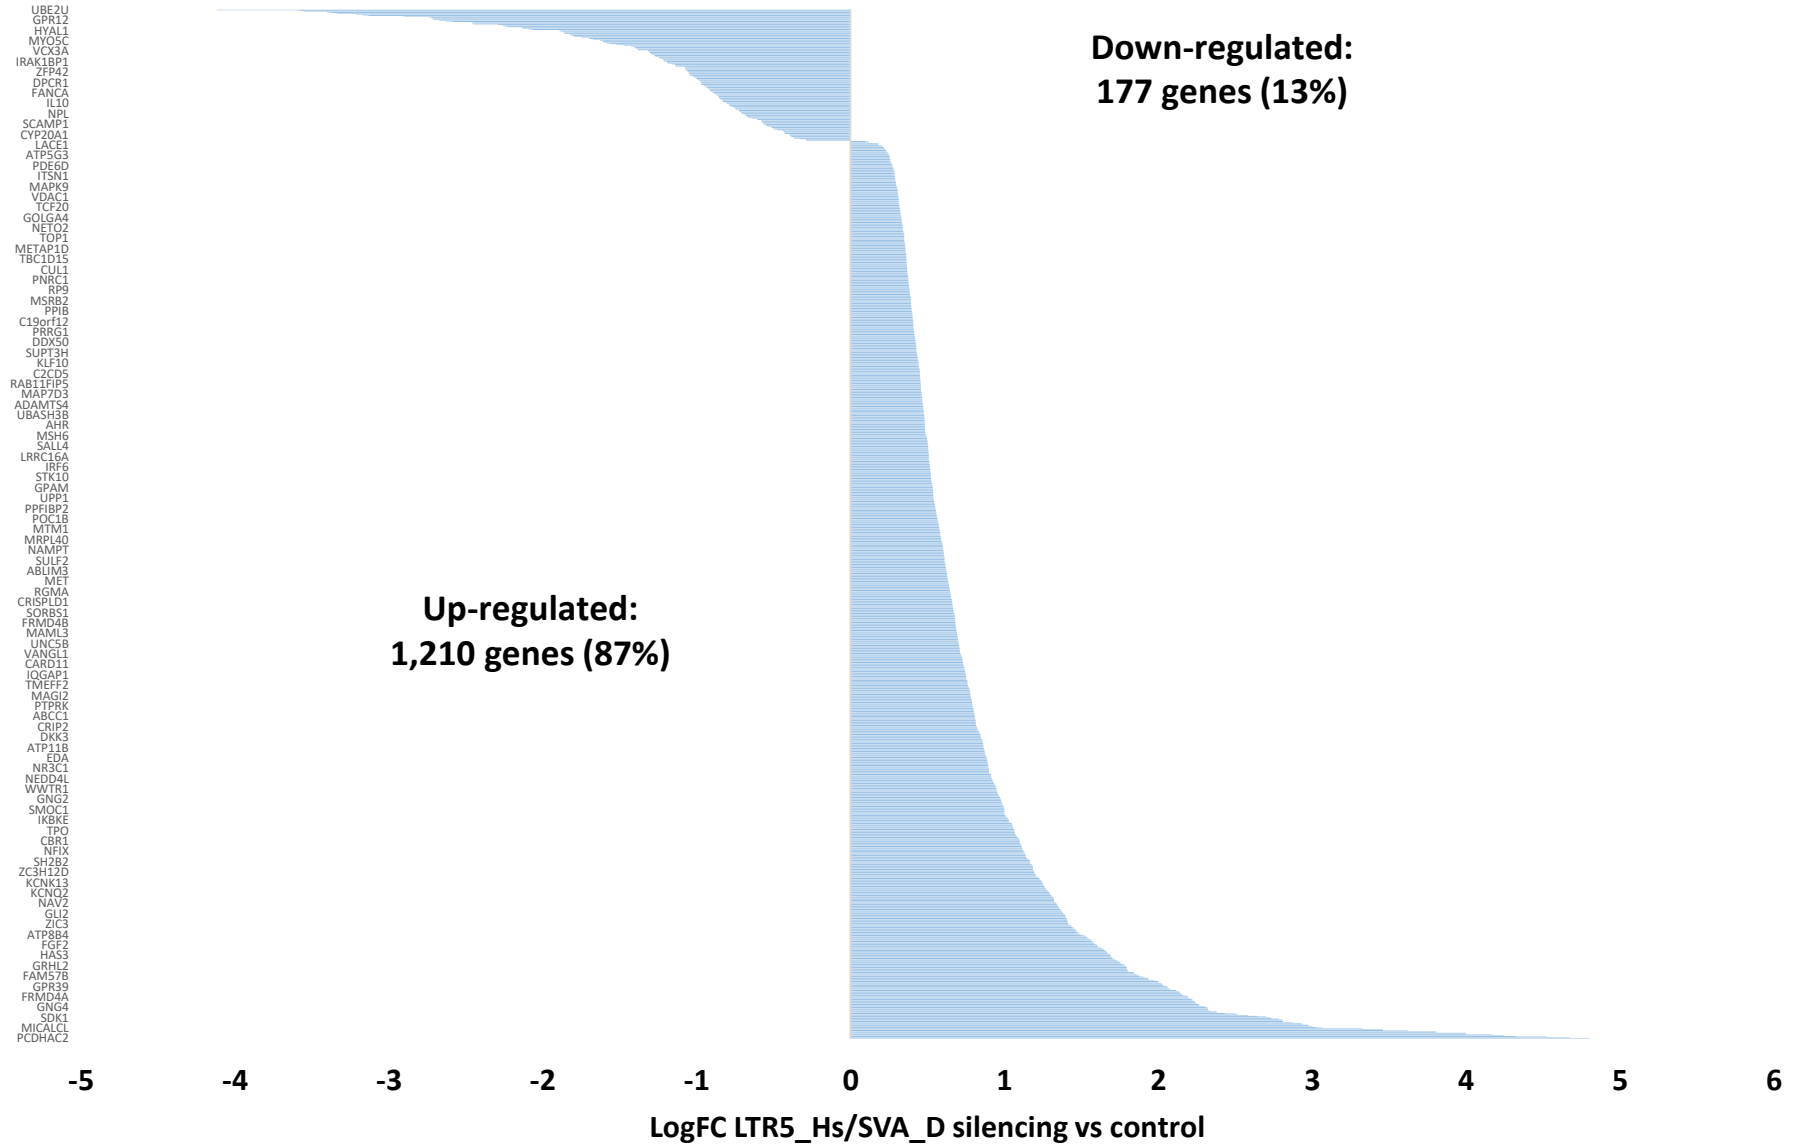

**Effects of stem cell-associated retroviral sequences (SCARS) on expression of 5,389 genes associated with human-specific neuro-regulatory SNC located in DA chromatin regions during brain development in cerebral organoids**

| <b>Classification category</b>                 | <b>Number of genes</b> | <b>Down-regulated</b> | <b>Percent</b> | <b>Up-regulated</b> | <b>Percent</b> |
|------------------------------------------------|------------------------|-----------------------|----------------|---------------------|----------------|
| <b>LTR5_Hs/SVA_D enhancers-regulated genes</b> | <b>1387</b>            | <b>1210</b>           | <b>87.24</b>   | <b>177</b>          | <b>12.76</b>   |
| <b>HERVH lncRNA-regulated genes</b>            | <b>3191</b>            | <b>1733</b>           | <b>54.31</b>   | <b>1458</b>         | <b>45.69</b>   |
| <b>LTR7Y/B enhancers-regulated genes</b>       | <b>3306</b>            | <b>2494</b>           | <b>75.44</b>   | <b>812</b>          | <b>24.56</b>   |
